# Supplementary material for: Inhibition of merozoite invasion and transient de-sequestration by sevuparin in humans with Plasmodium falciparum malaria
Source: PubMed Central journal article supplement (PMC5731734; doi:10.1371/journal.pone.0188754), 2017-12-15
Supplement: pone.0188754.s004.pdf [file pone.0188754.s004.pdf]

TSM02 Individual subject listings part 1

CSR Appendix 16.2

## **16 APPENDICES**

### **16.2 Subject data listings (fully anonymized)**

16.2.1 Discontinued subjects

None

TSM02 Individual subject listings part 1

CSR Appendix 16.2

16.2.2 Protocol deviations

16.2.3 Subjects excluded from the efficacy analysis (if applicable)

*Not applicable.*

16.2.4 Demographic data and other baseline characteristics

16.2.4.1 Demographics

| <b>SUBJID</b> | <b>INITIAL</b> | <b>ARM</b> | <b>SEX</b> | <b>ETHNIC</b> | <b>BIRTHDATE</b> |
|---------------|----------------|------------|------------|---------------|------------------|
|               |                | 1.5 mg/kg  | Female     | BURMESE       |                  |
|               |                | 1.5 mg/kg  | Female     | BURMESE       |                  |
|               |                | 1.5 mg/kg  | Male       | BURMESE       |                  |
|               |                | 3 mg/kg    | Male       | BURMESE       |                  |
|               |                | 3 mg/kg    | Male       | BURMESE       |                  |
|               |                | 3 mg/kg    | Male       | BURMESE       |                  |
|               |                | 6 mg/kg    | Male       | BURMESE       |                  |
|               |                | 6 mg/kg    | Male       | BURMESE       |                  |
|               |                | 6 mg/kg    | Female     | BURMESE       |                  |

TSM02 Individual subject listings part 1

CSR Appendix 16.2

16.2.4.2 Baseline symptoms

| SUBJID | INITIAL | ARM       | FEVER | DUR (Days) | DIZZI | DUR (Days) | NAUSEA | DUR (Days) | ANOREXIA | DUR (Days)<br><small>99=UNKNOWN</small> | VOMIT | DUR (Days) | TIMES in 24HOURS |
|--------|---------|-----------|-------|------------|-------|------------|--------|------------|----------|-----------------------------------------|-------|------------|------------------|
|        |         | 1.5 mg/kg | Yes   | 3          | No    |            | Yes    | 2          | No       |                                         | Yes   | 2          | 10               |
|        |         | 1.5 mg/kg | Yes   | 3          | No    |            | Yes    | 2          | Yes      | 2                                       | Yes   | 2          | 3                |
|        |         | 1.5 mg/kg | Yes   | 3          | No    |            | Yes    | 3          | Yes      | 3                                       | No    |            |                  |
|        |         | 3 mg/kg   | Yes   | 2          | No    |            | No     |            | No       |                                         | No    |            |                  |
|        |         | 3 mg/kg   | Yes   | 5          | No    |            | No     |            | Yes      | 3                                       | No    |            |                  |
|        |         | 3 mg/kg   | Yes   | 3          | No    |            | No     |            | Yes      | 3                                       | No    |            |                  |
|        |         | 6 mg/kg   | Yes   | 2          | Yes   | 1          | No     |            | No       |                                         | No    |            |                  |
|        |         | 6 mg/kg   | Yes   | 2          | No    |            | No     |            | No       |                                         | No    |            |                  |
|        |         | 6 mg/kg   | Yes   | 4          | No    |            | No     |            | Yes      | 99                                      | No    |            |                  |

16.2.4.2 Baseline symptoms (-continued)

|  |  | ARM       | DIARRHOEA | ABD PAIN | DUR (Days) | PAIN AREA | ITCHING | SKIN RASH | JOINT PAIN | MUSCLE PAIN | DUR (Days) | PALPITATIONS |
|--|--|-----------|-----------|----------|------------|-----------|---------|-----------|------------|-------------|------------|--------------|
|  |  | 1.5 mg/kg | No        | No       |            |           | No      | No        |            | Yes         | 1          | No           |
|  |  | 1.5 mg/kg | No        | No       |            |           | No      | No        |            | No          |            | No           |
|  |  | 1.5 mg/kg | No        | No       |            |           | No      | No        |            | No          |            | No           |
|  |  | 3 mg/kg   | No        | No       |            |           | No      | No        |            | No          |            | No           |
|  |  | 3 mg/kg   | No        | Yes      | 3          | EPI       | No      | No        |            | Yes         | 2          | No           |
|  |  | 3 mg/kg   | No        | No       |            |           | No      | No        |            | Yes         | 3          | No           |
|  |  | 6 mg/kg   | No        | No       |            |           | No      | No        |            | No          |            | No           |
|  |  | 6 mg/kg   | No        | No       |            |           | No      | No        |            | Yes         | 1          | No           |
|  |  | 6 mg/kg   | No        | No       |            |           | No      | No        |            | Yes         | 2          | No           |

TSM02 Individual subject listings part 1

CSR Appendix 16.2

16.2.4.2 Baseline symptoms (-continued)

| <b>SUBJID</b> | <b>INITIAL</b> | <b>ARM</b> | <b>DIFFICULTY BREATHING</b> | <b>DIFFICULTY HEARING</b> | <b>CONFUSION</b> | <b>BLURRED VISION</b> | <b>TIREDDNESS</b> | <b>HEADACHE</b> | <b>DUR (Days)</b> |
|---------------|----------------|------------|-----------------------------|---------------------------|------------------|-----------------------|-------------------|-----------------|-------------------|
|               |                | 1.5 mg/kg  | No                          | No                        | No               | No                    | No                | No              |                   |
|               |                | 1.5 mg/kg  | No                          | No                        | No               | No                    | No                | Yes             | 3                 |
|               |                | 1.5 mg/kg  | No                          | No                        | No               | No                    | No                | Yes             | 3                 |
|               |                | 3 mg/kg    | No                          | No                        | No               | No                    | No                | No              |                   |
|               |                | 3 mg/kg    | No                          | No                        | No               | No                    | No                | Yes             | 5                 |
|               |                | 3 mg/kg    | No                          | No                        | No               | No                    | No                | Yes             | 3                 |
|               |                | 6 mg/kg    | No                          | No                        | No               | No                    | No                | Yes             | 2                 |
|               |                | 6 mg/kg    | No                          | No                        | No               | No                    | No                | Yes             | 2                 |
|               |                | 6 mg/kg    | No                          | No                        | No               | No                    | No                | Yes             | 4                 |

TSM02 Individual subject listings part 1

CSR Appendix 16.2

16.2.4.3 Significant past medical history

None

16.2.4.4 Drug history

None

## 16.2.5 Compliance and drug concentration data

## 16.2.5.1 Listing of drug administration data (Malanil administration)

| SUBJID | INITIAL | ARM       | DOSE | DATE | TIME  | TABs | VOMIT | VOMIT TIME | RETREAT | RETREAT TIME | TABs |
|--------|---------|-----------|------|------|-------|------|-------|------------|---------|--------------|------|
|        |         | 1.5 mg/kg | 1    |      | 17:55 | 4    | Yes   | 19:45      | Yes     | 20:20        | 2    |
|        |         | 1.5 mg/kg | 2    |      | 16:00 | 4    | No    |            | No      |              |      |
|        |         | 1.5 mg/kg | 3    |      | 15:45 | 4    | No    |            | No      |              |      |
|        |         | 1.5 mg/kg | 1    |      | 15:35 | 4    | No    |            | No      |              |      |
|        |         | 1.5 mg/kg | 2    |      | 15:00 | 4    | No    |            | No      |              |      |
|        |         | 1.5 mg/kg | 3    |      | 15:00 | 4    | No    |            | No      |              |      |
|        |         | 1.5 mg/kg | 1    |      | 15:00 | 4    | No    |            | No      |              |      |
|        |         | 1.5 mg/kg | 2    |      | 14:45 | 4    | No    |            | No      |              |      |
|        |         | 1.5 mg/kg | 3    |      | 14:45 | 4    | No    |            | No      |              |      |
|        |         | 3 mg/kg   | 1    |      | 17:32 | 4    | No    |            | No      |              |      |
|        |         | 3 mg/kg   | 2    |      | 17:00 | 4    | No    |            | No      |              |      |
|        |         | 3 mg/kg   | 3    |      | 17:05 | 4    | No    |            | No      |              |      |
|        |         | 3 mg/kg   | 1    |      | 18:52 | 4    | No    |            | No      |              |      |
|        |         | 3 mg/kg   | 2    |      | 18:00 | 4    | No    |            | No      |              |      |
|        |         | 3 mg/kg   | 3    |      | 18:10 | 4    | No    |            | No      |              |      |
|        |         | 3 mg/kg   | 1    |      | 17:55 | 4    | No    |            | No      |              |      |
|        |         | 3 mg/kg   | 2    |      | 18:00 | 4    | No    |            | No      |              |      |
|        |         | 3 mg/kg   | 3    |      | 18:00 | 4    | No    |            | No      |              |      |
|        |         | 6 mg/kg   | 1    |      | 15:45 | 4    | No    |            | No      |              |      |
|        |         | 6 mg/kg   | 2    |      | 15:40 | 4    | No    |            | No      |              |      |
|        |         | 6 mg/kg   | 3    |      | 15:45 | 4    | No    |            | No      |              |      |
|        |         | 6 mg/kg   | 1    |      | 16:25 | 4    | No    |            | No      |              |      |
|        |         | 6 mg/kg   | 2    |      | 16:00 | 4    | No    |            | No      |              |      |
|        |         | 6 mg/kg   | 3    |      | 16:00 | 4    | No    |            | No      |              |      |
|        |         | 6 mg/kg   | 1    |      | 16:30 | 4    | No    |            | No      |              |      |
|        |         | 6 mg/kg   | 2    |      | 16:45 | 4    | No    |            | No      |              |      |
|        |         | 6 mg/kg   | 3    |      | 16:35 | 4    | No    |            | No      |              |      |

## TSM02 Individual subject listings part 1

## CSR Appendix 16.2

## 16.2.5.2 Listing of drug administration data (Sevuparin administration)

| SUBJID | INITIAL | ARM       | DOSE | DATE | TIME  | DRUG AGMIN (ml) |
|--------|---------|-----------|------|------|-------|-----------------|
|        |         | 1.5 mg/kg | 1    |      | 18:00 | 20              |
|        |         | 1.5 mg/kg | 2    |      | 23:55 | 20              |
|        |         | 1.5 mg/kg | 3    |      | 05:58 | 20              |
|        |         | 1.5 mg/kg | 4    |      | 11:55 | 20              |
|        |         | 1.5 mg/kg | 5    |      | 18:05 | 20              |
|        |         | 1.5 mg/kg | 6    |      | 23:55 | 20              |
|        |         | 1.5 mg/kg | 7    |      | 06:00 | 20              |
|        |         | 1.5 mg/kg | 8    |      | 11:53 | 20              |
|        |         | 1.5 mg/kg | 9    |      | 17:55 | 20              |
|        |         | 1.5 mg/kg | 10   |      | 23:57 | 20              |
|        |         | 1.5 mg/kg | 11   |      | 06:00 | 20              |
|        |         | 1.5 mg/kg | 12   |      | 11:55 | 20              |
|        |         | 1.5 mg/kg | 1    |      | 15:46 | 20              |
|        |         | 1.5 mg/kg | 2    |      | 21:45 | 20              |
|        |         | 1.5 mg/kg | 3    |      | 03:50 | 20              |
|        |         | 1.5 mg/kg | 4    |      | 09:46 | 20              |
|        |         | 1.5 mg/kg | 5    |      | 15:55 | 20              |
|        |         | 1.5 mg/kg | 6    |      | 21:40 | 20              |
|        |         | 1.5 mg/kg | 7    |      | 03:43 | 20              |
|        |         | 1.5 mg/kg | 8    |      | 09:46 | 20              |
|        |         | 1.5 mg/kg | 9    |      | 15:46 | 20              |
|        |         | 1.5 mg/kg | 10   |      | 21:40 | 20              |
|        |         | 1.5 mg/kg | 11   |      | 03:42 | 20              |
|        |         | 1.5 mg/kg | 12   |      | 10:00 | 20              |
|        |         | 1.5 mg/kg | 1    |      | 14:55 | 20              |
|        |         | 1.5 mg/kg | 2    |      | 20:57 | 20              |
|        |         | 1.5 mg/kg | 3    |      | 02:53 | 20              |
|        |         | 1.5 mg/kg | 4    |      | 08:58 | 20              |
|        |         | 1.5 mg/kg | 5    |      | 14:55 | 20              |
|        |         | 1.5 mg/kg | 6    |      | 20:55 | 20              |
|        |         | 1.5 mg/kg | 7    |      | 02:57 | 20              |
|        |         | 1.5 mg/kg | 8    |      | 08:55 | 20              |
|        |         | 1.5 mg/kg | 9    |      | 15:00 | 20              |
|        |         | 1.5 mg/kg | 10   |      | 20:55 | 20              |

## TSM02 Individual subject listings part 1

## CSR Appendix 16.2

| SUBJID | INITIAL | ARM       | DOSE | DATE | TIME  | DRUG AGMIN (ml) |
|--------|---------|-----------|------|------|-------|-----------------|
|        |         | 1.5 mg/kg | 11   |      | 02:55 | 20              |
|        |         | 1.5 mg/kg | 12   |      | 09:00 | 20              |
|        |         | 3 mg/kg   | 1    |      | 18:00 | 20              |
|        |         | 3 mg/kg   | 2    |      | 23:58 | 20              |
|        |         | 3 mg/kg   | 3    |      | 05:58 | 20              |
|        |         | 3 mg/kg   | 4    |      | 11:57 | 20              |
|        |         | 3 mg/kg   | 5    |      | 17:50 | 20              |
|        |         | 3 mg/kg   | 6    |      | 00:00 | 20              |
|        |         | 3 mg/kg   | 7    |      | 05:57 | 20              |
|        |         | 3 mg/kg   | 8    |      | 11:54 | 20              |
|        |         | 3 mg/kg   | 9    |      | 17:50 | 20              |
|        |         | 3 mg/kg   | 10   |      | 23:52 | 23.5            |
|        |         | 3 mg/kg   | 11   |      | 05:58 | 20              |
|        |         | 3 mg/kg   | 12   |      | 11:57 | 20              |
|        |         | 3 mg/kg   | 1    |      | 18:55 | 20              |
|        |         | 3 mg/kg   | 2    |      | 01:00 | 20              |
|        |         | 3 mg/kg   | 3    |      | 07:00 | 20              |
|        |         | 3 mg/kg   | 4    |      | 13:00 | 20              |
|        |         | 3 mg/kg   | 5    |      | 19:00 | 20              |
|        |         | 3 mg/kg   | 6    |      | 00:55 | 20              |
|        |         | 3 mg/kg   | 7    |      | 07:00 | 20              |
|        |         | 3 mg/kg   | 8    |      | 13:00 | 20              |
|        |         | 3 mg/kg   | 9    |      | 19:00 | 20              |
|        |         | 3 mg/kg   | 10   |      | 01:00 | 20              |
|        |         | 3 mg/kg   | 11   |      | 06:55 | 20              |
|        |         | 3 mg/kg   | 12   |      | 13:00 | 20              |
|        |         | 3 mg/kg   | 1    |      | 18:00 | 20              |
|        |         | 3 mg/kg   | 2    |      | 23:58 | 20              |
|        |         | 3 mg/kg   | 3    |      | 06:00 | 20              |
|        |         | 3 mg/kg   | 4    |      | 11:55 | 20              |
|        |         | 3 mg/kg   | 5    |      | 17:59 | 20              |
|        |         | 3 mg/kg   | 6    |      | 00:00 | 20              |
|        |         | 3 mg/kg   | 7    |      | 06:05 | 20              |
|        |         | 3 mg/kg   | 8    |      | 12:00 | 20              |
|        |         | 3 mg/kg   | 9    |      | 18:00 | 20              |
|        |         | 3 mg/kg   | 10   |      | 00:00 | 20              |
|        |         | 3 mg/kg   | 11   |      | 06:00 | 20              |



## TSM02 Individual subject listings part 1

## CSR Appendix 16.2

| SUBJID | INITIAL | ARM     | DOSE | DATE | TIME  | DRUG AGMIN (ml) |
|--------|---------|---------|------|------|-------|-----------------|
|        |         | 3 mg/kg | 12   |      | 12:00 | 20              |
|        |         | 6 mg/kg | 1    |      | 15:55 | 20              |
|        |         | 6 mg/kg | 2    |      | 22:00 | 20              |
|        |         | 6 mg/kg | 3    |      | 04:03 | 20              |
|        |         | 6 mg/kg | 4    |      | 10:00 | 20              |
|        |         | 6 mg/kg | 5    |      | 16:00 | 20              |
|        |         | 6 mg/kg | 6    |      | 21:57 | 20              |
|        |         | 6 mg/kg | 7    |      | 04:02 | 20              |
|        |         | 6 mg/kg | 8    |      | 10:00 | 20              |
|        |         | 6 mg/kg | 9    |      | 16:00 | 20              |
|        |         | 6 mg/kg | 10   |      | 22:00 | 20              |
|        |         | 6 mg/kg | 11   |      | 04:00 | 20              |
|        |         | 6 mg/kg | 12   |      | 10:00 | 20              |
|        |         | 6 mg/kg | 1    |      | 16:30 | 20              |
|        |         | 6 mg/kg | 2    |      | 22:26 | 20              |
|        |         | 6 mg/kg | 3    |      | 04:35 | 20              |
|        |         | 6 mg/kg | 4    |      | 10:28 | 20              |
|        |         | 6 mg/kg | 5    |      | 16:30 | 20              |
|        |         | 6 mg/kg | 6    |      | 22:30 | 20              |
|        |         | 6 mg/kg | 7    |      | 04:30 | 20              |
|        |         | 6 mg/kg | 8    |      | 10:30 | 20              |
|        |         | 6 mg/kg | 9    |      | 16:30 | 20              |
|        |         | 6 mg/kg | 10   |      | 22:30 | 20              |
|        |         | 6 mg/kg | 11   |      | 04:30 | 20              |
|        |         | 6 mg/kg | 12   |      | 10:30 | 20              |
|        |         | 6 mg/kg | 1    |      | 16:55 | 20              |
|        |         | 6 mg/kg | 2    |      | 23:00 | 20              |
|        |         | 6 mg/kg | 3    |      | 05:00 | 20              |
|        |         | 6 mg/kg | 4    |      | 11:00 | 20              |
|        |         | 6 mg/kg | 5    |      | 17:00 | 20              |
|        |         | 6 mg/kg | 6    |      | 22:55 | 20              |
|        |         | 6 mg/kg | 7    |      | 05:00 | 20              |
|        |         | 6 mg/kg | 8    |      | 11:00 | 20              |
|        |         | 6 mg/kg | 9    |      | 17:00 | 20              |
|        |         | 6 mg/kg | 10   |      | 22:50 | 20              |
|        |         | 6 mg/kg | 11   |      | 05:00 | 20              |
|        |         | 6 mg/kg | 12   |      | 11:00 | 20              |

TSM02 Individual subject listings part 1

CSR Appendix 16.2

16.2.6 Individual efficacy response data

16.2.6.1 Malaria Blood smear

(ND = Not Done)

| SUBJID | INITIAL | ARM       | TIMEPOINT | SPECIES | PARASITAEMIA<br>(/μL) | Tiny<br>Rings<br>(%) | Small<br>Rings<br>(%) | Large<br>Rings<br>(%) | Early<br>Troph<br>(%) | Mid<br>Troph<br>(%) | Late<br>Troph<br>(%) | Gamet<br>(%) | Schiz<br>(%) |
|--------|---------|-----------|-----------|---------|-----------------------|----------------------|-----------------------|-----------------------|-----------------------|---------------------|----------------------|--------------|--------------|
|        |         | 1.5 mg/kg | SCREENING | Pf      | Not available         | 79                   | 15                    | 6                     | 0                     | 0                   | 0                    | 0            | 0            |
|        |         | 1.5 mg/kg | D1H0      | Pf      | Not available         | 43                   | 45                    | 10                    | 2                     | 0                   | 0                    | 0            | 0            |
|        |         | 1.5 mg/kg | D1H0:30   | Pf      | Not available         | 48                   | 41                    | 8                     | 3                     | 0                   | 0                    | 0            | 0            |
|        |         | 1.5 mg/kg | D1H1      | Pf      | Not available         | 33                   | 40                    | 17                    | 9                     | 1                   | 0                    | 0            | 0            |
|        |         | 1.5 mg/kg | D1H1:30   | Pf      | Not available         | 35                   | 48                    | 11                    | 6                     | 0                   | 0                    | 0            | 0            |
|        |         | 1.5 mg/kg | D2H2      | Pf      | Not available         | 11                   | 45                    | 27                    | 17                    | 0                   | 0                    | 0            | 0            |
|        |         | 1.5 mg/kg | D1H3      | Pf      | Not available         | 17                   | 31                    | 22                    | 25                    | 5                   | 0                    | 0            | 0            |
|        |         | 1.5 mg/kg | D1H4      | Pf      | Not available         | 82                   | 15                    | 0                     | 2                     | 1                   | 0                    | 0            | 0            |
|        |         | 1.5 mg/kg | D1H6      | Pf      | Not available         | 83                   | 12                    | 3                     | 2                     | 0                   | 0                    | 0            | 0            |
|        |         | 1.5 mg/kg | D1H8      | Pf      | Not available         | 68                   | 12                    | 4                     | 15                    | 1                   | 0                    | 0            | 0            |
|        |         | 1.5 mg/kg | D1H10     | Pf      | Not available         | 57                   | 15                    | 3                     | 25                    | 0                   | 0                    | 0            | 0            |
|        |         | 1.5 mg/kg | D1H12     | Pf      | Not available         | 38                   | 40                    | 9                     | 13                    | 0                   | 0                    | 0            | 0            |
|        |         | 1.5 mg/kg | D1H18     | Pf      | Not available         | 15                   | 33                    | 22                    | 27                    | 3                   | 0                    | 0            | 0            |
|        |         | 1.5 mg/kg | D2H24     | Pf      | Not available         | 10                   | 32                    | 8                     | 44                    | 6                   | 0                    | 0            | 0            |
|        |         | 1.5 mg/kg | D2H30     | Pf      | Not available         | ND                   | ND                    | ND                    | ND                    | ND                  | ND                   | ND           | ND           |
|        |         | 1.5 mg/kg | D2H36     | Pf      | Not available         | ND                   | ND                    | ND                    | ND                    | ND                  | ND                   | ND           | ND           |
|        |         | 1.5 mg/kg | D2H42     | Pf      | Not available         | ND                   | ND                    | ND                    | ND                    | ND                  | ND                   | ND           | ND           |
|        |         | 1.5 mg/kg | D3H48     | Pf      | Not available         | ND                   | ND                    | ND                    | ND                    | ND                  | ND                   | ND           | ND           |

## TSM02 Individual subject listings part 1

## CSR Appendix 16.2

| SUBJID | INITIAL | ARM       | TIMEPOINT | SPECIES  | PARASITAEMIA<br>( $\mu$ L) | Tiny<br>Rings<br>(%) | Small<br>Rings<br>(%) | Large<br>Rings<br>(%) | Early<br>Troph<br>(%) | Mid<br>Troph<br>(%) | Late<br>Troph<br>(%) | Gamet<br>(%) | Schiz<br>(%) |
|--------|---------|-----------|-----------|----------|----------------------------|----------------------|-----------------------|-----------------------|-----------------------|---------------------|----------------------|--------------|--------------|
|        |         | 1.5 mg/kg | D3H54     | Pf       | Not available              | ND                   | ND                    | ND                    | ND                    | ND                  | ND                   | ND           | ND           |
|        |         | 1.5 mg/kg | D3H60     | Pf       | Not available              | ND                   | ND                    | ND                    | ND                    | ND                  | ND                   | ND           | ND           |
|        |         | 1.5 mg/kg | D3H66     | Pf       | Not available              | ND                   | ND                    | ND                    | ND                    | ND                  | ND                   | ND           | ND           |
|        |         | 1.5 mg/kg | D7        | NEGATIVE | Not available              | ND                   | ND                    | ND                    | ND                    | ND                  | ND                   | ND           | ND           |
|        |         | 1.5 mg/kg | D14       | NEGATIVE | Not available              | ND                   | ND                    | ND                    | ND                    | ND                  | ND                   | ND           | ND           |
|        |         | 1.5 mg/kg | SCREENING | Pf       | 97290                      | ND                   | ND                    | ND                    | ND                    | ND                  | ND                   | ND           | ND           |
|        |         | 1.5 mg/kg | D1H0      | Pf       | 197400                     | 71                   | 25                    | 4                     | 0                     | 0                   | 0                    | 0            | 0            |
|        |         | 1.5 mg/kg | D1H0:30   | Pf       | 193200                     | 79                   | 18                    | 3                     | 0                     | 0                   | 0                    | 0            | 0            |
|        |         | 1.5 mg/kg | D1H1      | Pf       | 180600                     | 71                   | 25                    | 2                     | 1                     | 0                   | 0                    | 0            | 1            |
|        |         | 1.5 mg/kg | D1H1:30   | Pf       | 193200                     | 70                   | 18                    | 6                     | 6                     | 0                   | 0                    | 0            | 0            |
|        |         | 1.5 mg/kg | D2H2      | Pf       | 176400                     | 72                   | 25                    | 3                     | 0                     | 0                   | 0                    | 0            | 0            |
|        |         | 1.5 mg/kg | D1H3      | Pf       | 184800                     | 49                   | 39                    | 11                    | 1                     | 0                   | 0                    | 0            | 0            |
|        |         | 1.5 mg/kg | D1H4      | Pf       | 184800                     | 17                   | 43                    | 26                    | 14                    | 0                   | 0                    | 0            | 0            |
|        |         | 1.5 mg/kg | D1H6      | Pf       | 168000                     | 55                   | 30                    | 8                     | 7                     | 0                   | 0                    | 0            | 0            |
|        |         | 1.5 mg/kg | D1H8      | Pf       | 151200                     | 32                   | 52                    | 15                    | 1                     | 0                   | 0                    | 0            | 0            |
|        |         | 1.5 mg/kg | D1H10     | Pf       | 168000                     | 57                   | 26                    | 10                    | 7                     | 0                   | 0                    | 0            | 0            |
|        |         | 1.5 mg/kg | D1H12     | Pf       | 155400                     | 12                   | 40                    | 33                    | 15                    | 0                   | 0                    | 0            | 0            |
|        |         | 1.5 mg/kg | D1H18     | Pf       | 155400                     | 8                    | 35                    | 26                    | 31                    | 0                   | 0                    | 0            | 0            |
|        |         | 1.5 mg/kg | D2H24     | Pf       | 70000                      | 3                    | 22                    | 28                    | 47                    | 0                   | 0                    | 0            | 0            |
|        |         | 1.5 mg/kg | D2H30     | Pf       | 56000                      | ND                   | ND                    | ND                    | ND                    | ND                  | ND                   | ND           | ND           |
|        |         | 1.5 mg/kg | D2H36     | Pf       | 13170.5                    | ND                   | ND                    | ND                    | ND                    | ND                  | ND                   | ND           | ND           |
|        |         | 1.5 mg/kg | D2H42     | Pf       | 9990.5                     | ND                   | ND                    | ND                    | ND                    | ND                  | ND                   | ND           | ND           |

## TSM02 Individual subject listings part 1

## CSR Appendix 16.2

| SUBJID | INITIAL | ARM       | TIMEPOINT | SPECIES  | PARASITAEMIA<br>( $\mu$ L) | Tiny<br>Rings<br>(%) | Small<br>Rings<br>(%) | Large<br>Rings<br>(%) | Early<br>Troph<br>(%) | Mid<br>Troph<br>(%) | Late<br>Troph<br>(%) | Gamet<br>(%) | Schiz<br>(%) |
|--------|---------|-----------|-----------|----------|----------------------------|----------------------|-----------------------|-----------------------|-----------------------|---------------------|----------------------|--------------|--------------|
|        |         | 1.5 mg/kg | D3H48     | Pf       | 1827                       | ND                   | ND                    | ND                    | ND                    | ND                  | ND                   | ND           | ND           |
|        |         | 1.5 mg/kg | D3H54     | Pf       | 1596                       | ND                   | ND                    | ND                    | ND                    | ND                  | ND                   | ND           | ND           |
|        |         | 1.5 mg/kg | D3H60     | Pf       | 525                        | ND                   | ND                    | ND                    | ND                    | ND                  | ND                   | ND           | ND           |
|        |         | 1.5 mg/kg | D3H66     | Pf       | 105                        | ND                   | ND                    | ND                    | ND                    | ND                  | ND                   | ND           | ND           |
|        |         | 1.5 mg/kg | D4H72     | Pf       | 60                         | ND                   | ND                    | ND                    | ND                    | ND                  | ND                   | ND           | ND           |
|        |         | 1.5 mg/kg | D7        | NEGATIVE | Not available              | ND                   | ND                    | ND                    | ND                    | ND                  | ND                   | ND           | ND           |
|        |         | 1.5 mg/kg | D14       | NEGATIVE | Not available              | ND                   | ND                    | ND                    | ND                    | ND                  | ND                   | ND           | ND           |
|        |         | 1.5 mg/kg | SCREENING | Pf       | 95000                      | 90                   | 8                     | 2                     | 0                     | 0                   | 0                    | 0            | 0            |
|        |         | 1.5 mg/kg | D1H0      | Pf       | 152000                     | 84                   | 14                    | 2                     | 0                     | 0                   | 0                    | 0            | 0            |
|        |         | 1.5 mg/kg | D1H0:30   | Pf       | 133000                     | 65                   | 30                    | 4                     | 1                     | 0                   | 0                    | 0            | 0            |
|        |         | 1.5 mg/kg | D1H1      | Pf       | 161500                     | 57                   | 36                    | 5                     | 2                     | 0                   | 0                    | 0            | 0            |
|        |         | 1.5 mg/kg | D1H1:30   | Pf       | 171000                     | 44                   | 38                    | 8                     | 10                    | 0                   | 0                    | 0            | 0            |
|        |         | 1.5 mg/kg | D2H2      | Pf       | 137750                     | 47                   | 41                    | 8                     | 4                     | 0                   | 0                    | 0            | 0            |
|        |         | 1.5 mg/kg | D1H3      | Pf       | 128250                     | 42                   | 39                    | 12                    | 7                     | 0                   | 0                    | 0            | 0            |
|        |         | 1.5 mg/kg | D1H4      | Pf       | 104500                     | 64                   | 22                    | 5                     | 9                     | 0                   | 0                    | 0            | 0            |
|        |         | 1.5 mg/kg | D1H6      | Pf       | 109250                     | ND                   | ND                    | ND                    | ND                    | ND                  | ND                   | ND           | ND           |
|        |         | 1.5 mg/kg | D1H8      | Pf       | 114000                     | 63                   | 17                    | 9                     | 11                    | 0                   | 0                    | 0            | 0            |
|        |         | 1.5 mg/kg | D1H10     | Pf       | 114000                     | 57                   | 29                    | 6                     | 8                     | 0                   | 0                    | 0            | 0            |
|        |         | 1.5 mg/kg | D1H12     | Pf       | 114000                     | 34                   | 23                    | 16                    | 27                    | 0                   | 0                    | 0            | 0            |
|        |         | 1.5 mg/kg | D1H18     | Pf       | 76000                      | 17                   | 33                    | 8                     | 42                    | 0                   | 0                    | 0            | 0            |
|        |         | 1.5 mg/kg | D2H24     | Pf       | 60000                      | 15                   | 17                    | 22                    | 46                    | 0                   | 0                    | 0            | 0            |
|        |         | 1.5 mg/kg | D2H30     | Pf       | 36000                      | ND                   | ND                    | ND                    | ND                    | ND                  | ND                   | ND           | ND           |

## TSM02 Individual subject listings part 1

## CSR Appendix 16.2

| SUBJID | INITIAL | ARM       | TIMEPOINT | SPECIES  | PARASITAEMIA<br>( $\mu$ L) | Tiny<br>Rings<br>(%) | Small<br>Rings<br>(%) | Large<br>Rings<br>(%) | Early<br>Troph<br>(%) | Mid<br>Troph<br>(%) | Late<br>Troph<br>(%) | Gamet<br>(%) | Schiz<br>(%) |
|--------|---------|-----------|-----------|----------|----------------------------|----------------------|-----------------------|-----------------------|-----------------------|---------------------|----------------------|--------------|--------------|
|        |         | 1.5 mg/kg | D2H36     | Pf       | 10464                      | ND                   | ND                    | ND                    | ND                    | ND                  | ND                   | ND           | ND           |
|        |         | 1.5 mg/kg | D2H42     | Pf       | 8128                       | ND                   | ND                    | ND                    | ND                    | ND                  | ND                   | ND           | ND           |
|        |         | 1.5 mg/kg | D3H48     | Pf       | 4050                       | ND                   | ND                    | ND                    | ND                    | ND                  | ND                   | ND           | ND           |
|        |         | 1.5 mg/kg | D3H54     | Pf       | 2760                       | ND                   | ND                    | ND                    | ND                    | ND                  | ND                   | ND           | ND           |
|        |         | 1.5 mg/kg | D3H60     | Pf       | 960                        | ND                   | ND                    | ND                    | ND                    | ND                  | ND                   | ND           | ND           |
|        |         | 1.5 mg/kg | D3H66     | Pf       | 720                        | ND                   | ND                    | ND                    | ND                    | ND                  | ND                   | ND           | ND           |
|        |         | 1.5 mg/kg | D4H72     | Pf       | 60                         | ND                   | ND                    | ND                    | ND                    | ND                  | ND                   | ND           | ND           |
|        |         | 1.5 mg/kg | D7        | NEGATIVE | Not available              | ND                   | ND                    | ND                    | ND                    | ND                  | ND                   | ND           | ND           |
|        |         | 1.5 mg/kg | D14       | NEGATIVE | Not available              | ND                   | ND                    | ND                    | ND                    | ND                  | ND                   | ND           | ND           |
|        |         | 3 mg/kg   | SCREENING | Pf       | 71400                      | ND                   | ND                    | ND                    | ND                    | ND                  | ND                   | ND           | ND           |
|        |         | 3 mg/kg   | D1H0      | Pf       | 65450                      | 60                   | 39                    | 1                     | 0                     | 0                   | 0                    | 0            | 0            |
|        |         | 3 mg/kg   | D1H0:30   | Pf       | 59500                      | 56                   | 43                    | 1                     | 0                     | 0                   | 0                    | 0            | 0            |
|        |         | 3 mg/kg   | D1H1      | Pf       | 83300                      | 52                   | 43                    | 5                     | 0                     | 0                   | 0                    | 0            | 0            |
|        |         | 3 mg/kg   | D1H1:30   | Pf       | 95200                      | 45                   | 47                    | 8                     | 0                     | 0                   | 0                    | 0            | 0            |
|        |         | 3 mg/kg   | D2H2      | Pf       | 89250                      | 18                   | 43                    | 26                    | 13                    | 0                   | 0                    | 0            | 0            |
|        |         | 3 mg/kg   | D1H3      | Pf       | 77350                      | 63                   | 34                    | 2                     | 1                     | 0                   | 0                    | 0            | 0            |
|        |         | 3 mg/kg   | D1H4      | Pf       | 47600                      | 36                   | 46                    | 10                    | 8                     | 0                   | 0                    | 0            | 0            |
|        |         | 3 mg/kg   | D1H6      | Pf       | 64900                      | 13                   | 40                    | 16                    | 31                    | 0                   | 0                    | 0            | 0            |
|        |         | 3 mg/kg   | D1H8      | Pf       | 41650                      | 24                   | 29                    | 22                    | 25                    | 0                   | 0                    | 0            | 0            |
|        |         | 3 mg/kg   | D1H10     | Pf       | 29750                      | 6                    | 25                    | 22                    | 47                    | 0                   | 0                    | 0            | 0            |
|        |         | 3 mg/kg   | D1H12     | Pf       | 35400                      | 4                    | 17                    | 22                    | 56                    | 1                   | 0                    | 0            | 0            |
|        |         | 3 mg/kg   | D1H18     | Pf       | 53550                      | 0                    | 12                    | 28                    | 57                    | 3                   | 0                    | 0            | 0            |

## TSM02 Individual subject listings part 1

## CSR Appendix 16.2

| SUBJID | INITIAL | ARM     | TIMEPOINT | SPECIES  | PARASITAEMIA<br>( $\mu$ L) | Tiny<br>Rings<br>(%) | Small<br>Rings<br>(%) | Large<br>Rings<br>(%) | Early<br>Troph<br>(%) | Mid<br>Troph<br>(%) | Late<br>Troph<br>(%) | Gamet<br>(%) | Schiz<br>(%) |
|--------|---------|---------|-----------|----------|----------------------------|----------------------|-----------------------|-----------------------|-----------------------|---------------------|----------------------|--------------|--------------|
|        |         | 3 mg/kg | D2H24     | Pf       | 8169                       | 0                    | 8                     | 22                    | 61                    | 9                   | 0                    | 0            | 0            |
|        |         | 3 mg/kg | D2H30     | Pf       | 2434                       | ND                   | ND                    | ND                    | ND                    | ND                  | ND                   | ND           | ND           |
|        |         | 3 mg/kg | D2H36     | Pf       | 1116                       | ND                   | ND                    | ND                    | ND                    | ND                  | ND                   | ND           | ND           |
|        |         | 3 mg/kg | D2H42     | Pf       | 620                        | ND                   | ND                    | ND                    | ND                    | ND                  | ND                   | ND           | ND           |
|        |         | 3 mg/kg | D3H48     | Pf       | 216                        | ND                   | ND                    | ND                    | ND                    | ND                  | ND                   | ND           | ND           |
|        |         | 3 mg/kg | D3H54     | Pf       | 108                        | ND                   | ND                    | ND                    | ND                    | ND                  | ND                   | ND           | ND           |
|        |         | 3 mg/kg | D3H60     | Pf       | 72                         | ND                   | ND                    | ND                    | ND                    | ND                  | ND                   | ND           | ND           |
|        |         | 3 mg/kg | D3H66     | Pf       | 36                         | ND                   | ND                    | ND                    | ND                    | ND                  | ND                   | ND           | ND           |
|        |         | 3 mg/kg | D4H72     | NEGATIVE | Not available              | ND                   | ND                    | ND                    | ND                    | ND                  | ND                   | ND           | ND           |
|        |         | 3 mg/kg | D7        | NEGATIVE | Not available              | ND                   | ND                    | ND                    | ND                    | ND                  | ND                   | ND           | ND           |
|        |         | 3 mg/kg | D14       | NEGATIVE | Not available              | ND                   | ND                    | ND                    | ND                    | ND                  | ND                   | ND           | ND           |
|        |         | 3 mg/kg | SCREENING | Pf       | 38000                      | ND                   | ND                    | ND                    | ND                    | ND                  | ND                   | ND           | ND           |
|        |         | 3 mg/kg | D1H0      | Pf       | 34047                      | 67                   | 23                    | 7                     | 2                     | 0                   | 0                    | 1            | 0            |
|        |         | 3 mg/kg | D1H0:30   | Pf       | 20547                      | 45                   | 42                    | 8                     | 5                     | 0                   | 0                    | 0            | 0            |
|        |         | 3 mg/kg | D1H1      | Pf       | 30996                      | 46                   | 34                    | 13                    | 7                     | 0                   | 0                    | 0            | 0            |
|        |         | 3 mg/kg | D1H1:30   | Pf       | 25326                      | 37                   | 44                    | 10                    | 8                     | 0                   | 0                    | 1            | 0            |
|        |         | 3 mg/kg | D2H2      | Pf       | 28863                      | 45                   | 31                    | 12                    | 12                    | 0                   | 0                    | 0            | 0            |
|        |         | 3 mg/kg | D1H3      | Pf       | 44631                      | 14                   | 49                    | 25                    | 12                    | 0                   | 0                    | 0            | 0            |
|        |         | 3 mg/kg | D1H4      | Pf       | 52731                      | 12                   | 50                    | 20                    | 18                    | 0                   | 0                    | 0            | 0            |
|        |         | 3 mg/kg | D1H6      | Pf       | 37422                      | 14                   | 33                    | 16                    | 37                    | 0                   | 0                    | 0            | 0            |
|        |         | 3 mg/kg | D1H8      | Pf       | 29727                      | 12                   | 32                    | 14                    | 42                    | 0                   | 0                    | 0            | 0            |
|        |         | 3 mg/kg | D1H10     | Pf       | 29889                      | 18                   | 35                    | 22                    | 24                    | 0                   | 0                    | 1            | 0            |

## TSM02 Individual subject listings part 1

## CSR Appendix 16.2

| SUBJID | INITIAL | ARM     | TIMEPOINT | SPECIES  | PARASITAEMIA<br>( $\mu$ L) | Tiny<br>Rings<br>(%) | Small<br>Rings<br>(%) | Large<br>Rings<br>(%) | Early<br>Troph<br>(%) | Mid<br>Troph<br>(%) | Late<br>Troph<br>(%) | Gamet<br>(%) | Schiz<br>(%) |
|--------|---------|---------|-----------|----------|----------------------------|----------------------|-----------------------|-----------------------|-----------------------|---------------------|----------------------|--------------|--------------|
|        |         | 3 mg/kg | D1H12     | Pf       | 37530                      | 1                    | 23                    | 34                    | 41                    | 0                   | 0                    | 1            | 0            |
|        |         | 3 mg/kg | D1H18     | Pf       | 19764                      | 0                    | 9                     | 22                    | 67                    | 1                   | 0                    | 1            | 0            |
|        |         | 3 mg/kg | D2H24     | Pf       | 16816                      | 0                    | 2                     | 17                    | 76                    | 5                   | 0                    | 0            | 0            |
|        |         | 3 mg/kg | D2H30     | Pf       | 6064                       | ND                   | ND                    | ND                    | ND                    | ND                  | ND                   | ND           | ND           |
|        |         | 3 mg/kg | D2H36     | Pf       | 832                        | ND                   | ND                    | ND                    | ND                    | ND                  | ND                   | ND           | ND           |
|        |         | 3 mg/kg | D2H42     | Pf       | 176                        | ND                   | ND                    | ND                    | ND                    | ND                  | ND                   | ND           | ND           |
|        |         | 3 mg/kg | D3H48     | Pf       | 34                         | ND                   | ND                    | ND                    | ND                    | ND                  | ND                   | ND           | ND           |
|        |         | 3 mg/kg | D3H54     | Pf       | 51                         | ND                   | ND                    | ND                    | ND                    | ND                  | ND                   | ND           | ND           |
|        |         | 3 mg/kg | D3H60     | Pf       | 17                         | ND                   | ND                    | ND                    | ND                    | ND                  | ND                   | ND           | ND           |
|        |         | 3 mg/kg | D3H66     | NEGATIVE | Not available              | ND                   | ND                    | ND                    | ND                    | ND                  | ND                   | ND           | ND           |
|        |         | 3 mg/kg | D4H72     | NEGATIVE | Not available              | ND                   | ND                    | ND                    | ND                    | ND                  | ND                   | ND           | ND           |
|        |         | 3 mg/kg | D7        | NEGATIVE | Not available              | ND                   | ND                    | ND                    | ND                    | ND                  | ND                   | ND           | ND           |
|        |         | 3 mg/kg | D14       | NEGATIVE | Not available              | ND                   | ND                    | ND                    | ND                    | ND                  | ND                   | ND           | ND           |
|        |         | 3 mg/kg | SCREENING | Pf       | 10200                      | 0                    | 7                     | 13                    | 60                    | 20                  | 0                    | 0            | 0            |
|        |         | 3 mg/kg | D1H0      | Pf       | 882                        | 0                    | 14                    | 36                    | 32                    | 18                  | 0                    | 0            | 0            |
|        |         | 3 mg/kg | D1H0:30   | Pf       | 924                        | 18                   | 32                    | 20                    | 22                    | 6                   | 2                    | 0            | 0            |
|        |         | 3 mg/kg | D1H1      | Pf       | 462                        | 6                    | 40                    | 20                    | 30                    | 4                   | 0                    | 0            | 0            |
|        |         | 3 mg/kg | D1H1:30   | Pf       | 420                        | 12                   | 36                    | 20                    | 20                    | 12                  | 0                    | 0            | 0            |
|        |         | 3 mg/kg | D2H2      | Pf       | 420                        | 6                    | 32                    | 26                    | 28                    | 8                   | 0                    | 0            | 0            |
|        |         | 3 mg/kg | D1H3      | Pf       | 210                        | 2                    | 28                    | 34                    | 30                    | 6                   | 0                    | 0            | 0            |
|        |         | 3 mg/kg | D1H4      | Pf       | 126                        | 16                   | 26                    | 26                    | 32                    | 0                   | 0                    | 0            | 0            |
|        |         | 3 mg/kg | D1H6      | Pf       | 462                        | ND                   | ND                    | ND                    | ND                    | ND                  | ND                   | ND           | ND           |

## TSM02 Individual subject listings part 1

## CSR Appendix 16.2

| SUBJID | INITIAL | ARM     | TIMEPOINT | SPECIES  | PARASITAEMIA<br>( $\mu$ L) | Tiny<br>Rings<br>(%) | Small<br>Rings<br>(%) | Large<br>Rings<br>(%) | Early<br>Troph<br>(%) | Mid<br>Troph<br>(%) | Late<br>Troph<br>(%) | Gamet<br>(%) | Schiz<br>(%) |
|--------|---------|---------|-----------|----------|----------------------------|----------------------|-----------------------|-----------------------|-----------------------|---------------------|----------------------|--------------|--------------|
|        |         | 3 mg/kg | D1H8      | Pf       | 378                        | ND                   | ND                    | ND                    | ND                    | ND                  | ND                   | ND           | ND           |
|        |         | 3 mg/kg | D1H10     | Pf       | 210                        | ND                   | ND                    | ND                    | ND                    | ND                  | ND                   | ND           | ND           |
|        |         | 3 mg/kg | D1H12     | Pf       | 84                         | ND                   | ND                    | ND                    | ND                    | ND                  | ND                   | ND           | ND           |
|        |         | 3 mg/kg | D1H18     | NEGATIVE | Not available              | ND                   | ND                    | ND                    | ND                    | ND                  | ND                   | ND           | ND           |
|        |         | 3 mg/kg | D2H24     | Pf       | 38                         | ND                   | ND                    | ND                    | ND                    | ND                  | ND                   | ND           | ND           |
|        |         | 3 mg/kg | D2H30     | Pf       | 152                        | ND                   | ND                    | ND                    | ND                    | ND                  | ND                   | ND           | ND           |
|        |         | 3 mg/kg | D2H36     | Pf       | 76                         | ND                   | ND                    | ND                    | ND                    | ND                  | ND                   | ND           | ND           |
|        |         | 3 mg/kg | D2H42     | NEGATIVE | Not available              | ND                   | ND                    | ND                    | ND                    | ND                  | ND                   | ND           | ND           |
|        |         | 3 mg/kg | D3H48     | NEGATIVE | Not available              | ND                   | ND                    | ND                    | ND                    | ND                  | ND                   | ND           | ND           |
|        |         | 3 mg/kg | D3H54     | NEGATIVE | Not available              | ND                   | ND                    | ND                    | ND                    | ND                  | ND                   | ND           | ND           |
|        |         | 3 mg/kg | D3H60     | NEGATIVE | Not available              | ND                   | ND                    | ND                    | ND                    | ND                  | ND                   | ND           | ND           |
|        |         | 3 mg/kg | D3H66     | NEGATIVE | Not available              | ND                   | ND                    | ND                    | ND                    | ND                  | ND                   | ND           | ND           |
|        |         | 3 mg/kg | D7        | NEGATIVE | Not available              | ND                   | ND                    | ND                    | ND                    | ND                  | ND                   | ND           | ND           |
|        |         | 3 mg/kg | D14       | NEGATIVE | Not available              | ND                   | ND                    | ND                    | ND                    | ND                  | ND                   | ND           | ND           |
|        |         | 6 mg/kg | SCREENING | Pf       | 86700                      | 1                    | 18                    | 34                    | 47                    | 0                   | 0                    | 0            | 0            |
|        |         | 6 mg/kg | D1H0      | Pf       | 51000                      | 8                    | 24                    | 20                    | 46                    | 2                   | 0                    | 0            | 0            |
|        |         | 6 mg/kg | D1H0:30   | Pf       | 61200                      | 20                   | 26                    | 9                     | 36                    | 8                   | 1                    | 0            | 0            |
|        |         | 6 mg/kg | D1H1      | Pf       | 51000                      | 22                   | 17                    | 11                    | 35                    | 11                  | 4                    | 0            | 0            |
|        |         | 6 mg/kg | D1H1:30   | Pf       | 45900                      | ND                   | ND                    | ND                    | ND                    | ND                  | ND                   | ND           | ND           |
|        |         | 6 mg/kg | D2H2      | Pf       | 35700                      | 40                   | 21                    | 8                     | 26                    | 5                   | 0                    | 0            | 0            |
|        |         | 6 mg/kg | D1H3      | Pf       | 35700                      | 40                   | 31                    | 7                     | 16                    | 6                   | 0                    | 0            | 0            |
|        |         | 6 mg/kg | D1H4      | Pf       | 30600                      | 50                   | 34                    | 6                     | 10                    | 0                   | 0                    | 0            | 0            |



## TSM02 Individual subject listings part 1

## CSR Appendix 16.2

| SUBJID | INITIAL | ARM     | TIMEPOINT | SPECIES  | PARASITAEMIA<br>( $\mu$ L) | Tiny<br>Rings<br>(%) | Small<br>Rings<br>(%) | Large<br>Rings<br>(%) | Early<br>Troph<br>(%) | Mid<br>Troph<br>(%) | Late<br>Troph<br>(%) | Gamet<br>(%) | Schiz<br>(%) |
|--------|---------|---------|-----------|----------|----------------------------|----------------------|-----------------------|-----------------------|-----------------------|---------------------|----------------------|--------------|--------------|
|        |         | 6 mg/kg | D1H6      | Pf       | 25500                      | 5                    | 36                    | 42                    | 15                    | 2                   | 0                    | 0            | 0            |
|        |         | 6 mg/kg | D1H8      | Pf       | 15300                      | 19                   | 38                    | 20                    | 22                    | 1                   | 0                    | 0            | 0            |
|        |         | 6 mg/kg | D1H10     | Pf       | 10200                      | 1                    | 31                    | 32                    | 36                    | 0                   | 0                    | 0            | 0            |
|        |         | 6 mg/kg | D1H12     | Pf       | 9590                       | 1                    | 20                    | 36                    | 42                    | 0                   | 1                    | 0            | 0            |
|        |         | 6 mg/kg | D1H18     | Pf       | 5845                       | 4                    | 22                    | 28                    | 46                    | 0                   | 0                    | 0            | 0            |
|        |         | 6 mg/kg | D2H24     | Pf       | 1230                       | 0                    | 8                     | 36                    | 52                    | 0                   | 4                    | 0            | 0            |
|        |         | 6 mg/kg | D2H30     | Pf       | 1650                       | ND                   | ND                    | ND                    | ND                    | ND                  | ND                   | ND           | ND           |
|        |         | 6 mg/kg | D2H36     | Pf       | 360                        | ND                   | ND                    | ND                    | ND                    | ND                  | ND                   | ND           | ND           |
|        |         | 6 mg/kg | D2H42     | Pf       | 60                         | ND                   | ND                    | ND                    | ND                    | ND                  | ND                   | ND           | ND           |
|        |         | 6 mg/kg | D3H48     | Pf       | 12                         | ND                   | ND                    | ND                    | ND                    | ND                  | ND                   | ND           | ND           |
|        |         | 6 mg/kg | D3H54     | NEGATIVE | 0                          | ND                   | ND                    | ND                    | ND                    | ND                  | ND                   | ND           | ND           |
|        |         | 6 mg/kg | D3H60     | NEGATIVE | 0                          | ND                   | ND                    | ND                    | ND                    | ND                  | ND                   | ND           | ND           |
|        |         | 6 mg/kg | D3H66     | NEGATIVE | 0                          | ND                   | ND                    | ND                    | ND                    | ND                  | ND                   | ND           | ND           |
|        |         | 6 mg/kg | D7        | NEGATIVE | Not available              | ND                   | ND                    | ND                    | ND                    | ND                  | ND                   | ND           | ND           |
|        |         | 6 mg/kg | D14       | NEGATIVE | Not available              | ND                   | ND                    | ND                    | ND                    | ND                  | ND                   | ND           | ND           |
|        |         | 6 mg/kg | SCREENING | Pf       | 33360                      | ND                   | ND                    | ND                    | ND                    | ND                  | ND                   | ND           | ND           |
|        |         | 6 mg/kg | D1H0      | Pf       | 68200                      | 23                   | 43                    | 27                    | 7                     | 0                   | 0                    | 0            | 0            |
|        |         | 6 mg/kg | D1H0:30   | Pf       | 62000                      | 17                   | 54                    | 20                    | 9                     | 0                   | 0                    | 0            | 0            |
|        |         | 6 mg/kg | D1H1      | Pf       | 55800                      | 20                   | 45                    | 28                    | 7                     | 0                   | 0                    | 0            | 0            |
|        |         | 6 mg/kg | D1H1:30   | Pf       | 19600                      | 6                    | 59                    | 25                    | 10                    | 0                   | 0                    | 0            | 0            |
|        |         | 6 mg/kg | D2H2      | Pf       | 49600                      | 6                    | 49                    | 34                    | 11                    | 0                   | 0                    | 0            | 0            |
|        |         | 6 mg/kg | D1H3      | Pf       | 43400                      | 32                   | 29                    | 17                    | 21                    | 1                   | 0                    | 0            | 0            |

## TSM02 Individual subject listings part 1

## CSR Appendix 16.2

| SUBJID | INITIAL | ARM     | TIMEPOINT | SPECIES  | PARASITAEMIA<br>( $\mu$ L) | Tiny<br>Rings<br>(%) | Small<br>Rings<br>(%) | Large<br>Rings<br>(%) | Early<br>Troph<br>(%) | Mid<br>Troph<br>(%) | Late<br>Troph<br>(%) | Gamet<br>(%) | Schiz<br>(%) |
|--------|---------|---------|-----------|----------|----------------------------|----------------------|-----------------------|-----------------------|-----------------------|---------------------|----------------------|--------------|--------------|
|        |         | 6 mg/kg | D1H4      | Pf       | 37200                      | 10                   | 58                    | 12                    | 20                    | 0                   | 0                    | 0            | 0            |
|        |         | 6 mg/kg | D1H6      | Pf       | 24800                      | 9                    | 49                    | 27                    | 15                    | 0                   | 0                    | 0            | 0            |
|        |         | 6 mg/kg | D1H8      | Pf       | Not available              | 3                    | 25                    | 36                    | 36                    | 0                   | 0                    | 0            | 0            |
|        |         | 6 mg/kg | D1H10     | Pf       | 18600                      | 2                    | 23                    | 29                    | 46                    | 0                   | 0                    | 0            | 0            |
|        |         | 6 mg/kg | D1H12     | Pf       | 40320                      | 4                    | 19                    | 20                    | 57                    | 0                   | 0                    | 0            | 0            |
|        |         | 6 mg/kg | D1H18     | Pf       | 38352                      | 1                    | 2                     | 23                    | 71                    | 3                   | 0                    | 0            | 0            |
|        |         | 6 mg/kg | D2H24     | Pf       | 16470                      | 1                    | 2                     | 23                    | 73                    | 1                   | 0                    | 0            | 0            |
|        |         | 6 mg/kg | D2H30     | Pf       | 9058                       | ND                   | ND                    | ND                    | ND                    | ND                  | ND                   | ND           | ND           |
|        |         | 6 mg/kg | D2H36     | Pf       | 2836                       | ND                   | ND                    | ND                    | ND                    | ND                  | ND                   | ND           | ND           |
|        |         | 6 mg/kg | D2H42     | Pf       | 3355                       | ND                   | ND                    | ND                    | ND                    | ND                  | ND                   | ND           | ND           |
|        |         | 6 mg/kg | D3H48     | Pf       | 130                        | ND                   | ND                    | ND                    | ND                    | ND                  | ND                   | ND           | ND           |
|        |         | 6 mg/kg | D3H54     | Pf       | 13                         | ND                   | ND                    | ND                    | ND                    | ND                  | ND                   | ND           | ND           |
|        |         | 6 mg/kg | D3H60     | NEGATIVE | Not available              | ND                   | ND                    | ND                    | ND                    | ND                  | ND                   | ND           | ND           |
|        |         | 6 mg/kg | D3H66     | NEGATIVE | Not available              | ND                   | ND                    | ND                    | ND                    | ND                  | ND                   | ND           | ND           |
|        |         | 6 mg/kg | D7        | NEGATIVE | Not available              | ND                   | ND                    | ND                    | ND                    | ND                  | ND                   | ND           | ND           |
|        |         | 6 mg/kg | D14       | NEGATIVE | Not available              | ND                   | ND                    | ND                    | ND                    | ND                  | ND                   | ND           | ND           |
|        |         | 6 mg/kg | SCREENING | Pf       | 20020                      | ND                   | ND                    | ND                    | ND                    | ND                  | ND                   | ND           | ND           |
|        |         | 6 mg/kg | D1H0      | Pf       | 20817                      | 59                   | 32                    | 5                     | 4                     | 0                   | 0                    | 0            | 0            |
|        |         | 6 mg/kg | D1H0:30   | Pf       | 16417                      | 63                   | 26                    | 5                     | 5                     | 1                   | 0                    | 0            | 0            |
|        |         | 6 mg/kg | D1H1      | Pf       | 17187                      | 49                   | 40                    | 8                     | 2                     | 1                   | 0                    | 0            | 0            |
|        |         | 6 mg/kg | D1H1:30   | Pf       | 17407                      | 49                   | 37                    | 10                    | 4                     | 0                   | 0                    | 0            | 0            |
|        |         | 6 mg/kg | D2H2      | Pf       | 17710                      | 40                   | 42                    | 14                    | 4                     | 0                   | 0                    | 0            | 0            |

## TSM02 Individual subject listings part 1

## CSR Appendix 16.2

| SUBJID | INITIAL | ARM     | TIMEPOINT | SPECIES  | PARASITAEMIA<br>( $\mu$ L) | Tiny<br>Rings<br>(%) | Small<br>Rings<br>(%) | Large<br>Rings<br>(%) | Early<br>Troph<br>(%) | Mid<br>Troph<br>(%) | Late<br>Troph<br>(%) | Gamet<br>(%) | Schiz<br>(%) |
|--------|---------|---------|-----------|----------|----------------------------|----------------------|-----------------------|-----------------------|-----------------------|---------------------|----------------------|--------------|--------------|
|        |         | 6 mg/kg | D1H3      | Pf       | 23127                      | 7                    | 47                    | 26                    | 19                    | 1                   | 0                    | 0            | 0            |
|        |         | 6 mg/kg | D1H4      | Pf       | 24365                      | 10                   | 39                    | 31                    | 20                    | 0                   | 0                    | 0            | 0            |
|        |         | 6 mg/kg | D1H6      | Pf       | 26922                      | 9                    | 53                    | 24                    | 12                    | 1                   | 0                    | 1            | 0            |
|        |         | 6 mg/kg | D1H8      | Pf       | 13997                      | 13                   | 40                    | 37                    | 10                    | 0                   | 0                    | 0            | 0            |
|        |         | 6 mg/kg | D1H10     | Pf       | 21862                      | 0                    | 42                    | 36                    | 21                    | 0                   | 0                    | 1            | 0            |
|        |         | 6 mg/kg | D1H12     | Pf       | 19057                      | 10                   | 5                     | 35                    | 45                    | 5                   | 0                    | 0            | 0            |
|        |         | 6 mg/kg | D1H18     | Pf       | 16637                      | 1                    | 10                    | 19                    | 59                    | 9                   | 2                    | 0            | 0            |
|        |         | 6 mg/kg | D2H24     | Pf       | 8500                       | 4                    | 4                     | 18                    | 72                    | 2                   | 0                    | 0            | 0            |
|        |         | 6 mg/kg | D2H30     | Pf       | 7900                       | ND                   | ND                    | ND                    | ND                    | ND                  | ND                   | ND           | ND           |
|        |         | 6 mg/kg | D2H36     | Pf       | 1020                       | ND                   | ND                    | ND                    | ND                    | ND                  | ND                   | ND           | ND           |
|        |         | 6 mg/kg | D2H42     | Pf       | 160                        | ND                   | ND                    | ND                    | ND                    | ND                  | ND                   | ND           | ND           |
|        |         | 6 mg/kg | D3H48     | Pf       | 9                          | ND                   | ND                    | ND                    | ND                    | ND                  | ND                   | ND           | ND           |
|        |         | 6 mg/kg | D3H54     | NEGATIVE | 0                          | ND                   | ND                    | ND                    | ND                    | ND                  | ND                   | ND           | ND           |
|        |         | 6 mg/kg | D3H60     | NEGATIVE | 0                          | ND                   | ND                    | ND                    | ND                    | ND                  | ND                   | ND           | ND           |
|        |         | 6 mg/kg | D7        | NEGATIVE | 0                          | ND                   | ND                    | ND                    | ND                    | ND                  | ND                   | ND           | ND           |
|        |         | 6 mg/kg | D14       | NEGATIVE | 0                          | ND                   | ND                    | ND                    | ND                    | ND                  | ND                   | ND           | ND           |

TSM02 Individual subject listings part 1

CSR Appendix 16.2

16.2.6.2 Cytoadherence, rosette assay

*To be reported later.*

## TSM02 Individual subject listings part 1

## CSR Appendix 16.2

## 16.2.7 Individual safety data

## 16.2.7.1 Adverse event listings

| SUBJ ID | INITIAL | ARM       | AE SEQ | AETERM       | AEDECOD      | AESOC                              | DESCRIPTION                                                                                                                                             | ONSET DATE TIME<br><i>99:99=UNK</i> | END DATE | OUTCOME   | INTENS | RELAT. DF02 | RELAT. MALANIL | ALT RELAT          | ALTRELOT HER              | ACTION               |
|---------|---------|-----------|--------|--------------|--------------|------------------------------------|---------------------------------------------------------------------------------------------------------------------------------------------------------|-------------------------------------|----------|-----------|--------|-------------|----------------|--------------------|---------------------------|----------------------|
|         |         | 1.5 mg/kg | 1      | VOMITING     | Vomiting     | Gastrointestinal disorders         | SHE HAD FEVER AND VOMITING WITH MILD DEHYDRATION. THE INTRAVENOUS FLUID AND METOCLOPRAMIDE (PLASIL) WERE GIVEN.                                         |                                     |          | Recovered | Mild   | Not related | Not related    | Concurrent illness | UNCOMPLI CATED PF MALARIA | Treatment Medication |
|         |         | 1.5 mg/kg | 2      | HYPOKALEMIA  | Hypokalemia  | Metabolism and nutrition disorders | HER SERUM K+=3.1mmol/L AND SERUM Ca2+ WAS 6.9mmol/L BUT NO CLINICAL SIGNIFICANT. SHE GOT 10% CALCIUM GLUCONATE 10ml IV SLOWLY PUSH AND 30ml KCl ELIXIR. |                                     |          | Recovered | Mild   | Not related | Not related    | Concurrent illness | UNCOMPLI CATED PF MALARIA | Treatment Medication |
|         |         | 1.5       | 3      | HYPOCALCEMIA | Hypocalcemia | Metabolism and nutrition disorders | HER SERUM                                                                                                                                               |                                     |          | Recovered | Mild   | Not         | Not            | Concurrent         | UNCOMPLI                  | Treatment            |

TSM02 Individual subject listings part 1

CSR Appendix 16.2

| SUBJ ID | INITIAL | ARM       | AE SEQ | AETERM   | AEDECOD  | AESOC                      | DESCRIPTION                                                                                                                                                     | ONSET DATE TIME | END DATE | OUTCOME   | INTENS | RELAT. DF02 | RELAT. MALANIL | ALT RELAT          | ALTRELOT HER      | ACTION              |
|---------|---------|-----------|--------|----------|----------|----------------------------|-----------------------------------------------------------------------------------------------------------------------------------------------------------------|-----------------|----------|-----------|--------|-------------|----------------|--------------------|-------------------|---------------------|
|         |         | mg/kg     |        | A        | emia     | m and nutrition disorders  | K+=3.1mmol/L AND SERUM Ca2+ WAS 6.9 mmol/L BUT NO CLINICAL SIGNIFICANT. SHE GOT 10% CALCIUM GLUCONATE 10 ML IV SLOWLY PUSH AND 30ML KCl ELIXIR                  | 99:99=UNK       |          |           |        | related     | related        | illness            | CATED PF MALARIA  | Medicatio           |
|         |         | 1.5 mg/kg | 1      | NAUSEA   | Nausea   | Gastrointestinal disorders | IN DAY 2, PATIENT HAS NAUSEA AND VOMITING SYMPTOM. HE DID NOT HAVE THE SYMPTOM BEFORE. I THINK THESE SYMPTOM ARE RELATED WITH PF MALARIAL INFECTION, TYPICALLY. |                 |          | Recovered | Mild   | Not related | Not related    | Concurrent illness | MALARIA INFECTION | Treatment Medicatio |
|         |         | 1.5 mg/kg | 2      | VOMITING | Vomiting | Gastrointestinal disorders | IN DAY 2, PATIENT HAS NAUSEA AND                                                                                                                                |                 |          | Recovered | Mild   | Not related | Not related    | Concurrent illness | MALARIA INFECTION | Treatment Medicatio |

TSM02 Individual subject listings part 1

CSR Appendix 16.2

| SUBJ ID | INITIAL | ARM     | AE SEQ | AETERM            | AEDECOD                                         | AESOC                              | DESCRIPTION                                                                                                                                      | ONSET DATE TIME<br><i>99:99=UNK</i> | END DATE | OUTCOME   | INTENS | RELAT. DF02      | RELAT. MALANIL   | ALT RELAT              | ALTRELOTHER           | ACTION               |  |
|---------|---------|---------|--------|-------------------|-------------------------------------------------|------------------------------------|--------------------------------------------------------------------------------------------------------------------------------------------------|-------------------------------------|----------|-----------|--------|------------------|------------------|------------------------|-----------------------|----------------------|--|
|         |         |         |        |                   |                                                 |                                    | VOMITING SYMPTOM. HE DID NOT HAVE THE SYMPTOM BEFORE. I THINK THESE SYMPTOMS ARE RELATED WITH PF MALARIA INFECTION, TYPICALLY.                   |                                     |          |           |        |                  |                  |                        |                       |                      |  |
|         |         | 3 mg/kg | 1      | HYPOCALCEMIA      | Hypocalcaemia                                   | Metabolism and nutrition disorders | LAB RESULT ON 19-DEC-2011, SERUM Ca2+ 6.7 mmol/L, NO TETANY, NO QTC PROLONGATION. HE GOT 10% CALCIUM GLUCONATE 10 ML IV SLOWLY PUSH AT 22.30 PM. |                                     |          | Recovered | Mild   | Possibly related | Possibly related | Concurrent illness     | MALARIA PF INFECTION  | Treatment Medication |  |
|         |         | 3 mg/kg | 2      | APTT PROLONGATION | Activated partial thromboplastin time prolonged | Investigations                     | THIS PATIENT HAD HYPOCALCEMIA SO HE GOT 10% CALCIUM                                                                                              |                                     |          | Recovered | Mild   | Possibly related | Possibly related | Concomitant medication | 10% CALCIUM GLUCONATE | None                 |  |

TSM02 Individual subject listings part 1

CSR Appendix 16.2

| SUBJ ID | INITIAL | ARM     | AE SEQ | AETERM        | AEDECOD                            | AESOC          | DESCRIPTION                                                                                                                                                                                 | ONSET DATE TIME<br><i>99:99=UNK</i> | END DATE | OUTCOME       | INTENS | RELAT. DF02      | RELAT. MALANIL   | ALT RELAT          | ALTRELOTHER          | ACTION          |
|---------|---------|---------|--------|---------------|------------------------------------|----------------|---------------------------------------------------------------------------------------------------------------------------------------------------------------------------------------------|-------------------------------------|----------|---------------|--------|------------------|------------------|--------------------|----------------------|-----------------|
|         |         |         |        |               |                                    |                | GLUCONATE AT 22:30. WE ALSO INVESTIGATED THE COAGULATION TEST AT 30H, THE RESULT WAS INVALID DUE TO PROLONG APTT. HIS CLINICAL WAS FINE (NO ANY AE), THE TEST WAS DONE FOLLOW THE PROTOCOL. |                                     |          |               |        |                  |                  |                    |                      |                 |
|         |         | 3 mg/kg | 3      | ALT INCREASED | Alanine aminotransferase increased | Investigations | THE FOLLOW LABORATORY AT DAY 7 IS ABNORMAL. AST=53, ALT=88, NO CLINICAL OF HEPATITIS, DENIED ALCOHOL DRINKING OR HERBAL USE.                                                                |                                     |          | Not recovered | Mild   | Possibly related | Possibly related | Concurrent illness | MALARIA PF INFECTION | Other treatment |
|         |         | 3       | 4      | ALT           | Alanine                            | Investigati    | THE                                                                                                                                                                                         |                                     |          | Not           | Mild   | Possibly         | Possibly         | Concurrent         | MALARIA              | Other           |



TSM02 Individual subject listings part 1

CSR Appendix 16.2

| SUBJ ID | INITIAL | ARM     | AE SEQ | AETERM                    | AEDECOD                    | AESOC                                       | DESCRIPTION                                                                                                                                                                                       | ONSET DATE TIME<br><i>99:99=UNK</i> | END DATE | OUTCOME   | INTENS | RELAT. DF02 | RELAT. MALANIL | ALT RELAT          | ALTRELOT HER         | ACTION               |
|---------|---------|---------|--------|---------------------------|----------------------------|---------------------------------------------|---------------------------------------------------------------------------------------------------------------------------------------------------------------------------------------------------|-------------------------------------|----------|-----------|--------|-------------|----------------|--------------------|----------------------|----------------------|
|         |         | mg/kg   |        | INCREASED                 | aminotransferase increased | ons                                         | LABORATORY AT DAY 14 IS ABNORMAL. AST=46, ALT=75 NO CLINICAL OF HEPATITIS, DENIED ALCOHOL DRINKING OR HERBAL USE.                                                                                 |                                     |          | recovered |        | related     | related        | illness            | PF INFECTION         | treatmen             |
|         |         | 3 mg/kg | 1      | ANEMIA (HEMOGLOBINOPATHY) | Haemoglobinopathy          | Congenital , familial and genetic disorders | ON D2, HCT 19.7%, HB 6.6G/DL.PERIPHERAL BLOOD SMEAR SHOWS AN ISOPOIKILOCYTOSIS +3, POSSIBLE HEMOGLOBINOPATHY. NO CLINICAL ANEMIC SYMPTOM OR HEART FAILURE. HE DENIED TO RECEIVE BLOOD TRANSFUSION |                                     |          | Recovered | Severe | Not related | Not related    | Concurrent illness | MALARIA PF INFECTION | Treatment Medication |

## TSM02 Individual subject listings part 1

## CSR Appendix 16.2

| SUBJ ID | INITIAL | ARM     | AE SEQ | AETERM            | AEDECOD                            | AESOC                                | DESCRIPTION                                                                                       | ONSET DATE TIME<br><i>99:99=UNK</i> | END DATE | OUTCOME       | INTENS   | RELAT. DF02      | RELAT. MALANIL   | ALT RELAT          | ALTRELOT HER             | ACTION               |
|---------|---------|---------|--------|-------------------|------------------------------------|--------------------------------------|---------------------------------------------------------------------------------------------------|-------------------------------------|----------|---------------|----------|------------------|------------------|--------------------|--------------------------|----------------------|
|         |         | 3 mg/kg | 2      | MILD HYPOCALCEMIA | Hypocalcaemia                      | Metabolism and nutrition disorders   | SERUM Ca <sup>2+</sup> =7.5 mmol/L, BUT NO CLINICAL SIGNIFICANT. HE GOT CALCIUM CARBONATE ORALLY. |                                     |          | Recovered     | Moderate | Possibly related | Possibly related | Concurrent illness | MALARIA PF INFECTION     | Treatment Medication |
|         |         | 3 mg/kg | 1      | VOMITING          | Vomiting                           | Gastrointestinal disorders           | HE HAD A FEVER WITH 1 TIME OF VOMITING IN THE EVENING, SO DOMPERIDON WAS GIVEN                    |                                     |          | Recovered     | Mild     | Not related      | Possibly related | Concurrent illness | UNCOMPLICATED PF MALARIA | Treatment Medication |
|         |         | 3 mg/kg | 2      | THROMBOCYTOPENIA  | Thrombocytopenia                   | Blood and lymphatic system disorders | LAB RESULT: PLATELET 66,000 NO CLINICAL BLEEDING, NO PETECHIAE                                    |                                     |          | Recovered     | Moderate | Not related      | Not related      | Concurrent illness | MALARIA PF INFECTION     | None                 |
|         |         | 3 mg/kg | 3      | ALT INCREASED     | Alanine aminotransferase increased | Investigations                       | HE HAS ABNORMAL LABORATORY RESULT IN DAY 7 FOLLOW UP. AST = 87, ACT = 104 NO CLINICAL OF          |                                     |          | Not recovered | Mild     | Possibly related | Possibly related | Concurrent illness | MALARIA PF INFECTION     | None                 |

TSM02 Individual subject listings part 1

CSR Appendix 16.2

| SUBJ ID | INITIAL | ARM     | AE SEQ | AETERM         | AEDECOD                              | AESOC          | DESCRIPTION                                                                                                                                        | ONSET DATE TIME<br><i>99:99=UNK</i> | END DATE | OUTCOME   | INTENS | RELAT. DF02      | RELAT. MALANIL   | ALT RELAT          | ALTRELOT HER         | ACTION |
|---------|---------|---------|--------|----------------|--------------------------------------|----------------|----------------------------------------------------------------------------------------------------------------------------------------------------|-------------------------------------|----------|-----------|--------|------------------|------------------|--------------------|----------------------|--------|
|         |         |         |        |                |                                      |                | HEPATITIS, DENIED ALCOHOL DRINKING OR HERBAL USE                                                                                                   |                                     |          |           |        |                  |                  |                    |                      |        |
|         |         | 3 mg/kg | 4      | ALT INCREASED  | Alanine aminotransferase increased   | Investigations | DAY 14 FOLLOW UP AST = 24, ACT = 54. (DECREASE FROM DAY 7 RESULT), NO CLINICAL HEPATITIS, FROM DATA OF 5 PATIENT, SUGGEST TRANSIENT ELEVATE OF ACT |                                     |          | Recovered | Mild   | Possibly related | Possibly related | Concurrent illness | MALARIA PF INFECTION | None   |
|         |         | 6 mg/kg | 1      | INCREASED SGOT | Aspartate aminotransferase increased | Investigations | THE BLOOD RESULT FOR SGOT, SGPT WERE INCREASED BUT THEY WERE WITHIN 2 FOLD OF NORMAL RANGE. HE DENIED FOR HISTORY OF                               |                                     |          | Recovered | Mild   | Possibly related | Possibly related | Other              | UNKNOWN              | None   |

TSM02 Individual subject listings part 1

CSR Appendix 16.2

| SUBJ ID | INITIAL | ARM     | AE SEQ | AETERM         | AEDECOD                            | AESOC          | DESCRIPTION                                                                                                                                                                                                     | ONSET DATE TIME<br><i>99:99=UNK</i> | END DATE | OUTCOME   | INTENS | RELAT. DF02      | RELAT. MALANIL   | ALT RELAT | ALTRELOT HER | ACTION |
|---------|---------|---------|--------|----------------|------------------------------------|----------------|-----------------------------------------------------------------------------------------------------------------------------------------------------------------------------------------------------------------|-------------------------------------|----------|-----------|--------|------------------|------------------|-----------|--------------|--------|
|         |         |         |        |                |                                    |                | ALCOHOL DRINKING OR HERBAL MEDICINE. DAY 14 OF STUDY, THE SGOT AND SGPT RESULT WERE NORMAL.                                                                                                                     |                                     |          |           |        |                  |                  |           |              |        |
|         |         | 6 mg/kg | 2      | INCREASED SGPT | Alanine aminotransferase increased | Investigations | THE BLOOD RESULT FOR SGOT, SGPT WERE INCREASED BUT THEY WERE WITHIN 2 FOLD OF NORMAL RANGE. HE DENIED FOR HISTORY OF ALCOHOL DRINKING OR HERBAL MEDICINE. DAY14 OF STUDY, THE SGOT AND SGPT RESULT WERE NORMAL. |                                     |          | Recovered | Mild   | Possibly related | Possibly related | Other     | UNKNOWN      | None   |

TSM02 Individual subject listings part 1

CSR Appendix 16.2

| SUBJ ID | INITIAL | ARM     | AE SEQ | AETERM         | AEDECOD                              | AESOC                              | DESCRIPTION                                                                                                                                                                                                                                               | ONSET DATE TIME<br><i>99:99=UNK</i> | END DATE | OUTCOME   | INTENS   | RELAT. DF02      | RELAT. MALANIL   | ALT RELAT          | ALTRELOT HER             | ACTION          |
|---------|---------|---------|--------|----------------|--------------------------------------|------------------------------------|-----------------------------------------------------------------------------------------------------------------------------------------------------------------------------------------------------------------------------------------------------------|-------------------------------------|----------|-----------|----------|------------------|------------------|--------------------|--------------------------|-----------------|
|         |         | 6 mg/kg | 1      | HYPER K+       | Hyperkalemia                         | Metabolism and nutrition disorders | THE BLOOD SAMPLE WAS STORED OVERNIGHT, SO THE RESULT OF E'LYTE WAS ERROR. IT HAD AN EFFECT ON POTASSIUM, SO K+ LEVEL WAS HIGHT (6.2) WITHOUT ANY SPECIFIC SIGN AND SYMPTOMS. THE BLOOD WAS INVESTIGATED AGAIN IN THE AFTERNOON, K+ LEVEL WAS NORMAL RANGE |                                     |          | Recovered | Mild     | Not related      | Not related      | Concurrent illness | UNCOMPLICATED MALARIA    | Other treatment |
|         |         | 6 mg/kg | 2      | INCREASED SGOT | Aspartate aminotransferase increased | Investigations                     | SGOT AND SGPT RESULTS WERE INCREASED DURING THE FOLLOW UP ON DAY 7. HE                                                                                                                                                                                    |                                     |          | Recovered | Moderate | Possibly related | Possibly related | Concurrent illness | UNCOMPLICATED PF MALARIA | None            |

TSM02 Individual subject listings part 1

CSR Appendix 16.2

| SUBJ ID | INITIAL | ARM     | AE SEQ | AETERM         | AEDECOD                            | AESOC          | DESCRIPTION                                                                                                                                                                                                  | ONSET DATE TIME<br><i>99:99=UNK</i> | END DATE | OUTCOME   | INTENS   | RELAT. DF02      | RELAT. MALANIL   | ALT RELAT          | ALTRELOT HER             | ACTION |
|---------|---------|---------|--------|----------------|------------------------------------|----------------|--------------------------------------------------------------------------------------------------------------------------------------------------------------------------------------------------------------|-------------------------------------|----------|-----------|----------|------------------|------------------|--------------------|--------------------------|--------|
|         |         |         |        |                |                                    |                | HAD NO SIGN OF JAUNDICE AND DENIED FOR HISTORY OF ALCOHOL DRINKING OR HERBAL MEDICINE. ON 30 APR 12, THE RESULT WAS DECREASED TO NORMAL RANGE                                                                |                                     |          |           |          |                  |                  |                    |                          |        |
|         |         | 6 mg/kg | 3      | INCREASED SGPT | Alanine aminotransferase increased | Investigations | SGOT AND SGPT RESULTS WERE INCREASED DURING THE FOLLOW UP ON DAY 7. HE HAD NO SIGN OF JAUNDICE AND DENIED FOR HISTORY OF ALCOHOL DRINKING OR HERBAL MEDICINE. ON 30APR12, THE RESULT WAS DECREASED TO NORMAL |                                     |          | Recovered | Moderate | Possibly related | Possibly related | Concurrent illness | UNCOMPLICATED PF MALARIA | None   |

TSM02 Individual subject listings part 1

CSR Appendix 16.2

| SUBJ ID | INITIAL | ARM     | AE SEQ | AETERM         | AEDECOD                              | AESOC                                | DESCRIPTION                                                                                                                                            | ONSET DATE TIME<br><i>99:99=UNK</i> | END DATE | OUTCOME   | INTENS | RELAT. DF02 | RELAT. MALANIL   | ALT RELAT          | ALTRELOTHER              | ACTION               |
|---------|---------|---------|--------|----------------|--------------------------------------|--------------------------------------|--------------------------------------------------------------------------------------------------------------------------------------------------------|-------------------------------------|----------|-----------|--------|-------------|------------------|--------------------|--------------------------|----------------------|
|         |         |         |        |                |                                      |                                      | RANGE.                                                                                                                                                 |                                     |          |           |        |             |                  |                    |                          |                      |
|         |         | 6 mg/kg | 1      | DIZZINESS      | Dizziness                            | Nervous system disorders             | SHE HAS DIZZINESS IN THE MORNING ON 20 APR 2012. SHE HAD NO NAUSEA OR VOMITING                                                                         |                                     |          | Recovered | Mild   | Not related | Possibly related | Concurrent illness | UNCOMPLICATED MALARIA    | None                 |
|         |         | 6 mg/kg | 2      | ANEMIA         | Anaemia                              | Blood and lymphatic system disorders | SHE HAD ANEMIA. HEMOGLOBIN DROP FROM SCREENING DAY. NO ANEMIC SYMPTOM                                                                                  |                                     |          | Recovered | Severe | Not related | Not related      | Concurrent illness | UNCOMPLICATED PF MALARIA | Treatment Medication |
|         |         | 6 mg/kg | 3      | INCREASED SGOT | Aspartate aminotransferase increased | Investigations                       | THE RESULT OF SGOT& SGPT WERE INCREASED BUT LESS THAN 2.5 FOLD. SHE HAD NO HISTORY OF ALCOHOLIC DRINKING OR USING HERBAL MEDICINE. SHE HAD NO JAUNDICE |                                     |          | Recovered | Mild   | Not related | Not related      | Concurrent illness | UNCOMPLICATED PF MALARIA | None                 |

TSM02 Individual subject listings part 1

CSR Appendix 16.2

| SUBJ ID | INITIAL | ARM     | AE SEQ | AETERM         | AEDECOD                            | AESOC          | DESCRIPTION                                                                                                                                                | ONSET DATE TIME<br><i>99:99=UNK</i> | END DATE | OUTCOME   | INTENS | RELAT. DF02 | RELAT. MALANIL | ALT RELAT          | ALTRELOT HER             | ACTION |
|---------|---------|---------|--------|----------------|------------------------------------|----------------|------------------------------------------------------------------------------------------------------------------------------------------------------------|-------------------------------------|----------|-----------|--------|-------------|----------------|--------------------|--------------------------|--------|
|         |         |         |        |                |                                    |                | TOO.                                                                                                                                                       |                                     |          |           |        |             |                |                    |                          |        |
|         |         | 6 mg/kg | 4      | INCREASED SGPT | Alanine aminotransferase increased | Investigations | THE RESULT OF SGOT & SGPT WERE INCREASED BUT LESS THAN 2.5 FOLD. SHE HAD NO HISTORY OF ALCOHOL DRINKING OR USING HERBAL MEDICINE. SHE HAD NO JAUNDICE TOO. |                                     |          | Recovered | Mild   | Not related | Not related    | Concurrent illness | UNCOMPLICATED PF MALARIA | None   |



TSM02 Individual subject listings part 1  
CSR Appendix 16.2

16.2.7.2 Serious adverse event listing  
*Not applicable.*

## TSM02 Individual subject listings part 1

## CSR Appendix 16.2

## 16.2.7.3 Physical examination (including weight and height)

| SUBJID | INITIAL | ARM       | DAY | HGT cm | WGT kg | GCSEYE | GCSVERBAL | GCSMOTOR | GCSTOTAL |
|--------|---------|-----------|-----|--------|--------|--------|-----------|----------|----------|
|        |         | 1.5 mg/kg | 1   | 168    | 67.9   | 4      | 5         | 6        | 15       |
|        |         | 1.5 mg/kg | 2   | NA     | NA     | 4      | 5         | 6        |          |
|        |         | 1.5 mg/kg | 3   | NA     | NA     | 4      | 5         | 6        |          |
|        |         | 1.5 mg/kg | 4   | NA     | 68.5   | 4      | 5         | 6        |          |
|        |         | 1.5 mg/kg | 5   | NA     | 69     | 4      | 5         | 6        |          |
|        |         | 1.5 mg/kg | 7   | NA     | 66     | 4      | 5         | 6        |          |
|        |         | 1.5 mg/kg | 14  | NA     | 65.7   | 4      | 5         | 6        |          |
|        |         | 1.5 mg/kg | 1   | 160    | 53.5   | 4      | 5         | 6        | 15       |
|        |         | 1.5 mg/kg | 2   | NA     | NA     | 4      | 5         | 6        |          |
|        |         | 1.5 mg/kg | 3   | NA     | NA     | 4      | 5         | 6        |          |
|        |         | 1.5 mg/kg | 4   | NA     | 55.7   | 4      | 5         | 6        |          |
|        |         | 1.5 mg/kg | 5   | NA     | 56.4   | 4      | 5         | 6        |          |
|        |         | 1.5 mg/kg | 7   | NA     | 55.7   | 4      | 5         | 6        |          |
|        |         | 1.5 mg/kg | 14  | NA     | 54.3   | 4      | 5         | 6        |          |
|        |         | 1.5 mg/kg | 1   | 162    | 52.1   | 4      | 5         | 6        | 15       |
|        |         | 1.5 mg/kg | 2   | NA     | NA     | 4      | 5         | 6        |          |
|        |         | 1.5 mg/kg | 3   | NA     | NA     | 4      | 5         | 6        |          |
|        |         | 1.5 mg/kg | 4   | NA     | 51.7   | 4      | 5         | 6        |          |
|        |         | 1.5 mg/kg | 7   | NA     | 50     | 4      | 5         | 6        |          |
|        |         | 1.5 mg/kg | 14  | NA     | 50     | 4      | 5         | 6        |          |
|        |         | 3 mg/kg   | 1   | 163    | 50     | 4      | 5         | 6        | 15       |

TSM02 Individual subject listings part 1

CSR Appendix 16.2

| SUBJID | INITIAL | ARM     | DAY | HGT cm | WGT kg | GCSEYE | GCSVERBAL | GCSMOTOR | GCSTOTAL |
|--------|---------|---------|-----|--------|--------|--------|-----------|----------|----------|
|        |         | 3 mg/kg | 2   | NA     | NA     | 4      | 5         | 6        |          |
|        |         | 3 mg/kg | 3   | NA     | NA     | 4      | 5         | 6        |          |
|        |         | 3 mg/kg | 4   | NA     | 49     | 4      | 5         | 6        |          |
|        |         | 3 mg/kg | 7   | NA     | 49     | 4      | 5         | 6        |          |
|        |         | 3 mg/kg | 14  | NA     | 49     | 4      | 5         | 6        |          |
|        |         | 3 mg/kg | 1   | 165    | 47.2   | 4      | 5         | 6        | 15       |
|        |         | 3 mg/kg | 2   | NA     | NA     | 4      | 5         | 6        |          |
|        |         | 3 mg/kg | 3   | NA     | NA     | 4      | 5         | 6        |          |
|        |         | 3 mg/kg | 4   | NA     | 45.2   | 4      | 5         | 6        |          |
|        |         | 3 mg/kg | 7   | NA     | 45.5   | 4      | 5         | 6        |          |
|        |         | 3 mg/kg | 14  | NA     | 47     | 4      | 5         | 6        |          |
|        |         | 3 mg/kg | 1   | 165    | 49.3   | 4      | 5         | 6        | 15       |
|        |         | 3 mg/kg | 2   | NA     | NA     | 4      | 5         | 6        |          |
|        |         | 3 mg/kg | 3   | NA     | NA     | 4      | 5         | 6        |          |
|        |         | 3 mg/kg | 4   | NA     | 48.5   | 4      | 5         | 6        |          |
|        |         | 3 mg/kg | 7   | NA     | 49     | 4      | 5         | 6        |          |
|        |         | 3 mg/kg | 14  | NA     | 49     | 4      | 5         | 6        |          |
|        |         | 6 mg/kg | 1   | 175    | 62.9   | 4      | 5         | 6        | 15       |
|        |         | 6 mg/kg | 2   | NA     | NA     | 4      | 5         | 6        |          |
|        |         | 6 mg/kg | 3   | NA     | NA     | 4      | 5         | 6        |          |
|        |         | 6 mg/kg | 4   | NA     | 62.2   | 4      | 5         | 6        |          |
|        |         | 6 mg/kg | 7   | NA     | 62.9   | 4      | 5         | 6        |          |
|        |         | 6 mg/kg | 14  | NA     | 62.9   | 4      | 5         | 6        |          |

TSM02 Individual subject listings part 1

CSR Appendix 16.2

| SUBJID | INITIAL | ARM     | DAY | HGT cm | WGT kg | GCSEYE | GCSVERBAL | GCSMOTOR | GCSTOTAL |
|--------|---------|---------|-----|--------|--------|--------|-----------|----------|----------|
|        |         | 6 mg/kg | 1   | 157    | 51     | 4      | 5         | 6        | 15       |
|        |         | 6 mg/kg | 2   | NA     | NA     | 4      | 5         | 6        |          |
|        |         | 6 mg/kg | 3   | NA     | NA     | 4      | 5         | 6        |          |
|        |         | 6 mg/kg | 4   | NA     | 50.8   | 4      | 5         | 6        |          |
|        |         | 6 mg/kg | 7   | NA     | 51     | 4      | 5         | 6        |          |
|        |         | 6 mg/kg | 14  | NA     | 51     | 4      | 5         | 6        |          |
|        |         | 6 mg/kg | 1   | 155    | 51.1   | 4      | 5         | 6        | 15       |
|        |         | 6 mg/kg | 2   | NA     | NA     | 4      | 5         | 6        |          |
|        |         | 6 mg/kg | 3   | NA     | NA     | 4      | 5         | 6        |          |
|        |         | 6 mg/kg | 4   | NA     | 52.1   | 4      | 5         | 6        |          |
|        |         | 6 mg/kg | 7   | NA     | 51     | 4      | 5         | 6        |          |
|        |         | 6 mg/kg | 14  | NA     | 52     | 4      | 5         | 6        |          |

TSM02 Individual subject listings part 1

CSR Appendix 16.2

16.2.7.3 Physical examination (including weight and height) (-continued)

| SUBJID | INITIAL | ARM       | DAY | EARS   | EYES   | NOSE   | MOUTH  | THROAT | HEENT |
|--------|---------|-----------|-----|--------|--------|--------|--------|--------|-------|
|        |         | 1.5 mg/kg | 1   | Normal | Normal | Normal | Normal | Normal | NA    |
|        |         | 1.5 mg/kg | 2   | NA     | NA     | NA     | NA     | NA     | No    |
|        |         | 1.5 mg/kg | 3   | NA     | NA     | NA     | NA     | NA     | No    |
|        |         | 1.5 mg/kg | 4   | NA     | NA     | NA     | NA     | NA     | No    |
|        |         | 1.5 mg/kg | 5   | NA     | NA     | NA     | NA     | NA     | No    |
|        |         | 1.5 mg/kg | 7   | NA     | NA     | NA     | NA     | NA     | No    |
|        |         | 1.5 mg/kg | 14  | NA     | NA     | NA     | NA     | NA     | No    |
|        |         | 1.5 mg/kg | 1   | Normal | Normal | Normal | Normal | Normal | NA    |
|        |         | 1.5 mg/kg | 2   | NA     | NA     | NA     | NA     | NA     | No    |
|        |         | 1.5 mg/kg | 3   | NA     | NA     | NA     | NA     | NA     | No    |
|        |         | 1.5 mg/kg | 4   | NA     | NA     | NA     | NA     | NA     | No    |
|        |         | 1.5 mg/kg | 5   | NA     | NA     | NA     | NA     | NA     | No    |
|        |         | 1.5 mg/kg | 7   | NA     | NA     | NA     | NA     | NA     | No    |
|        |         | 1.5 mg/kg | 14  | NA     | NA     | NA     | NA     | NA     | No    |
|        |         | 1.5 mg/kg | 1   | Normal | Normal | Normal | Normal | Normal | NA    |
|        |         | 1.5 mg/kg | 2   | NA     | NA     | NA     | NA     | NA     | No    |
|        |         | 1.5 mg/kg | 3   | NA     | NA     | NA     | NA     | NA     | No    |
|        |         | 1.5 mg/kg | 4   | NA     | NA     | NA     | NA     | NA     | No    |
|        |         | 1.5 mg/kg | 7   | NA     | NA     | NA     | NA     | NA     | No    |
|        |         | 1.5 mg/kg | 14  | NA     | NA     | NA     | NA     | NA     | No    |
|        |         | 3 mg/kg   | 1   | Normal | Normal | Normal | Normal | Normal | NA    |
|        |         | 3 mg/kg   | 2   | NA     | NA     | NA     | NA     | NA     | No    |

TSM02 Individual subject listings part 1

CSR Appendix 16.2

| SUBJID | INITIAL | ARM     | DAY | EARS   | EYES   | NOSE   | MOUTH  | THROAT | HEENT |
|--------|---------|---------|-----|--------|--------|--------|--------|--------|-------|
|        |         | 3 mg/kg | 3   | NA     | NA     | NA     | NA     | NA     | No    |
|        |         | 3 mg/kg | 4   | NA     | NA     | NA     | NA     | NA     | No    |
|        |         | 3 mg/kg | 7   | NA     | NA     | NA     | NA     | NA     | No    |
|        |         | 3 mg/kg | 14  | NA     | NA     | NA     | NA     | NA     | No    |
|        |         | 3 mg/kg | 1   | Normal | Normal | Normal | Normal | Normal | NA    |
|        |         | 3 mg/kg | 2   | NA     | NA     | NA     | NA     | NA     | No    |
|        |         | 3 mg/kg | 3   | NA     | NA     | NA     | NA     | NA     | No    |
|        |         | 3 mg/kg | 4   | NA     | NA     | NA     | NA     | NA     | No    |
|        |         | 3 mg/kg | 7   | NA     | NA     | NA     | NA     | NA     | No    |
|        |         | 3 mg/kg | 14  | NA     | NA     | NA     | NA     | NA     | No    |
|        |         | 3 mg/kg | 1   | Normal | Normal | Normal | Normal | Normal | NA    |
|        |         | 3 mg/kg | 2   | NA     | NA     | NA     | NA     | NA     | No    |
|        |         | 3 mg/kg | 3   | NA     | NA     | NA     | NA     | NA     | No    |
|        |         | 3 mg/kg | 4   | NA     | NA     | NA     | NA     | NA     | No    |
|        |         | 3 mg/kg | 7   | NA     | NA     | NA     | NA     | NA     | No    |
|        |         | 3 mg/kg | 14  | NA     | NA     | NA     | NA     | NA     | No    |
|        |         | 6 mg/kg | 1   | Normal | Normal | Normal | Normal | Normal | NA    |
|        |         | 6 mg/kg | 2   | NA     | NA     | NA     | NA     | NA     | No    |
|        |         | 6 mg/kg | 3   | NA     | NA     | NA     | NA     | NA     | No    |
|        |         | 6 mg/kg | 4   | NA     | NA     | NA     | NA     | NA     | No    |
|        |         | 6 mg/kg | 7   | NA     | NA     | NA     | NA     | NA     | No    |
|        |         | 6 mg/kg | 14  | NA     | NA     | NA     | NA     | NA     | No    |
|        |         | 6 mg/kg | 1   | Normal | Normal | Normal | Normal | Normal | NA    |

TSM02 Individual subject listings part 1

CSR Appendix 16.2

| SUBJID | INITIAL | ARM     | DAY | EARS   | EYES   | NOSE   | MOUTH  | THROAT | HEENT |
|--------|---------|---------|-----|--------|--------|--------|--------|--------|-------|
|        |         | 6 mg/kg | 2   | NA     | NA     | NA     | NA     | NA     | No    |
|        |         | 6 mg/kg | 3   | NA     | NA     | NA     | NA     | NA     | No    |
|        |         | 6 mg/kg | 4   | NA     | NA     | NA     | NA     | NA     | No    |
|        |         | 6 mg/kg | 7   | NA     | NA     | NA     | NA     | NA     | No    |
|        |         | 6 mg/kg | 14  | NA     | NA     | NA     | NA     | NA     | No    |
|        |         | 6 mg/kg | 1   | Normal | Normal | Normal | Normal | Normal | NA    |
|        |         | 6 mg/kg | 2   | NA     | NA     | NA     | NA     | NA     | No    |
|        |         | 6 mg/kg | 3   | NA     | NA     | NA     | NA     | NA     | No    |
|        |         | 6 mg/kg | 4   | NA     | NA     | NA     | NA     | NA     | No    |
|        |         | 6 mg/kg | 7   | NA     | NA     | NA     | NA     | NA     | No    |
|        |         | 6 mg/kg | 14  | NA     | NA     | NA     | NA     | NA     | No    |

TSM02 Individual subject listings part 1

CSR Appendix 16.2

16.2.7.3 Physical examination (including weight and height) (-continued)

| SUBJID | INITIAL | ARM       | DAY | HEPATOMEGALY | SPLENOMEGALY | CARDIO | RESPIRATORY | GASTRO | SKIN   | JOINTS | CNS    |
|--------|---------|-----------|-----|--------------|--------------|--------|-------------|--------|--------|--------|--------|
|        |         | 1.5 mg/kg | 1   | No           | No           | Normal | Normal      | Normal | Normal | Normal | Normal |
|        |         | 1.5 mg/kg | 2   | No           | No           | No     | No          | No     | No     | No     | No     |
|        |         | 1.5 mg/kg | 3   | No           | No           | No     | No          | No     | No     | No     | No     |
|        |         | 1.5 mg/kg | 4   | No           | No           | No     | No          | No     | No     | No     | No     |
|        |         | 1.5 mg/kg | 5   | No           | No           | No     | No          | No     | No     | No     | No     |
|        |         | 1.5 mg/kg | 7   | No           | No           | No     | No          | No     | No     | No     | No     |
|        |         | 1.5 mg/kg | 14  | No           | No           | No     | No          | No     | No     | No     | No     |
|        |         | 1.5 mg/kg | 1   | No           | No           | Normal | Normal      | Normal | Normal | Normal | Normal |
|        |         | 1.5 mg/kg | 2   | No           | No           | No     | No          | No     | No     | No     | No     |
|        |         | 1.5 mg/kg | 3   | No           | No           | No     | No          | No     | No     | No     | No     |
|        |         | 1.5 mg/kg | 4   | No           | No           | No     | No          | No     | No     | No     | No     |
|        |         | 1.5 mg/kg | 5   | No           | No           | No     | No          | No     | No     | No     | No     |
|        |         | 1.5 mg/kg | 7   | No           | No           | No     | No          | No     | No     | No     | No     |
|        |         | 1.5 mg/kg | 14  | No           | No           | No     | No          | No     | No     | No     | No     |
|        |         | 1.5 mg/kg | 1   | No           | No           | Normal | Normal      | Normal | Normal | Normal | Normal |
|        |         | 1.5 mg/kg | 2   | No           | No           | No     | No          | No     | No     | No     | No     |
|        |         | 1.5 mg/kg | 3   | No           | No           | No     | No          | No     | No     | No     | No     |
|        |         | 1.5 mg/kg | 4   | No           | No           | No     | No          | No     | No     | No     | No     |
|        |         | 1.5 mg/kg | 7   | No           | No           | No     | No          | No     | No     | No     | No     |
|        |         | 1.5 mg/kg | 14  | No           | No           | No     | No          | No     | No     | No     | No     |
|        |         | 3 mg/kg   | 1   | No           | No           | Normal | Normal      | Normal | Normal | Normal | Normal |
|        |         | 3 mg/kg   | 2   | No           | No           | No     | No          | No     | No     | No     | No     |



## TSM02 Individual subject listings part 1

## CSR Appendix 16.2

| SUBJID | INITIAL | ARM     | DAY | HEPATOMEGALY | SPLENOMEGALY | CARDIO | RESPIRATORY | GASTRO | SKIN          | JOINTS        | CNS    |
|--------|---------|---------|-----|--------------|--------------|--------|-------------|--------|---------------|---------------|--------|
|        |         | 3 mg/kg | 3   | No           | No           | No     | No          | No     | No            | No            | No     |
|        |         | 3 mg/kg | 4   | No           | No           | No     | No          | No     | No            | No            | No     |
|        |         | 3 mg/kg | 7   | No           | No           | No     | No          | No     | No            | No            | No     |
|        |         | 3 mg/kg | 14  | No           | No           | No     | No          | No     | No            | No            | No     |
|        |         | 3 mg/kg | 1   | No           | No           | Normal | Normal      | Normal | Normal        | Normal        | Normal |
|        |         | 3 mg/kg | 2   | No           | No           | No     | No          | No     | No            | No            | No     |
|        |         | 3 mg/kg | 3   | No           | No           | No     | No          | No     | No            | No            | No     |
|        |         | 3 mg/kg | 4   | No           | No           | No     | No          | No     | No            | No            | No     |
|        |         | 3 mg/kg | 7   | No           | No           | No     | No          | No     | No            | No            | No     |
|        |         | 3 mg/kg | 14  | No           | No           | No     | No          | No     | No            | No            | No     |
|        |         | 3 mg/kg | 1   | No           | No           | Normal | Normal      | Normal | Normal        | Normal        | Normal |
|        |         | 3 mg/kg | 2   | No           | No           | No     | No          | No     | No            | No            | No     |
|        |         | 3 mg/kg | 3   | No           | No           | No     | No          | No     | No            | No            | No     |
|        |         | 3 mg/kg | 4   | No           | No           | No     | No          | No     | No            | No            | No     |
|        |         | 3 mg/kg | 7   | No           | No           | No     | No          | No     | No            | No            | No     |
|        |         | 3 mg/kg | 14  | No           | No           | No     | No          | No     | No            | No            | No     |
|        |         | 6 mg/kg | 1   | No           | No           | Normal | Normal      | Normal | Normal        | Normal        | Normal |
|        |         | 6 mg/kg | 2   | No           | No           | No     | No          | No     | No            | No            | No     |
|        |         | 6 mg/kg | 3   | No           | No           | No     | No          | No     | No            | No            | No     |
|        |         | 6 mg/kg | 4   | No           | No           | No     | No          | No     | No            | No            | No     |
|        |         | 6 mg/kg | 7   | No           | No           | No     | No          | No     | No            | No            | No     |
|        |         | 6 mg/kg | 14  | No           | No           | No     | No          | No     | No            | No            | No     |
|        |         | 6 mg/kg | 1   | No           | No           | Normal | Normal      | Normal | Not available | Not available | Normal |

TSM02 Individual subject listings part 1

CSR Appendix 16.2

| SUBJID | INITIAL | ARM     | DAY | HEPATOMEGALY | SPLENOMEGALY | CARDIO | RESPIRATORY | GASTRO | SKIN   | JOINTS | CNS    |
|--------|---------|---------|-----|--------------|--------------|--------|-------------|--------|--------|--------|--------|
|        |         | 6 mg/kg | 2   | No           | No           | No     | No          | No     | No     | No     | No     |
|        |         | 6 mg/kg | 3   | No           | No           | No     | No          | No     | No     | No     | No     |
|        |         | 6 mg/kg | 4   | No           | No           | No     | No          | No     | No     | No     | No     |
|        |         | 6 mg/kg | 7   | No           | No           | No     | No          | No     | No     | No     | No     |
|        |         | 6 mg/kg | 14  | No           | No           | No     | No          | No     | No     | No     | No     |
|        |         | 6 mg/kg | 1   | No           | No           | Normal | Normal      | Normal | Normal | Normal | Normal |
|        |         | 6 mg/kg | 2   | No           | No           | No     | No          | No     | No     | No     | No     |
|        |         | 6 mg/kg | 3   | No           | No           | No     | No          | No     | No     | No     | No     |
|        |         | 6 mg/kg | 4   | No           | No           | No     | No          | No     | No     | No     | No     |
|        |         | 6 mg/kg | 7   | No           | No           | No     | No          | No     | No     | No     | No     |
|        |         | 6 mg/kg | 14  | No           | No           | No     | No          | No     | No     | No     | No     |

## TSM02 Individual subject listings part 1

## CSR Appendix 16.2

## 16.2.7.4 Vital signs

| <b>SUBJID</b> | <b>INITIAL</b> | <b>ARM</b> | <b>TIMEPOINT</b> | <b>TEMP (Celsius)</b><br><i>99=Not available</i> | <b>HR (bpm)</b><br><i>999=Not available</i> | <b>RR (bpm)</b><br><i>99=Not available</i> | <b>BP (mmHg)</b><br><i>999/999= Not available</i> |
|---------------|----------------|------------|------------------|--------------------------------------------------|---------------------------------------------|--------------------------------------------|---------------------------------------------------|
|               |                | 1.5 mg/kg  | screening        | 37.8                                             | 94                                          | 24                                         | 116/079                                           |
|               |                | 1.5 mg/kg  | D1H0             | 38.8                                             | 98                                          | 24                                         | 113/083                                           |
|               |                | 1.5 mg/kg  | D1H0:30          | 38.7                                             | 103                                         | 24                                         | 109/071                                           |
|               |                | 1.5 mg/kg  | D1H1             | 38.3                                             | 94                                          | 24                                         | 110/069                                           |
|               |                | 1.5 mg/kg  | D1H1:30          | 38.1                                             | 96                                          | 24                                         | 107/068                                           |
|               |                | 1.5 mg/kg  | D1H2             | 37.8                                             | 99                                          | 22                                         | 113/075                                           |
|               |                | 1.5 mg/kg  | D1H3             | 37.7                                             | 999                                         | 99                                         | 999/999                                           |
|               |                | 1.5 mg/kg  | D1H4             | 37.8                                             | 999                                         | 99                                         | 999/999                                           |
|               |                | 1.5 mg/kg  | D1H6             | 37.1                                             | 93                                          | 22                                         | 112/076                                           |
|               |                | 1.5 mg/kg  | D1H8             | 38.7                                             | 98                                          | 20                                         | 107/067                                           |
|               |                | 1.5 mg/kg  | D1H10            | 39.2                                             | 999                                         | 99                                         | 999/999                                           |
|               |                | 1.5 mg/kg  | D1H12            | 38                                               | 98                                          | 22                                         | 106/073                                           |
|               |                | 1.5 mg/kg  | D1H14            | 37.6                                             | 92                                          | 20                                         | 110/072                                           |
|               |                | 1.5 mg/kg  | D1H18            | 38.9                                             | 101                                         | 24                                         | 109/067                                           |
|               |                | 1.5 mg/kg  | D1H20            | 38.4                                             | 97                                          | 24                                         | 108/073                                           |
|               |                | 1.5 mg/kg  | D2H24            | 39                                               | 108                                         | 24                                         | 113/071                                           |
|               |                | 1.5 mg/kg  | D2H30            | 39.4                                             | 108                                         | 24                                         | 114/075                                           |
|               |                | 1.5 mg/kg  | D2H36            | 39.2                                             | 108                                         | 24                                         | 120/080                                           |
|               |                | 1.5 mg/kg  | D2H42            | 38.8                                             | 96                                          | 24                                         | 107/073                                           |
|               |                | 1.5 mg/kg  | D3H48            | 39.5                                             | 110                                         | 24                                         | 101/070                                           |
|               |                | 1.5 mg/kg  | D3H54            | 38.5                                             | 95                                          | 22                                         | 109/070                                           |
|               |                | 1.5 mg/kg  | D3H60            | 38.2                                             | 88                                          | 20                                         | 099/056                                           |
|               |                | 1.5 mg/kg  | D3H66            | 36.9                                             | 79                                          | 20                                         | 107/068                                           |
|               |                | 1.5 mg/kg  | D4H72            | 37.2                                             | 81                                          | 20                                         | 112/072                                           |
|               |                | 1.5 mg/kg  | D5               | 36.8                                             | 90                                          | 18                                         | 100/060                                           |
|               |                | 1.5 mg/kg  | D7               | 36.5                                             | 87                                          | 16                                         | 105/062                                           |
|               |                | 1.5 mg/kg  | D14              | 36.7                                             | 96                                          | 18                                         | 123/086                                           |
|               |                | 1.5 mg/kg  | screening        | 39.6                                             | 114                                         | 22                                         | 092/059                                           |
|               |                | 1.5 mg/kg  | D1H0             | 37.1                                             | 82                                          | 20                                         | 096/058                                           |
|               |                | 1.5 mg/kg  | D1H0:30          | 37.3                                             | 90                                          | 20                                         | 097/060                                           |
|               |                | 1.5 mg/kg  | D1H1             | 37.5                                             | 95                                          | 20                                         | 104/068                                           |
|               |                | 1.5 mg/kg  | D1H1:30          | 36.9                                             | 90                                          | 20                                         | 102/069                                           |
|               |                | 1.5 mg/kg  | D1H2             | 37.8                                             | 88                                          | 20                                         | 095/060                                           |
|               |                | 1.5 mg/kg  | D1H3             | 37.8                                             | 999                                         | 99                                         | 999/999                                           |
|               |                | 1.5 mg/kg  | D1H4             | 37.7                                             | 999                                         | 99                                         | 999/999                                           |

## TSM02 Individual subject listings part 1

## CSR Appendix 16.2

| <b>SUBJID</b> | <b>INITIAL</b> | <b>ARM</b> | <b>TIMEPOINT</b> | <b>TEMP (Celsius)</b><br><i>99=Not available</i> | <b>HR (bpm)</b><br><i>999=Not available</i> | <b>RR (bpm)</b><br><i>99=Not available</i> | <b>BP (mmHg)</b><br><i>999/999= Not available</i> |
|---------------|----------------|------------|------------------|--------------------------------------------------|---------------------------------------------|--------------------------------------------|---------------------------------------------------|
|               |                | 1.5 mg/kg  | D1H6             | 38                                               | 87                                          | 20                                         | 104/066                                           |
|               |                | 1.5 mg/kg  | D1H8             | 36.1                                             | 77                                          | 18                                         | 082/056                                           |
|               |                | 1.5 mg/kg  | D1H10            | 36                                               | 999                                         | 99                                         | 999/999                                           |
|               |                | 1.5 mg/kg  | D1H12            | 36.2                                             | 72                                          | 20                                         | 085/058                                           |
|               |                | 1.5 mg/kg  | D1H14            | 36.8                                             | 84                                          | 20                                         | 094/066                                           |
|               |                | 1.5 mg/kg  | D1H18            | 36                                               | 76                                          | 20                                         | 095/059                                           |
|               |                | 1.5 mg/kg  | D1H20            | 36.7                                             | 999                                         | 99                                         | 999/999                                           |
|               |                | 1.5 mg/kg  | D2H24            | 36.7                                             | 77                                          | 22                                         | 092/063                                           |
|               |                | 1.5 mg/kg  | D2H30            | 38.9                                             | 96                                          | 20                                         | 102/062                                           |
|               |                | 1.5 mg/kg  | D2H36            | 37.9                                             | 88                                          | 20                                         | 097/065                                           |
|               |                | 1.5 mg/kg  | D2H42            | 37.1                                             | 84                                          | 18                                         | 099/069                                           |
|               |                | 1.5 mg/kg  | D3H48            | 37                                               | 80                                          | 20                                         | 106/066                                           |
|               |                | 1.5 mg/kg  | D3H54            | 36.9                                             | 80                                          | 20                                         | 104/073                                           |
|               |                | 1.5 mg/kg  | D3H60            | 37.2                                             | 74                                          | 20                                         | 095/056                                           |
|               |                | 1.5 mg/kg  | D3H66            | 36.7                                             | 77                                          | 20                                         | 101/067                                           |
|               |                | 1.5 mg/kg  | D4H72            | 37.4                                             | 81                                          | 20                                         | 103/068                                           |
|               |                | 1.5 mg/kg  | D7               | 36.4                                             | 66                                          | 18                                         | 121/073                                           |
|               |                | 1.5 mg/kg  | D14              | 36.6                                             | 89                                          | 18                                         | 108/076                                           |
|               |                | 1.5 mg/kg  | screening        | 39                                               | 79                                          | 18                                         | 117/064                                           |
|               |                | 1.5 mg/kg  | D1H0             | 38.4                                             | 84                                          | 18                                         | 093/057                                           |
|               |                | 1.5 mg/kg  | D1H0:30          | 38.5                                             | 84                                          | 18                                         | 117/067                                           |
|               |                | 1.5 mg/kg  | D1H1             | 38.7                                             | 84                                          | 20                                         | 119/067                                           |
|               |                | 1.5 mg/kg  | D1H1:30          | 38.8                                             | 81                                          | 20                                         | 118/070                                           |
|               |                | 1.5 mg/kg  | D1H2             | 38.6                                             | 76                                          | 20                                         | 115/062                                           |
|               |                | 1.5 mg/kg  | D1H3             | 37.7                                             | 999                                         | 99                                         | 999/999                                           |
|               |                | 1.5 mg/kg  | D1H4             | 37.3                                             | 999                                         | 99                                         | 999/999                                           |
|               |                | 1.5 mg/kg  | D1H6             | 37                                               | 63                                          | 18                                         | 109/071                                           |
|               |                | 1.5 mg/kg  | D1H8             | 37.1                                             | 72                                          | 20                                         | 120/080                                           |
|               |                | 1.5 mg/kg  | D1H10            | 36.2                                             | 999                                         | 99                                         | 999/999                                           |
|               |                | 1.5 mg/kg  | D1H12            | 36                                               | 54                                          | 18                                         | 121/083                                           |
|               |                | 1.5 mg/kg  | D1H14            | 36                                               | 60                                          | 18                                         | 114/071                                           |
|               |                | 1.5 mg/kg  | D1H18            | 36.4                                             | 56                                          | 18                                         | 119/075                                           |
|               |                | 1.5 mg/kg  | D1H20            | 37.4                                             | 63                                          | 18                                         | 124/082                                           |
|               |                | 1.5 mg/kg  | D2H24            | 37.5                                             | 63                                          | 18                                         | 120/067                                           |
|               |                | 1.5 mg/kg  | D2H30            | 37.3                                             | 69                                          | 18                                         | 117/074                                           |
|               |                | 1.5 mg/kg  | D2H36            | 37.2                                             | 61                                          | 18                                         | 114/066                                           |

## TSM02 Individual subject listings part 1

## CSR Appendix 16.2

| <b>SUBJID</b> | <b>INITIAL</b> | <b>ARM</b> | <b>TIMEPOINT</b> | <b>TEMP (Celsius)</b><br><i>99=Not available</i> | <b>HR (bpm)</b><br><i>999=Not available</i> | <b>RR (bpm)</b><br><i>99=Not available</i> | <b>BP (mmHg)</b><br><i>999/999= Not available</i> |
|---------------|----------------|------------|------------------|--------------------------------------------------|---------------------------------------------|--------------------------------------------|---------------------------------------------------|
|               |                | 1.5 mg/kg  | D2H42            | 36.4                                             | 65                                          | 18                                         | 117/089                                           |
|               |                | 1.5 mg/kg  | D3H48            | 37.5                                             | 69                                          | 18                                         | 136/082                                           |
|               |                | 1.5 mg/kg  | D3H54            | 36.9                                             | 61                                          | 18                                         | 106/069                                           |
|               |                | 1.5 mg/kg  | D3H60            | 37                                               | 53                                          | 18                                         | 123/075                                           |
|               |                | 1.5 mg/kg  | D3H66            | 36.2                                             | 58                                          | 18                                         | 124/069                                           |
|               |                | 1.5 mg/kg  | D4H72            | 36.7                                             | 54                                          | 18                                         | 131/083                                           |
|               |                | 1.5 mg/kg  | D7               | 36.2                                             | 73                                          | 16                                         | 105/062                                           |
|               |                | 1.5 mg/kg  | D14              | 36.4                                             | 72                                          | 16                                         | 119/075                                           |
|               |                | 3 mg/kg    | screening        | 36.7                                             | 82                                          | 16                                         | 123/084                                           |
|               |                | 3 mg/kg    | D1H0             | 37.6                                             | 78                                          | 18                                         | 110/065                                           |
|               |                | 3 mg/kg    | D1H0:30          | 36.9                                             | 82                                          | 20                                         | 108/070                                           |
|               |                | 3 mg/kg    | D1H1             | 36.5                                             | 92                                          | 20                                         | 110/083                                           |
|               |                | 3 mg/kg    | D1H1:30          | 36.8                                             | 92                                          | 20                                         | 111/072                                           |
|               |                | 3 mg/kg    | D1H2             | 36.6                                             | 83                                          | 18                                         | 109/070                                           |
|               |                | 3 mg/kg    | D1H3             | 36.7                                             | 999                                         | 99                                         | 999/999                                           |
|               |                | 3 mg/kg    | D1H4             | 36.9                                             | 90                                          | 18                                         | 103/074                                           |
|               |                | 3 mg/kg    | D1H6             | 37.2                                             | 89                                          | 18                                         | 107/062                                           |
|               |                | 3 mg/kg    | D1H8             | 36.6                                             | 999                                         | 99                                         | 999/999                                           |
|               |                | 3 mg/kg    | D1H10            | 37.1                                             | 999                                         | 99                                         | 999/999                                           |
|               |                | 3 mg/kg    | D1H12            | 38.5                                             | 93                                          | 20                                         | 111/057                                           |
|               |                | 3 mg/kg    | D1H14            | 36.4                                             | 73                                          | 20                                         | 110/065                                           |
|               |                | 3 mg/kg    | D1H18            | 36.8                                             | 75                                          | 18                                         | 108/062                                           |
|               |                | 3 mg/kg    | D1H20            | 37.4                                             | 80                                          | 20                                         | 106/062                                           |
|               |                | 3 mg/kg    | D2H24            | 38.1                                             | 94                                          | 20                                         | 110/070                                           |
|               |                | 3 mg/kg    | D2H30            | 36.1                                             | 66                                          | 18                                         | 128/080                                           |
|               |                | 3 mg/kg    | D2H36            | 36.3                                             | 71                                          | 18                                         | 111/067                                           |
|               |                | 3 mg/kg    | D2H42            | 36.3                                             | 70                                          | 18                                         | 119/070                                           |
|               |                | 3 mg/kg    | D3H48            | 36.8                                             | 68                                          | 18                                         | 120/071                                           |
|               |                | 3 mg/kg    | D3H54            | 36                                               | 62                                          | 18                                         | 101/066                                           |
|               |                | 3 mg/kg    | D3H60            | 36.2                                             | 65                                          | 18                                         | 107/072                                           |
|               |                | 3 mg/kg    | D3H66            | 36.5                                             | 63                                          | 18                                         | 111/068                                           |
|               |                | 3 mg/kg    | D4H72            | 36.2                                             | 72                                          | 18                                         | 115/067                                           |
|               |                | 3 mg/kg    | D7               | 36.4                                             | 75                                          | 16                                         | 147/089                                           |
|               |                | 3 mg/kg    | D14              | 36.6                                             | 80                                          | 16                                         | 135/098                                           |
|               |                | 3 mg/kg    | screening        | 39.2                                             | 84                                          | 16                                         | 098/061                                           |
|               |                | 3 mg/kg    | D1H0             | 37.4                                             | 90                                          | 18                                         | 090/050                                           |

## TSM02 Individual subject listings part 1

## CSR Appendix 16.2

| <b>SUBJID</b> | <b>INITIAL</b> | <b>ARM</b> | <b>TIMEPOINT</b> | <b>TEMP (Celsius)</b><br><i>99=Not available</i> | <b>HR (bpm)</b><br><i>999=Not available</i> | <b>RR (bpm)</b><br><i>99=Not available</i> | <b>BP (mmHg)</b><br><i>999/999= Not available</i> |
|---------------|----------------|------------|------------------|--------------------------------------------------|---------------------------------------------|--------------------------------------------|---------------------------------------------------|
|               |                | 3 mg/kg    | D1H0:30          | 37.1                                             | 76                                          | 18                                         | 102/050                                           |
|               |                | 3 mg/kg    | D1H1             | 37.1                                             | 78                                          | 18                                         | 098/051                                           |
|               |                | 3 mg/kg    | D1H1:30          | 37.3                                             | 75                                          | 18                                         | 101/054                                           |
|               |                | 3 mg/kg    | D1H2             | 37.4                                             | 76                                          | 18                                         | 096/050                                           |
|               |                | 3 mg/kg    | D1H3             | 37.6                                             | 999                                         | 99                                         | 999/999                                           |
|               |                | 3 mg/kg    | D1H4             | 38.9                                             | 87                                          | 16                                         | 089/050                                           |
|               |                | 3 mg/kg    | D1H6             | 38.8                                             | 96                                          | 18                                         | 093/051                                           |
|               |                | 3 mg/kg    | D1H8             | 39.1                                             | 999                                         | 99                                         | 999/999                                           |
|               |                | 3 mg/kg    | D1H10            | 37.7                                             | 999                                         | 99                                         | 999/999                                           |
|               |                | 3 mg/kg    | D1H12            | 35.9                                             | 57                                          | 18                                         | 090/056                                           |
|               |                | 3 mg/kg    | D1H14            | 36.5                                             | 76                                          | 18                                         | 096/055                                           |
|               |                | 3 mg/kg    | D1H18            | 36.1                                             | 62                                          | 18                                         | 085/046                                           |
|               |                | 3 mg/kg    | D1H20            | 37                                               | 74                                          | 16                                         | 089/050                                           |
|               |                | 3 mg/kg    | D2H24            | 36.6                                             | 70                                          | 18                                         | 093/051                                           |
|               |                | 3 mg/kg    | D2H30            | 37.1                                             | 83                                          | 18                                         | 090/053                                           |
|               |                | 3 mg/kg    | D2H36            | 36.1                                             | 61                                          | 18                                         | 089/054                                           |
|               |                | 3 mg/kg    | D2H42            | 36.8                                             | 78                                          | 18                                         | 094/051                                           |
|               |                | 3 mg/kg    | D3H48            | 37.3                                             | 84                                          | 18                                         | 093/051                                           |
|               |                | 3 mg/kg    | D3H54            | 36.5                                             | 73                                          | 18                                         | 089/050                                           |
|               |                | 3 mg/kg    | D3H60            | 36.3                                             | 82                                          | 18                                         | 089/049                                           |
|               |                | 3 mg/kg    | D3H66            | 36.1                                             | 81                                          | 18                                         | 090/050                                           |
|               |                | 3 mg/kg    | D4H72            | 36.2                                             | 78                                          | 18                                         | 090/045                                           |
|               |                | 3 mg/kg    | D7               | 36.2                                             | 91                                          | 18                                         | 096/063                                           |
|               |                | 3 mg/kg    | D14              | 36.7                                             | 93                                          | 16                                         | 106/063                                           |
|               |                | 3 mg/kg    | screening        | 37.2                                             | 58                                          | 16                                         | 104/060                                           |
|               |                | 3 mg/kg    | D1H0             | 37.3                                             | 82                                          | 18                                         | 092/055                                           |
|               |                | 3 mg/kg    | D1H0:30          | 38                                               | 82                                          | 18                                         | 108/066                                           |
|               |                | 3 mg/kg    | D1H1             | 38.4                                             | 86                                          | 18                                         | 116/067                                           |
|               |                | 3 mg/kg    | D1H1:30          | 38.3                                             | 84                                          | 18                                         | 112/052                                           |
|               |                | 3 mg/kg    | D1H2             | 39.3                                             | 84                                          | 18                                         | 112/062                                           |
|               |                | 3 mg/kg    | D1H3             | 38.8                                             | 86                                          | 18                                         | 113/065                                           |
|               |                | 3 mg/kg    | D1H4             | 38.3                                             | 85                                          | 18                                         | 100/051                                           |
|               |                | 3 mg/kg    | D1H6             | 36.5                                             | 80                                          | 18                                         | 120/060                                           |
|               |                | 3 mg/kg    | D1H8             | 36.3                                             | 82                                          | 18                                         | 101/063                                           |
|               |                | 3 mg/kg    | D1H10            | 36.7                                             | 70                                          | 18                                         | 098/056                                           |
|               |                | 3 mg/kg    | D1H12            | 37.3                                             | 72                                          | 18                                         | 110/054                                           |

## TSM02 Individual subject listings part 1

## CSR Appendix 16.2

| <b>SUBJID</b> | <b>INITIAL</b> | <b>ARM</b> | <b>TIMEPOINT</b> | <b>TEMP (Celsius)</b><br><i>99=Not available</i> | <b>HR (bpm)</b><br><i>999=Not available</i> | <b>RR (bpm)</b><br><i>99=Not available</i> | <b>BP (mmHg)</b><br><i>999/999= Not available</i> |
|---------------|----------------|------------|------------------|--------------------------------------------------|---------------------------------------------|--------------------------------------------|---------------------------------------------------|
|               |                | 3 mg/kg    | D1H14            | 38.8                                             | 85                                          | 18                                         | 100/052                                           |
|               |                | 3 mg/kg    | D1H18            | 37.2                                             | 77                                          | 18                                         | 107/063                                           |
|               |                | 3 mg/kg    | D1H20            | 37.3                                             | 90                                          | 18                                         | 111/067                                           |
|               |                | 3 mg/kg    | D2H24            | 38.7                                             | 91                                          | 20                                         | 110/063                                           |
|               |                | 3 mg/kg    | D2H30            | 36.6                                             | 77                                          | 18                                         | 104/066                                           |
|               |                | 3 mg/kg    | D2H36            | 37.3                                             | 77                                          | 18                                         | 104/061                                           |
|               |                | 3 mg/kg    | D2H42            | 36.4                                             | 70                                          | 18                                         | 091/062                                           |
|               |                | 3 mg/kg    | D3H48            | 36.7                                             | 80                                          | 18                                         | 102/072                                           |
|               |                | 3 mg/kg    | D3H54            | 36.4                                             | 71                                          | 18                                         | 099/058                                           |
|               |                | 3 mg/kg    | D3H60            | 36.3                                             | 76                                          | 18                                         | 102/064                                           |
|               |                | 3 mg/kg    | D3H66            | 36.2                                             | 65                                          | 18                                         | 098/059                                           |
|               |                | 3 mg/kg    | D4H72            | 36.7                                             | 76                                          | 18                                         | 105/065                                           |
|               |                | 3 mg/kg    | D7               | 36.7                                             | 76                                          | 16                                         | 108/067                                           |
|               |                | 3 mg/kg    | D14              | 36.6                                             | 74                                          | 16                                         | 114/071                                           |
|               |                | 6 mg/kg    | screening        | 36.6                                             | 53                                          | 20                                         | 111/065                                           |
|               |                | 6 mg/kg    | D1H0             | 36.6                                             | 53                                          | 20                                         | 111/065                                           |
|               |                | 6 mg/kg    | D1H0:30          | 37                                               | 59                                          | 20                                         | 108/061                                           |
|               |                | 6 mg/kg    | D1H1             | 37                                               | 69                                          | 20                                         | 110/061                                           |
|               |                | 6 mg/kg    | D1H1:30          | 37.3                                             | 80                                          | 18                                         | 105/065                                           |
|               |                | 6 mg/kg    | D1H2             | 38.1                                             | 75                                          | 20                                         | 106/053                                           |
|               |                | 6 mg/kg    | D1H3             | 37.8                                             | 75                                          | 18                                         | 105/060                                           |
|               |                | 6 mg/kg    | D1H4             | 37.6                                             | 70                                          | 18                                         | 107/063                                           |
|               |                | 6 mg/kg    | D1H6             | 36.9                                             | 56                                          | 18                                         | 107/055                                           |
|               |                | 6 mg/kg    | D1H8             | 37                                               | 60                                          | 18                                         | 110/080                                           |
|               |                | 6 mg/kg    | D1H10            | 36.9                                             | 72                                          | 18                                         | 106/076                                           |
|               |                | 6 mg/kg    | D1H12            | 36.2                                             | 52                                          | 18                                         | 096/056                                           |
|               |                | 6 mg/kg    | D1H14            | 36.8                                             | 61                                          | 18                                         | 101/068                                           |
|               |                | 6 mg/kg    | D1H18            | 38.4                                             | 71                                          | 20                                         | 121/063                                           |
|               |                | 6 mg/kg    | D1H20            | 37.3                                             | 65                                          | 20                                         | 111/071                                           |
|               |                | 6 mg/kg    | D2H24            | 37.5                                             | 61                                          | 20                                         | 101/064                                           |
|               |                | 6 mg/kg    | D2H30            | 37.1                                             | 52                                          | 18                                         | 102/061                                           |
|               |                | 6 mg/kg    | D2H36            | 36.6                                             | 56                                          | 18                                         | 101/057                                           |
|               |                | 6 mg/kg    | D2H42            | 36.7                                             | 55                                          | 18                                         | 102/058                                           |
|               |                | 6 mg/kg    | D3H48            | 36.6                                             | 54                                          | 18                                         | 105/061                                           |
|               |                | 6 mg/kg    | D3H54            | 37                                               | 53                                          | 18                                         | 106/067                                           |
|               |                | 6 mg/kg    | D3H60            | 35.8                                             | 45                                          | 18                                         | 098/059                                           |

## TSM02 Individual subject listings part 1

## CSR Appendix 16.2

| <b>SUBJID</b> | <b>INITIAL</b> | <b>ARM</b> | <b>TIMEPOINT</b> | <b>TEMP (Celsius)</b><br><i>99=Not available</i> | <b>HR (bpm)</b><br><i>999=Not available</i> | <b>RR (bpm)</b><br><i>99=Not available</i> | <b>BP (mmHg)</b><br><i>999/999= Not available</i> |
|---------------|----------------|------------|------------------|--------------------------------------------------|---------------------------------------------|--------------------------------------------|---------------------------------------------------|
|               |                | 6 mg/kg    | D3H66            | 36.3                                             | 56                                          | 18                                         | 089/052                                           |
|               |                | 6 mg/kg    | D4H72            | 36.3                                             | 61                                          | 18                                         | 092/060                                           |
|               |                | 6 mg/kg    | D7               | 36.3                                             | 67                                          | 16                                         | 102/062                                           |
|               |                | 6 mg/kg    | D14              | 36.1                                             | 64                                          | 16                                         | 121/073                                           |
|               |                | 6 mg/kg    | screening        | 37.4                                             | 67                                          | 16                                         | 103/059                                           |
|               |                | 6 mg/kg    | D1H0             | 37.4                                             | 93                                          | 18                                         | 094/053                                           |
|               |                | 6 mg/kg    | D1H0:30          | 37.2                                             | 89                                          | 18                                         | 093/056                                           |
|               |                | 6 mg/kg    | D1H1             | 37.3                                             | 89                                          | 18                                         | 092/053                                           |
|               |                | 6 mg/kg    | D1H1:30          | 37.3                                             | 89                                          | 20                                         | 091/058                                           |
|               |                | 6 mg/kg    | D1H2             | 37.4                                             | 89                                          | 20                                         | 088/059                                           |
|               |                | 6 mg/kg    | D1H3             | 37.3                                             | 85                                          | 18                                         | 086/055                                           |
|               |                | 6 mg/kg    | D1H4             | 37                                               | 82                                          | 18                                         | 086/057                                           |
|               |                | 6 mg/kg    | D1H6             | 36.7                                             | 91                                          | 18                                         | 099/054                                           |
|               |                | 6 mg/kg    | D1H8             | 37.1                                             | 84                                          | 18                                         | 096/064                                           |
|               |                | 6 mg/kg    | D1H10            | 37.2                                             | 81                                          | 18                                         | 089/050                                           |
|               |                | 6 mg/kg    | D1H12            | 37                                               | 71                                          | 18                                         | 092/056                                           |
|               |                | 6 mg/kg    | D1H14            | 37.1                                             | 80                                          | 18                                         | 087/055                                           |
|               |                | 6 mg/kg    | D1H18            | 36.3                                             | 67                                          | 18                                         | 089/053                                           |
|               |                | 6 mg/kg    | D1H20            | 36.7                                             | 71                                          | 18                                         | 091/061                                           |
|               |                | 6 mg/kg    | D2H24            | 36.9                                             | 78                                          | 18                                         | 097/055                                           |
|               |                | 6 mg/kg    | D2H30            | 36.9                                             | 73                                          | 18                                         | 112/056                                           |
|               |                | 6 mg/kg    | D2H36            | 36.6                                             | 71                                          | 18                                         | 096/054                                           |
|               |                | 6 mg/kg    | D2H42            | 36.9                                             | 68                                          | 18                                         | 096/052                                           |
|               |                | 6 mg/kg    | D3H48            | 36.8                                             | 75                                          | 18                                         | 101/056                                           |
|               |                | 6 mg/kg    | D3H54            | 36.4                                             | 71                                          | 18                                         | 095/054                                           |
|               |                | 6 mg/kg    | D3H60            | 36.6                                             | 78                                          | 18                                         | 098/050                                           |
|               |                | 6 mg/kg    | D3H66            | 35.6                                             | 61                                          | 18                                         | 083/050                                           |
|               |                | 6 mg/kg    | D4H72            | 36.7                                             | 63                                          | 18                                         | 108/066                                           |
|               |                | 6 mg/kg    | D7               | 36.2                                             | 74                                          | 16                                         | 116/067                                           |
|               |                | 6 mg/kg    | D14              | 36.5                                             | 75                                          | 18                                         | 139/073                                           |
|               |                | 6 mg/kg    | screening        | 39.1                                             | 98                                          | 16                                         | 102/061                                           |
|               |                | 6 mg/kg    | D1H0             | 36.7                                             | 87                                          | 18                                         | 099/063                                           |
|               |                | 6 mg/kg    | D1H0:30          | 37.1                                             | 95                                          | 18                                         | 090/052                                           |
|               |                | 6 mg/kg    | D1H1             | 36.9                                             | 92                                          | 18                                         | 096/046                                           |
|               |                | 6 mg/kg    | D1H1:30          | 36.8                                             | 91                                          | 18                                         | 097/051                                           |
|               |                | 6 mg/kg    | D1H2             | 37.5                                             | 93                                          | 18                                         | 095/049                                           |



## TSM02 Individual subject listings part 1

## CSR Appendix 16.2

| <b>SUBJID</b> | <b>INITIAL</b> | <b>ARM</b> | <b>TIMEPOINT</b> | <b>TEMP (Celsius)</b><br><i>99=Not available</i> | <b>HR (bpm)</b><br><i>999=Not available</i> | <b>RR (bpm)</b><br><i>99=Not available</i> | <b>BP (mmHg)</b><br><i>999/999= Not available</i> |
|---------------|----------------|------------|------------------|--------------------------------------------------|---------------------------------------------|--------------------------------------------|---------------------------------------------------|
|               |                | 6 mg/kg    | D1H3             | 38.2                                             | 90                                          | 18                                         | 089/050                                           |
|               |                | 6 mg/kg    | D1H4             | 39.5                                             | 106                                         | 20                                         | 088/040                                           |
|               |                | 6 mg/kg    | D1H6             | 37.5                                             | 86                                          | 18                                         | 084/044                                           |
|               |                | 6 mg/kg    | D1H8             | 37.1                                             | 81                                          | 18                                         | 080/045                                           |
|               |                | 6 mg/kg    | D1H10            | 36.9                                             | 86                                          | 18                                         | 092/051                                           |
|               |                | 6 mg/kg    | D1H12            | 36.7                                             | 80                                          | 18                                         | 104/055                                           |
|               |                | 6 mg/kg    | D1H14            | 36.6                                             | 79                                          | 18                                         | 098/059                                           |
|               |                | 6 mg/kg    | D1H18            | 36.6                                             | 86                                          | 18                                         | 108/070                                           |
|               |                | 6 mg/kg    | D1H20            | 36.9                                             | 77                                          | 18                                         | 099/070                                           |
|               |                | 6 mg/kg    | D2H24            | 36.7                                             | 100                                         | 18                                         | 115/078                                           |
|               |                | 6 mg/kg    | D2H30            | 36.8                                             | 92                                          | 18                                         | 101/069                                           |
|               |                | 6 mg/kg    | D2H36            | 36.3                                             | 87                                          | 18                                         | 114/075                                           |
|               |                | 6 mg/kg    | D2H42            | 36.7                                             | 90                                          | 18                                         | 107/073                                           |
|               |                | 6 mg/kg    | D3H48            | 36.8                                             | 82                                          | 18                                         | 101/065                                           |
|               |                | 6 mg/kg    | D3H54            | 36.2                                             | 74                                          | 18                                         | 119/069                                           |
|               |                | 6 mg/kg    | D3H60            | 36.1                                             | 88                                          | 18                                         | 120/073                                           |
|               |                | 6 mg/kg    | D3H66            | 37                                               | 80                                          | 18                                         | 115/071                                           |
|               |                | 6 mg/kg    | D4H72            | 37.1                                             | 88                                          | 18                                         | 099/068                                           |
|               |                | 6 mg/kg    | D5               | 36.6                                             | 78                                          | 18                                         | 096/054                                           |
|               |                | 6 mg/kg    | D7               | 36.6                                             | 67                                          | 16                                         | 110/065                                           |
|               |                | 6 mg/kg    | D14              | 36.5                                             | 98                                          | 16                                         | 137/073                                           |

## TSM02 Individual subject listings part 1

## CSR Appendix 16.2

## 16.2.7.5 ECG

| SUBJID | INITIAL | ARM       | TIMEPOINT | QTCmsec | RESULT   | RESOTHER                  |
|--------|---------|-----------|-----------|---------|----------|---------------------------|
|        |         | 1.5 mg/kg | SCREENING | 378     | Abnormal | no clinically significant |
|        |         | 1.5 mg/kg | D1H1      | 371     | Abnormal | no clinically significant |
|        |         | 1.5 mg/kg | D1H4      | 393     | Abnormal | no clinically significant |
|        |         | 1.5 mg/kg | D1H12     | 389     | Abnormal | no clinically significant |
|        |         | 1.5 mg/kg | D2        | 371     | Abnormal | no clinically significant |
|        |         | 1.5 mg/kg | D3        | 360     | Abnormal | no clinically significant |
|        |         | 1.5 mg/kg | SCREENING | 378     | Normal   |                           |
|        |         | 1.5 mg/kg | D1H1      | 411     | Normal   |                           |
|        |         | 1.5 mg/kg | D1H4      | 405     | Normal   |                           |
|        |         | 1.5 mg/kg | D1H12     | 421     | Normal   |                           |
|        |         | 1.5 mg/kg | D2        | 394     | Normal   |                           |
|        |         | 1.5 mg/kg | D3        | 403     | Normal   |                           |
|        |         | 1.5 mg/kg | SCREENING | 380     | Normal   |                           |
|        |         | 1.5 mg/kg | D1H1      | 390     | Normal   |                           |
|        |         | 1.5 mg/kg | D1H4      | 410     | Normal   |                           |
|        |         | 1.5 mg/kg | D1H12     | 376     | Normal   |                           |
|        |         | 1.5 mg/kg | D2        | 394     | Normal   |                           |
|        |         | 1.5 mg/kg | D3        | 417     | Normal   |                           |
|        |         | 3 mg/kg   | SCREENING | 415     | Normal   |                           |
|        |         | 3 mg/kg   | D1H1      | 412     | Normal   |                           |
|        |         | 3 mg/kg   | D1H4      | 416     | Normal   |                           |
|        |         | 3 mg/kg   | D1H12     | 402     | Normal   |                           |
|        |         | 3 mg/kg   | D2        | 408     | Normal   |                           |
|        |         | 3 mg/kg   | D3        | 418     | Normal   |                           |
|        |         | 3 mg/kg   | SCREENING | 408     | Normal   |                           |
|        |         | 3 mg/kg   | D1H1      | 437     | Normal   |                           |
|        |         | 3 mg/kg   | D1H4      | 418     | Normal   |                           |
|        |         | 3 mg/kg   | D1H12     | 433     | Normal   |                           |
|        |         | 3 mg/kg   | D2        | 438     | Normal   |                           |
|        |         | 3 mg/kg   | D3        | 411     | Normal   |                           |
|        |         | 3 mg/kg   | SCREENING | 420     | Normal   |                           |
|        |         | 3 mg/kg   | D1H1      | 404     | Normal   |                           |
|        |         | 3 mg/kg   | D1H4      | 407     | Normal   |                           |
|        |         | 3 mg/kg   | D1H12     | 410     | Normal   |                           |

## TSM02 Individual subject listings part 1

## CSR Appendix 16.2

| SUBJID | INITIAL | ARM     | TIMEPOINT | QTCmsec | RESULT | RESOTHER |
|--------|---------|---------|-----------|---------|--------|----------|
|        |         | 3 mg/kg | D2        | 397     | Normal |          |
|        |         | 3 mg/kg | D3        | 423     | Normal |          |
|        |         | 6 mg/kg | SCREENING | 429     | Normal |          |
|        |         | 6 mg/kg | D1H1      | 407     | Normal |          |
|        |         | 6 mg/kg | D1H4      | 402     | Normal |          |
|        |         | 6 mg/kg | D1H12     | 426     | Normal |          |
|        |         | 6 mg/kg | D2        | 413     | Normal |          |
|        |         | 6 mg/kg | D3        | 405     | Normal |          |
|        |         | 6 mg/kg | SCREENING | 390     | Normal |          |
|        |         | 6 mg/kg | D1H1      | 405     | Normal |          |
|        |         | 6 mg/kg | D1H4      | 402     | Normal |          |
|        |         | 6 mg/kg | D1H12     | 417     | Normal |          |
|        |         | 6 mg/kg | D2        | 405     | Normal |          |
|        |         | 6 mg/kg | D3        | 381     | Normal |          |
|        |         | 6 mg/kg | SCREENING | 368     | Normal |          |
|        |         | 6 mg/kg | D1H1      | 389     | Normal |          |
|        |         | 6 mg/kg | D1H4      | 368     | Normal |          |
|        |         | 6 mg/kg | D1H12     | 404     | Normal |          |
|        |         | 6 mg/kg | D2        | 385     | Normal |          |
|        |         | 6 mg/kg | D3        | 385     | Normal |          |

## 16.2.8 Listing of individual laboratory measurements by subject

## 16.2.8.1 Haematology

| SUBJID | INITIAL | ARM       | DAY | RBC<br>(10 <sup>6</sup> /μL)<br><i>99=Not available</i> | HCT<br>(%)<br><i>99=Not available</i> | HB<br>(g/dL)<br><i>99=Not available</i> | MCV<br>(fL)<br><i>999=Not available</i> | MCH<br>(pg/cell)<br><i>999=Not available</i> | MCHC<br>(pg/cell)<br><i>999=Not available</i> | WBC<br>(10 <sup>3</sup> /μL)<br><i>99=Not available</i> | NEU<br>(%)<br><i>999=Not available</i> | LYM<br>(%)<br><i>999=Not available</i> | MON<br>(%)<br><i>999=Not available</i> | EOS<br>(%)<br><i>999=Not available</i> | PLT<br>(10 <sup>3</sup> /μL)<br><i>999=Not available</i> | OTHER |
|--------|---------|-----------|-----|---------------------------------------------------------|---------------------------------------|-----------------------------------------|-----------------------------------------|----------------------------------------------|-----------------------------------------------|---------------------------------------------------------|----------------------------------------|----------------------------------------|----------------------------------------|----------------------------------------|----------------------------------------------------------|-------|
|        |         | 1.5 mg/kg | 1   | 4.96                                                    | 44.8                                  | 13.5                                    | 90.3                                    | 27.3                                         | 30.2                                          | 7.3                                                     | 83.6                                   | 7.1                                    | 6.7                                    | 1.7                                    | 84                                                       |       |
|        |         | 1.5 mg/kg | 2   | 4.19                                                    | 38                                    | 9.3                                     | 90.7                                    | 22.2                                         | 24.5                                          | 5.3                                                     | 55                                     | 15                                     | 10                                     | 20                                     | 48                                                       |       |
|        |         | 1.5 mg/kg | 3   | 4.07                                                    | 37.6                                  | 10.7                                    | 92.4                                    | 26.2                                         | 28.4                                          | 6.9                                                     | 55                                     | 33                                     | 0                                      | 12                                     | 60                                                       |       |
|        |         | 1.5 mg/kg | 4   | 99                                                      | 39                                    | 11.7                                    | 88.9                                    | 26.7                                         | 30.1                                          | 7.2                                                     | 34                                     | 21                                     | 1                                      | 44                                     | 89                                                       |       |
|        |         | 1.5 mg/kg | 5   | 99                                                      | 36.7                                  | 12.2                                    | 89.5                                    | 29.7                                         | 33.2                                          | 8.6                                                     | 43                                     | 22                                     | 10                                     | 25                                     | 119                                                      |       |
|        |         | 1.5 mg/kg | 7   | 99                                                      | 39.7                                  | 13.4                                    | 89.3                                    | 30.2                                         | 33.8                                          | 9.3                                                     | 31.8                                   | 38.1                                   | 10.7                                   | 19.2                                   | 300                                                      |       |
|        |         | 1.5 mg/kg | 14  | 99                                                      | 35.8                                  | 12.2                                    | 89.3                                    | 30.4                                         | 34                                            | 8.6                                                     | 34.6                                   | 48.3                                   | 7.2                                    | 9.5                                    | 360                                                      |       |
|        |         | 1.5 mg/kg | 1   | 4.2                                                     | 33.2                                  | 11.4                                    | 78.7                                    | 27                                           | 34.3                                          | 8.8                                                     | 87.9                                   | 7                                      | 3.4                                    | 1                                      | 89                                                       |       |
|        |         | 1.5 mg/kg | 2   | 3.5                                                     | 26.9                                  | 8.8                                     | 78                                      | 25.6                                         | 32.8                                          | 5.3                                                     | 68.3                                   | 19.6                                   | 10.2                                   | 1.2                                    | 64                                                       |       |
|        |         | 1.5 mg/kg | 3   | 3.09                                                    | 24                                    | 7.9                                     | 77.4                                    | 25.6                                         | 33                                            | 4.2                                                     | 62                                     | 27                                     | 10                                     | 1                                      | 71                                                       |       |
|        |         | 1.5 mg/kg | 4   | 3.03                                                    | 23                                    | 7.6                                     | 76                                      | 24.9                                         | 32.8                                          | 4                                                       | 51.2                                   | 36.1                                   | 11.5                                   | 0.6                                    | 99                                                       |       |
|        |         | 1.5 mg/kg | 7   | 3.2                                                     | 24.9                                  | 8.3                                     | 76.4                                    | 25.5                                         | 33.4                                          | 5.9                                                     | 55.3                                   | 31.4                                   | 9.8                                    | 2.9                                    | 240                                                      |       |
|        |         | 1.5 mg/kg | 14  | 3.5                                                     | 29.1                                  | 9.9                                     | 83.4                                    | 28.5                                         | 34.1                                          | 8                                                       | 58                                     | 34                                     | 1                                      | 7                                      | 408                                                      |       |
|        |         | 1.5 mg/kg | 1   | 4.7                                                     | 36.3                                  | 11.7                                    | 76.5                                    | 24.6                                         | 32.2                                          | 8.4                                                     | 88.2                                   | 7.8                                    | 3.5                                    | 0.3                                    | 96                                                       |       |
|        |         | 1.5 mg/kg | 2   | 4.1                                                     | 31.1                                  | 10.1                                    | 75.9                                    | 24.6                                         | 32.4                                          | 6.4                                                     | 71.3                                   | 23.4                                   | 3.8                                    | 1.3                                    | 81                                                       |       |
|        |         | 1.5 mg/kg | 3   | 4.9                                                     | 29.9                                  | 9.8                                     | 75.1                                    | 24.6                                         | 32.8                                          | 6                                                       | 58                                     | 34.6                                   | 5.6                                    | 1                                      | 72                                                       |       |
|        |         | 1.5 mg/kg | 4   | 3.9                                                     | 29.7                                  | 9.8                                     | 74.8                                    | 24.8                                         | 33.2                                          | 6.2                                                     | 51                                     | 39                                     | 10                                     | 0                                      | 100                                                      |       |
|        |         | 1.5 mg/kg | 7   | 4.5                                                     | 33.1                                  | 10.8                                    | 74.3                                    | 24.1                                         | 32.5                                          | 10.9                                                    | 43                                     | 48.3                                   | 7                                      | 1.7                                    | 349                                                      |       |

TSM02 Individual subject listings part 1

CSR Appendix 16.2

| SUBJID | INITIAL | ARM       | DAY | RBC<br>(10 <sup>6</sup> /μL)<br><i>99=Not available</i> | HCT<br>(%)<br><i>99=Not available</i> | HB<br>(g/dL)<br><i>99=Not available</i> | MCV<br>(fL)<br><i>999=Not available</i> | MCH<br>(pg/cell)<br><i>999=Not available</i> | MCHC<br>(pg/cell)<br><i>999=Not available</i> | WBC<br>(10 <sup>3</sup> / μL)<br><i>99=Not available</i> | NEU<br>(%)<br><i>999=Not available</i> | LYM<br>(%)<br><i>999=Not available</i> | MON<br>(%)<br><i>999=Not available</i> | EOS<br>(%)<br><i>999=Not available</i> | PLT<br>(10 <sup>3</sup> / μL)<br><i>999=Not available</i> | OTHER             |
|--------|---------|-----------|-----|---------------------------------------------------------|---------------------------------------|-----------------------------------------|-----------------------------------------|----------------------------------------------|-----------------------------------------------|----------------------------------------------------------|----------------------------------------|----------------------------------------|----------------------------------------|----------------------------------------|-----------------------------------------------------------|-------------------|
|        |         | 1.5 mg/kg | 14  | 4.1                                                     | 30.7                                  | 10.2                                    | 74.8                                    | 24.8                                         | 33.2                                          | 9.2                                                      | 47.3                                   | 41.8                                   | 8.3                                    | 2.4                                    | 335                                                       |                   |
|        |         | 3 mg/kg   | 1   | 5.9                                                     | 42.4                                  | 13.4                                    | 71.2                                    | 22.5                                         | 31.5                                          | 4.9                                                      | 63                                     | 27                                     | 0                                      | 10                                     | 88                                                        |                   |
|        |         | 3 mg/kg   | 2   | 4.7                                                     | 33.1                                  | 10.5                                    | 70.4                                    | 22.4                                         | 31.7                                          | 3.1                                                      | 46                                     | 35                                     | 10                                     | 9                                      | 82                                                        |                   |
|        |         | 3 mg/kg   | 3   | 4.9                                                     | 34.8                                  | 11                                      | 69.9                                    | 22.1                                         | 31.6                                          | 3.6                                                      | 29                                     | 52                                     | 3                                      | 16                                     | 114                                                       |                   |
|        |         | 3 mg/kg   | 4   | 5.47                                                    | 38.1                                  | 12.4                                    | 69.7                                    | 22.7                                         | 32.5                                          | 5.8                                                      | 38                                     | 36                                     | 10                                     | 16                                     | 138                                                       |                   |
|        |         | 3 mg/kg   | 7   | 5.4                                                     | 38.5                                  | 12.2                                    | 71.6                                    | 22.8                                         | 31.8                                          | 5.8                                                      | 39.5                                   | 40.2                                   | 5.1                                    | 13.3                                   | 242                                                       |                   |
|        |         | 3 mg/kg   | 14  | 5.4                                                     | 38.4                                  | 12.3                                    | 71.5                                    | 22.9                                         | 32                                            | 6.8                                                      | 43.9                                   | 38.3                                   | 5.5                                    | 12.3                                   | 291                                                       |                   |
|        |         | 3 mg/kg   | 1   | 3.8                                                     | 32                                    | 8.2                                     | 63.4                                    | 21.1                                         | 33.3                                          | 5.4                                                      | 31                                     | 65                                     | 4                                      | 0                                      | 202                                                       |                   |
|        |         | 3 mg/kg   | 2   | 3.1                                                     | 19.7                                  | 6.6                                     | 63.4                                    | 21.1                                         | 33.3                                          | 3.2                                                      | 42                                     | 49                                     | 1                                      | 6                                      | 184                                                       |                   |
|        |         | 3 mg/kg   | 3   | 3.1                                                     | 20.1                                  | 6.7                                     | 64.4                                    | 21.6                                         | 33.5                                          | 3.4                                                      | 60                                     | 38                                     | 1                                      | 1                                      | 127                                                       |                   |
|        |         | 3 mg/kg   | 4   | 3.5                                                     | 22.8                                  | 7.7                                     | 64.7                                    | 21.8                                         | 33.7                                          | 4.4                                                      | 33                                     | 65                                     | 0                                      | 2                                      | 202                                                       |                   |
|        |         | 3 mg/kg   | 7   | 4.5                                                     | 30.5                                  | 10                                      | 68.1                                    | 22.3                                         | 32.7                                          | 6.3                                                      | 32                                     | 58                                     | 5                                      | 5                                      | 386                                                       |                   |
|        |         | 3 mg/kg   | 14  | 4.5                                                     | 30.8                                  | 10.2                                    | 69.1                                    | 22.8                                         | 33.1                                          | 8.8                                                      | 48.4                                   | 39.7                                   | 6.7                                    | 4.9                                    | 207                                                       |                   |
|        |         | 3 mg/kg   | 1   | 3.4                                                     | 35.2                                  | 15.4                                    | 102.5                                   | 44.9                                         | 43.9                                          | 8.4                                                      | 72.6                                   | 16.6                                   | 7.9                                    | 2.9                                    | 120                                                       |                   |
|        |         | 3 mg/kg   | 2   | 2.5                                                     | 27.7                                  | 12.6                                    | 108                                     | 49.1                                         | 45.5                                          | 7.6                                                      | 70                                     | 18                                     | 10                                     | 2                                      | 66                                                        | HCT 39%<br>repeat |
|        |         | 3 mg/kg   | 3   | 3.4                                                     | 34.3                                  | 13.2                                    | 102.4                                   | 39.3                                         | 38.3                                          | 7.8                                                      | 62                                     | 23                                     | 10                                     | 5                                      | 64                                                        |                   |
|        |         | 3 mg/kg   | 4   | 2.1                                                     | 38                                    | 12.9                                    | 112.2                                   | 61.9                                         | 55.2                                          | 15                                                       | 75.9                                   | 10.5                                   | 6.6                                    | 6.4                                    | 85                                                        |                   |
|        |         | 3 mg/kg   | 7   | 1.4                                                     | 34                                    | 11.7                                    | 112.1                                   | 83                                           | 74                                            | 7.7                                                      | 44.4                                   | 35.9                                   | 8.4                                    | 11.1                                   | 162                                                       |                   |
|        |         | 3 mg/kg   | 14  | 2.1                                                     | 36                                    | 12.6                                    | 104.5                                   | 60.5                                         | 57.8                                          | 10.1                                                     | 61                                     | 34                                     | 0                                      | 5                                      | 306                                                       |                   |
|        |         | 6 mg/kg   | 1   | 5.1                                                     | 40.1                                  | 13.2                                    | 78.7                                    | 25.8                                         | 32.8                                          | 7                                                        | 49                                     | 34                                     | 10                                     | 7                                      | 179                                                       |                   |
|        |         | 6 mg/kg   | 2   | 4.3                                                     | 33.9                                  | 11                                      | 78.5                                    | 25.6                                         | 32.6                                          | 6                                                        | 57                                     | 26                                     | 10                                     | 7                                      | 131                                                       |                   |

TSM02 Individual subject listings part 1

CSR Appendix 16.2

| <b>SUBJID</b> | <b>INITIAL</b> | <b>ARM</b> | <b>DAY</b> | <b>RBC</b><br>(10 <sup>6</sup> /μL)<br><i>99=Not available</i> | <b>HCT</b><br>(%)<br><i>99=Not available</i> | <b>HB</b><br>(g/dL)<br><i>99=Not available</i> | <b>MCV</b><br>(fL)<br><i>999=Not available</i> | <b>MCH</b><br>(pg/cell)<br><i>999=Not available</i> | <b>MCHC</b><br>(pg/cell)<br><i>999=Not available</i> | <b>WBC</b><br>(10 <sup>3</sup> / μL)<br><i>99=Not available</i> | <b>NEU</b><br>(%)<br><i>999=Not available</i> | <b>LYM</b><br>(%)<br><i>999=Not available</i> | <b>MON</b><br>(%)<br><i>999=Not available</i> | <b>EOS</b><br>(%)<br><i>999=Not available</i> | <b>PLT</b><br>(10 <sup>3</sup> / μL)<br><i>999=Not available</i> | <b>OTHER</b> |
|---------------|----------------|------------|------------|----------------------------------------------------------------|----------------------------------------------|------------------------------------------------|------------------------------------------------|-----------------------------------------------------|------------------------------------------------------|-----------------------------------------------------------------|-----------------------------------------------|-----------------------------------------------|-----------------------------------------------|-----------------------------------------------|------------------------------------------------------------------|--------------|
|               |                | 6 mg/kg    | 3          | 4.4                                                            | 33.9                                         | 11.1                                           | 77.4                                           | 25.4                                                | 32.8                                                 | 5.6                                                             | 47                                            | 50                                            | 0                                             | 3                                             | 125                                                              |              |
|               |                | 6 mg/kg    | 7          | 4.9                                                            | 37.5                                         | 12.8                                           | 76.4                                           | 26.1                                                | 34.1                                                 | 8.5                                                             | 33                                            | 45.1                                          | 7                                             | 14.6                                          | 187                                                              |              |
|               |                | 6 mg/kg    | 14         | 4.8                                                            | 37.7                                         | 12.5                                           | 77.1                                           | 25.6                                                | 33.2                                                 | 10.4                                                            | 40.4                                          | 33.9                                          | 7.7                                           | 17.3                                          | 185                                                              |              |
|               |                | 6 mg/kg    | 1          | 6.2                                                            | 33                                           | 10.5                                           | 53.1                                           | 16.9                                                | 31.8                                                 | 9.6                                                             | 76                                            | 14                                            | 0                                             | 1                                             | 169                                                              |              |
|               |                | 6 mg/kg    | 2          | 5.6                                                            | 29.2                                         | 9.6                                            | 52.3                                           | 17.1                                                | 32.7                                                 | 6.1                                                             | 44                                            | 52                                            | 0                                             | 4                                             | 133                                                              |              |
|               |                | 6 mg/kg    | 3          | 5.2                                                            | 26.4                                         | 8.7                                            | 51.4                                           | 16.9                                                | 32.9                                                 | 6.5                                                             | 62                                            | 33                                            | 4                                             | 1                                             | 301                                                              |              |
|               |                | 6 mg/kg    | 7          | 5.02                                                           | 26.2                                         | 8.4                                            | 52.1                                           | 16.7                                                | 31.9                                                 | 10.5                                                            | 49                                            | 36                                            | 2                                             | 13                                            | 299                                                              |              |
|               |                | 6 mg/kg    | 14         | 5.41                                                           | 28.9                                         | 9.1                                            | 53.4                                           | 26.8                                                | 31.5                                                 | 11.3                                                            | 56                                            | 38                                            | 0                                             | 6                                             | 562                                                              |              |
|               |                | 6 mg/kg    | 1          | 4.1                                                            | 27.3                                         | 8.9                                            | 66.5                                           | 21.6                                                | 32.5                                                 | 5.5                                                             | 48                                            | 35                                            | 10                                            | 7                                             | 112                                                              |              |
|               |                | 6 mg/kg    | 2          | 3.6                                                            | 24.9                                         | 7.9                                            | 69.5                                           | 22.1                                                | 31.8                                                 | 4                                                               | 41                                            | 43                                            | 10                                            | 6                                             | 130                                                              |              |
|               |                | 6 mg/kg    | 3          | 3.4                                                            | 22.7                                         | 7.4                                            | 66                                             | 21.6                                                | 32.7                                                 | 4.3                                                             | 43                                            | 48                                            | 0                                             | 9                                             | 70                                                               |              |
|               |                | 6 mg/kg    | 4          | 3.2                                                            | 21.4                                         | 7                                              | 66.3                                           | 21.6                                                | 32.5                                                 | 5.6                                                             | 37                                            | 50                                            | 4                                             | 9                                             | 149                                                              |              |
|               |                | 6 mg/kg    | 7          | 3.7                                                            | 25.2                                         | 8.2                                            | 67.7                                           | 21.9                                                | 32.3                                                 | 5.7                                                             | 47.1                                          | 33.3                                          | 9.9                                           | 9.4                                           | 303                                                              |              |
|               |                | 6 mg/kg    | 14         | 3.1                                                            | 24.4                                         | 8.6                                            | 77.7                                           | 27.2                                                | 35                                                   | 5.4                                                             | 40.7                                          | 40.6                                          | 11                                            | 7.5                                           | 262                                                              |              |

TSM02 Individual subject listings part 1

CSR Appendix 16.2

16.2.8.1 Biochemistry

| <b>SUBJID</b> | <b>INITIAL</b> | <b>ARM</b> | <b>DAY</b> | <b>GLUC</b><br>(mg/dL)<br>999=<br>Not available | <b>BUN</b><br>(mg/dL)<br>999=<br>Not available | <b>CREAT</b><br>(mg/dL)<br>99=<br>Not available | <b>BILI</b><br>(mg/dL)<br>99=<br>Not available | <b>AST</b><br>(U/L)<br>9999=<br>Not available | <b>ALT</b><br>(U/L)<br>9999=<br>Not available | <b>ALP</b><br>(U/L)<br>9999=<br>Not available | <b>SODIUM</b><br>(mmol/L)<br>999=<br>Not available | <b>K</b><br>(mmol/L)<br>99=<br>Not available | <b>CL</b><br>(mmol/L)<br>999=<br>Not available | <b>CO2</b><br>(mmol/L)<br>999=<br>Not available | <b>CA</b><br>(mmol/L)<br>99=<br>Not available | <b>CK</b><br>(U/L)<br>9999=<br>Not available | <b>LDH</b><br>(U/L)<br>9999=<br>Not available |
|---------------|----------------|------------|------------|-------------------------------------------------|------------------------------------------------|-------------------------------------------------|------------------------------------------------|-----------------------------------------------|-----------------------------------------------|-----------------------------------------------|----------------------------------------------------|----------------------------------------------|------------------------------------------------|-------------------------------------------------|-----------------------------------------------|----------------------------------------------|-----------------------------------------------|
|               |                | 1.5 mg/kg  | 1          | 182                                             | 12.9                                           | 0.9                                             | 1.3                                            | 39                                            | 44                                            | 80                                            | 132                                                | 3.6                                          | 97.9                                           | 23                                              | 7.8                                           | 99                                           | 326                                           |
|               |                | 1.5 mg/kg  | 2          | 154                                             | 7.3                                            | 0.7                                             | 1.3                                            | 23                                            | 35                                            | 53                                            | 133.8                                              | 3                                            | 105.5                                          | 21                                              | 6.7                                           | 72                                           | 276                                           |
|               |                | 1.5 mg/kg  | 3          | 154                                             | 6.4                                            | 0.6                                             | 0.8                                            | 18                                            | 29                                            | 58                                            | 132.5                                              | 2.7                                          | 102.4                                          | 23                                              | 7                                             | 46                                           | 225                                           |
|               |                | 1.5 mg/kg  | 4          | 999                                             | 4.6                                            | 0.5                                             | 0.6                                            | 28                                            | 34                                            | 52                                            | 136.5                                              | 3.3                                          | 103.4                                          | 22                                              | 7.2                                           | 30                                           | 287                                           |
|               |                | 1.5 mg/kg  | 7          | 118                                             | 5.4                                            | 0.7                                             | 0.4                                            | 23                                            | 49                                            | 66                                            | 137.6                                              | 3.9                                          | 102.7                                          | 25                                              | 8.1                                           | 60                                           | 250                                           |
|               |                | 1.5 mg/kg  | 14         | 92                                              | 5                                              | 0.7                                             | 0.45                                           | 22                                            | 37                                            | 72                                            | 142.4                                              | 4.1                                          | 105.8                                          | 29                                              | 8.4                                           | 54                                           | 280                                           |
|               |                | 1.5 mg/kg  | 1          | 121                                             | 13.4                                           | 0.8                                             | 1.3                                            | 30                                            | 25                                            | 87                                            | 134.9                                              | 3.9                                          | 99.6                                           | 25                                              | 8                                             | 47                                           | 256                                           |
|               |                | 1.5 mg/kg  | 2          | 115                                             | 8.6                                            | 0.6                                             | 0.5                                            | 23                                            | 18                                            | 66                                            | 136                                                | 3.1                                          | 105.3                                          | 22                                              | 7.8                                           | 36                                           | 250                                           |
|               |                | 1.5 mg/kg  | 3          | 103                                             | 5.1                                            | 0.6                                             | 0.8                                            | 18                                            | 15                                            | 60                                            | 132.9                                              | 3                                            | 102.3                                          | 26                                              | 7.4                                           | 34                                           | 307                                           |
|               |                | 1.5 mg/kg  | 4          | 999                                             | 999                                            | 99                                              | 99                                             | 9999                                          | 9999                                          | 9999                                          | 139.5                                              | 3.02                                         | 107.5                                          | 24                                              | 6.9                                           | 9999                                         | 9999                                          |
|               |                | 1.5 mg/kg  | 7          | 102                                             | 3.6                                            | 0.6                                             | 0.3                                            | 93                                            | 90                                            | 145                                           | 144.6                                              | 3.8                                          | 108                                            | 30                                              | 7.8                                           | 42                                           | 325                                           |
|               |                | 1.5 mg/kg  | 14         | 107                                             | 8                                              | 0.7                                             | 0.4                                            | 26                                            | 36                                            | 125                                           | 143.8                                              | 4.6                                          | 106                                            | 26                                              | 9.2                                           | 50                                           | 288                                           |
|               |                | 1.5 mg/kg  | 1          | 141                                             | 9.8                                            | 1.1                                             | 0.9                                            | 25                                            | 26                                            | 59                                            | 132.7                                              | 4                                            | 97.9                                           | 27                                              | 8                                             | 143                                          | 235                                           |
|               |                | 1.5 mg/kg  | 2          | 128                                             | 7                                              | 0.9                                             | 0.4                                            | 16                                            | 18                                            | 63                                            | 136.3                                              | 4                                            | 104.6                                          | 25                                              | 7.1                                           | 57                                           | 167                                           |
|               |                | 1.5 mg/kg  | 3          | 131                                             | 5.8                                            | 0.9                                             | 0.5                                            | 14                                            | 16                                            | 66                                            | 136.6                                              | 3.7                                          | 105.4                                          | 30                                              | 7.5                                           | 23                                           | 158                                           |
|               |                | 1.5 mg/kg  | 4          | 105                                             | 5.2                                            | 0.9                                             | 0.3                                            | 20                                            | 18                                            | 74                                            | 138.6                                              | 3.6                                          | 103.8                                          | 25                                              | 8.2                                           | 15                                           | 159                                           |
|               |                | 1.5 mg/kg  | 7          | 121                                             | 9.1                                            | 0.9                                             | 0.4                                            | 34                                            | 54                                            | 73                                            | 141                                                | 4.7                                          | 101.8                                          | 32                                              | 8.3                                           | 32                                           | 177                                           |
|               |                | 1.5 mg/kg  | 14         | 106                                             | 11.6                                           | 1                                               | 0.4                                            | 22                                            | 27                                            | 67                                            | 139.5                                              | 4.7                                          | 103.2                                          | 29                                              | 8.6                                           | 102                                          | 181                                           |

TSM02 Individual subject listings part 1

CSR Appendix 16.2

| <b>SUBJID</b> | <b>INITIAL</b> | <b>ARM</b> | <b>DAY</b> | <b>GLUC</b><br>(mg/dL)<br>999=<br><i>Not available</i> | <b>BUN</b><br>(mg/dL)<br>999=<br><i>Not available</i> | <b>CREAT</b><br>(mg/dL)<br>99=<br><i>Not available</i> | <b>BILI</b><br>(mg/dL)<br>99=<br><i>Not available</i> | <b>AST</b><br>(U/L)<br>9999=<br><i>Not available</i> | <b>ALT</b><br>(U/L)<br>9999=<br><i>Not available</i> | <b>ALP</b><br>(U/L)<br>9999=<br><i>Not available</i> | <b>SODIUM</b><br>(mmol/L)<br>999=<br><i>Not available</i> | <b>K</b><br>(mmol/L)<br>99=<br><i>Not available</i> | <b>CL</b><br>(mmol/L)<br>999=<br><i>Not available</i> | <b>CO2</b><br>(mmol/L)<br>999=<br><i>Not available</i> | <b>CA</b><br>(mmol/L)<br>99=<br><i>Not available</i> | <b>CK</b><br>(U/L)<br>9999=<br><i>Not available</i> | <b>LDH</b><br>(U/L)<br>9999=<br><i>Not available</i> |
|---------------|----------------|------------|------------|--------------------------------------------------------|-------------------------------------------------------|--------------------------------------------------------|-------------------------------------------------------|------------------------------------------------------|------------------------------------------------------|------------------------------------------------------|-----------------------------------------------------------|-----------------------------------------------------|-------------------------------------------------------|--------------------------------------------------------|------------------------------------------------------|-----------------------------------------------------|------------------------------------------------------|
|               |                | 3 mg/kg    | 1          | 118                                                    | 19.4                                                  | 0.9                                                    | 0.7                                                   | 31                                                   | 31                                                   | 97                                                   | 131.5                                                     | 4.4                                                 | 97.3                                                  | 29                                                     | 8                                                    | 67                                                  | 219                                                  |
|               |                | 3 mg/kg    | 2          | 131                                                    | 13.8                                                  | 0.7                                                    | 0.5                                                   | 19                                                   | 20                                                   | 69                                                   | 136                                                       | 3.6                                                 | 105.9                                                 | 27                                                     | 6.7                                                  | 44                                                  | 173                                                  |
|               |                | 3 mg/kg    | 3          | 121                                                    | 7.8                                                   | 0.7                                                    | 99                                                    | 18                                                   | 23                                                   | 71                                                   | 136.9                                                     | 3.9                                                 | 104.7                                                 | 30                                                     | 8                                                    | 35                                                  | 178                                                  |
|               |                | 3 mg/kg    | 4          | 100                                                    | 10.9                                                  | 0.8                                                    | 0.2                                                   | 37                                                   | 35                                                   | 81                                                   | 140.4                                                     | 4.3                                                 | 103.9                                                 | 27                                                     | 9.2                                                  | 46                                                  | 190                                                  |
|               |                | 3 mg/kg    | 7          | 91                                                     | 11.2                                                  | 0.7                                                    | 0.3                                                   | 53                                                   | 88                                                   | 80                                                   | 139.2                                                     | 4.7                                                 | 101.4                                                 | 32                                                     | 9.4                                                  | 48                                                  | 247                                                  |
|               |                | 3 mg/kg    | 14         | 93                                                     | 9.6                                                   | 0.7                                                    | 0.3                                                   | 46                                                   | 75                                                   | 90                                                   | 140.8                                                     | 5.1                                                 | 104.2                                                 | 29                                                     | 9                                                    | 83                                                  | 213                                                  |
|               |                | 3 mg/kg    | 1          | 125                                                    | 7.4                                                   | 1                                                      | 0.6                                                   | 25                                                   | 16                                                   | 52                                                   | 130.3                                                     | 4.8                                                 | 101.1                                                 | 22                                                     | 7.5                                                  | 41                                                  | 495                                                  |
|               |                | 3 mg/kg    | 2          | 98                                                     | 6.3                                                   | 0.7                                                    | 0.4                                                   | 20                                                   | 8                                                    | 44                                                   | 136.9                                                     | 4                                                   | 109.1                                                 | 23                                                     | 7.5                                                  | 30                                                  | 430                                                  |
|               |                | 3 mg/kg    | 3          | 115                                                    | 4.8                                                   | 0.7                                                    | 0.3                                                   | 27                                                   | 17                                                   | 52                                                   | 136.5                                                     | 3.8                                                 | 107.9                                                 | 23                                                     | 7.6                                                  | 27                                                  | 408                                                  |
|               |                | 3 mg/kg    | 4          | 110                                                    | 4.9                                                   | 0.7                                                    | 0.4                                                   | 39                                                   | 20                                                   | 18                                                   | 142.5                                                     | 4.4                                                 | 111.8                                                 | 23                                                     | 8.1                                                  | 29                                                  | 475                                                  |
|               |                | 3 mg/kg    | 7          | 70                                                     | 6.3                                                   | 0.8                                                    | 0.4                                                   | 38                                                   | 41                                                   | 73                                                   | 140.4                                                     | 4.6                                                 | 103.2                                                 | 30                                                     | 9.4                                                  | 44                                                  | 377                                                  |
|               |                | 3 mg/kg    | 14         | 133                                                    | 8.2                                                   | 0.8                                                    | 0.4                                                   | 27                                                   | 23                                                   | 82                                                   | 140                                                       | 4.3                                                 | 102.7                                                 | 30                                                     | 9.1                                                  | 51                                                  | 296                                                  |
|               |                | 3 mg/kg    | 1          | 142                                                    | 33.1                                                  | 0.9                                                    | 0.5                                                   | 20                                                   | 34                                                   | 86                                                   | 139                                                       | 4                                                   | 104.4                                                 | 23                                                     | 8.4                                                  | 29                                                  | 194                                                  |
|               |                | 3 mg/kg    | 2          | 104                                                    | 21.4                                                  | 0.9                                                    | 0.5                                                   | 30                                                   | 40                                                   | 76                                                   | 137.5                                                     | 3.2                                                 | 107.7                                                 | 20                                                     | 7.7                                                  | 24                                                  | 165                                                  |
|               |                | 3 mg/kg    | 3          | 76                                                     | 18.7                                                  | 0.7                                                    | 0.5                                                   | 23                                                   | 38                                                   | 81                                                   | 137.5                                                     | 3.3                                                 | 106.6                                                 | 20                                                     | 7.8                                                  | 18                                                  | 197                                                  |
|               |                | 3 mg/kg    | 4          | 73                                                     | 20.9                                                  | 0.7                                                    | 0.4                                                   | 26                                                   | 35                                                   | 103                                                  | 137.7                                                     | 3.5                                                 | 108.5                                                 | 20                                                     | 7.9                                                  | 16                                                  | 217                                                  |
|               |                | 3 mg/kg    | 7          | 113                                                    | 14.5                                                  | 0.7                                                    | 0.3                                                   | 87                                                   | 104                                                  | 104                                                  | 142.2                                                     | 3.5                                                 | 104.9                                                 | 30                                                     | 8.2                                                  | 40                                                  | 245                                                  |
|               |                | 3 mg/kg    | 14         | 124                                                    | 11.1                                                  | 0.8                                                    | 0.5                                                   | 24                                                   | 54                                                   | 83                                                   | 143.4                                                     | 5.7                                                 | 107.2                                                 | 29                                                     | 8.4                                                  | 49                                                  | 260                                                  |
|               |                | 6 mg/kg    | 1          | 113                                                    | 13.9                                                  | 0.9                                                    | 0.8                                                   | 20                                                   | 19                                                   | 70                                                   | 143                                                       | 4.3                                                 | 105.5                                                 | 26                                                     | 9                                                    | 69                                                  | 183                                                  |
|               |                | 6 mg/kg    | 2          | 106                                                    | 6.9                                                   | 0.9                                                    | 1.1                                                   | 21                                                   | 12                                                   | 53                                                   | 138.7                                                     | 3.2                                                 | 107.6                                                 | 24                                                     | 8.4                                                  | 56                                                  | 245                                                  |
|               |                | 6 mg/kg    | 3          | 96                                                     | 7.3                                                   | 0.9                                                    | 0.9                                                   | 18                                                   | 14                                                   | 51                                                   | 138.3                                                     | 3.8                                                 | 106                                                   | 24.1                                                   | 8.4                                                  | 45                                                  | 255                                                  |



TSM02 Individual subject listings part 1

CSR Appendix 16.2

| <b>SUBJID</b> | <b>INITIAL</b> | <b>ARM</b> | <b>DAY</b> | <b>GLUC</b><br>(mg/dL)<br>999=<br><i>Not available</i> | <b>BUN</b><br>(mg/dL)<br>999=<br><i>Not available</i> | <b>CREAT</b><br>(mg/dL)<br>99=<br><i>Not available</i> | <b>BILI</b><br>(mg/dL)<br>99=<br><i>Not available</i> | <b>AST</b><br>(U/L)<br>9999=<br><i>Not available</i> | <b>ALT</b><br>(U/L)<br>9999=<br><i>Not available</i> | <b>ALP</b><br>(U/L)<br>9999=<br><i>Not available</i> | <b>SODIUM</b><br>(mmol/L)<br>999=<br><i>Not available</i> | <b>K</b><br>(mmol/L)<br>99=<br><i>Not available</i> | <b>CL</b><br>(mmol/L)<br>999=<br><i>Not available</i> | <b>CO2</b><br>(mmol/L)<br>999=<br><i>Not available</i> | <b>CA</b><br>(mmol/L)<br>99=<br><i>Not available</i> | <b>CK</b><br>(U/L)<br>9999=<br><i>Not available</i> | <b>LDH</b><br>(U/L)<br>9999=<br><i>Not available</i> |
|---------------|----------------|------------|------------|--------------------------------------------------------|-------------------------------------------------------|--------------------------------------------------------|-------------------------------------------------------|------------------------------------------------------|------------------------------------------------------|------------------------------------------------------|-----------------------------------------------------------|-----------------------------------------------------|-------------------------------------------------------|--------------------------------------------------------|------------------------------------------------------|-----------------------------------------------------|------------------------------------------------------|
|               |                | 6 mg/kg    | 7          | 82                                                     | 13                                                    | 0.9                                                    | 0.9                                                   | 75                                                   | 73                                                   | 62                                                   | 139.8                                                     | 4.6                                                 | 103.4                                                 | 28.6                                                   | 9.2                                                  | 49                                                  | 248                                                  |
|               |                | 6 mg/kg    | 14         | 100                                                    | 9.1                                                   | 0.9                                                    | 0.7                                                   | 28                                                   | 26                                                   | 56                                                   | 140.9                                                     | 4.7                                                 | 105.1                                                 | 31.5                                                   | 8.9                                                  | 80                                                  | 234                                                  |
|               |                | 6 mg/kg    | 1          | 119                                                    | 19.3                                                  | 1.3                                                    | 1.7                                                   | 43                                                   | 53                                                   | 92                                                   | 132                                                       | 3.6                                                 | 101.1                                                 | 19.4                                                   | 8.6                                                  | 45                                                  | 186                                                  |
|               |                | 6 mg/kg    | 2          | 93                                                     | 18.1                                                  | 1.1                                                    | 0.9                                                   | 29                                                   | 34                                                   | 94                                                   | 134.6                                                     | 6.3                                                 | 105.1                                                 | 21.3                                                   | 8.1                                                  | 27                                                  | 178                                                  |
|               |                | 6 mg/kg    | 3          | 116                                                    | 16                                                    | 1                                                      | 0.6                                                   | 27                                                   | 32                                                   | 95                                                   | 137.9                                                     | 3.7                                                 | 108.9                                                 | 20.2                                                   | 8.4                                                  | 22                                                  | 158                                                  |
|               |                | 6 mg/kg    | 7          | 130                                                    | 11.9                                                  | 1.1                                                    | 0.47                                                  | 136                                                  | 157                                                  | 113                                                  | 134.9                                                     | 4.12                                                | 104.7                                                 | 24.4                                                   | 8.4                                                  | 38                                                  | 215                                                  |
|               |                | 6 mg/kg    | 14         | 85                                                     | 13.1                                                  | 0.9                                                    | 0.56                                                  | 25                                                   | 47                                                   | 81                                                   | 140.1                                                     | 4.26                                                | 107.1                                                 | 25                                                     | 8.8                                                  | 67                                                  | 188                                                  |
|               |                | 6 mg/kg    | 1          | 116                                                    | 19                                                    | 0.8                                                    | 1.1                                                   | 17                                                   | 15                                                   | 83                                                   | 134.2                                                     | 3.5                                                 | 101.7                                                 | 24.8                                                   | 8.4                                                  | 64                                                  | 164                                                  |
|               |                | 6 mg/kg    | 2          | 112                                                    | 9.8                                                   | 0.7                                                    | 0.7                                                   | 16                                                   | 13                                                   | 9999                                                 | 138.5                                                     | 3.9                                                 | 108.3                                                 | 24.4                                                   | 7.8                                                  | 55                                                  | 223                                                  |
|               |                | 6 mg/kg    | 3          | 115                                                    | 7.3                                                   | 0.6                                                    | 0.6                                                   | 14                                                   | 11                                                   | 65                                                   | 137.8                                                     | 3.6                                                 | 108.9                                                 | 20.7                                                   | 7.9                                                  | 40                                                  | 216                                                  |
|               |                | 6 mg/kg    | 7          | 127                                                    | 12.9                                                  | 0.7                                                    | 0.5                                                   | 72                                                   | 71                                                   | 83                                                   | 136.9                                                     | 4.7                                                 | 102.5                                                 | 27.2                                                   | 9                                                    | 32                                                  | 190                                                  |
|               |                | 6 mg/kg    | 14         | 98                                                     | 9.2                                                   | 0.7                                                    | 0.6                                                   | 25                                                   | 28                                                   | 97                                                   | 141.2                                                     | 4.5                                                 | 106.7                                                 | 26.4                                                   | 9                                                    | 76                                                  | 216                                                  |

## TSM02 Individual subject listings part 1

## CSR Appendix 16.2

## 16.2.8.2 Coagulation tests

| SUBJID | INITIAL | ARM       | TIMEPOINT   | APTT | PT   | INR  |
|--------|---------|-----------|-------------|------|------|------|
|        |         | 1.5 mg/kg | SCREENING   | 27.5 | 12.9 | 1.08 |
|        |         | 1.5 mg/kg | D1H1        | 39.2 | 12.4 | 1.03 |
|        |         | 1.5 mg/kg | D1H2        | 33.8 | 10.9 | 0.91 |
|        |         | 1.5 mg/kg | D1H5        | 27.8 | 11.7 | 0.98 |
|        |         | 1.5 mg/kg | D1H11       | 26.2 | 11.5 | 0.96 |
|        |         | 1.5 mg/kg | D1H17       | 26   | 11   | 0.92 |
|        |         | 1.5 mg/kg | D1H23       | 28   | 12.1 | 1.01 |
|        |         | 1.5 mg/kg | D2H26       | 32.7 | 12.5 | 1.04 |
|        |         | 1.5 mg/kg | D2H29       | 29   | 11.8 | 0.98 |
|        |         | 1.5 mg/kg | D2predose6  | 26.2 | 11.2 | 0.93 |
|        |         | 1.5 mg/kg | D2H31       | 37.9 | 12.8 | 1.07 |
|        |         | 1.5 mg/kg | D2H32       | 34   | 12   | 1    |
|        |         | 1.5 mg/kg | D2H35       | 30.7 | 12.1 | 1.01 |
|        |         | 1.5 mg/kg | D2H41       | 31.4 | 12.1 | 1.01 |
|        |         | 1.5 mg/kg | D2H47       | 23.8 | 10.6 | 0.88 |
|        |         | 1.5 mg/kg | D3H53       | 27.3 | 11.3 | 0.94 |
|        |         | 1.5 mg/kg | D3H59       | 26.5 | 10.4 | 0.87 |
|        |         | 1.5 mg/kg | D3H65       | 27.4 | 10.2 | 0.95 |
|        |         | 1.5 mg/kg | D3predose12 | 26.7 | 10.1 | 0.84 |
|        |         | 1.5 mg/kg | D3H67       | 40.7 | 11.5 | 0.96 |
|        |         | 1.5 mg/kg | D3H68       | 29.7 | 12.5 | 1.04 |
|        |         | 1.5 mg/kg | D3H71       | 25.3 | 15.1 | 1.25 |
|        |         | 1.5 mg/kg | D7          | 22.9 | 11.2 | 0.93 |
|        |         | 1.5 mg/kg | D14         | 26.2 | 9.8  | 0.82 |
|        |         | 1.5 mg/kg | SCREENING   | 29.1 | 12.4 | 1.03 |
|        |         | 1.5 mg/kg | D1H1        | 46.9 | 13   | 1.08 |
|        |         | 1.5 mg/kg | D1H2        | 34.5 | 12   | 1    |
|        |         | 1.5 mg/kg | D1H5        | 31.3 | 12.3 | 1.02 |
|        |         | 1.5 mg/kg | D1H11       | 30.6 | 12.7 | 1.06 |
|        |         | 1.5 mg/kg | D1H17       | 31.1 | 12.4 | 1.03 |
|        |         | 1.5 mg/kg | D1H23       | 31.2 | 12.2 | 1.02 |
|        |         | 1.5 mg/kg | D2H26       | 36.6 | 11.3 | 0.94 |
|        |         | 1.5 mg/kg | D2H29       | 31.4 | 11.7 | 0.98 |
|        |         | 1.5 mg/kg | D2predose6  | 31.4 | 11.8 | 0.98 |
|        |         | 1.5 mg/kg | D2H31       | 49   | 12   | 1    |

## TSM02 Individual subject listings part 1

## CSR Appendix 16.2

| SUBJID | INITIAL | ARM       | TIMEPOINT   | APTT | PT   | INR  |
|--------|---------|-----------|-------------|------|------|------|
|        |         | 1.5 mg/kg | D2H32       | 46.9 | 11.6 | 0.97 |
|        |         | 1.5 mg/kg | D2H35       | 31.4 | 11.6 | 0.97 |
|        |         | 1.5 mg/kg | D2H41       | 31.6 | 12.4 | 1.03 |
|        |         | 1.5 mg/kg | D2H47       | 33.1 | 12.5 | 1.04 |
|        |         | 1.5 mg/kg | D3H53       | 31.9 | 12.5 | 1.04 |
|        |         | 1.5 mg/kg | D3H59       | 29.7 | 12.6 | 1.05 |
|        |         | 1.5 mg/kg | D3H65       | 31.1 | 12.3 | 1.02 |
|        |         | 1.5 mg/kg | D3predose12 | 29.5 | 12.8 | 1.07 |
|        |         | 1.5 mg/kg | D3H67       | 54.6 | 11.9 | 0.99 |
|        |         | 1.5 mg/kg | D3H68       | 41.7 | 12.3 | 1.02 |
|        |         | 1.5 mg/kg | D3H71       | 32.6 | 12.4 | 1.03 |
|        |         | 1.5 mg/kg | D7          | 25   | 12.3 | 1.02 |
|        |         | 1.5 mg/kg | D14         | 25.2 | 11.2 | 0.93 |
|        |         | 1.5 mg/kg | SCREENING   | 29.2 | 12.3 | 1.02 |
|        |         | 1.5 mg/kg | D1H1        | 41.3 | 12.8 | 1.07 |
|        |         | 1.5 mg/kg | D1H2        | 36.6 | 13.8 | 1.15 |
|        |         | 1.5 mg/kg | D1H5        | 32.1 | 13.9 | 1.16 |
|        |         | 1.5 mg/kg | D1H11       | 30.8 | 13.6 | 1.13 |
|        |         | 1.5 mg/kg | D1H17       | 31.6 | 12.9 | 1.08 |
|        |         | 1.5 mg/kg | D1H23       | 28.6 | 12.3 | 1.02 |
|        |         | 1.5 mg/kg | D2H26       | 33   | 12   | 1    |
|        |         | 1.5 mg/kg | D2H29       | 28.7 | 12.2 | 1.02 |
|        |         | 1.5 mg/kg | D2predose6  | 28.8 | 11.9 | 0.99 |
|        |         | 1.5 mg/kg | D2H31       | 41   | 12.5 | 1.04 |
|        |         | 1.5 mg/kg | D2H32       | 32.6 | 12.2 | 1.02 |
|        |         | 1.5 mg/kg | D2H35       | 28.4 | 11.9 | 0.99 |
|        |         | 1.5 mg/kg | D2H41       | 26.8 | 12   | 1    |
|        |         | 1.5 mg/kg | D2H47       | 27.3 | 12.3 | 1.02 |
|        |         | 1.5 mg/kg | D3H53       | 27.7 | 11.9 | 0.99 |
|        |         | 1.5 mg/kg | D3H59       | 25.3 | 12   | 1    |
|        |         | 1.5 mg/kg | D3H65       | 27   | 12.4 | 1.03 |
|        |         | 1.5 mg/kg | D3predose12 | 27.3 | 12.7 | 1.06 |
|        |         | 1.5 mg/kg | D3H67       | 37.7 | 11.8 | 0.98 |
|        |         | 1.5 mg/kg | D3H68       | 30.7 | 12   | 1    |
|        |         | 1.5 mg/kg | D3H71       | 27.8 | 12.2 | 1.02 |
|        |         | 1.5 mg/kg | D7          | 25.2 | 12.3 | 1.02 |
|        |         | 1.5 mg/kg | D14         | 26.9 | 12.6 | 1.05 |

## TSM02 Individual subject listings part 1

## CSR Appendix 16.2

| SUBJID | INITIAL | ARM     | TIMEPOINT   | APTT  | PT   | INR  |
|--------|---------|---------|-------------|-------|------|------|
|        |         | 3 mg/kg | SCREENING   | 30    | 13.3 | 1.11 |
|        |         | 3 mg/kg | D1H1        | 54.1  | 12.7 | 1.06 |
|        |         | 3 mg/kg | D1H2        | 43.7  | 13.5 | 1.13 |
|        |         | 3 mg/kg | D1H5        | 34    | 14.1 | 1.18 |
|        |         | 3 mg/kg | D1H11       | 34.9  | 14.7 | 1.22 |
|        |         | 3 mg/kg | D1H17       | 35.7  | 14.8 | 1.22 |
|        |         | 3 mg/kg | D1H23       | 35.5  | 13.9 | 1.16 |
|        |         | 3 mg/kg | D2H26       | 43.7  | 13.7 | 1.14 |
|        |         | 3 mg/kg | D2H29       | 41.7  | 14   | 1.17 |
|        |         | 3 mg/kg | D2predose6  | error | 17.1 | 1.42 |
|        |         | 3 mg/kg | D2H31       | error | 23.9 | 1.96 |
|        |         | 3 mg/kg | D2H32       | 81.8  | 14.5 | 1.21 |
|        |         | 3 mg/kg | D2H35       | 111.4 | 15   | 1.24 |
|        |         | 3 mg/kg | D2H41       | 40.4  | 13.1 | 1.09 |
|        |         | 3 mg/kg | D2H47       | 32.3  | 12.3 | 1.02 |
|        |         | 3 mg/kg | D3H53       | 32.5  | 13.2 | 1.1  |
|        |         | 3 mg/kg | D3H59       | 33.8  | 12.7 | 1.06 |
|        |         | 3 mg/kg | D3H65       | 32.8  | 12   | 1    |
|        |         | 3 mg/kg | D3predose12 | 31.1  | 12.4 | 1.03 |
|        |         | 3 mg/kg | D3H67       | 57.9  | 11.9 | 0.99 |
|        |         | 3 mg/kg | D3H68       | 45.6  | 12.4 | 1.03 |
|        |         | 3 mg/kg | D3H71       | 33.1  | 12.1 | 1.01 |
|        |         | 3 mg/kg | D7          | 23.1  | 11.2 | 0.93 |
|        |         | 3 mg/kg | D14         | 26.1  | 11.4 | 0.95 |
|        |         | 3 mg/kg | SCREENING   | 26.2  | 14.8 | 1.22 |
|        |         | 3 mg/kg | D1H1        | 53.1  | 16.9 | 1.4  |
|        |         | 3 mg/kg | D1H2        | 41.6  | 16.4 | 1.36 |
|        |         | 3 mg/kg | D1H5        | 42.5  | 17.5 | 1.45 |
|        |         | 3 mg/kg | D1H11       | 34.5  | 18.8 | 1.56 |
|        |         | 3 mg/kg | D1H17       | 34.7  | 16.4 | 1.36 |
|        |         | 3 mg/kg | D1H23       | 38    | 16.8 | 1.39 |
|        |         | 3 mg/kg | D2H26       | 51.5  | 15.2 | 1.26 |
|        |         | 3 mg/kg | D2H29       | 38.7  | 15.9 | 1.32 |
|        |         | 3 mg/kg | D2predose6  | 35.7  | 16.1 | 1.33 |
|        |         | 3 mg/kg | D2H31       | 61.3  | 15.6 | 1.29 |
|        |         | 3 mg/kg | D2H32       | 45.8  | 15.9 | 1.32 |
|        |         | 3 mg/kg | D2H35       | 44.2  | 15.4 | 1.27 |

## TSM02 Individual subject listings part 1

## CSR Appendix 16.2

| SUBJID | INITIAL | ARM     | TIMEPOINT   | APTT | PT   | INR  |
|--------|---------|---------|-------------|------|------|------|
|        |         | 3 mg/kg | D2H41       | 33.3 | 14.8 | 1.22 |
|        |         | 3 mg/kg | D2H47       | 37.5 | 14.9 | 1.23 |
|        |         | 3 mg/kg | D3H53       | 37   | 15.7 | 1.3  |
|        |         | 3 mg/kg | D3H59       | 36.5 | 15.7 | 1.3  |
|        |         | 3 mg/kg | D3H65       | 39.1 | 14.8 | 1.22 |
|        |         | 3 mg/kg | D3predose12 | 37.6 | 14.5 | 1.21 |
|        |         | 3 mg/kg | D3H67       | 68.9 | 14.5 | 1.21 |
|        |         | 3 mg/kg | D3H68       | 53.2 | 15   | 1.24 |
|        |         | 3 mg/kg | D3H71       | 38.9 | 14.9 | 1.23 |
|        |         | 3 mg/kg | D7          | 28.3 | 14.4 | 1.2  |
|        |         | 3 mg/kg | D14         | 23.4 | 11.2 | 1.1  |
|        |         | 3 mg/kg | SCREENING   | 30.7 | 11.5 | 0.96 |
|        |         | 3 mg/kg | D1H1        | 48   | 11.9 | 0.99 |
|        |         | 3 mg/kg | D1H2        | 36.9 | 11.7 | 0.98 |
|        |         | 3 mg/kg | D1H5        | 33.9 | 12.6 | 1.05 |
|        |         | 3 mg/kg | D1H11       | 33.3 | 12.7 | 1.06 |
|        |         | 3 mg/kg | D1H17       | 37.5 | 13.2 | 1.1  |
|        |         | 3 mg/kg | D1H23       | 39   | 13.9 | 1.16 |
|        |         | 3 mg/kg | D2H26       | 50.4 | 14.6 | 1.22 |
|        |         | 3 mg/kg | D2H29       | 42   | 14.5 | 1.21 |
|        |         | 3 mg/kg | D2predose6  | 40.9 | 14.3 | 1.19 |
|        |         | 3 mg/kg | D2H31       | 79.4 | 15.4 | 1.27 |
|        |         | 3 mg/kg | D2H32       | 47.5 | 13.9 | 1.16 |
|        |         | 3 mg/kg | D2H35       | 46   | 14   | 1.17 |
|        |         | 3 mg/kg | D2H41       | 48.8 | 14.1 | 1.18 |
|        |         | 3 mg/kg | D2H47       | 45.1 | 13.3 | 1.11 |
|        |         | 3 mg/kg | D3H53       | 46.3 | 13   | 1.08 |
|        |         | 3 mg/kg | D3H59       | 41.4 | 12.8 | 1.07 |
|        |         | 3 mg/kg | D3H65       | 40   | 13.1 | 1.09 |
|        |         | 3 mg/kg | D3predose12 | 36.1 | 12.3 | 1.02 |
|        |         | 3 mg/kg | D3H67       | 55.5 | 12.7 | 1.06 |
|        |         | 3 mg/kg | D3H68       | 49.6 | 13   | 1.08 |
|        |         | 3 mg/kg | D3H71       | 38   | 12.5 | 1.04 |
|        |         | 3 mg/kg | D7          | 29.3 | 11.9 | 0.99 |
|        |         | 3 mg/kg | D14         | 28.7 | 11.9 | 1.16 |
|        |         | 6 mg/kg | SCREENING   | 26   | 12.2 | 1.02 |
|        |         | 6 mg/kg | D1H1        | 55.3 | 13.1 | 1.09 |

## TSM02 Individual subject listings part 1

## CSR Appendix 16.2

| SUBJID | INITIAL | ARM     | TIMEPOINT   | APTT  | PT   | INR  |
|--------|---------|---------|-------------|-------|------|------|
|        |         | 6 mg/kg | D1H2        | 35.7  | 13.1 | 1.08 |
|        |         | 6 mg/kg | D1H5        | 28    | 12.8 | 1.07 |
|        |         | 6 mg/kg | D1H11       | 30.2  | 13.1 | 1.09 |
|        |         | 6 mg/kg | D1H17       | 32.1  | 14   | 1.17 |
|        |         | 6 mg/kg | D1H23       | 34    | 14.1 | 1.18 |
|        |         | 6 mg/kg | D2H26       | 53.6  | 14.3 | 1.19 |
|        |         | 6 mg/kg | D2H29       | 37.1  | 14.4 | 1.02 |
|        |         | 6 mg/kg | D2predose6  | 36.6  | 14.5 | 1.21 |
|        |         | 6 mg/kg | D2H31       | 80.7  | 15.5 | 1.28 |
|        |         | 6 mg/kg | D2H32       | 56.6  | 14.1 | 1.18 |
|        |         | 6 mg/kg | D2H35       | 39    | 14.8 | 1.22 |
|        |         | 6 mg/kg | D2H41       | 36.3  | 13.7 | 1.14 |
|        |         | 6 mg/kg | D2H47       | 37.6  | 13.2 | 1.1  |
|        |         | 6 mg/kg | D3H53       | 34.5  | 13.3 | 1.11 |
|        |         | 6 mg/kg | D3H59       | 35.8  | 13   | 1.08 |
|        |         | 6 mg/kg | D3H65       | 34.4  | 12.8 | 1.07 |
|        |         | 6 mg/kg | D3predose12 | 31.4  | 12   | 1    |
|        |         | 6 mg/kg | D3H67       | 68.6  | 12.7 | 1.06 |
|        |         | 6 mg/kg | D3H68       | 53.9  | 13.4 | 1.12 |
|        |         | 6 mg/kg | D3H71       | 36.1  | 13.2 | 1.1  |
|        |         | 6 mg/kg | D4          | 27    | 12.9 | 1.08 |
|        |         | 6 mg/kg | D7          | 25.1  | 12.6 | 1.05 |
|        |         | 6 mg/kg | D14         | 24    | 10.8 | 1.06 |
|        |         | 6 mg/kg | SCREENING   | 30.6  | 13.4 | 1.12 |
|        |         | 6 mg/kg | D1H1        | 117.4 | 16.4 | 1.36 |
|        |         | 6 mg/kg | D1H2        | 66.8  | 16   | 1.32 |
|        |         | 6 mg/kg | D1H5        | 41.7  | 14.9 | 1.23 |
|        |         | 6 mg/kg | D1H11       | 43.2  | 14.6 | 1.22 |
|        |         | 6 mg/kg | D1H17       | 42    | 14.1 | 1.18 |
|        |         | 6 mg/kg | D1H23       | 40.8  | 13.5 | 1.13 |
|        |         | 6 mg/kg | D2H26       | 68.6  | 14.1 | 1.18 |
|        |         | 6 mg/kg | D2H29       | 42    | 13.8 | 1.15 |
|        |         | 6 mg/kg | D2predose6  | 39    | 13.4 | 1.12 |
|        |         | 6 mg/kg | D2H31       | 117.1 | 15   | 1.24 |
|        |         | 6 mg/kg | D2H32       | 76.6  | 13.1 | 1.09 |
|        |         | 6 mg/kg | D2H35       | 48.7  | 13.6 | 1.13 |
|        |         | 6 mg/kg | D2H41       | 39.4  | 13.1 | 1.09 |

## TSM02 Individual subject listings part 1

## CSR Appendix 16.2

| SUBJID | INITIAL | ARM     | TIMEPOINT   | APTT  | PT   | INR  |
|--------|---------|---------|-------------|-------|------|------|
|        |         | 6 mg/kg | D2H47       | 42.9  | 13.1 | 1.09 |
|        |         | 6 mg/kg | D3H53       | 43.2  | 14   | 1.17 |
|        |         | 6 mg/kg | D3H59       | 48.9  | 14.6 | 1.22 |
|        |         | 6 mg/kg | D3H65       | 44.2  | 13.1 | 1.09 |
|        |         | 6 mg/kg | D3predose12 | 43.2  | 13.9 | 1.16 |
|        |         | 6 mg/kg | D3H67       | 109.4 | 13.9 | 1.16 |
|        |         | 6 mg/kg | D3H68       | 73.4  | 13.9 | 1.16 |
|        |         | 6 mg/kg | D3H71       | 41.5  | 13.6 | 1.13 |
|        |         | 6 mg/kg | D4          | 27.5  | 12.7 | 1    |
|        |         | 6 mg/kg | D7          | 26.9  | 12.6 | 1.05 |
|        |         | 6 mg/kg | D14         | 28.4  | 11.4 | 0.95 |
|        |         | 6 mg/kg | SCREENING   | 22.6  | 12.1 | 1.01 |
|        |         | 6 mg/kg | D1H1        | 60    | 12.1 | 1.01 |
|        |         | 6 mg/kg | D1H2        | 40.2  | 12.3 | 1.02 |
|        |         | 6 mg/kg | D1H5        | 31    | 13.7 | 1.14 |
|        |         | 6 mg/kg | D1H11       | 32.6  | 13.4 | 1.12 |
|        |         | 6 mg/kg | D1H17       | 32.9  | 13.1 | 1.09 |
|        |         | 6 mg/kg | D1H23       | 34.5  | 12.9 | 1.08 |
|        |         | 6 mg/kg | D2H26       | 47.3  | 13.3 | 1.11 |
|        |         | 6 mg/kg | D2H29       | 34.7  | 13   | 1.08 |
|        |         | 6 mg/kg | D2predose6  | 33.5  | 12.6 | 1.05 |
|        |         | 6 mg/kg | D2H31       | 72.4  | 12.5 | 1.04 |
|        |         | 6 mg/kg | D2H32       | 58.2  | 14.3 | 1.19 |
|        |         | 6 mg/kg | D2H35       | 34.9  | 12.8 | 1.07 |
|        |         | 6 mg/kg | D2H41       | 37.3  | 12.1 | 1.07 |
|        |         | 6 mg/kg | D2H47       | 44.4  | 14.4 | 1.2  |
|        |         | 6 mg/kg | D3H53       | 39.8  | 13.1 | 1.09 |
|        |         | 6 mg/kg | D3H59       | 45.8  | 13.5 | 1.13 |
|        |         | 6 mg/kg | D3H65       | 46.8  | 14.1 | 1.18 |
|        |         | 6 mg/kg | D3predose12 | 30.4  | 11.5 | 0.96 |
|        |         | 6 mg/kg | D3H67       | 81.3  | 12.6 | 1.05 |
|        |         | 6 mg/kg | D3H68       | 59.1  | 13.3 | 1.11 |
|        |         | 6 mg/kg | D3H71       | 40.4  | 12.9 | 1.08 |
|        |         | 6 mg/kg | D4          | 26.6  | 12.1 | 1.01 |
|        |         | 6 mg/kg | D7          | 25.9  | 12.3 | 1.02 |
|        |         | 6 mg/kg | D14         | 24.8  | 11.9 | 0.99 |

## TSM02 Individual subject listings part 1

## CSR Appendix 16.2

## 16.2.9 Concomitant medications

| SUBJID | INITIAL | ARM       | CM SEQ | DRUGNAME                        | ATC TERM                           | ATC CODE | START DATE | DUR (days) | DOSE | UNIT  | ROUTE | FREQ  | INDICATION                  |
|--------|---------|-----------|--------|---------------------------------|------------------------------------|----------|------------|------------|------|-------|-------|-------|-----------------------------|
|        |         | 1.5 mg/kg | 1      | METOCLOPAMIDE                   | metoclopramide                     | A03FA01  |            | 2          | 10   | MG    | IV    | PRN   | NAUSEA, VOMITING            |
|        |         | 1.5 mg/kg | 2      | PARACETAMOL                     | paracetamol                        | N02BE01  |            | ONGOING    | 500  | MG    | PO    | PRN   | FEVER                       |
|        |         | 1.5 mg/kg | 3      | ELIXIR KCL                      | potassium chloride                 | A12BA01  |            | 1          | 30   | ML    | PO    | TDS   | HYPOKALEMIA                 |
|        |         | 1.5 mg/kg | 4      | 10%CA2+ GLUCONATE               | calcium gluconate                  | A12AA03  |            | 1          | 10   | ML    | IV    | OTHER | HYPOCALCEMIA                |
|        |         | 1.5 mg/kg | 5      | KCL 40mEq IN IV FLUID 1000ML    | potassium chloride                 | B05XA01  |            | 1          | 20   | ML    | IV    | OTHER | HYPOKALEMIA                 |
|        |         | 1.5 mg/kg | 6      | KCL 40mEq IN IV FLUID 1000ML    | potassium chloride                 | B05XA01  |            | 1          | 20   | ML    | IV    | OTHER | HYPOKALEMIA                 |
|        |         | 1.5 mg/kg | 7      | METOCLOPAMIDE                   | metoclopramide                     | A03FA01  |            | 1          | 10   | MG    | IV    | PRN   | NAUSEA, VOMITING            |
|        |         | 1.5 mg/kg | 8      | METOCLOPAMIDE                   | metoclopramide                     | A03FA01  |            | ONGOING    | 10   | MG    | PO    | TDS   | NAUSEA, VOMITING            |
|        |         | 1.5 mg/kg | 9      | SODIUM PHOSPHATE                | sodium phosphate                   | A06AD17  |            | 1          | 30   | ML    | PO    | BD    | HYPONATREMIA, HYPOPHOSPHATE |
|        |         | 1.5 mg/kg | 10     | CALCIUM                         | Calcium                            | A12AA    |            | ONGOING    | 1250 | MG    | PO    | TDS   | HYPOCALCEMIA                |
|        |         | 1.5 mg/kg | 11     | K2PO4 40 mEq IN IV FLUID 1000ML | potassium phosphate                | B05XA06  |            | 2          | 20   | ML    | IV    | OTHER | HYPOKALEMIA, HYPOPHOSPHATE  |
|        |         | 1.5 mg/kg | 1      | Paracetamol                     | paracetamol                        | N02BE01  |            | ONGOING    | 500  | MG    | PO    | PRN   | FEVER                       |
|        |         | 1.5 mg/kg | 2      | Metoclopramide                  | metoclopramide                     | A03FA01  |            | 2          | 10   | MG    | IV    | OTHER | NAUSEA, VOMITING            |
|        |         | 1.5 mg/kg | 3      | 10% Calcium gluconate           | calcium gluconate                  | A12AA03  |            | 1          | 10   | ML    | IV    | OTHER | HYPOCALCEMIA                |
|        |         | 1.5 mg/kg | 4      | E. KCl 30 ml                    | potassium chloride                 | A12BA01  |            | 1          | 30   | ML    | PO    | OTHER | HYPOKALEMIA                 |
|        |         | 1.5 mg/kg | 5      | ORS                             | Oral rehydration salt formulations | A07CA    |            | ONGOING    | 1    | OTHER | PO    | PRN   | ELECTROLYTE IMBALANCE       |
|        |         | 1.5 mg/kg | 1      | PARA                            | paracetamol                        | N02BE01  |            | ONGOING    | 1000 | MG    | PO    | PRN   | FEVER                       |
|        |         | 1.5 mg/kg | 2      | PLA                             | metoclopramide                     | A03FA01  |            | ONGOING    | 10   | MG    | IV    | OTHER | NAUSEA, VOMITING            |



## TSM02 Individual subject listings part 1

## CSR Appendix 16.2

| SUBJID | INITIAL | ARM       | CM SEQ | DRUGNAME              | ATC TERM                         | ATC CODE | START DATE | DUR (days) | DOSE | UNIT  | ROUTE | FREQ          | INDICATION          |
|--------|---------|-----------|--------|-----------------------|----------------------------------|----------|------------|------------|------|-------|-------|---------------|---------------------|
|        |         | 1.5 mg/kg | 3      | 10%CA2+ GLUCONATE     | calcium gluconate                | A12AA03  |            | 1          | 10   | ML    | IV    | OTHER         | HYPOCALCEMIA        |
|        |         | 3 mg/kg   | 1      | Paracetamol           | paracetamol                      | N02BE01  |            | ONGOING    | 1000 | MG    | PO    | PRN           | FEVER               |
|        |         | 3 mg/kg   | 2      | 10% Calcium gluconate | calcium gluconate                | A12AA03  |            | 1          | 10   | ML    | IV    | OTHER         | HYPOCALCEMIA        |
|        |         | 3 mg/kg   | 3      | Calcium carbonate     | calcium carbonate                | A12AA04  |            | 3          | 1250 | MG    | PO    | BD            | HYPOCALCEMIA        |
|        |         | 3 mg/kg   | 5      | 0.9% NaCl             | sodium chloride                  | B05XA03  |            | 3          | 40   | OTHER | IV    | Not available | HYDRATION           |
|        |         | 3 mg/kg   | 1      | PARACETAMOL           | paracetamol                      | N02BE01  |            | ONGOING    | 1000 | MG    | PO    | PRN           | FEVER               |
|        |         | 3 mg/kg   | 2      | Calcium Carbonate     | calcium carbonate                | A12AA04  |            | 3          | 1250 | MG    | PO    | TDS           | HYPOCALCEMIA        |
|        |         | 3 mg/kg   | 3      | Folic acid            | folic acid                       | B03BB01  |            | 13         | 5    | MG    | PO    | OD            | ANEMIA              |
|        |         | 3 mg/kg   | 1      | PARACETAMOL           | paracetamol                      | N02BE01  |            | ONGOING    | 500  | MG    | PO    | PRN           | FEVER               |
|        |         | 3 mg/kg   | 2      | DOMPERIDONE           | domperidone                      | A03FA03  |            | 1          | 10   | MG    | PO    | PRN           | VOMITING            |
|        |         | 6 mg/kg   | 1      | PARA                  | paracetamol                      | N02BE01  |            | 2          | 1000 | MG    | PO    | PRN           | FEVER               |
|        |         | 6 mg/kg   | 2      | 0.9% NSS              | sodium chloride                  | B05XA03  |            | 2          | 1000 | ML    | IV    | Not available | HYDRATION           |
|        |         | 6 mg/kg   | 3      | Alum-milk             | ANTACIDS                         | A02A     |            | 1          | 30   | ML    | PO    | OTHER         | GASTRITIS           |
|        |         | 6 mg/kg   | 1      | PARA                  | paracetamol                      | N02BE01  |            | 1          | 1000 | MG    | PO    | PRN           | FEVER               |
|        |         | 6 mg/kg   | 1      | PLA                   | metoclopramide                   | A03FA01  |            | 1          | 1    | VIAL  | IV    | PRN           | VOMITING            |
|        |         | 6 mg/kg   | 2      | PARA                  | paracetamol                      | N02BE01  |            | 3          | 1000 | MG    | PO    | PRN           | FEVER               |
|        |         | 6 mg/kg   | 3      | 0.9% NSS              | sodium chloride                  | B05XA03  |            | 3          | 1000 | ML    | IV    | Not available | DEHYDRATION         |
|        |         | 6 mg/kg   | 4      | FBC                   | iron, multivitamins and minerals | B03AE04  |            | 30         | 1    | TABS  | PO    | TDS           | ANEMIA              |
|        |         | 6 mg/kg   | 5      | folic acid            | folic acid                       | B03BB01  |            | 30         | 5    | MG    | PO    | OD            | ANEMIA              |
|        |         | 6 mg/kg   | 6      | Albendazole           | albendazole                      | P02CA03  |            | 3          | 200  | MG    | PO    | OD            | PARASITIC INFECTION |

TSM02 Individual subject listings part 1

CSR Appendix 16.2
