# Supplementary material for: Inhibition of merozoite invasion and transient de-sequestration by sevuparin in humans with Plasmodium falciparum malaria
Source: PubMed Central journal article supplement (PMC5731734; doi:10.1371/journal.pone.0188754), 2017-12-15
Supplement: pone.0188754.s005.pdf [file pone.0188754.s005.pdf]

**16 APPENDICES**

**16.2 Subject data listings (fully anonymized)**

16.2.1 Discontinued subjects

| SUBJID | INITIAL | ARM                        | ENROL DATE | D2DATE | D3DATE | D4DATE | D7DATE | STATUS | LAST FOLLOW UP DATE | DISCONTINUE REASON        |
|--------|---------|----------------------------|------------|--------|--------|--------|--------|--------|---------------------|---------------------------|
|        |         | Malanil                    |            |        |        |        |        |        |                     | Subject withdraws consent |
|        |         | Malanil                    |            |        |        |        |        |        |                     | Subject withdraws consent |
|        |         | Sevuparin/DF02+<br>Malanil |            |        |        |        |        |        |                     | Subject withdraws consent |

TSM02 Individual subject listings part 2

CSR Appendix 16.2

16.2.2 Protocol deviations

16.2.3 Subjects excluded from the efficacy analysis (if applicable)

*Not applicable.*

16.2.4 Demographic data and other baseline characteristics

16.2.4.1 Demographics

| SUBJID | INITIAL | ARM                     | SEX    | ETHNIC | BIRTHDATE | BLOODTYPE |
|--------|---------|-------------------------|--------|--------|-----------|-----------|
|        |         | Malanil                 | Male   | KAREN  |           | B         |
|        |         | Sevuparin/DF02+ Malanil | Male   | KAREN  |           | A         |
|        |         | Sevuparin/DF02+ Malanil | Male   | KAREN  |           | A         |
|        |         | Malanil                 | Male   | THAI   |           | O         |
|        |         | Malanil                 | Male   | THAI   |           | A         |
|        |         | Sevuparin/DF02+ Malanil | Male   | KAREN  |           | B         |
|        |         | Malanil                 | Male   | KAREN  |           | B         |
|        |         | Sevuparin/DF02+ Malanil | Male   | KAREN  |           | B         |
|        |         | Sevuparin/DF02+ Malanil | Male   | KAREN  |           | A         |
|        |         | Malanil                 | Male   | KAREN  |           | B         |
|        |         | Malanil                 | Male   | KAREN  |           | O         |
|        |         | Sevuparin/DF02+ Malanil | Male   | KAREN  |           | B         |
|        |         | Sevuparin/DF02+ Malanil | Male   | KAREN  |           | A         |
|        |         | Malanil                 | Male   | KAREN  |           | O         |
|        |         | Malanil                 | Male   | KAREN  |           | O         |
|        |         | Malanil                 | Male   | KAREN  |           | O         |
|        |         | Sevuparin/DF02+ Malanil | Female | KAREN  |           | O         |
|        |         | Sevuparin/DF02+ Malanil | Female | KAREN  |           | O         |
|        |         | Sevuparin/DF02+ Malanil | Female | KAREN  |           | A         |
|        |         | Malanil                 | Male   | KAREN  |           | O         |
|        |         | Sevuparin/DF02+ Malanil | Male   | KAREN  |           | B         |
|        |         | Sevuparin/DF02+ Malanil | Male   | KAREN  |           | A         |
|        |         | Sevuparin/DF02+ Malanil | Female | KAREN  |           | B         |
|        |         | Sevuparin/DF02+ Malanil | Male   | KAREN  |           | B         |
|        |         | Malanil                 | Female | KAREN  |           | A         |
|        |         | Malanil                 | Male   | KAREN  |           | O         |
|        |         | Malanil                 | Male   | KAREN  |           | A         |
|        |         | Sevuparin/DF02+ Malanil | Male   | KAREN  |           | A         |
|        |         | Malanil                 | Male   | KAREN  |           | AB        |
|        |         | Malanil                 | Male   | KAREN  |           | A         |
|        |         | Malanil                 | Male   | KAREN  |           | AB        |
|        |         | Malanil                 | Male   | KAREN  |           | O         |
|        |         | Sevuparin/DF02+ Malanil | Male   | KAREN  |           | A         |
|        |         | Malanil                 | Male   | KAREN  |           | A         |

TSM02 Individual subject listings part 2

CSR Appendix 16.2

| <b>SUBJID</b> | <b>INITIAL</b> | <b>ARM</b>              | <b>SEX</b> | <b>ETHNIC</b> | <b>BIRTHDATE</b> | <b>BLOODTYPE</b> |
|---------------|----------------|-------------------------|------------|---------------|------------------|------------------|
|               |                | Malanil                 | Male       | KAREN         |                  | B                |
|               |                | Malanil                 | Male       | KAREN         |                  | A                |
|               |                | Sevuparin/DF02+ Malanil | Male       | KAREN         |                  | A                |
|               |                | Sevuparin/DF02+ Malanil | Male       | KAREN         |                  | B                |
|               |                | Sevuparin/DF02+ Malanil | Male       | KAREN         |                  | O                |
|               |                | Sevuparin/DF02+ Malanil | Male       | KAREN         |                  | B                |
|               |                | Sevuparin/DF02+ Malanil | Male       | KAREN         |                  | O                |
|               |                | Malanil                 | Male       | KAREN         |                  | B                |
|               |                | Malanil                 | Male       | KAREN         |                  | A                |
|               |                | Malanil                 | Male       | KAREN         |                  | A                |

TSM02 Individual subject listings part 2

CSR Appendix 16.2

16.2.4.2 Baseline symptoms

| SUBJID | INITIAL | ARM                     | FEVER | DUR (Days) | DIZZI | DUR (Days) | HEADACHE | DUR (Days) | NAUSEA | DUR (Days) | ANOREXIA | DUR (Days) | VOMIT | DUR (Days) | TIMES in 24HOURS |
|--------|---------|-------------------------|-------|------------|-------|------------|----------|------------|--------|------------|----------|------------|-------|------------|------------------|
|        |         | Malanil                 | Yes   | 1          | Yes   | 1          | No       |            | No     |            | No       |            | No    |            |                  |
|        |         | Sevuparin/DF02+ Malanil | Yes   | 2          | No    |            | Yes      | 2          | No     |            | No       |            | No    |            |                  |
|        |         | Sevuparin/DF02+ Malanil | Yes   | 2          | No    |            | Yes      | 2          | No     |            | No       |            | No    |            |                  |
|        |         | Malanil                 | Yes   | 1          | No    |            | Yes      | 1          | No     |            | No       |            | No    |            |                  |
|        |         | Malanil                 | Yes   | 1          | No    |            | Yes      | 1          | No     |            | No       |            | No    |            |                  |
|        |         | Sevuparin/DF02+ Malanil | Yes   | 3          | No    |            | Yes      | 3          | Yes    | 3          | Yes      | 3          | No    |            |                  |
|        |         | Malanil                 | Yes   | 3          | No    |            | No       |            | No     |            | No       |            | No    |            |                  |
|        |         | Sevuparin/DF02+ Malanil | Yes   | 4          | No    |            | No       |            | No     |            | Yes      | 4          | No    |            |                  |
|        |         | Sevuparin/DF02+ Malanil | Yes   | 1          | No    |            | Yes      | 1          | Yes    | 1          | Yes      | 1          | No    |            |                  |
|        |         | Malanil                 | Yes   | 4          | No    |            | Yes      | 4          | No     |            | Yes      | 4          | No    |            |                  |
|        |         | Malanil                 | Yes   | 5          | No    |            | Yes      | 5          | No     |            | No       |            | No    |            |                  |
|        |         | Sevuparin/DF02+ Malanil | Yes   | 3          | No    |            | Yes      | 3          | No     |            | No       |            | No    |            |                  |
|        |         | Sevuparin/DF02+ Malanil | Yes   | 2          | No    |            | Yes      | 2          | No     |            | No       |            | No    |            |                  |
|        |         | Malanil                 | Yes   | 2          | No    |            | Yes      | 2          | No     |            | No       |            | No    |            |                  |
|        |         | Malanil                 | Yes   | 3          | No    |            | Yes      | 3          | No     |            | No       |            | No    |            |                  |
|        |         | Malanil                 | Yes   | 1          | No    |            | Yes      | 1          | No     |            | No       |            | No    |            |                  |
|        |         | Sevuparin/DF02+ Malanil | Yes   | 4          | No    |            | Yes      | 4          | Yes    | 4          | Yes      | 4          | No    |            |                  |

TSM02 Individual subject listings part 2

CSR Appendix 16.2

| SUBJID | INITIAL | ARM                     | FEVER | DUR (Days) | DIZZI | DUR (Days) | HEADACHE | DUR (Days) | NAUSEA | DUR (Days) | ANOREXIA | DUR (Days) | VOMIT | DUR (Days) | TIMES in 24HOURS |
|--------|---------|-------------------------|-------|------------|-------|------------|----------|------------|--------|------------|----------|------------|-------|------------|------------------|
|        |         | Sevuparin/DF02+ Malanil | Yes   | 2          | Yes   | 2          | Yes      | 2          | Yes    | 2          | No       |            | Yes   | 2          | 1                |
|        |         | Sevuparin/DF02+ Malanil | Yes   | 3          | Yes   | 3          | Yes      | 3          | No     |            | Yes      | 3          | No    |            |                  |
|        |         | Malanil                 | Yes   | 5          | No    |            | Yes      | 5          | No     |            | No       |            | No    |            |                  |
|        |         | Sevuparin/DF02+ Malanil | Yes   | 5          | No    |            | Yes      | 5          | Yes    | 5          | Yes      | 5          | No    |            |                  |
|        |         | Sevuparin/DF02+ Malanil | Yes   | 3          | No    |            | Yes      | 3          | Yes    | 3          | Yes      | 3          | No    |            |                  |
|        |         | Sevuparin/DF02+ Malanil | Yes   | 2          | No    |            | Yes      | 2          | Yes    | 2          | Yes      | 2          | No    |            |                  |
|        |         | Sevuparin/DF02+ Malanil | Yes   | 3          | No    |            | Yes      | 3          | Yes    | 3          | Yes      | 3          | No    |            |                  |
|        |         | Malanil                 | Yes   | 3          | No    |            | Yes      | 3          | Yes    | 3          | Yes      | 3          | No    |            |                  |
|        |         | Malanil                 | Yes   | 2          | No    |            | Yes      | 2          | No     |            | No       |            | No    |            |                  |
|        |         | Malanil                 | Yes   | 2          | No    |            | Yes      | 2          | No     |            | Yes      | 2          | No    |            |                  |
|        |         | Sevuparin/DF02+ Malanil | Yes   | 4          | No    |            | Yes      | 4          | Yes    | 4          | Yes      | 4          | No    |            |                  |
|        |         | Malanil                 | Yes   | 3          | No    |            | Yes      | 3          | No     |            | No       |            | No    |            |                  |
|        |         | Malanil                 | Yes   | 2          | No    |            | Yes      | 2          | No     |            | No       |            | No    |            |                  |
|        |         | Malanil                 | Yes   | 3          | No    |            | Yes      | 3          | No     |            | No       |            | No    |            |                  |
|        |         | Malanil                 | Yes   | 1          | No    |            | Yes      | 1          | No     |            | No       |            | No    |            |                  |
|        |         | Sevuparin/DF02+ Malanil | Yes   | 2          | No    |            | Yes      | 2          | No     |            | No       |            | No    |            |                  |
|        |         | Malanil                 | Yes   | 3          | No    |            | Yes      | 3          | Yes    | 3          | No       |            | No    |            |                  |
|        |         | Malanil                 | Yes   | 2          | No    |            | Yes      | 2          | No     |            | Yes      | 2          | No    |            |                  |

TSM02 Individual subject listings part 2

CSR Appendix 16.2

| SUBJID | INITIAL | ARM                     | FEVER | DUR (Days) | DIZZI | DUR (Days) | HEADACHE | DUR (Days) | NAUSEA | DUR (Days) | ANOREXIA | DUR (Days) | VOMIT | DUR (Days) | TIMES in 24HOURS |
|--------|---------|-------------------------|-------|------------|-------|------------|----------|------------|--------|------------|----------|------------|-------|------------|------------------|
|        |         | Malanil                 | Yes   | 2          | No    |            | Yes      | 2          | Yes    | 1          | No       |            | Yes   | 1          | 1                |
|        |         | Sevuparin/DF02+ Malanil | Yes   | 4          | No    |            | Yes      | 4          | No     |            | No       |            | No    |            |                  |
|        |         | Sevuparin/DF02+ Malanil | Yes   | 2          | No    |            | Yes      | 2          | No     |            | No       |            | No    |            |                  |
|        |         | Sevuparin/DF02+ Malanil | Yes   | 3          | No    |            | Yes      | 3          | No     |            | No       |            | No    |            |                  |
|        |         | Sevuparin/DF02+ Malanil | Yes   | 4          | No    |            | Yes      | 4          | Yes    | 4          | Yes      | 4          | No    |            |                  |
|        |         | Sevuparin/DF02+ Malanil | Yes   | 5          | No    |            | Yes      | 5          | Yes    | 5          | No       |            | No    |            |                  |
|        |         | Malanil                 | Yes   | 4          | No    |            | Yes      | 4          | Yes    | 4          | Yes      | 4          | No    |            |                  |
|        |         | Malanil                 | Yes   | 4          | No    |            | Yes      | 4          | Yes    | 4          | Yes      | 4          | No    |            |                  |
|        |         | Malanil                 | Yes   | 3          | No    |            | Yes      | 3          | Yes    | 3          | Yes      | 3          | No    |            |                  |

TSM02 Individual subject listings part 2

CSR Appendix 16.2

16.2.4.2 Baseline symptoms (-continued)

| SUBJID | INITIAL | ARM                    | DIARRHOEA | ABD PAIN | DUR (Days) | PAIN AREA | ITCHING | SKIN RASH | JOINT PAIN | DUR (Days) | MUSCLE PAIN | DUR (Days) |
|--------|---------|------------------------|-----------|----------|------------|-----------|---------|-----------|------------|------------|-------------|------------|
|        |         | Malanil                | No        | No       |            |           | No      | No        | No         |            | Yes         | 1          |
|        |         | Sevuparin/DF02+Malanil | No        | No       |            |           | No      | No        | No         |            | Yes         | 2          |
|        |         | Sevuparin/DF02+Malanil | No        | No       |            |           | No      | No        | No         |            | Yes         | 2          |
|        |         | Malanil                | No        | No       |            |           | No      | No        | No         |            | No          |            |
|        |         | Malanil                | No        | No       |            |           | No      | No        | No         |            | No          |            |
|        |         | Sevuparin/DF02+Malanil | No        | No       |            |           | No      | No        | No         |            | Yes         | 3          |
|        |         | Malanil                | No        | No       |            |           | No      | No        | Yes        | 5          | Yes         | 5          |
|        |         | Sevuparin/DF02+Malanil | No        | No       |            |           | No      | No        | No         |            | Yes         | 4          |
|        |         | Sevuparin/DF02+Malanil | No        | Yes      | 1          | EPI       | No      | No        | No         |            | No          |            |
|        |         | Malanil                | No        | No       |            |           | No      | No        | No         |            | Yes         | 4          |
|        |         | Malanil                | No        | No       |            |           | No      | No        | No         |            | No          |            |
|        |         | Sevuparin/DF02+Malanil | No        | No       |            |           | No      | No        | Yes        | 3          | Yes         | 3          |
|        |         | Sevuparin/DF02+Malanil | No        | No       |            |           | No      | No        | No         |            | No          |            |
|        |         | Malanil                | No        | No       |            |           | No      | No        | Yes        | 2          | Yes         | 2          |
|        |         | Malanil                | No        | No       |            |           | No      | No        | No         |            | No          |            |
|        |         | Malanil                | No        | No       |            |           | No      | No        | Yes        | 1          | Yes         | 1          |
|        |         | Sevuparin/DF02+Malanil | No        | Yes      | 4          | EPI       | No      | No        | Yes        | 4          | Yes         | 4          |
|        |         | Sevuparin/DF02+Malanil | No        | No       |            |           | No      | No        | Yes        | 2          | Yes         | 2          |
|        |         | Sevuparin/DF02+Malanil | No        | Yes      | 3          | EPI       | No      | No        | No         |            | Yes         | 3          |
|        |         | Malanil                | No        | No       |            |           | No      | No        | No         |            | Yes         | 5          |
|        |         | Sevuparin/DF02+Malanil | No        | No       |            |           | No      | No        | Yes        | 5          | Yes         | 5          |
|        |         | Sevuparin/DF02+Malanil | No        | No       |            |           | No      | No        | Yes        | 3          | Yes         | 3          |

TSM02 Individual subject listings part 2

CSR Appendix 16.2

| SUBJID | INITIAL | ARM                    | DIARRHOEA | ABD PAIN | DUR (Days) | PAIN AREA | ITCHING | SKIN RASH | JOINT PAIN | DUR (Days) | MUSCLE PAIN | DUR (Days) |
|--------|---------|------------------------|-----------|----------|------------|-----------|---------|-----------|------------|------------|-------------|------------|
|        |         | Sevuparin/DF02+Malanil | No        | No       |            |           | No      | No        | Yes        | 2          | Yes         | 2          |
|        |         | Sevuparin/DF02+Malanil | No        | No       |            |           | No      | No        | Yes        | 3          | Yes         | 3          |
|        |         | Malanil                | No        | No       |            |           | No      | No        | Yes        | 3          | Yes         | 3          |
|        |         | Malanil                | No        | No       |            |           | No      | No        | Yes        | 2          | Yes         | 2          |
|        |         | Malanil                | No        | No       |            |           | No      | No        | Yes        | 2          | Yes         | 2          |
|        |         | Sevuparin/DF02+Malanil | No        | No       |            |           | No      | No        | Yes        | 4          | Yes         | 4          |
|        |         | Malanil                | No        | No       |            |           | No      | No        | No         |            | Yes         | 3          |
|        |         | Malanil                | No        | No       |            |           | No      | No        | No         |            | Yes         | 2          |
|        |         | Malanil                | No        | No       |            |           | No      | No        | Yes        | 3          | Yes         | 3          |
|        |         | Malanil                | No        | No       |            |           | No      | No        | Yes        | 1          | Yes         | 1          |
|        |         | Sevuparin/DF02+Malanil | No        | No       |            |           | No      | No        | Yes        | 2          | Yes         | 2          |
|        |         | Malanil                | No        | No       |            |           | No      | No        | Yes        | 3          | Yes         | 3          |
|        |         | Malanil                | No        | No       |            |           | No      | No        | No         |            | Yes         | 2          |
|        |         | Malanil                | No        | No       |            |           | No      | No        | Yes        | 2          | Yes         | 2          |
|        |         | Sevuparin/DF02+Malanil | No        | No       |            |           | No      | No        | No         |            | No          |            |
|        |         | Sevuparin/DF02+Malanil | No        | No       |            |           | No      | No        | No         |            | No          |            |
|        |         | Sevuparin/DF02+Malanil | No        | No       |            |           | No      | No        | Yes        | 3          | Yes         | 3          |
|        |         | Sevuparin/DF02+Malanil | No        | No       |            |           | No      | No        | Yes        | 4          | Yes         | 4          |
|        |         | Sevuparin/DF02+Malanil | No        | No       |            |           | No      | No        | Yes        | 5          | Yes         | 5          |
|        |         | Malanil                | No        | No       |            |           | No      | No        | No         |            | Yes         | 4          |
|        |         | Malanil                | No        | No       |            |           | No      | No        | No         |            | Yes         | 4          |
|        |         | Malanil                | No        | No       |            |           | No      | No        | Yes        | 3          | Yes         | 3          |



TSM02 Individual subject listings part 2

CSR Appendix 16.2

16.2.4.2 Baseline symptoms (-continued)

| SUBJID | INITIAL | ARM                        | PALPITATIONS | DIFFICULTY BREATHING | DIFFICULTY HEARING | CONFUSION | BLURRED VISION | TIREDNESS | DUR (Days) | OTHER       | DUR (Days) |
|--------|---------|----------------------------|--------------|----------------------|--------------------|-----------|----------------|-----------|------------|-------------|------------|
|        |         | Malanil                    | No           | No                   | No                 | No        | No             | No        |            |             |            |
|        |         | Sevuparin/DF02+<br>Malanil | No           | No                   | No                 | No        | No             | No        |            |             |            |
|        |         | Sevuparin/DF02+<br>Malanil | No           | No                   | No                 | No        | No             | Yes       | 2          |             |            |
|        |         | Malanil                    | No           | No                   | No                 | No        | No             | No        |            |             |            |
|        |         | Malanil                    | No           | No                   | No                 | No        | No             | No        |            | SORE THROAT | 1          |
|        |         | Sevuparin/DF02+<br>Malanil | No           | No                   | No                 | No        | No             | No        |            |             |            |
|        |         | Malanil                    | No           | No                   | No                 | No        | No             | No        |            |             |            |
|        |         | Sevuparin/DF02+<br>Malanil | No           | No                   | No                 | No        | No             | No        |            |             |            |
|        |         | Sevuparin/DF02+<br>Malanil | No           | No                   | No                 | No        | No             | No        |            |             |            |
|        |         | Malanil                    | No           | No                   | No                 | No        | No             | No        |            |             |            |
|        |         | Malanil                    | No           | No                   | No                 | No        | No             | No        |            |             |            |
|        |         | Sevuparin/DF02+<br>Malanil | No           | No                   | No                 | No        | No             | No        |            |             |            |
|        |         | Sevuparin/DF02+<br>Malanil | No           | No                   | No                 | No        | No             | No        |            |             |            |
|        |         | Malanil                    | No           | No                   | No                 | No        | No             | No        |            |             |            |
|        |         | Malanil                    | No           | No                   | No                 | No        | No             | No        |            |             |            |
|        |         | Malanil                    | No           | No                   | No                 | No        | No             | No        |            |             |            |
|        |         | Sevuparin/DF02+<br>Malanil | No           | No                   | No                 | No        | No             | No        |            |             |            |

TSM02 Individual subject listings part 2

CSR Appendix 16.2

| <b>SUBJID</b> | <b>INITIAL</b> | <b>ARM</b>                 | <b>PALPITATIONS</b> | <b>DIFFICULTY BREATHING</b> | <b>DIFFICULTY HEARING</b> | <b>CONFUSION</b> | <b>BLURRED VISION</b> | <b>TIREDNESS</b> | <b>DUR (Days)</b> | <b>OTHER</b> | <b>DUR (Days)</b> |
|---------------|----------------|----------------------------|---------------------|-----------------------------|---------------------------|------------------|-----------------------|------------------|-------------------|--------------|-------------------|
|               |                | Sevuparin/DF02+<br>Malanil | No                  | No                          | No                        | No               | No                    | No               |                   |              |                   |
|               |                | Sevuparin/DF02+<br>Malanil | No                  | No                          | No                        | No               | No                    | No               |                   |              |                   |
|               |                | Malanil                    | No                  | No                          | No                        | No               | No                    | No               |                   |              |                   |
|               |                | Sevuparin/DF02+<br>Malanil | No                  | No                          | No                        | No               | No                    | No               |                   |              |                   |
|               |                | Sevuparin/DF02+<br>Malanil | No                  | No                          | No                        | No               | No                    | No               |                   |              |                   |
|               |                | Sevuparin/DF02+<br>Malanil | No                  | No                          | No                        | No               | No                    | No               |                   |              |                   |
|               |                | Malanil                    | No                  | No                          | No                        | No               | No                    | No               |                   |              |                   |
|               |                | Malanil                    | No                  | No                          | No                        | No               | No                    | No               |                   |              |                   |
|               |                | Malanil                    | No                  | No                          | No                        | No               | No                    | No               |                   |              |                   |
|               |                | Sevuparin/DF02+<br>Malanil | No                  | No                          | No                        | No               | No                    | No               |                   |              |                   |
|               |                | Malanil                    | No                  | No                          | No                        | No               | No                    | No               |                   |              |                   |
|               |                | Malanil                    | No                  | No                          | No                        | No               | No                    | No               |                   |              |                   |
|               |                | Malanil                    | No                  | No                          | No                        | No               | No                    | No               |                   |              |                   |
|               |                | Malanil                    | No                  | No                          | No                        | No               | No                    | No               |                   |              |                   |
|               |                | Sevuparin/DF02+<br>Malanil | No                  | No                          | No                        | No               | No                    | No               |                   |              |                   |
|               |                | Malanil                    | No                  | No                          | No                        | No               | No                    | No               |                   |              |                   |
|               |                | Malanil                    | No                  | No                          | No                        | No               | No                    | No               |                   |              |                   |

TSM02 Individual subject listings part 2

CSR Appendix 16.2

| <b>SUBJID</b> | <b>INITIAL</b> | <b>ARM</b>                 | <b>PALPITATIONS</b> | <b>DIFFICULTY BREATHING</b> | <b>DIFFICULTY HEARING</b> | <b>CONFUSION</b> | <b>BLURRED VISION</b> | <b>TIREDNESS</b> | <b>DUR (Days)</b> | <b>OTHER</b> | <b>DUR (Days)</b> |
|---------------|----------------|----------------------------|---------------------|-----------------------------|---------------------------|------------------|-----------------------|------------------|-------------------|--------------|-------------------|
|               |                | Malanil                    | No                  | No                          | No                        | No               | No                    | No               |                   |              |                   |
|               |                | Sevuparin/DF02+<br>Malanil | No                  | No                          | No                        | No               | No                    | No               |                   |              |                   |
|               |                | Sevuparin/DF02+<br>Malanil | No                  | No                          | No                        | No               | No                    | No               |                   |              |                   |
|               |                | Sevuparin/DF02+<br>Malanil | No                  | No                          | No                        | No               | No                    | No               |                   |              |                   |
|               |                | Sevuparin/DF02+<br>Malanil | No                  | No                          | No                        | No               | No                    | Yes              | 4                 |              |                   |
|               |                | Sevuparin/DF02+<br>Malanil | No                  | No                          | No                        | No               | No                    | No               |                   |              |                   |
|               |                | Malanil                    | No                  | No                          | No                        | No               | No                    | No               |                   |              |                   |
|               |                | Malanil                    | No                  | No                          | No                        | No               | No                    | Yes              | 4                 |              |                   |
|               |                | Malanil                    | No                  | No                          | No                        | No               | No                    | No               |                   |              |                   |

TSM02 Individual subject listings part 2

CSR Appendix 16.2

16.2.4.3 Significant past medical history

| SUBJID | INITIAL | ARM                     | MH SEQ | DISEASE           | START DATE | END DATE | MedDRA PT                | MedDRA PT CODE | MedDRA SOC                           | MedDRA SOC CODE |
|--------|---------|-------------------------|--------|-------------------|------------|----------|--------------------------|----------------|--------------------------------------|-----------------|
|        |         | Sevuparin/DF02+ Malanil | 1      | HYPONATREMIA      |            |          | Hyponatraemia            | 10021036       | Metabolism and nutrition disorders   | 10027433        |
|        |         | Sevuparin/DF02+ Malanil | 2      | HYPOKALEMIA       |            |          | Hypokalaemia             | 10021015       | Metabolism and nutrition disorders   | 10027433        |
|        |         | Sevuparin/DF02+ Malanil | 3      | ANEMIA            |            |          | Anaemia                  | 10002034       | Blood and lymphatic system disorders | 10005329        |
|        |         | Malanil                 | 1      | HYPERTHYROIDISM   |            |          | Hyperthyroidism          | 10020850       | Endocrine disorders                  | 10014698        |
|        |         | Malanil                 | 1      | PLATELET DECREASE |            |          | Platelet count decreased | 10035528       | Investigations                       | 10022891        |
|        |         | Sevuparin/DF02+ Malanil | 1      | HYPOKALEMIA       |            |          | Hypokalaemia             | 10021015       | Metabolism and nutrition disorders   | 10027433        |

## TSM02 Individual subject listings part 2

## CSR Appendix 16.2

## 16.2.4.4 Drug history

| SUBJID | INITIAL | ARM                     | DH SEQ | DRUGNAME                  | ATC TERM                            | ATC CODE | REASON             | START DATE | END DATE    |
|--------|---------|-------------------------|--------|---------------------------|-------------------------------------|----------|--------------------|------------|-------------|
|        |         | Malanil                 | 1      | THYROXINE SODIUM (100MCG) | levothyroxine sodium                | H03AA01  | HYPERTHYROIDISM    |            | ONGOING     |
|        |         | Sevuparin/DF02 +Malanil | 1      | PARACETAMOL               | paracetamol                         | N02BE01  | FEVER              |            | 16-Sep-2012 |
|        |         | Sevuparin/DF02 +Malanil | 1      | PARACETAMOL               | paracetamol                         | N02BE01  | FEVER              |            | ONGOING     |
|        |         | Malanil                 | 1      | PARA                      | paracetamol                         | N02BE01  | HEADACHE AND FEVER |            | ONGOING     |
|        |         | Sevuparin/DF02 +Malanil | 1      | PARACETAMOL               | paracetamol                         | N02BE01  | FEVER              |            | ONGOING     |
|        |         | Sevuparin/DF02 +Malanil | 2      | R-DEN ORAL CONTRACEPTIVE  | levonorgestrel and ethinylestradiol | G03AA07  | PREVENT PREGNANCY  |            | ONGOING     |
|        |         | Sevuparin/DF02 +Malanil | 1      | R-DEN ORAL CONTRACEPTIVE  | levonorgestrel and ethinylestradiol | G03AA07  | PREVENT PREGNANCY  |            | ONGOING     |
|        |         | Sevuparin/DF02 +Malanil | 1      | R-DEN                     | levonorgestrel and ethinylestradiol | G03AA07  | PREVENT PREGNANCY  |            | ONGOING     |
|        |         | Sevuparin/DF02 +Malanil | 1      | PARACETAMOL               | paracetamol                         | N02BE01  | FEVER              |            | ONGOING     |
|        |         | Sevuparin/DF02 +Malanil | 1      | PARACETAMOL               | paracetamol                         | N02BE01  | FEVER              |            | ONGOING     |
|        |         | Sevuparin/DF02 +Malanil | 1      | PARACETAMOL               | paracetamol                         | N02BE01  | FEVER              |            | ONGOING     |
|        |         | Malanil                 | 1      | PARACETAMOL               | paracetamol                         | N02BE01  | FEVER              |            | ONGOING     |
|        |         | Malanil                 | 2      | DEPO PROGESTA             | medroxyprogesterone                 | G03AC06  | PREVENT PREGNANCY  |            | ONGOING     |

## TSM02 Individual subject listings part 2

## CSR Appendix 16.2

| SUBJID | INITIAL | ARM                        | DH SEQ | DRUGNAME    | ATC TERM    | ATC CODE | REASON | START DATE | END DATE |
|--------|---------|----------------------------|--------|-------------|-------------|----------|--------|------------|----------|
|        |         | Malanil                    | 1      | PARACETAMOL | paracetamol | N02BE01  | FEVER  |            | ONGOING  |
|        |         | Malanil                    | 1      | PARACETAMOL | paracetamol | N02BE01  | FEVER  |            | ONGOING  |
|        |         | Sevuparin/DF02<br>+Malanil | 1      | PARACETAMOL | paracetamol | N02BE01  | FEVER  |            | ONGOING  |
|        |         | Malanil                    | 1      | PARACETAMOL | paracetamol | N02BE01  | FEVER  |            |          |
|        |         | Malanil                    | 1      | PARACETAMOL | paracetamol | N02BE01  | FEVER  |            | ONGOING  |
|        |         | Malanil                    | 1      | PARACETAMOL | paracetamol | N02BE01  | FEVER  |            | ONGOING  |
|        |         | Sevuparin/DF02<br>+Malanil | 1      | PARACETAMOL | paracetamol | N02BE01  | FEVER  |            | ONGOING  |
|        |         | Malanil                    | 1      | PARACETAMOL | paracetamol | N02BE01  | FEVER  |            |          |
|        |         | Malanil                    | 1      | PARACETAMOL | paracetamol | N02BE01  | FEVER  |            |          |
|        |         | Sevuparin/DF02<br>+Malanil | 1      | PARACETAMOL | paracetamol | N02BE01  | FEVER  |            | ONGOING  |
|        |         | Sevuparin/DF02<br>+Malanil | 1      | PARACETAMOL | paracetamol | N02BE01  | FEVER  |            | ONGOING  |
|        |         | Malanil                    | 1      | PARACETAMOL | paracetamol | N02BE01  | FEVER  |            | ONGOING  |
|        |         | Malanil                    | 1      | PARACETAMOL | paracetamol | N02BE01  | FEVER  |            | ONGOING  |
|        |         | Malanil                    | 1      | PARACETAMOL | paracetamol | N02BE01  | FEVER  |            | ONGOING  |

## 16.2.5 Compliance and drug concentration data

## 16.2.5.1 Listing of drug administration data (Malanil administration)

| SUBJID | INITIAL | ARM                    | DOSE | DATE | TIME  | TABLETS | VOMIT |
|--------|---------|------------------------|------|------|-------|---------|-------|
|        |         | Malanil                | 1    |      | 13:30 | 4       | No    |
|        |         | Malanil                | 2    |      | 13:30 | 4       | No    |
|        |         | Malanil                | 3    |      | 13:30 | 4       | No    |
|        |         | Sevuparin/DF02+Malanil | 1    |      | 13:45 | 4       | No    |
|        |         | Sevuparin/DF02+Malanil | 2    |      | 13:45 | 4       | No    |
|        |         | Sevuparin/DF02+Malanil | 3    |      | 13:45 | 4       | No    |
|        |         | Sevuparin/DF02+Malanil | 1    |      | 17:35 | 4       | No    |
|        |         | Sevuparin/DF02+Malanil | 2    |      | 17:35 | 4       | No    |
|        |         | Sevuparin/DF02+Malanil | 3    |      | 17:35 | 4       | No    |
|        |         | Malanil                | 1    |      | 12:15 | 4       | No    |
|        |         | Malanil                | 2    |      | 12:15 | 4       | No    |
|        |         | Malanil                | 3    |      | 12:15 | 4       | No    |
|        |         | Malanil                | 1    |      | 14:10 | 4       | No    |
|        |         | Malanil                | 2    |      | 14:10 | 4       | No    |
|        |         | Malanil                | 3    |      | 14:10 | 4       | No    |
|        |         | Sevuparin/DF02+Malanil | 1    |      | 14:10 | 4       | No    |
|        |         | Sevuparin/DF02+Malanil | 2    |      | 14:10 | 4       | No    |
|        |         | Sevuparin/DF02+Malanil | 3    |      | 14:10 | 4       | No    |
|        |         | Malanil                | 1    |      | 14:40 | 4       | No    |
|        |         | Malanil                | 2    |      | 14:40 | 4       | No    |
|        |         | Malanil                | 3    |      | 14:40 | 4       | No    |
|        |         | Sevuparin/DF02+Malanil | 1    |      | 14:40 | 4       | No    |
|        |         | Sevuparin/DF02+Malanil | 2    |      | 14:40 | 4       | No    |
|        |         | Sevuparin/DF02+Malanil | 3    |      | 14:40 | 4       | No    |
|        |         | Sevuparin/DF02+Malanil | 1    |      | 12:40 | 4       | No    |
|        |         | Sevuparin/DF02+Malanil | 2    |      | 12:40 | 4       | No    |
|        |         | Sevuparin/DF02+Malanil | 3    |      | 12:40 | 4       | No    |
|        |         | Malanil                | 1    |      | 13:10 | 4       | No    |
|        |         | Malanil                | 2    |      | 13:10 | 4       | No    |
|        |         | Malanil                | 3    |      | 13:10 | 4       | No    |
|        |         | Malanil                | 1    |      | 14:10 | 4       | No    |
|        |         | Malanil                | 2    |      | 14:10 | 4       | No    |
|        |         | Malanil                | 3    |      | 14:10 | 4       | No    |

## TSM02 Individual subject listings part 2

## CSR Appendix 16.2

| SUBJID | INITIAL | ARM                    | DOSE | DATE | TIME  | TABLETS | VOMIT |
|--------|---------|------------------------|------|------|-------|---------|-------|
|        |         | Sevuparin/DF02+Malanil | 1    |      | 11:40 | 4       | No    |
|        |         | Sevuparin/DF02+Malanil | 2    |      | 11:40 | 4       | No    |
|        |         | Sevuparin/DF02+Malanil | 3    |      | 11:40 | 4       | No    |
|        |         | Sevuparin/DF02+Malanil | 1    |      | 16:05 | 4       | No    |
|        |         | Sevuparin/DF02+Malanil | 2    |      | 16:05 | 4       | No    |
|        |         | Sevuparin/DF02+Malanil | 3    |      | 16:05 | 4       | No    |
|        |         | Malanil                | 1    |      | 14:40 | 4       | No    |
|        |         | Malanil                | 2    |      | 14:40 | 4       | No    |
|        |         | Malanil                | 3    |      | 14:40 | 4       | No    |
|        |         | Malanil                | 1    |      | 11:15 | 4       | No    |
|        |         | Malanil                | 2    |      | 11:15 | 4       | No    |
|        |         | Malanil                | 3    |      | 11:15 | 4       | No    |
|        |         | Malanil                | 1    |      | 14:35 | 4       | No    |
|        |         | Malanil                | 2    |      | 14:35 | 4       | No    |
|        |         | Malanil                | 3    |      | 14:35 | 4       | No    |
|        |         | Sevuparin/DF02+Malanil | 1    |      | 14:25 | 4       | No    |
|        |         | Sevuparin/DF02+Malanil | 2    |      | 14:25 | 4       | No    |
|        |         | Sevuparin/DF02+Malanil | 3    |      | 14:25 | 4       | No    |
|        |         | Sevuparin/DF02+Malanil | 1    |      | 15:55 | 4       | No    |
|        |         | Sevuparin/DF02+Malanil | 2    |      | 15:55 | 4       | No    |
|        |         | Sevuparin/DF02+Malanil | 3    |      | 15:55 | 4       | No    |
|        |         | Sevuparin/DF02+Malanil | 1    |      | 14:35 | 4       | No    |
|        |         | Sevuparin/DF02+Malanil | 2    |      | 14:35 | 4       | No    |
|        |         | Sevuparin/DF02+Malanil | 3    |      | 14:35 | 4       | No    |
|        |         | Malanil                | 1    |      | 14:15 | 4       | No    |
|        |         | Malanil                | 2    |      | 14:15 | 4       | No    |
|        |         | Malanil                | 3    |      | 14:15 | 4       | No    |
|        |         | Sevuparin/DF02+Malanil | 1    |      | 16:20 | 4       | No    |
|        |         | Sevuparin/DF02+Malanil | 2    |      | 16:20 | 4       | No    |
|        |         | Sevuparin/DF02+Malanil | 3    |      | 16:20 | 4       | No    |
|        |         | Sevuparin/DF02+Malanil | 1    |      | 14:50 | 4       | No    |
|        |         | Sevuparin/DF02+Malanil | 2    |      | 14:50 | 4       | No    |
|        |         | Sevuparin/DF02+Malanil | 3    |      | 14:50 | 4       | No    |
|        |         | Sevuparin/DF02+Malanil | 1    |      | 14:00 | 4       | No    |
|        |         | Sevuparin/DF02+Malanil | 2    |      | 14:00 | 4       | No    |
|        |         | Sevuparin/DF02+Malanil | 3    |      | 14:00 | 4       | No    |
|        |         | Sevuparin/DF02+Malanil | 1    |      | 15:20 | 4       | No    |



## TSM02 Individual subject listings part 2

## CSR Appendix 16.2

| SUBJID | INITIAL | ARM                    | DOSE | DATE | TIME  | TABLETS | VOMIT |
|--------|---------|------------------------|------|------|-------|---------|-------|
|        |         | Sevuparin/DF02+Malanil | 2    |      | 15:20 | 4       | No    |
|        |         | Sevuparin/DF02+Malanil | 3    |      | 15:20 | 4       | No    |
|        |         | Malanil                | 1    |      | 12:30 | 4       | No    |
|        |         | Malanil                | 2    |      | 12:30 | 4       | No    |
|        |         | Malanil                | 3    |      | 12:30 | 4       | No    |
|        |         | Malanil                | 1    |      | 14:25 | 4       | No    |
|        |         | Malanil                | 2    |      | 14:25 | 4       | No    |
|        |         | Malanil                | 3    |      | 14:25 | 4       | No    |
|        |         | Malanil                | 1    |      | 16:20 | 4       | No    |
|        |         | Malanil                | 2    |      | 16:20 | 4       | No    |
|        |         | Malanil                | 3    |      | 16:20 | 4       | No    |
|        |         | Sevuparin/DF02+Malanil | 1    |      | 13:10 | 4       | No    |
|        |         | Sevuparin/DF02+Malanil | 2    |      | 13:10 | 4       | No    |
|        |         | Sevuparin/DF02+Malanil | 3    |      | 13:10 | 4       | No    |
|        |         | Malanil                | 1    |      | 14:40 | 4       | No    |
|        |         | Malanil                | 2    |      | 14:40 | 4       | No    |
|        |         | Malanil                | 3    |      | 14:40 | 4       | No    |
|        |         | Malanil                | 1    |      | 12:20 | 4       | No    |
|        |         | Malanil                | 2    |      | 12:20 | 4       | No    |
|        |         | Malanil                | 3    |      | 12:20 | 4       | No    |
|        |         | Malanil                | 1    |      | 16:10 | 4       | No    |
|        |         | Malanil                | 2    |      | 16:10 | 4       | No    |
|        |         | Malanil                | 3    |      | 16:10 | 4       | No    |
|        |         | Malanil                | 1    |      | 16:15 | 4       | No    |
|        |         | Malanil                | 2    |      | 16:15 | 4       | No    |
|        |         | Malanil                | 3    |      | 16:15 | 4       | No    |
|        |         | Sevuparin/DF02+Malanil | 1    |      | 16:20 | 4       | No    |
|        |         | Sevuparin/DF02+Malanil | 2    |      | 16:20 | 4       | No    |
|        |         | Sevuparin/DF02+Malanil | 3    |      | 16:20 | 4       | No    |
|        |         | Malanil                | 1    |      | 15:20 | 4       | No    |
|        |         | Malanil                | 2    |      | 15:20 | 4       | No    |
|        |         | Malanil                | 3    |      | 15:20 | 4       | No    |
|        |         | Malanil                | 1    |      | 16:15 | 4       | No    |
|        |         | Malanil                | 2    |      | 16:15 | 4       | No    |
|        |         | Malanil                | 3    |      | 16:15 | 4       | No    |
|        |         | Malanil                | 1    |      | 15:05 | 4       | No    |
|        |         | Malanil                | 2    |      | 15:05 | 4       | No    |

## TSM02 Individual subject listings part 2

## CSR Appendix 16.2

| SUBJID | INITIAL | ARM                    | DOSE | DATE | TIME  | TABLETS | VOMIT |
|--------|---------|------------------------|------|------|-------|---------|-------|
|        |         | Malanil                | 3    |      | 15:05 | 4       | No    |
|        |         | Sevuparin/DF02+Malanil | 1    |      | 16:10 | 4       | No    |
|        |         | Sevuparin/DF02+Malanil | 2    |      | 16:10 | 4       | No    |
|        |         | Sevuparin/DF02+Malanil | 3    |      | 16:10 | 4       | No    |
|        |         | Sevuparin/DF02+Malanil | 1    |      | 15:00 | 4       | No    |
|        |         | Sevuparin/DF02+Malanil | 2    |      | 15:00 | 4       | No    |
|        |         | Sevuparin/DF02+Malanil | 3    |      | 15:00 | 4       | No    |
|        |         | Sevuparin/DF02+Malanil | 1    |      | 18:40 | 4       | No    |
|        |         | Sevuparin/DF02+Malanil | 2    |      | 18:40 | 4       | No    |
|        |         | Sevuparin/DF02+Malanil | 3    |      | 18:40 | 4       | No    |
|        |         | Sevuparin/DF02+Malanil | 1    |      | 13:20 | 4       | No    |
|        |         | Sevuparin/DF02+Malanil | 2    |      | 13:20 | 4       | No    |
|        |         | Sevuparin/DF02+Malanil | 3    |      | 13:20 | 4       | No    |
|        |         | Sevuparin/DF02+Malanil | 1    |      | 17:50 | 4       | No    |
|        |         | Sevuparin/DF02+Malanil | 2    |      | 17:50 | 4       | No    |
|        |         | Sevuparin/DF02+Malanil | 3    |      | 17:50 | 4       | No    |
|        |         | Malanil                | 1    |      | 15:30 | 4       | No    |
|        |         | Malanil                | 2    |      | 15:30 | 4       | No    |
|        |         | Malanil                | 3    |      | 15:30 | 4       | No    |
|        |         | Malanil                | 1    |      | 15:20 | 4       | No    |
|        |         | Malanil                | 2    |      | 15:20 | 4       | No    |
|        |         | Malanil                | 3    |      | 15:20 | 4       | No    |
|        |         | Malanil                | 1    |      | 12:10 | 4       | No    |
|        |         | Malanil                | 2    |      | 12:10 | 4       | No    |
|        |         | Malanil                | 3    |      | 12:10 | 4       | No    |

## TSM02 Individual subject listings part 2

## CSR Appendix 16.2

## 16.2.5.2 Listing of drug administration data (Sevuparin administration)

| SUBJID | INITIAL | ARM                    | DOSE | DATE | TIME  | DOSE (ml) |
|--------|---------|------------------------|------|------|-------|-----------|
|        |         | Sevuparin/DF02+Malanil | 1    |      | 14:20 | 1.1       |
|        |         | Sevuparin/DF02+Malanil | 2    |      | 20:20 | 1.1       |
|        |         | Sevuparin/DF02+Malanil | 3    |      | 02:20 | 1.1       |
|        |         | Sevuparin/DF02+Malanil | 4    |      | 08:20 | 1.1       |
|        |         | Sevuparin/DF02+Malanil | 5    |      | 14:20 | 1.1       |
|        |         | Sevuparin/DF02+Malanil | 6    |      | 20:20 | 1.1       |
|        |         | Sevuparin/DF02+Malanil | 7    |      | 02:20 | 1.1       |
|        |         | Sevuparin/DF02+Malanil | 8    |      | 08:20 | 1.1       |
|        |         | Sevuparin/DF02+Malanil | 9    |      | 14:20 | 1.1       |
|        |         | Sevuparin/DF02+Malanil | 10   |      | 20:20 | 1.1       |
|        |         | Sevuparin/DF02+Malanil | 11   |      | 02:20 | 1.1       |
|        |         | Sevuparin/DF02+Malanil | 12   |      | 08:20 | 1.1       |
|        |         | Sevuparin/DF02+Malanil | 1    |      | 18:10 | 0.96      |
|        |         | Sevuparin/DF02+Malanil | 2    |      | 00:10 | 0.96      |
|        |         | Sevuparin/DF02+Malanil | 3    |      | 06:10 | 0.96      |
|        |         | Sevuparin/DF02+Malanil | 4    |      | 12:10 | 0.96      |
|        |         | Sevuparin/DF02+Malanil | 5    |      | 18:10 | 0.96      |
|        |         | Sevuparin/DF02+Malanil | 6    |      | 00:10 | 0.96      |
|        |         | Sevuparin/DF02+Malanil | 7    |      | 06:10 | 0.96      |
|        |         | Sevuparin/DF02+Malanil | 8    |      | 12:10 | 0.96      |
|        |         | Sevuparin/DF02+Malanil | 9    |      | 18:10 | 0.96      |
|        |         | Sevuparin/DF02+Malanil | 10   |      | 00:10 | 0.96      |
|        |         | Sevuparin/DF02+Malanil | 11   |      | 06:10 | 0.96      |
|        |         | Sevuparin/DF02+Malanil | 12   |      | 12:10 | 0.96      |
|        |         | Sevuparin/DF02+Malanil | 1    |      | 14:40 | 1.28      |
|        |         | Sevuparin/DF02+Malanil | 2    |      | 20:40 | 1.28      |
|        |         | Sevuparin/DF02+Malanil | 3    |      | 02:40 | 1.28      |
|        |         | Sevuparin/DF02+Malanil | 4    |      | 08:40 | 1.28      |
|        |         | Sevuparin/DF02+Malanil | 5    |      | 14:40 | 1.28      |
|        |         | Sevuparin/DF02+Malanil | 6    |      | 20:40 | 1.28      |
|        |         | Sevuparin/DF02+Malanil | 7    |      | 02:40 | 1.28      |
|        |         | Sevuparin/DF02+Malanil | 8    |      | 08:40 | 1.28      |
|        |         | Sevuparin/DF02+Malanil | 9    |      | 14:40 | 1.28      |
|        |         | Sevuparin/DF02+Malanil | 10   |      | 20:40 | 1.28      |
|        |         | Sevuparin/DF02+Malanil | 11   |      | 02:40 | 1.28      |
|        |         | Sevuparin/DF02+Malanil | 12   |      | 08:40 | 1.28      |

## TSM02 Individual subject listings part 2

## CSR Appendix 16.2

| SUBJID | INITIAL | ARM                    | DOSE | DATE | TIME  | DOSE (ml) |
|--------|---------|------------------------|------|------|-------|-----------|
|        |         | Sevuparin/DF02+Malanil | 1    |      | 15:10 | 1.16      |
|        |         | Sevuparin/DF02+Malanil | 2    |      | 21:10 | 1.16      |
|        |         | Sevuparin/DF02+Malanil | 3    |      | 03:10 | 1.16      |
|        |         | Sevuparin/DF02+Malanil | 4    |      | 09:10 | 1.16      |
|        |         | Sevuparin/DF02+Malanil | 5    |      | 15:10 | 1.16      |
|        |         | Sevuparin/DF02+Malanil | 6    |      | 21:10 | 1.16      |
|        |         | Sevuparin/DF02+Malanil | 7    |      | 03:10 | 1.16      |
|        |         | Sevuparin/DF02+Malanil | 8    |      | 09:10 | 1.16      |
|        |         | Sevuparin/DF02+Malanil | 9    |      | 15:10 | 1.16      |
|        |         | Sevuparin/DF02+Malanil | 10   |      | 21:10 | 1.16      |
|        |         | Sevuparin/DF02+Malanil | 11   |      | 03:10 | 1.16      |
|        |         | Sevuparin/DF02+Malanil | 12   |      | 09:10 | 1.16      |
|        |         | Sevuparin/DF02+Malanil | 1    |      | 13:10 | 0.98      |
|        |         | Sevuparin/DF02+Malanil | 2    |      | 19:10 | 0.98      |
|        |         | Sevuparin/DF02+Malanil | 3    |      | 01:10 | 0.98      |
|        |         | Sevuparin/DF02+Malanil | 4    |      | 07:10 | 0.98      |
|        |         | Sevuparin/DF02+Malanil | 5    |      | 13:10 | 0.98      |
|        |         | Sevuparin/DF02+Malanil | 6    |      | 19:10 | 0.98      |
|        |         | Sevuparin/DF02+Malanil | 7    |      | 01:10 | 0.98      |
|        |         | Sevuparin/DF02+Malanil | 8    |      | 07:10 | 0.98      |
|        |         | Sevuparin/DF02+Malanil | 9    |      | 13:10 | 0.98      |
|        |         | Sevuparin/DF02+Malanil | 10   |      | 19:10 | 0.98      |
|        |         | Sevuparin/DF02+Malanil | 11   |      | 01:10 | 0.98      |
|        |         | Sevuparin/DF02+Malanil | 12   |      | 07:10 | 0.98      |
|        |         | Sevuparin/DF02+Malanil | 1    |      | 12:10 | 1.1       |
|        |         | Sevuparin/DF02+Malanil | 2    |      | 18:10 | 1.1       |
|        |         | Sevuparin/DF02+Malanil | 3    |      | 00:10 | 1.1       |
|        |         | Sevuparin/DF02+Malanil | 4    |      | 06:10 | 1.1       |
|        |         | Sevuparin/DF02+Malanil | 5    |      | 12:10 | 1.1       |
|        |         | Sevuparin/DF02+Malanil | 6    |      | 18:10 | 1.1       |
|        |         | Sevuparin/DF02+Malanil | 7    |      | 00:10 | 1.1       |
|        |         | Sevuparin/DF02+Malanil | 8    |      | 06:10 | 1.1       |
|        |         | Sevuparin/DF02+Malanil | 9    |      | 12:10 | 1.1       |
|        |         | Sevuparin/DF02+Malanil | 10   |      | 18:10 | 1.1       |
|        |         | Sevuparin/DF02+Malanil | 11   |      | 00:10 | 1.1       |
|        |         | Sevuparin/DF02+Malanil | 12   |      | 06:10 | 1.1       |
|        |         | Sevuparin/DF02+Malanil | 1    |      | 16:35 | 1.08      |

## TSM02 Individual subject listings part 2

## CSR Appendix 16.2

| SUBJID | INITIAL | ARM                    | DOSE | DATE | TIME  | DOSE (ml) |
|--------|---------|------------------------|------|------|-------|-----------|
|        |         | Sevuparin/DF02+Malanil | 2    |      | 22:35 | 1.08      |
|        |         | Sevuparin/DF02+Malanil | 3    |      | 04:35 | 1.08      |
|        |         | Sevuparin/DF02+Malanil | 4    |      | 10:35 | 1.08      |
|        |         | Sevuparin/DF02+Malanil | 5    |      | 16:35 | 1.08      |
|        |         | Sevuparin/DF02+Malanil | 6    |      | 22:35 | 1.08      |
|        |         | Sevuparin/DF02+Malanil | 7    |      | 04:35 | 1.08      |
|        |         | Sevuparin/DF02+Malanil | 8    |      | 10:35 | 1.08      |
|        |         | Sevuparin/DF02+Malanil | 9    |      | 16:35 | 1.08      |
|        |         | Sevuparin/DF02+Malanil | 10   |      | 22:35 | 1.08      |
|        |         | Sevuparin/DF02+Malanil | 11   |      | 04:35 | 1.08      |
|        |         | Sevuparin/DF02+Malanil | 12   |      | 10:35 | 1.08      |
|        |         | Sevuparin/DF02+Malanil | 1    |      | 14:55 | 1.14      |
|        |         | Sevuparin/DF02+Malanil | 2    |      | 20:55 | 1.14      |
|        |         | Sevuparin/DF02+Malanil | 3    |      | 02:55 | 1.14      |
|        |         | Sevuparin/DF02+Malanil | 4    |      | 08:55 | 1.14      |
|        |         | Sevuparin/DF02+Malanil | 5    |      | 14:55 | 1.14      |
|        |         | Sevuparin/DF02+Malanil | 6    |      | 20:55 | 1.14      |
|        |         | Sevuparin/DF02+Malanil | 7    |      | 02:55 | 1.14      |
|        |         | Sevuparin/DF02+Malanil | 8    |      | 08:55 | 1.14      |
|        |         | Sevuparin/DF02+Malanil | 9    |      | 14:55 | 1.14      |
|        |         | Sevuparin/DF02+Malanil | 10   |      | 20:55 | 1.14      |
|        |         | Sevuparin/DF02+Malanil | 11   |      | 02:55 | 1.14      |
|        |         | Sevuparin/DF02+Malanil | 12   |      | 08:55 | 1.14      |
|        |         | Sevuparin/DF02+Malanil | 1    |      | 16:25 | 1.34      |
|        |         | Sevuparin/DF02+Malanil | 2    |      | 22:25 | 1.34      |
|        |         | Sevuparin/DF02+Malanil | 3    |      | 04:25 | 1.34      |
|        |         | Sevuparin/DF02+Malanil | 4    |      | 10:25 | 1.34      |
|        |         | Sevuparin/DF02+Malanil | 5    |      | 16:25 | 1.34      |
|        |         | Sevuparin/DF02+Malanil | 6    |      | 22:25 | 1.34      |
|        |         | Sevuparin/DF02+Malanil | 7    |      | 04:25 | 1.34      |
|        |         | Sevuparin/DF02+Malanil | 8    |      | 10:25 | 1.34      |
|        |         | Sevuparin/DF02+Malanil | 9    |      | 16:25 | 1.34      |
|        |         | Sevuparin/DF02+Malanil | 10   |      | 22:25 | 1.34      |
|        |         | Sevuparin/DF02+Malanil | 11   |      | 04:25 | 1.34      |
|        |         | Sevuparin/DF02+Malanil | 12   |      | 10:25 | 1.34      |
|        |         | Sevuparin/DF02+Malanil | 1    |      | 15:05 | 1         |
|        |         | Sevuparin/DF02+Malanil | 2    |      | 21:05 | 1         |

## TSM02 Individual subject listings part 2

## CSR Appendix 16.2

| SUBJID | INITIAL | ARM                    | DOSE | DATE | TIME  | DOSE (ml) |
|--------|---------|------------------------|------|------|-------|-----------|
|        |         | Sevuparin/DF02+Malanil | 3    |      | 03:05 | 1         |
|        |         | Sevuparin/DF02+Malanil | 4    |      | 09:05 | 1         |
|        |         | Sevuparin/DF02+Malanil | 5    |      | 15:05 | 1         |
|        |         | Sevuparin/DF02+Malanil | 6    |      | 21:05 | 1         |
|        |         | Sevuparin/DF02+Malanil | 7    |      | 03:05 | 1         |
|        |         | Sevuparin/DF02+Malanil | 8    |      | 09:05 | 1         |
|        |         | Sevuparin/DF02+Malanil | 9    |      | 15:05 | 1         |
|        |         | Sevuparin/DF02+Malanil | 10   |      | 21:05 | 1         |
|        |         | Sevuparin/DF02+Malanil | 11   |      | 03:05 | 1         |
|        |         | Sevuparin/DF02+Malanil | 12   |      | 09:05 | 1         |
|        |         | Sevuparin/DF02+Malanil | 1    |      | 16:45 | 1.12      |
|        |         | Sevuparin/DF02+Malanil | 2    |      | 22:45 | 1.12      |
|        |         | Sevuparin/DF02+Malanil | 3    |      | 04:45 | 1.12      |
|        |         | Sevuparin/DF02+Malanil | 4    |      | 10:45 | 1.12      |
|        |         | Sevuparin/DF02+Malanil | 5    |      | 16:45 | 1.12      |
|        |         | Sevuparin/DF02+Malanil | 6    |      | 22:45 | 1.12      |
|        |         | Sevuparin/DF02+Malanil | 7    |      | 04:45 | 1.12      |
|        |         | Sevuparin/DF02+Malanil | 8    |      | 10:45 | 1.12      |
|        |         | Sevuparin/DF02+Malanil | 9    |      | 16:45 | 1.12      |
|        |         | Sevuparin/DF02+Malanil | 10   |      | 22:45 | 1.12      |
|        |         | Sevuparin/DF02+Malanil | 11   |      | 04:45 | 1.12      |
|        |         | Sevuparin/DF02+Malanil | 12   |      | 10:45 | 1.12      |
|        |         | Sevuparin/DF02+Malanil | 1    |      | 15:20 | 0.98      |
|        |         | Sevuparin/DF02+Malanil | 2    |      | 21:20 | 0.98      |
|        |         | Sevuparin/DF02+Malanil | 3    |      | 03:20 | 0.98      |
|        |         | Sevuparin/DF02+Malanil | 4    |      | 09:20 | 0.98      |
|        |         | Sevuparin/DF02+Malanil | 5    |      | 15:20 | 0.98      |
|        |         | Sevuparin/DF02+Malanil | 6    |      | 21:20 | 0.98      |
|        |         | Sevuparin/DF02+Malanil | 7    |      | 03:20 | 0.98      |
|        |         | Sevuparin/DF02+Malanil | 8    |      | 09:20 | 0.98      |
|        |         | Sevuparin/DF02+Malanil | 9    |      | 15:20 | 0.98      |
|        |         | Sevuparin/DF02+Malanil | 10   |      | 21:20 | 0.98      |
|        |         | Sevuparin/DF02+Malanil | 11   |      | 03:20 | 0.98      |
|        |         | Sevuparin/DF02+Malanil | 12   |      | 09:20 | 0.98      |
|        |         | Sevuparin/DF02+Malanil | 1    |      | 14:30 | 1.34      |
|        |         | Sevuparin/DF02+Malanil | 2    |      | 20:30 | 1.34      |
|        |         | Sevuparin/DF02+Malanil | 3    |      | 02:30 | 1.34      |

## TSM02 Individual subject listings part 2

## CSR Appendix 16.2

| SUBJID | INITIAL | ARM                    | DOSE | DATE | TIME  | DOSE (ml) |
|--------|---------|------------------------|------|------|-------|-----------|
|        |         | Sevuparin/DF02+Malanil | 4    |      | 08:30 | 1.34      |
|        |         | Sevuparin/DF02+Malanil | 5    |      | 14:30 | 1.34      |
|        |         | Sevuparin/DF02+Malanil | 6    |      | 20:30 | 1.34      |
|        |         | Sevuparin/DF02+Malanil | 7    |      | 02:30 | 1.34      |
|        |         | Sevuparin/DF02+Malanil | 8    |      | 08:30 | 1.34      |
|        |         | Sevuparin/DF02+Malanil | 9    |      | 14:30 | 1.34      |
|        |         | Sevuparin/DF02+Malanil | 10   |      | 20:30 | 1.34      |
|        |         | Sevuparin/DF02+Malanil | 11   |      | 02:30 | 1.34      |
|        |         | Sevuparin/DF02+Malanil | 12   |      | 08:30 | 1.34      |
|        |         | Sevuparin/DF02+Malanil | 1    |      | 15:45 | 0.9       |
|        |         | Sevuparin/DF02+Malanil | 2    |      | 21:45 | 0.9       |
|        |         | Sevuparin/DF02+Malanil | 3    |      | 03:45 | 0.9       |
|        |         | Sevuparin/DF02+Malanil | 4    |      | 09:45 | 0.9       |
|        |         | Sevuparin/DF02+Malanil | 5    |      | 15:45 | 0.9       |
|        |         | Sevuparin/DF02+Malanil | 6    |      | 21:45 | 0.9       |
|        |         | Sevuparin/DF02+Malanil | 7    |      | 03:45 | 0.9       |
|        |         | Sevuparin/DF02+Malanil | 8    |      | 09:45 | 0.9       |
|        |         | Sevuparin/DF02+Malanil | 9    |      | 15:45 | 0.9       |
|        |         | Sevuparin/DF02+Malanil | 10   |      | 21:45 | 0.9       |
|        |         | Sevuparin/DF02+Malanil | 11   |      | 03:45 | 0.9       |
|        |         | Sevuparin/DF02+Malanil | 12   |      | 09:45 | 0.9       |
|        |         | Sevuparin/DF02+Malanil | 1    |      | 13:40 | 1.1       |
|        |         | Sevuparin/DF02+Malanil | 2    |      | 19:40 | 1.1       |
|        |         | Sevuparin/DF02+Malanil | 3    |      | 01:40 | 1.1       |
|        |         | Sevuparin/DF02+Malanil | 4    |      | 07:40 | 1.1       |
|        |         | Sevuparin/DF02+Malanil | 5    |      | 13:40 | 1.1       |
|        |         | Sevuparin/DF02+Malanil | 6    |      | 19:40 | 1.1       |
|        |         | Sevuparin/DF02+Malanil | 7    |      | 01:40 | 1.1       |
|        |         | Sevuparin/DF02+Malanil | 8    |      | 07:40 | 1.1       |
|        |         | Sevuparin/DF02+Malanil | 9    |      | 13:40 | 1.1       |
|        |         | Sevuparin/DF02+Malanil | 10   |      | 19:40 | 1.1       |
|        |         | Sevuparin/DF02+Malanil | 11   |      | 01:40 | 1.1       |
|        |         | Sevuparin/DF02+Malanil | 12   |      | 07:40 | 1.1       |
|        |         | Sevuparin/DF02+Malanil | 1    |      | 16:40 | 0.9       |
|        |         | Sevuparin/DF02+Malanil | 2    |      | 22:40 | 0.9       |
|        |         | Sevuparin/DF02+Malanil | 3    |      | 04:40 | 0.9       |
|        |         | Sevuparin/DF02+Malanil | 4    |      | 10:40 | 0.9       |

TSM02 Individual subject listings part 2

CSR Appendix 16.2

| SUBJID | INITIAL | ARM                    | DOSE | DATE | TIME  | DOSE (ml) |
|--------|---------|------------------------|------|------|-------|-----------|
|        |         | Sevuparin/DF02+Malanil | 5    |      | 16:40 | 0.9       |
|        |         | Sevuparin/DF02+Malanil | 6    |      | 22:40 | 0.9       |
|        |         | Sevuparin/DF02+Malanil | 7    |      | 04:40 | 0.9       |
|        |         | Sevuparin/DF02+Malanil | 8    |      | 10:40 | 0.9       |
|        |         | Sevuparin/DF02+Malanil | 9    |      | 16:40 | 0.9       |
|        |         | Sevuparin/DF02+Malanil | 10   |      | 22:40 | 0.9       |
|        |         | Sevuparin/DF02+Malanil | 11   |      | 04:40 | 0.9       |
|        |         | Sevuparin/DF02+Malanil | 12   |      | 10:40 | 0.9       |
|        |         | Sevuparin/DF02+Malanil | 1    |      | 16:30 | 1.14      |
|        |         | Sevuparin/DF02+Malanil | 2    |      | 22:30 | 1.14      |
|        |         | Sevuparin/DF02+Malanil | 3    |      | 04:30 | 1.14      |
|        |         | Sevuparin/DF02+Malanil | 4    |      | 10:30 | 1.14      |
|        |         | Sevuparin/DF02+Malanil | 5    |      | 16:30 | 1.14      |
|        |         | Sevuparin/DF02+Malanil | 6    |      | 22:30 | 1.14      |
|        |         | Sevuparin/DF02+Malanil | 7    |      | 04:30 | 1.14      |
|        |         | Sevuparin/DF02+Malanil | 8    |      | 10:30 | 1.14      |
|        |         | Sevuparin/DF02+Malanil | 9    |      | 16:30 | 1.14      |
|        |         | Sevuparin/DF02+Malanil | 10   |      | 22:30 | 1.14      |
|        |         | Sevuparin/DF02+Malanil | 11   |      | 04:30 | 1.14      |
|        |         | Sevuparin/DF02+Malanil | 12   |      | 10:30 | 1.14      |
|        |         | Sevuparin/DF02+Malanil | 1    |      | 15:20 | 1.02      |
|        |         | Sevuparin/DF02+Malanil | 2    |      | 21:20 | 1.02      |
|        |         | Sevuparin/DF02+Malanil | 3    |      | 03:20 | 1.02      |
|        |         | Sevuparin/DF02+Malanil | 4    |      | 09:20 | 1.02      |
|        |         | Sevuparin/DF02+Malanil | 5    |      | 15:20 | 1.02      |
|        |         | Sevuparin/DF02+Malanil | 6    |      | 21:20 | 1.02      |
|        |         | Sevuparin/DF02+Malanil | 7    |      | 03:20 | 1.02      |
|        |         | Sevuparin/DF02+Malanil | 8    |      | 09:20 | 1.02      |
|        |         | Sevuparin/DF02+Malanil | 9    |      | 15:20 | 1.02      |
|        |         | Sevuparin/DF02+Malanil | 10   |      | 21:20 | 1.02      |
|        |         | Sevuparin/DF02+Malanil | 11   |      | 03:20 | 1.02      |
|        |         | Sevuparin/DF02+Malanil | 12   |      | 09:20 | 1.02      |
|        |         | Sevuparin/DF02+Malanil | 1    |      | 19:20 | 1.12      |
|        |         | Sevuparin/DF02+Malanil | 2    |      | 01:20 | 1.12      |
|        |         | Sevuparin/DF02+Malanil | 3    |      | 07:20 | 1.12      |
|        |         | Sevuparin/DF02+Malanil | 4    |      | 13:20 | 1.12      |
|        |         | Sevuparin/DF02+Malanil | 5    |      | 19:20 | 1.12      |



## TSM02 Individual subject listings part 2

## CSR Appendix 16.2

| SUBJID | INITIAL | ARM                    | DOSE | DATE | TIME  | DOSE (ml) |
|--------|---------|------------------------|------|------|-------|-----------|
|        |         | Sevuparin/DF02+Malanil | 6    |      | 01:20 | 1.12      |
|        |         | Sevuparin/DF02+Malanil | 7    |      | 07:20 | 1.12      |
|        |         | Sevuparin/DF02+Malanil | 8    |      | 13:20 | 1.12      |
|        |         | Sevuparin/DF02+Malanil | 9    |      | 19:20 | 1.12      |
|        |         | Sevuparin/DF02+Malanil | 10   |      | 01:20 | 1.12      |
|        |         | Sevuparin/DF02+Malanil | 11   |      | 07:20 | 1.12      |
|        |         | Sevuparin/DF02+Malanil | 12   |      | 13:20 | 1.12      |
|        |         | Sevuparin/DF02+Malanil | 1    |      | 13:45 | 0.88      |
|        |         | Sevuparin/DF02+Malanil | 2    |      | 19:45 | 0.88      |
|        |         | Sevuparin/DF02+Malanil | 3    |      | 01:45 | 0.88      |
|        |         | Sevuparin/DF02+Malanil | 4    |      | 07:45 | 0.88      |
|        |         | Sevuparin/DF02+Malanil | 5    |      | 13:45 | 0.88      |
|        |         | Sevuparin/DF02+Malanil | 6    |      | 19:45 | 0.88      |
|        |         | Sevuparin/DF02+Malanil | 7    |      | 01:45 | 0.88      |
|        |         | Sevuparin/DF02+Malanil | 8    |      | 07:45 | 0.88      |
|        |         | Sevuparin/DF02+Malanil | 9    |      | 13:45 | 0.88      |
|        |         | Sevuparin/DF02+Malanil | 10   |      | 19:45 | 0.88      |
|        |         | Sevuparin/DF02+Malanil | 11   |      | 01:45 | 0.88      |
|        |         | Sevuparin/DF02+Malanil | 12   |      | 07:45 | 0.88      |
|        |         | Sevuparin/DF02+Malanil | 1    |      | 18:05 | 0.88      |
|        |         | Sevuparin/DF02+Malanil | 2    |      | 00:05 | 0.88      |
|        |         | Sevuparin/DF02+Malanil | 3    |      | 06:05 | 0.88      |
|        |         | Sevuparin/DF02+Malanil | 4    |      | 12:05 | 0.88      |
|        |         | Sevuparin/DF02+Malanil | 5    |      | 18:05 | 0.88      |
|        |         | Sevuparin/DF02+Malanil | 6    |      | 00:05 | 0.88      |
|        |         | Sevuparin/DF02+Malanil | 7    |      | 06:05 | 0.88      |
|        |         | Sevuparin/DF02+Malanil | 8    |      | 12:05 | 0.88      |
|        |         | Sevuparin/DF02+Malanil | 9    |      | 18:05 | 0.88      |
|        |         | Sevuparin/DF02+Malanil | 10   |      | 00:05 | 0.88      |
|        |         | Sevuparin/DF02+Malanil | 11   |      | 06:05 | 0.88      |
|        |         | Sevuparin/DF02+Malanil | 12   |      | 12:05 | 0.88      |

TSM02 Individual subject listings part 2

CSR Appendix 16.2

16.2.6 Individual efficacy response data

16.2.6.1 Malaria Blood smear

(ND = Not Done)

| SUBJID | INITIAL | ARM                        | TIMEPOINT | SPECIES  | PARASITAEMIA<br>(/µL) | Tiny<br>Rings<br>(%) | Small<br>Rings<br>(%) | Large<br>Rings<br>(%) | Early<br>Troph<br>(%) | Mid<br>Troph<br>(%) | Late<br>Troph<br>(%) | Gamet<br>(%) | Schiz<br>(%) |
|--------|---------|----------------------------|-----------|----------|-----------------------|----------------------|-----------------------|-----------------------|-----------------------|---------------------|----------------------|--------------|--------------|
|        |         | Malanil                    | SCREENING | Pf       | 10034                 | 0                    | 0                     | 11                    | 68                    | 21                  | 0                    | 0            | 0            |
|        |         | Malanil                    | D1H0      | Pf       | 5670                  | 1                    | 6                     | 8                     | 72                    | 13                  | 0                    | 0            | 0            |
|        |         | Malanil                    | D1H1      | Pf       | 3544                  | 2                    | 8                     | 11                    | 71                    | 8                   | 0                    | 0            | 0            |
|        |         | Malanil                    | D1H2      | Pf       | 1306                  | 0                    | 6                     | 6                     | 70                    | 18                  | 0                    | 0            | 0            |
|        |         | Malanil                    | D1H3      | Pf       | 1156                  | 10                   | 28                    | 16                    | 42                    | 4                   | 0                    | 0            | 0            |
|        |         | Malanil                    | D1H4      | Pf       | 709                   | 9                    | 0                     | 18                    | 64                    | 9                   | 0                    | 0            | 0            |
|        |         | Malanil                    | D1H6      | Pf       | 224                   | ND                   | ND                    | ND                    | ND                    | ND                  | ND                   | ND           | ND           |
|        |         | Malanil                    | D1H8      | Pf       | 149                   | ND                   | ND                    | ND                    | ND                    | ND                  | ND                   | ND           | ND           |
|        |         | Malanil                    | D1H10     | Pf       | 75                    | ND                   | ND                    | ND                    | ND                    | ND                  | ND                   | ND           | ND           |
|        |         | Malanil                    | D1H11     | Pf       | 75                    | ND                   | ND                    | ND                    | ND                    | ND                  | ND                   | ND           | ND           |
|        |         | Malanil                    | D1H17     | Pf       | 37                    | ND                   | ND                    | ND                    | ND                    | ND                  | ND                   | ND           | ND           |
|        |         | Malanil                    | D1H23     | NEGATIVE | 0                     | ND                   | ND                    | ND                    | ND                    | ND                  | ND                   | ND           | ND           |
|        |         | Malanil                    | D1H29     | NEGATIVE | 0                     | ND                   | ND                    | ND                    | ND                    | ND                  | ND                   | ND           | ND           |
|        |         | Malanil                    | D2H35     | NEGATIVE | 0                     | ND                   | ND                    | ND                    | ND                    | ND                  | ND                   | ND           | ND           |
|        |         | Malanil                    | D2H41     | NEGATIVE | 0                     | ND                   | ND                    | ND                    | ND                    | ND                  | ND                   | ND           | ND           |
|        |         | Malanil                    | D3H47     | NEGATIVE | 0                     | ND                   | ND                    | ND                    | ND                    | ND                  | ND                   | ND           | ND           |
|        |         | Sevuparin/DF02+<br>Malanil | SCREENING | Pf       | 10468                 | 0                    | 0                     | 10                    | 81                    | 9                   | 0                    | 0            | 0            |
|        |         | Sevuparin/DF02+            | D1H0      | Pf       | 5975                  | 0                    | 0                     | 3                     | 76                    | 19                  | 2                    | 0            | 0            |

## TSM02 Individual subject listings part 2

## CSR Appendix 16.2

| SUBJID | INITIAL | ARM                        | TIMEPOINT | SPECIES  | PARASITAEMIA<br>( $\mu$ L) | Tiny<br>Rings<br>(%) | Small<br>Rings<br>(%) | Large<br>Rings<br>(%) | Early<br>Troph<br>(%) | Mid<br>Troph<br>(%) | Late<br>Troph<br>(%) | Gamet<br>(%) | Schiz<br>(%) |
|--------|---------|----------------------------|-----------|----------|----------------------------|----------------------|-----------------------|-----------------------|-----------------------|---------------------|----------------------|--------------|--------------|
|        |         | Malanil                    |           |          |                            |                      |                       |                       |                       |                     |                      |              |              |
|        |         | Sevuparin/DF02+<br>Malanil | D1H1      | Pf       | 2438                       | 0                    | 0                     | 0                     | 57                    | 38                  | 5                    | 0            | 0            |
|        |         | Sevuparin/DF02+<br>Malanil | D1H2      | Pf       | 956                        | 0                    | 5                     | 13                    | 63                    | 17                  | 2                    | 0            | 0            |
|        |         | Sevuparin/DF02+<br>Malanil | D1H3      | Pf       | 454                        | 0                    | 0                     | 6                     | 64                    | 23                  | 7                    | 0            | 0            |
|        |         | Sevuparin/DF02+<br>Malanil | D1H4      | Pf       | 311                        | 0                    | 5                     | 21                    | 53                    | 16                  | 5                    | 0            | 0            |
|        |         | Sevuparin/DF02+<br>Malanil | D1H6      | Pf       | 239                        | ND                   | ND                    | ND                    | ND                    | ND                  | ND                   | ND           | ND           |
|        |         | Sevuparin/DF02+<br>Malanil | D1H8      | Pf       | 120                        | ND                   | ND                    | ND                    | ND                    | ND                  | ND                   | ND           | ND           |
|        |         | Sevuparin/DF02+<br>Malanil | D1H10     | Pf       | 72                         | ND                   | ND                    | ND                    | ND                    | ND                  | ND                   | ND           | ND           |
|        |         | Sevuparin/DF02+<br>Malanil | D1H11     | Pf       | 48                         | ND                   | ND                    | ND                    | ND                    | ND                  | ND                   | ND           | ND           |
|        |         | Sevuparin/DF02+<br>Malanil | D1H17     | Pf       | 48                         | ND                   | ND                    | ND                    | ND                    | ND                  | ND                   | ND           | ND           |
|        |         | Sevuparin/DF02+<br>Malanil | D1H23     | Pf       | 24                         | ND                   | ND                    | ND                    | ND                    | ND                  | ND                   | ND           | ND           |
|        |         | Sevuparin/DF02+<br>Malanil | D1H29     | NEGATIVE | 0                          | ND                   | ND                    | ND                    | ND                    | ND                  | ND                   | ND           | ND           |
|        |         | Sevuparin/DF02+<br>Malanil | D2H35     | NEGATIVE | 0                          | ND                   | ND                    | ND                    | ND                    | ND                  | ND                   | ND           | ND           |
|        |         | Sevuparin/DF02+<br>Malanil | D2H41     | NEGATIVE | 0                          | ND                   | ND                    | ND                    | ND                    | ND                  | ND                   | ND           | ND           |

## TSM02 Individual subject listings part 2

## CSR Appendix 16.2

| SUBJID | INITIAL | ARM                        | TIMEPOINT | SPECIES  | PARASITAEMIA<br>( $\mu$ L) | Tiny<br>Rings<br>(%) | Small<br>Rings<br>(%) | Large<br>Rings<br>(%) | Early<br>Troph<br>(%) | Mid<br>Troph<br>(%) | Late<br>Troph<br>(%) | Gamet<br>(%) | Schiz<br>(%) |
|--------|---------|----------------------------|-----------|----------|----------------------------|----------------------|-----------------------|-----------------------|-----------------------|---------------------|----------------------|--------------|--------------|
|        |         | Sevuparin/DF02+<br>Malanil | D3H47     | NEGATIVE | 0                          | ND                   | ND                    | ND                    | ND                    | ND                  | ND                   | ND           | ND           |
|        |         | Sevuparin/DF02+<br>Malanil | D7        | NEGATIVE | 0                          | ND                   | ND                    | ND                    | ND                    | ND                  | ND                   | ND           | ND           |
|        |         | Sevuparin/DF02+<br>Malanil | D14       | NEGATIVE | 0                          | ND                   | ND                    | ND                    | ND                    | ND                  | ND                   | ND           | ND           |
|        |         | Sevuparin/DF02+<br>Malanil | SCREENING | Pf       | 97440                      | ND                   | ND                    | ND                    | ND                    | ND                  | ND                   | ND           | ND           |
|        |         | Sevuparin/DF02+<br>Malanil | D1H0      | Pf       | 77140                      | 7                    | 40                    | 45                    | 8                     | 0                   | 0                    | 0            | 0            |
|        |         | Sevuparin/DF02+<br>Malanil | D1H1      | Pf       | 60900                      | 1                    | 31                    | 39                    | 29                    | 0                   | 0                    | 0            | 0            |
|        |         | Sevuparin/DF02+<br>Malanil | D1H2      | Pf       | 56840                      | 1                    | 41                    | 41                    | 17                    | 0                   | 0                    | 0            | 0            |
|        |         | Sevuparin/DF02+<br>Malanil | D1H3      | Pf       | 64960                      | 5                    | 38                    | 34                    | 23                    | 0                   | 0                    | 0            | 0            |
|        |         | Sevuparin/DF02+<br>Malanil | D1H4      | Pf       | 60900                      | 0                    | 30                    | 32                    | 38                    | 0                   | 0                    | 0            | 0            |
|        |         | Sevuparin/DF02+<br>Malanil | D1H6      | Pf       | 85260                      | 1                    | 23                    | 42                    | 34                    | 0                   | 0                    | 0            | 0            |
|        |         | Sevuparin/DF02+<br>Malanil | D1H8      | Pf       | 77140                      | 6                    | 40                    | 31                    | 23                    | 0                   | 0                    | 0            | 0            |
|        |         | Sevuparin/DF02+<br>Malanil | D1H10     | Pf       | 77140                      | 2                    | 14                    | 30                    | 54                    | 0                   | 0                    | 0            | 0            |
|        |         | Sevuparin/DF02+<br>Malanil | D1H11     | Pf       | 73080                      | 0                    | 18                    | 24                    | 58                    | 0                   | 0                    | 0            | 0            |
|        |         | Sevuparin/DF02+<br>Malanil | D1H17     | Pf       | 44333                      | 0                    | 12                    | 22                    | 58                    | 8                   | 0                    | 0            | 0            |

## TSM02 Individual subject listings part 2

## CSR Appendix 16.2

| SUBJID | INITIAL | ARM                        | TIMEPOINT | SPECIES  | PARASITAEMIA<br>( $\mu$ L) | Tiny<br>Rings<br>(%) | Small<br>Rings<br>(%) | Large<br>Rings<br>(%) | Early<br>Troph<br>(%) | Mid<br>Troph<br>(%) | Late<br>Troph<br>(%) | Gamet<br>(%) | Schiz<br>(%) |
|--------|---------|----------------------------|-----------|----------|----------------------------|----------------------|-----------------------|-----------------------|-----------------------|---------------------|----------------------|--------------|--------------|
|        |         | Malanil                    |           |          |                            |                      |                       |                       |                       |                     |                      |              |              |
|        |         | Sevuparin/DF02+<br>Malanil | D1H23     | Pf       | 31109                      | 0                    | 12                    | 18                    | 55                    | 14                  | 1                    | 0            | 0            |
|        |         | Sevuparin/DF02+<br>Malanil | D1H29     | Pf       | 14935                      | 0                    | 14                    | 18                    | 54                    | 8                   | 6                    | 0            | 0            |
|        |         | Sevuparin/DF02+<br>Malanil | D2H35     | Pf       | 5825                       | ND                   | ND                    | ND                    | ND                    | ND                  | ND                   | ND           | ND           |
|        |         | Sevuparin/DF02+<br>Malanil | D2H41     | Pf       | 1468                       | ND                   | ND                    | ND                    | ND                    | ND                  | ND                   | ND           | ND           |
|        |         | Sevuparin/DF02+<br>Malanil | D3H47     | Pf       | 868                        | ND                   | ND                    | ND                    | ND                    | ND                  | ND                   | ND           | ND           |
|        |         | Sevuparin/DF02+<br>Malanil | D3H53     | Pf       | 690                        | ND                   | ND                    | ND                    | ND                    | ND                  | ND                   | ND           | ND           |
|        |         | Sevuparin/DF02+<br>Malanil | D3H59     | Pf       | 334                        | ND                   | ND                    | ND                    | ND                    | ND                  | ND                   | ND           | ND           |
|        |         | Sevuparin/DF02+<br>Malanil | D3H65     | Pf       | 89                         | ND                   | ND                    | ND                    | ND                    | ND                  | ND                   | ND           | ND           |
|        |         | Sevuparin/DF02+<br>Malanil | D3H71     | Pf       | 22                         | ND                   | ND                    | ND                    | ND                    | ND                  | ND                   | ND           | ND           |
|        |         | Sevuparin/DF02+<br>Malanil | D4        | NEGATIVE | 0                          | ND                   | ND                    | ND                    | ND                    | ND                  | ND                   | ND           | ND           |
|        |         | Sevuparin/DF02+<br>Malanil | D5        | NEGATIVE | 0                          | ND                   | ND                    | ND                    | ND                    | ND                  | ND                   | ND           | ND           |
|        |         | Sevuparin/DF02+<br>Malanil | D7        | NEGATIVE | 0                          | ND                   | ND                    | ND                    | ND                    | ND                  | ND                   | ND           | ND           |
|        |         | Sevuparin/DF02+<br>Malanil | D14       | NEGATIVE | 0                          | ND                   | ND                    | ND                    | ND                    | ND                  | ND                   | ND           | ND           |

## TSM02 Individual subject listings part 2

## CSR Appendix 16.2

| SUBJID | INITIAL | ARM     | TIMEPOINT | SPECIES  | PARASITAEMIA<br>( $\mu$ L) | Tiny<br>Rings<br>(%) | Small<br>Rings<br>(%) | Large<br>Rings<br>(%) | Early<br>Troph<br>(%) | Mid<br>Troph<br>(%) | Late<br>Troph<br>(%) | Gamet<br>(%) | Schiz<br>(%) |
|--------|---------|---------|-----------|----------|----------------------------|----------------------|-----------------------|-----------------------|-----------------------|---------------------|----------------------|--------------|--------------|
|        |         | Malanil | SCREENING | Pf       | 25031                      | 16                   | 29                    | 23                    | 28                    | 4                   | 0                    | 0            | 0            |
|        |         | Malanil | D1H0      | Pf       | 14740                      | 5                    | 20                    | 37                    | 32                    | 5                   | 0                    | 1            | 0            |
|        |         | Malanil | D1H1      | Pf       | 15517                      | 22                   | 46                    | 19                    | 13                    | 0                   | 0                    | 0            | 0            |
|        |         | Malanil | D1H2      | Pf       | 17072                      | 23                   | 41                    | 21                    | 15                    | 0                   | 0                    | 0            | 0            |
|        |         | Malanil | D1H3      | Pf       | 14526                      | 14                   | 41                    | 19                    | 26                    | 0                   | 0                    | 0            | 0            |
|        |         | Malanil | D1H4      | Pf       | 13829                      | 22                   | 21                    | 18                    | 39                    | 0                   | 0                    | 0            | 0            |
|        |         | Malanil | D1H6      | Pf       | 13909                      | 25                   | 30                    | 19                    | 22                    | 4                   | 0                    | 0            | 0            |
|        |         | Malanil | D1H8      | Pf       | 11497                      | 17                   | 33                    | 23                    | 24                    | 3                   | 0                    | 0            | 0            |
|        |         | Malanil | D1H10     | Pf       | 8790                       | 47                   | 31                    | 9                     | 13                    | 0                   | 0                    | 0            | 0            |
|        |         | Malanil | D1H11     | Pf       | 8362                       | 6                    | 20                    | 18                    | 52                    | 4                   | 0                    | 0            | 0            |
|        |         | Malanil | D1H17     | Pf       | 5574                       | 25                   | 37                    | 16                    | 18                    | 4                   | 0                    | 0            | 0            |
|        |         | Malanil | D1H23     | Pf       | 2265                       | 37                   | 27                    | 8                     | 26                    | 2                   | 0                    | 0            | 0            |
|        |         | Malanil | D1H29     | Pf       | 1251                       | ND                   | ND                    | ND                    | ND                    | ND                  | ND                   | ND           | ND           |
|        |         | Malanil | D2H35     | Pf       | 794                        | ND                   | ND                    | ND                    | ND                    | ND                  | ND                   | ND           | ND           |
|        |         | Malanil | D2H41     | Pf       | 473                        | ND                   | ND                    | ND                    | ND                    | ND                  | ND                   | ND           | ND           |
|        |         | Malanil | D3H47     | Pf       | 265                        | ND                   | ND                    | ND                    | ND                    | ND                  | ND                   | ND           | ND           |
|        |         | Malanil | D3H53     | Pf       | 38                         | ND                   | ND                    | ND                    | ND                    | ND                  | ND                   | ND           | ND           |
|        |         | Malanil | D3H59     | NEGATIVE | 0                          | ND                   | ND                    | ND                    | ND                    | ND                  | ND                   | ND           | ND           |
|        |         | Malanil | D3H65     | NEGATIVE | 0                          | ND                   | ND                    | ND                    | ND                    | ND                  | ND                   | ND           | ND           |
|        |         | Malanil | D7        | NEGATIVE | 0                          | ND                   | ND                    | ND                    | ND                    | ND                  | ND                   | ND           | ND           |
|        |         | Malanil | D14       | NEGATIVE | 0                          | ND                   | ND                    | ND                    | ND                    | ND                  | ND                   | ND           | ND           |
|        |         | Malanil | SCREENING | Pf       | 11428                      | 4                    | 16                    | 19                    | 61                    | 0                   | 0                    | 0            | 0            |

## TSM02 Individual subject listings part 2

## CSR Appendix 16.2

| SUBJID | INITIAL | ARM                        | TIMEPOINT | SPECIES  | PARASITAEMIA<br>( $\mu$ L) | Tiny<br>Rings<br>(%) | Small<br>Rings<br>(%) | Large<br>Rings<br>(%) | Early<br>Troph<br>(%) | Mid<br>Troph<br>(%) | Late<br>Troph<br>(%) | Gamet<br>(%) | Schiz<br>(%) |
|--------|---------|----------------------------|-----------|----------|----------------------------|----------------------|-----------------------|-----------------------|-----------------------|---------------------|----------------------|--------------|--------------|
|        |         | Malanil                    | D1H0      | Pf       | 10815                      | 4                    | 21                    | 25                    | 50                    | 0                   | 0                    | 0            | 0            |
|        |         | Malanil                    | D1H1      | Pf       | 11543                      | 25                   | 22                    | 17                    | 33                    | 3                   | 0                    | 0            | 0            |
|        |         | Malanil                    | D1H2      | Pf       | 9204                       | 29                   | 33                    | 4                     | 32                    | 2                   | 0                    | 0            | 0            |
|        |         | Malanil                    | D1H3      | Pf       | 8590                       | 57                   | 20                    | 7                     | 16                    | 0                   | 0                    | 0            | 0            |
|        |         | Malanil                    | D1H4      | Pf       | 8284                       | 57                   | 25                    | 5                     | 10                    | 3                   | 0                    | 0            | 0            |
|        |         | Malanil                    | D1H6      | Pf       | 8322                       | 41                   | 37                    | 15                    | 7                     | 0                   | 0                    | 0            | 0            |
|        |         | Malanil                    | D1H8      | Pf       | 4449                       | 69                   | 26                    | 4                     | 1                     | 0                   | 0                    | 0            | 0            |
|        |         | Malanil                    | D1H10     | Pf       | 5407                       | 55                   | 28                    | 6                     | 11                    | 0                   | 0                    | 0            | 0            |
|        |         | Malanil                    | D1H11     | Pf       | 5484                       | 37                   | 22                    | 16                    | 25                    | 0                   | 0                    | 0            | 0            |
|        |         | Malanil                    | D1H17     | Pf       | 1956                       | 30                   | 40                    | 10                    | 20                    | 0                   | 0                    | 0            | 0            |
|        |         | Malanil                    | D1H23     | Pf       | 1060                       | ND                   | ND                    | ND                    | ND                    | ND                  | ND                   | ND           | ND           |
|        |         | Malanil                    | D1H29     | Pf       | 1855                       | ND                   | ND                    | ND                    | ND                    | ND                  | ND                   | ND           | ND           |
|        |         | Malanil                    | D2H35     | Pf       | 477                        | ND                   | ND                    | ND                    | ND                    | ND                  | ND                   | ND           | ND           |
|        |         | Malanil                    | D2H41     | Pf       | 239                        | ND                   | ND                    | ND                    | ND                    | ND                  | ND                   | ND           | ND           |
|        |         | Malanil                    | D3H47     | Pf       | 24                         | ND                   | ND                    | ND                    | ND                    | ND                  | ND                   | ND           | ND           |
|        |         | Malanil                    | D3H53     | NEGATIVE | 0                          | ND                   | ND                    | ND                    | ND                    | ND                  | ND                   | ND           | ND           |
|        |         | Malanil                    | D3H59     | NEGATIVE | 0                          | ND                   | ND                    | ND                    | ND                    | ND                  | ND                   | ND           | ND           |
|        |         | Malanil                    | D7        | NEGATIVE | 0                          | ND                   | ND                    | ND                    | ND                    | ND                  | ND                   | ND           | ND           |
|        |         | Malanil                    | D14       | NEGATIVE | 0                          | ND                   | ND                    | ND                    | ND                    | ND                  | ND                   | ND           | ND           |
|        |         | Sevuparin/DF02+<br>Malanil | SCREENING | Pf       | 93960                      | ND                   | ND                    | ND                    | ND                    | ND                  | ND                   | ND           | ND           |
|        |         | Sevuparin/DF02+<br>Malanil | D1H0      | Pf       | 93960                      | 51                   | 37                    | 12                    | 0                     | 0                   | 0                    | 0            | 0            |

## TSM02 Individual subject listings part 2

## CSR Appendix 16.2

| SUBJID | INITIAL | ARM                        | TIMEPOINT | SPECIES | PARASITAEMIA<br>( $\mu$ L) | Tiny<br>Rings<br>(%) | Small<br>Rings<br>(%) | Large<br>Rings<br>(%) | Early<br>Troph<br>(%) | Mid<br>Troph<br>(%) | Late<br>Troph<br>(%) | Gamet<br>(%) | Schiz<br>(%) |
|--------|---------|----------------------------|-----------|---------|----------------------------|----------------------|-----------------------|-----------------------|-----------------------|---------------------|----------------------|--------------|--------------|
|        |         | Sevuparin/DF02+<br>Malanil | D1H1      | Pf      | 88740                      | 58                   | 32                    | 10                    | 0                     | 0                   | 0                    | 0            | 0            |
|        |         | Sevuparin/DF02+<br>Malanil | D1H2      | Pf      | 83520                      | 57                   | 31                    | 8                     | 4                     | 0                   | 0                    | 0            | 0            |
|        |         | Sevuparin/DF02+<br>Malanil | D1H3      | Pf      | 78300                      | 74                   | 25                    | 1                     | 0                     | 0                   | 0                    | 0            | 0            |
|        |         | Sevuparin/DF02+<br>Malanil | D1H4      | Pf      | 52200                      | 80                   | 20                    | 0                     | 0                     | 0                   | 0                    | 0            | 0            |
|        |         | Sevuparin/DF02+<br>Malanil | D1H6      | Pf      | 41760                      | 40                   | 26                    | 14                    | 18                    | 2                   | 0                    | 0            | 0            |
|        |         | Sevuparin/DF02+<br>Malanil | D1H8      | Pf      | 31320                      | 21                   | 26                    | 20                    | 31                    | 1                   | 1                    | 0            | 0            |
|        |         | Sevuparin/DF02+<br>Malanil | D1H10     | Pf      | 26100                      | 11                   | 19                    | 19                    | 51                    | 0                   | 0                    | 0            | 0            |
|        |         | Sevuparin/DF02+<br>Malanil | D1H11     | Pf      | 20880                      | 4                    | 21                    | 27                    | 48                    | 0                   | 0                    | 0            | 0            |
|        |         | Sevuparin/DF02+<br>Malanil | D1H17     | Pf      | 10622                      | 0                    | 7                     | 20                    | 69                    | 4                   | 0                    | 0            | 0            |
|        |         | Sevuparin/DF02+<br>Malanil | D1H23     | Pf      | 9308                       | 0                    | 1                     | 16                    | 73                    | 8                   | 2                    | 0            | 0            |
|        |         | Sevuparin/DF02+<br>Malanil | D1H29     | Pf      | 7581                       | ND                   | ND                    | ND                    | ND                    | ND                  | ND                   | ND           | ND           |
|        |         | Sevuparin/DF02+<br>Malanil | D2H35     | Pf      | 4910                       | ND                   | ND                    | ND                    | ND                    | ND                  | ND                   | ND           | ND           |
|        |         | Sevuparin/DF02+<br>Malanil | D2H41     | Pf      | 758                        | ND                   | ND                    | ND                    | ND                    | ND                  | ND                   | ND           | ND           |
|        |         | Sevuparin/DF02+<br>Malanil | D3H47     | Pf      | 199                        | ND                   | ND                    | ND                    | ND                    | ND                  | ND                   | ND           | ND           |



## TSM02 Individual subject listings part 2

## CSR Appendix 16.2

| SUBJID | INITIAL | ARM                        | TIMEPOINT | SPECIES  | PARASITAEMIA<br>( $\mu$ L) | Tiny<br>Rings<br>(%) | Small<br>Rings<br>(%) | Large<br>Rings<br>(%) | Early<br>Troph<br>(%) | Mid<br>Troph<br>(%) | Late<br>Troph<br>(%) | Gamet<br>(%) | Schiz<br>(%) |
|--------|---------|----------------------------|-----------|----------|----------------------------|----------------------|-----------------------|-----------------------|-----------------------|---------------------|----------------------|--------------|--------------|
|        |         | Malanil                    |           |          |                            |                      |                       |                       |                       |                     |                      |              |              |
|        |         | Sevuparin/DF02+<br>Malanil | D3H53     | Pf       | 53                         | ND                   | ND                    | ND                    | ND                    | ND                  | ND                   | ND           | ND           |
|        |         | Sevuparin/DF02+<br>Malanil | D3H59     | Pf       | 18                         | ND                   | ND                    | ND                    | ND                    | ND                  | ND                   | ND           | ND           |
|        |         | Sevuparin/DF02+<br>Malanil | D3H65     | NEGATIVE | 0                          | ND                   | ND                    | ND                    | ND                    | ND                  | ND                   | ND           | ND           |
|        |         | Sevuparin/DF02+<br>Malanil | D3H71     | NEGATIVE | 0                          | ND                   | ND                    | ND                    | ND                    | ND                  | ND                   | ND           | ND           |
|        |         | Sevuparin/DF02+<br>Malanil | D7        | NEGATIVE | 0                          | ND                   | ND                    | ND                    | ND                    | ND                  | ND                   | ND           | ND           |
|        |         | Sevuparin/DF02+<br>Malanil | D14       | NEGATIVE | 0                          | ND                   | ND                    | ND                    | ND                    | ND                  | ND                   | ND           | ND           |
|        |         | Malanil                    | SCREENING | Pf       | 11890                      | 42                   | 34                    | 17                    | 7                     | 0                   | 0                    | 0            | 0            |
|        |         | Malanil                    | D1H0      | Pf       | 16856                      | 26                   | 44                    | 18                    | 12                    | 0                   | 0                    | 0            | 0            |
|        |         | Malanil                    | D1H1      | Pf       | 19909                      | 44                   | 23                    | 6                     | 27                    | 0                   | 0                    | 0            | 0            |
|        |         | Malanil                    | D1H2      | Pf       | 24532                      | 29                   | 28                    | 8                     | 34                    | 1                   | 0                    | 0            | 0            |
|        |         | Malanil                    | D1H3      | Pf       | 34787                      | 31                   | 32                    | 13                    | 24                    | 0                   | 0                    | 0            | 0            |
|        |         | Malanil                    | D1H4      | Pf       | 31605                      | 47                   | 41                    | 8                     | 3                     | 0                   | 1                    | 0            | 0            |
|        |         | Malanil                    | D1H6      | Pf       | 40076                      | 23                   | 47                    | 13                    | 16                    | 1                   | 0                    | 0            | 0            |
|        |         | Malanil                    | D1H8      | Pf       | 28380                      | 36                   | 26                    | 16                    | 20                    | 2                   | 0                    | 0            | 0            |
|        |         | Malanil                    | D1H10     | Pf       | 24897                      | 13                   | 32                    | 22                    | 29                    | 4                   | 0                    | 0            | 0            |
|        |         | Malanil                    | D1H11     | Pf       | 18813                      | 23                   | 35                    | 11                    | 28                    | 2                   | 0                    | 1            | 0            |
|        |         | Malanil                    | D1H17     | Pf       | 19952                      | 9                    | 18                    | 17                    | 50                    | 6                   | 0                    | 0            | 0            |

## TSM02 Individual subject listings part 2

## CSR Appendix 16.2

| SUBJID | INITIAL | ARM                        | TIMEPOINT | SPECIES  | PARASITAEMIA<br>( $\mu$ L) | Tiny<br>Rings<br>(%) | Small<br>Rings<br>(%) | Large<br>Rings<br>(%) | Early<br>Troph<br>(%) | Mid<br>Troph<br>(%) | Late<br>Troph<br>(%) | Gamet<br>(%) | Schiz<br>(%) |
|--------|---------|----------------------------|-----------|----------|----------------------------|----------------------|-----------------------|-----------------------|-----------------------|---------------------|----------------------|--------------|--------------|
|        |         | Malanil                    | D1H23     | Pf       | 12460                      | 8                    | 18                    | 20                    | 50                    | 2                   | 2                    | 0            | 0            |
|        |         | Malanil                    | D1H29     | Pf       | 10858                      | 2                    | 12                    | 11                    | 55                    | 17                  | 3                    | 0            | 0            |
|        |         | Malanil                    | D2H35     | Pf       | 5838                       | ND                   | ND                    | ND                    | ND                    | ND                  | ND                   | ND           | ND           |
|        |         | Malanil                    | D2H41     | Pf       | 1673                       | ND                   | ND                    | ND                    | ND                    | ND                  | ND                   | ND           | ND           |
|        |         | Malanil                    | D3H47     | Pf       | 480                        | ND                   | ND                    | ND                    | ND                    | ND                  | ND                   | ND           | ND           |
|        |         | Malanil                    | D3H53     | Pf       | 218                        | ND                   | ND                    | ND                    | ND                    | ND                  | ND                   | ND           | ND           |
|        |         | Malanil                    | D3H59     | Pf       | 87                         | ND                   | ND                    | ND                    | ND                    | ND                  | ND                   | ND           | ND           |
|        |         | Malanil                    | D3H65     | Pf       | 0                          | ND                   | ND                    | ND                    | ND                    | ND                  | ND                   | ND           | ND           |
|        |         | Malanil                    | D3H71     | Pf       | 0                          | ND                   | ND                    | ND                    | ND                    | ND                  | ND                   | ND           | ND           |
|        |         | Malanil                    | D7        | NEGATIVE | 0                          | ND                   | ND                    | ND                    | ND                    | ND                  | ND                   | ND           | ND           |
|        |         | Sevuparin/DF02+<br>Malanil | SCREENING | Pf       | 11578                      | 7                    | 14                    | 13                    | 52                    | 12                  | 2                    | 0            | 0            |
|        |         | Sevuparin/DF02+<br>Malanil | D1H0      | Pf       | 7482                       | 24                   | 20                    | 14                    | 40                    | 2                   | 0                    | 0            | 0            |
|        |         | Sevuparin/DF02+<br>Malanil | D1H1      | Pf       | 6708                       | 16                   | 26                    | 13                    | 34                    | 11                  | 0                    | 0            | 0            |
|        |         | Sevuparin/DF02+<br>Malanil | D1H2      | Pf       | 5999                       | 4                    | 38                    | 21                    | 29                    | 4                   | 4                    | 0            | 0            |
|        |         | Sevuparin/DF02+<br>Malanil | D1H3      | Pf       | 4483                       | ND                   | ND                    | ND                    | ND                    | ND                  | ND                   | ND           | ND           |
|        |         | Sevuparin/DF02+<br>Malanil | D1H4      | Pf       | 5547                       | ND                   | ND                    | ND                    | ND                    | ND                  | ND                   | ND           | ND           |
|        |         | Sevuparin/DF02+<br>Malanil | D1H6      | Pf       | 2483                       | ND                   | ND                    | ND                    | ND                    | ND                  | ND                   | ND           | ND           |
|        |         | Sevuparin/DF02+<br>Malanil | D1H8      | Pf       | 1774                       | ND                   | ND                    | ND                    | ND                    | ND                  | ND                   | ND           | ND           |

## TSM02 Individual subject listings part 2

## CSR Appendix 16.2

| SUBJID | INITIAL | ARM                        | TIMEPOINT | SPECIES  | PARASITAEMIA<br>( $\mu$ L) | Tiny<br>Rings<br>(%) | Small<br>Rings<br>(%) | Large<br>Rings<br>(%) | Early<br>Troph<br>(%) | Mid<br>Troph<br>(%) | Late<br>Troph<br>(%) | Gamet<br>(%) | Schiz<br>(%) |
|--------|---------|----------------------------|-----------|----------|----------------------------|----------------------|-----------------------|-----------------------|-----------------------|---------------------|----------------------|--------------|--------------|
|        |         | Malanil                    |           |          |                            |                      |                       |                       |                       |                     |                      |              |              |
|        |         | Sevuparin/DF02+<br>Malanil | D1H10     | Pf       | 2258                       | ND                   | ND                    | ND                    | ND                    | ND                  | ND                   | ND           | ND           |
|        |         | Sevuparin/DF02+<br>Malanil | D1H11     | Pf       | 1387                       | ND                   | ND                    | ND                    | ND                    | ND                  | ND                   | ND           | ND           |
|        |         | Sevuparin/DF02+<br>Malanil | D1H17     | Pf       | 774                        | ND                   | ND                    | ND                    | ND                    | ND                  | ND                   | ND           | ND           |
|        |         | Sevuparin/DF02+<br>Malanil | D1H23     | Pf       | 355                        | ND                   | ND                    | ND                    | ND                    | ND                  | ND                   | ND           | ND           |
|        |         | Sevuparin/DF02+<br>Malanil | D1H29     | Pf       | 180                        | ND                   | ND                    | ND                    | ND                    | ND                  | ND                   | ND           | ND           |
|        |         | Sevuparin/DF02+<br>Malanil | D2H35     | Pf       | 77                         | ND                   | ND                    | ND                    | ND                    | ND                  | ND                   | ND           | ND           |
|        |         | Sevuparin/DF02+<br>Malanil | D2H41     | NEGATIVE | 0                          | ND                   | ND                    | ND                    | ND                    | ND                  | ND                   | ND           | ND           |
|        |         | Sevuparin/DF02+<br>Malanil | D3H47     | NEGATIVE | 0                          | ND                   | ND                    | ND                    | ND                    | ND                  | ND                   | ND           | ND           |
|        |         | Sevuparin/DF02+<br>Malanil | D3H53     | NEGATIVE | 0                          | ND                   | ND                    | ND                    | ND                    | ND                  | ND                   | ND           | ND           |
|        |         | Sevuparin/DF02+<br>Malanil | D3H59     | NEGATIVE | 0                          | ND                   | ND                    | ND                    | ND                    | ND                  | ND                   | ND           | ND           |
|        |         | Sevuparin/DF02+<br>Malanil | D3H65     | NEGATIVE | 0                          | ND                   | ND                    | ND                    | ND                    | ND                  | ND                   | ND           | ND           |
|        |         | Sevuparin/DF02+<br>Malanil | D3H71     | NEGATIVE | 0                          | ND                   | ND                    | ND                    | ND                    | ND                  | ND                   | ND           | ND           |
|        |         | Sevuparin/DF02+<br>Malanil | D7        | NEGATIVE | 0                          | ND                   | ND                    | ND                    | ND                    | ND                  | ND                   | ND           | ND           |

## TSM02 Individual subject listings part 2

## CSR Appendix 16.2

| SUBJID | INITIAL | ARM                        | TIMEPOINT | SPECIES  | PARASITAEMIA<br>( $\mu$ L) | Tiny<br>Rings<br>(%) | Small<br>Rings<br>(%) | Large<br>Rings<br>(%) | Early<br>Troph<br>(%) | Mid<br>Troph<br>(%) | Late<br>Troph<br>(%) | Gamet<br>(%) | Schiz<br>(%) |
|--------|---------|----------------------------|-----------|----------|----------------------------|----------------------|-----------------------|-----------------------|-----------------------|---------------------|----------------------|--------------|--------------|
|        |         | Sevuparin/DF02+<br>Malanil | D14       | NEGATIVE | 0                          | ND                   | ND                    | ND                    | ND                    | ND                  | ND                   | ND           | ND           |
|        |         | Sevuparin/DF02+<br>Malanil | SCREENING | Pf       | 82980                      | 12                   | 38                    | 28                    | 22                    | 0                   | 0                    | 0            | 0            |
|        |         | Sevuparin/DF02+<br>Malanil | D1H0      | Pf       | 96810                      | 2                    | 43                    | 26                    | 27                    | 2                   | 0                    | 0            | 0            |
|        |         | Sevuparin/DF02+<br>Malanil | D1H1      | Pf       | 106030                     | 24                   | 46                    | 17                    | 13                    | 0                   | 0                    | 0            | 0            |
|        |         | Sevuparin/DF02+<br>Malanil | D1H2      | Pf       | 92200                      | 20                   | 34                    | 19                    | 26                    | 1                   | 0                    | 0            | 0            |
|        |         | Sevuparin/DF02+<br>Malanil | D1H3      | Pf       | 87590                      | 13                   | 40                    | 28                    | 19                    | 0                   | 0                    | 0            | 0            |
|        |         | Sevuparin/DF02+<br>Malanil | D1H4      | Pf       | 82980                      | 23                   | 48                    | 11                    | 17                    | 1                   | 0                    | 0            | 0            |
|        |         | Sevuparin/DF02+<br>Malanil | D1H6      | Pf       | 78370                      | 39                   | 45                    | 10                    | 4                     | 2                   | 0                    | 0            | 0            |
|        |         | Sevuparin/DF02+<br>Malanil | D1H8      | Pf       | 73760                      | 42                   | 46                    | 8                     | 4                     | 0                   | 0                    | 0            | 0            |
|        |         | Sevuparin/DF02+<br>Malanil | D1H10     | Pf       | 55320                      | 37                   | 42                    | 13                    | 8                     | 0                   | 0                    | 0            | 0            |
|        |         | Sevuparin/DF02+<br>Malanil | D1H11     | Pf       | 50710                      | 35                   | 45                    | 13                    | 7                     | 0                   | 0                    | 0            | 0            |
|        |         | Sevuparin/DF02+<br>Malanil | D1H17     | Pf       | 50710                      | 12                   | 41                    | 27                    | 20                    | 0                   | 0                    | 0            | 0            |
|        |         | Sevuparin/DF02+<br>Malanil | D1H23     | Pf       | 53071                      | 8                    | 32                    | 19                    | 41                    | 0                   | 0                    | 0            | 0            |
|        |         | Sevuparin/DF02+<br>Malanil | D1H29     | Pf       | 22695                      | 1                    | 15                    | 17                    | 65                    | 2                   | 0                    | 0            | 0            |

## TSM02 Individual subject listings part 2

## CSR Appendix 16.2

| SUBJID | INITIAL | ARM                        | TIMEPOINT | SPECIES | PARASITAEMIA<br>( $\mu$ L) | Tiny<br>Rings<br>(%) | Small<br>Rings<br>(%) | Large<br>Rings<br>(%) | Early<br>Troph<br>(%) | Mid<br>Troph<br>(%) | Late<br>Troph<br>(%) | Gamet<br>(%) | Schiz<br>(%) |
|--------|---------|----------------------------|-----------|---------|----------------------------|----------------------|-----------------------|-----------------------|-----------------------|---------------------|----------------------|--------------|--------------|
|        |         | Malanil                    |           |         |                            |                      |                       |                       |                       |                     |                      |              |              |
|        |         | Sevuparin/DF02+<br>Malanil | D2H35     | Pf      | 5085                       | ND                   | ND                    | ND                    | ND                    | ND                  | ND                   | ND           | ND           |
|        |         | Sevuparin/DF02+<br>Malanil | D2H41     | Pf      | 1503                       | ND                   | ND                    | ND                    | ND                    | ND                  | ND                   | ND           | ND           |
|        |         | Sevuparin/DF02+<br>Malanil | D3H47     | Pf      | 701                        | ND                   | ND                    | ND                    | ND                    | ND                  | ND                   | ND           | ND           |
|        |         | Sevuparin/DF02+<br>Malanil | D3H53     | Pf      | 348                        | ND                   | ND                    | ND                    | ND                    | ND                  | ND                   | ND           | ND           |
|        |         | Sevuparin/DF02+<br>Malanil | D3H59     | Pf      | 196                        | ND                   | ND                    | ND                    | ND                    | ND                  | ND                   | ND           | ND           |
|        |         | Sevuparin/DF02+<br>Malanil | D3H65     | Pf      | 0                          | ND                   | ND                    | ND                    | ND                    | ND                  | ND                   | ND           | ND           |
|        |         | Sevuparin/DF02+<br>Malanil | D3H71     | Pf      | 0                          | ND                   | ND                    | ND                    | ND                    | ND                  | ND                   | ND           | ND           |
|        |         | Sevuparin/DF02+<br>Malanil | D7        | Pf      | 0                          | ND                   | ND                    | ND                    | ND                    | ND                  | ND                   | ND           | ND           |
|        |         | Sevuparin/DF02+<br>Malanil | D14       | Pf      | 0                          | ND                   | ND                    | ND                    | ND                    | ND                  | ND                   | ND           | ND           |
|        |         | Malanil                    | SCREENING | Pf      | 18216                      | 3                    | 10                    | 20                    | 39                    | 16                  | 12                   | 0            | 0            |
|        |         | Malanil                    | D1H0      | Pf      | 20134                      | 7                    | 24                    | 14                    | 32                    | 14                  | 9                    | 0            | 0            |
|        |         | Malanil                    | D1H1      | Pf      | 20671                      | 17                   | 23                    | 17                    | 30                    | 8                   | 5                    | 0            | 0            |
|        |         | Malanil                    | D1H2      | Pf      | 19942                      | 14                   | 21                    | 10                    | 32                    | 14                  | 9                    | 0            | 0            |
|        |         | Malanil                    | D1H3      | Pf      | 19098                      | 11                   | 25                    | 15                    | 22                    | 9                   | 18                   | 0            | 0            |
|        |         | Malanil                    | D1H4      | Pf      | 17641                      | 15                   | 31                    | 7                     | 19                    | 11                  | 17                   | 0            | 0            |

## TSM02 Individual subject listings part 2

## CSR Appendix 16.2

| SUBJID | INITIAL | ARM     | TIMEPOINT | SPECIES  | PARASITAEMIA<br>( $\mu$ L) | Tiny<br>Rings<br>(%) | Small<br>Rings<br>(%) | Large<br>Rings<br>(%) | Early<br>Troph<br>(%) | Mid<br>Troph<br>(%) | Late<br>Troph<br>(%) | Gamet<br>(%) | Schiz<br>(%) |
|--------|---------|---------|-----------|----------|----------------------------|----------------------|-----------------------|-----------------------|-----------------------|---------------------|----------------------|--------------|--------------|
|        |         | Malanil | D1H6      | Pf       | 14074                      | 37                   | 37                    | 10                    | 9                     | 5                   | 2                    | 0            | 0            |
|        |         | Malanil | D1H8      | Pf       | 11083                      | 25                   | 34                    | 16                    | 19                    | 3                   | 3                    | 0            | 0            |
|        |         | Malanil | D1H10     | Pf       | 8936                       | 58                   | 42                    | 0                     | 0                     | 0                   | 0                    | 0            | 0            |
|        |         | Malanil | D1H11     | Pf       | 25004                      | 30                   | 26                    | 4                     | 22                    | 12                  | 6                    | 0            | 0            |
|        |         | Malanil | D1H17     | Pf       | 5561                       | ND                   | ND                    | ND                    | ND                    | ND                  | ND                   | ND           | ND           |
|        |         | Malanil | D1H23     | Pf       | 2968                       | ND                   | ND                    | ND                    | ND                    | ND                  | ND                   | ND           | ND           |
|        |         | Malanil | D1H29     | Pf       | 2767                       | ND                   | ND                    | ND                    | ND                    | ND                  | ND                   | ND           | ND           |
|        |         | Malanil | D2H35     | Pf       | 905                        | ND                   | ND                    | ND                    | ND                    | ND                  | ND                   | ND           | ND           |
|        |         | Malanil | D2H41     | Pf       | 302                        | ND                   | ND                    | ND                    | ND                    | ND                  | ND                   | ND           | ND           |
|        |         | Malanil | D3H47     | Pf       | 75                         | ND                   | ND                    | ND                    | ND                    | ND                  | ND                   | ND           | ND           |
|        |         | Malanil | D3H53     | Pf       | 25                         | ND                   | ND                    | ND                    | ND                    | ND                  | ND                   | ND           | ND           |
|        |         | Malanil | D3H59     | NEGATIVE | 0                          | ND                   | ND                    | ND                    | ND                    | ND                  | ND                   | ND           | ND           |
|        |         | Malanil | D3H65     | NEGATIVE | 0                          | ND                   | ND                    | ND                    | ND                    | ND                  | ND                   | ND           | ND           |
|        |         | Malanil | D7        | NEGATIVE | 0                          | ND                   | ND                    | ND                    | ND                    | ND                  | ND                   | ND           | ND           |
|        |         | Malanil | D14       | NEGATIVE | 0                          | ND                   | ND                    | ND                    | ND                    | ND                  | ND                   | ND           | ND           |
|        |         | Malanil | SCREENING | Pf       | 11494                      | 60                   | 34                    | 0                     | 6                     | 0                   | 0                    | 0            | 0            |
|        |         | Malanil | D1H0      | Pf       | 24397                      | 74                   | 16                    | 6                     | 4                     | 0                   | 0                    | 0            | 0            |
|        |         | Malanil | D1H1      | Pf       | 27896                      | 75                   | 19                    | 4                     | 1                     | 0                   | 1                    | 0            | 0            |
|        |         | Malanil | D1H2      | Pf       | 57640                      | 50                   | 36                    | 8                     | 5                     | 1                   | 0                    | 0            | 0            |
|        |         | Malanil | D1H3      | Pf       | 32999                      | 50                   | 38                    | 6                     | 6                     | 0                   | 0                    | 0            | 0            |
|        |         | Malanil | D1H4      | Pf       | 38686                      | 58                   | 35                    | 5                     | 2                     | 0                   | 0                    | 0            | 0            |

## TSM02 Individual subject listings part 2

## CSR Appendix 16.2

| SUBJID | INITIAL | ARM                        | TIMEPOINT | SPECIES  | PARASITAEMIA<br>( $\mu$ L) | Tiny<br>Rings<br>(%) | Small<br>Rings<br>(%) | Large<br>Rings<br>(%) | Early<br>Troph<br>(%) | Mid<br>Troph<br>(%) | Late<br>Troph<br>(%) | Gamet<br>(%) | Schiz<br>(%) |
|--------|---------|----------------------------|-----------|----------|----------------------------|----------------------|-----------------------|-----------------------|-----------------------|---------------------|----------------------|--------------|--------------|
|        |         | Malanil                    | D1H6      | Pf       | 33291                      | 42                   | 36                    | 11                    | 11                    | 0                   | 0                    | 0            | 0            |
|        |         | Malanil                    | D1H8      | Pf       | 32975                      | 20                   | 38                    | 22                    | 19                    | 1                   | 0                    | 0            | 0            |
|        |         | Malanil                    | D1H10     | Pf       | 29354                      | 52                   | 42                    | 6                     | 0                     | 0                   | 0                    | 0            | 0            |
|        |         | Malanil                    | D1H11     | Pf       | 23182                      | 46                   | 41                    | 11                    | 2                     | 0                   | 0                    | 0            | 0            |
|        |         | Malanil                    | D1H17     | Pf       | 22672                      | 25                   | 33                    | 21                    | 19                    | 2                   | 0                    | 0            | 0            |
|        |         | Malanil                    | D1H23     | Pf       | 15233                      | 6                    | 23                    | 23                    | 36                    | 12                  | 0                    | 0            | 0            |
|        |         | Malanil                    | D1H29     | Pf       | 14830                      | 5                    | 25                    | 18                    | 47                    | 5                   | 0                    | 0            | 0            |
|        |         | Malanil                    | D2H35     | Pf       | 6307                       | 2                    | 19                    | 13                    | 44                    | 19                  | 3                    | 0            | 0            |
|        |         | Malanil                    | D2H41     | Pf       | 2257                       | ND                   | ND                    | ND                    | ND                    | ND                  | ND                   | ND           | ND           |
|        |         | Malanil                    | D3H47     | Pf       | 546                        | ND                   | ND                    | ND                    | ND                    | ND                  | ND                   | ND           | ND           |
|        |         | Malanil                    | D3H53     | Pf       | 52                         | ND                   | ND                    | ND                    | ND                    | ND                  | ND                   | ND           | ND           |
|        |         | Malanil                    | D3H59     | NEGATIVE | 0                          | ND                   | ND                    | ND                    | ND                    | ND                  | ND                   | ND           | ND           |
|        |         | Malanil                    | D3H65     | NEGATIVE | 0                          | ND                   | ND                    | ND                    | ND                    | ND                  | ND                   | ND           | ND           |
|        |         | Malanil                    | D7        | Pf       | 0                          | ND                   | ND                    | ND                    | ND                    | ND                  | ND                   | ND           | ND           |
|        |         | Malanil                    | D14       | NEGATIVE | 0                          | ND                   | ND                    | ND                    | ND                    | ND                  | ND                   | ND           | ND           |
|        |         | Sevuparin/DF02+<br>Malanil | SCREENING | Pf       | 26062                      | 1                    | 0                     | 4                     | 60                    | 23                  | 12                   | 0            | 0            |
|        |         | Sevuparin/DF02+<br>Malanil | D1H0      | Pf       | 20161                      | 0                    | 1                     | 8                     | 58                    | 24                  | 9                    | 0            | 0            |
|        |         | Sevuparin/DF02+<br>Malanil | D1H1      | Pf       | 15089                      | 0                    | 0                     | 0                     | 14                    | 25                  | 61                   | 0            | 0            |
|        |         | Sevuparin/DF02+<br>Malanil | D1H2      | Pf       | 8485                       | 0                    | 1                     | 1                     | 2                     | 33                  | 63                   | 0            | 0            |
|        |         | Sevuparin/DF02+<br>Malanil | D1H3      | Pf       | 4913                       | 0                    | 0                     | 2                     | 22                    | 27                  | 49                   | 0            | 0            |

## TSM02 Individual subject listings part 2

## CSR Appendix 16.2

| SUBJID | INITIAL | ARM                        | TIMEPOINT | SPECIES  | PARASITAEMIA<br>( $\mu$ L) | Tiny<br>Rings<br>(%) | Small<br>Rings<br>(%) | Large<br>Rings<br>(%) | Early<br>Troph<br>(%) | Mid<br>Troph<br>(%) | Late<br>Troph<br>(%) | Gamet<br>(%) | Schiz<br>(%) |
|--------|---------|----------------------------|-----------|----------|----------------------------|----------------------|-----------------------|-----------------------|-----------------------|---------------------|----------------------|--------------|--------------|
|        |         | Malanil                    |           |          |                            |                      |                       |                       |                       |                     |                      |              |              |
|        |         | Sevuparin/DF02+<br>Malanil | D1H4      | Pf       | 1691                       | 0                    | 4                     | 7                     | 31                    | 29                  | 29                   | 0            | 0            |
|        |         | Sevuparin/DF02+<br>Malanil | D1H6      | Pf       | 526                        | 0                    | 12                    | 12                    | 28                    | 12                  | 36                   | 0            | 0            |
|        |         | Sevuparin/DF02+<br>Malanil | D1H8      | Pf       | 112                        | 0                    | 4                     | 8                     | 10                    | 26                  | 52                   | 0            | 0            |
|        |         | Sevuparin/DF02+<br>Malanil | D1H10     | Pf       | 64                         | ND                   | ND                    | ND                    | ND                    | ND                  | ND                   | ND           | ND           |
|        |         | Sevuparin/DF02+<br>Malanil | D1H11     | Pf       | 48                         | ND                   | ND                    | ND                    | ND                    | ND                  | ND                   | ND           | ND           |
|        |         | Sevuparin/DF02+<br>Malanil | D1H17     | Pf       | 32                         | ND                   | ND                    | ND                    | ND                    | ND                  | ND                   | ND           | ND           |
|        |         | Sevuparin/DF02+<br>Malanil | D1H23     | Pf       | 16                         | ND                   | ND                    | ND                    | ND                    | ND                  | ND                   | ND           | ND           |
|        |         | Sevuparin/DF02+<br>Malanil | D1H29     | NEGATIVE | 0                          | ND                   | ND                    | ND                    | ND                    | ND                  | ND                   | ND           | ND           |
|        |         | Sevuparin/DF02+<br>Malanil | D2H35     | NEGATIVE | 0                          | ND                   | ND                    | ND                    | ND                    | ND                  | ND                   | ND           | ND           |
|        |         | Sevuparin/DF02+<br>Malanil | D2H41     | NEGATIVE | 0                          | ND                   | ND                    | ND                    | ND                    | ND                  | ND                   | ND           | ND           |
|        |         | Sevuparin/DF02+<br>Malanil | D3H47     | NEGATIVE | 0                          | ND                   | ND                    | ND                    | ND                    | ND                  | ND                   | ND           | ND           |
|        |         | Sevuparin/DF02+<br>Malanil | D3H53     | NEGATIVE | 0                          | ND                   | ND                    | ND                    | ND                    | ND                  | ND                   | ND           | ND           |
|        |         | Sevuparin/DF02+<br>Malanil | D3H59     | NEGATIVE | 0                          | ND                   | ND                    | ND                    | ND                    | ND                  | ND                   | ND           | ND           |



## TSM02 Individual subject listings part 2

## CSR Appendix 16.2

| SUBJID | INITIAL | ARM                        | TIMEPOINT | SPECIES  | PARASITAEMIA<br>( $\mu$ L) | Tiny<br>Rings<br>(%) | Small<br>Rings<br>(%) | Large<br>Rings<br>(%) | Early<br>Troph<br>(%) | Mid<br>Troph<br>(%) | Late<br>Troph<br>(%) | Gamet<br>(%) | Schiz<br>(%) |
|--------|---------|----------------------------|-----------|----------|----------------------------|----------------------|-----------------------|-----------------------|-----------------------|---------------------|----------------------|--------------|--------------|
|        |         | Sevuparin/DF02+<br>Malanil | D3H65     | NEGATIVE | 0                          | ND                   | ND                    | ND                    | ND                    | ND                  | ND                   | ND           | ND           |
|        |         | Sevuparin/DF02+<br>Malanil | D3H71     | NEGATIVE | 0                          | ND                   | ND                    | ND                    | ND                    | ND                  | ND                   | ND           | ND           |
|        |         | Sevuparin/DF02+<br>Malanil | D7        | NEGATIVE | 0                          | ND                   | ND                    | ND                    | ND                    | ND                  | ND                   | ND           | ND           |
|        |         | Sevuparin/DF02+<br>Malanil | SCREENING | Pf       | 27492                      | 11                   | 20                    | 23                    | 34                    | 11                  | 1                    | 0            | 0            |
|        |         | Sevuparin/DF02+<br>Malanil | D1H0      | Pf       | 19434                      | 23                   | 24                    | 14                    | 27                    | 10                  | 2                    | 0            | 0            |
|        |         | Sevuparin/DF02+<br>Malanil | D1H1      | Pf       | 13438                      | 30                   | 22                    | 11                    | 24                    | 11                  | 2                    | 0            | 0            |
|        |         | Sevuparin/DF02+<br>Malanil | D1H2      | Pf       | 11708                      | 25                   | 13                    | 9                     | 44                    | 9                   | 0                    | 0            | 0            |
|        |         | Sevuparin/DF02+<br>Malanil | D1H3      | Pf       | 10073                      | 44                   | 25                    | 9                     | 19                    | 0                   | 3                    | 0            | 0            |
|        |         | Sevuparin/DF02+<br>Malanil | D1H4      | Pf       | 8864                       | 20                   | 20                    | 20                    | 28                    | 6                   | 6                    | 0            | 0            |
|        |         | Sevuparin/DF02+<br>Malanil | D1H6      | Pf       | 7229                       | 17                   | 21                    | 17                    | 23                    | 17                  | 5                    | 0            | 0            |
|        |         | Sevuparin/DF02+<br>Malanil | D1H8      | Pf       | 4740                       | 11                   | 18                    | 18                    | 37                    | 8                   | 8                    | 0            | 0            |
|        |         | Sevuparin/DF02+<br>Malanil | D1H10     | Pf       | 3200                       | ND                   | ND                    | ND                    | ND                    | ND                  | ND                   | ND           | ND           |
|        |         | Sevuparin/DF02+<br>Malanil | D1H11     | Pf       | 2963                       | ND                   | ND                    | ND                    | ND                    | ND                  | ND                   | ND           | ND           |
|        |         | Sevuparin/DF02+<br>Malanil | D1H17     | Pf       | 1351                       | ND                   | ND                    | ND                    | ND                    | ND                  | ND                   | ND           | ND           |

## TSM02 Individual subject listings part 2

## CSR Appendix 16.2

| SUBJID | INITIAL | ARM                        | TIMEPOINT | SPECIES  | PARASITAEMIA<br>( $\mu$ L) | Tiny<br>Rings<br>(%) | Small<br>Rings<br>(%) | Large<br>Rings<br>(%) | Early<br>Troph<br>(%) | Mid<br>Troph<br>(%) | Late<br>Troph<br>(%) | Gamet<br>(%) | Schiz<br>(%) |
|--------|---------|----------------------------|-----------|----------|----------------------------|----------------------|-----------------------|-----------------------|-----------------------|---------------------|----------------------|--------------|--------------|
|        |         | Malanil                    |           |          |                            |                      |                       |                       |                       |                     |                      |              |              |
|        |         | Sevuparin/DF02+<br>Malanil | D1H23     | Pf       | 640                        | ND                   | ND                    | ND                    | ND                    | ND                  | ND                   | ND           | ND           |
|        |         | Sevuparin/DF02+<br>Malanil | D1H29     | Pf       | 162                        | ND                   | ND                    | ND                    | ND                    | ND                  | ND                   | ND           | ND           |
|        |         | Sevuparin/DF02+<br>Malanil | D2H35     | Pf       | 22                         | ND                   | ND                    | ND                    | ND                    | ND                  | ND                   | ND           | ND           |
|        |         | Sevuparin/DF02+<br>Malanil | D2H41     | NEGATIVE | 0                          | ND                   | ND                    | ND                    | ND                    | ND                  | ND                   | ND           | ND           |
|        |         | Sevuparin/DF02+<br>Malanil | D3H47     | NEGATIVE | 0                          | ND                   | ND                    | ND                    | ND                    | ND                  | ND                   | ND           | ND           |
|        |         | Sevuparin/DF02+<br>Malanil | D3H53     | NEGATIVE | 0                          | ND                   | ND                    | ND                    | ND                    | ND                  | ND                   | ND           | ND           |
|        |         | Sevuparin/DF02+<br>Malanil | D3H59     | NEGATIVE | 0                          | ND                   | ND                    | ND                    | ND                    | ND                  | ND                   | ND           | ND           |
|        |         | Sevuparin/DF02+<br>Malanil | D3H65     | NEGATIVE | 0                          | ND                   | ND                    | ND                    | ND                    | ND                  | ND                   | ND           | ND           |
|        |         | Sevuparin/DF02+<br>Malanil | D3H71     | NEGATIVE | 0                          | ND                   | ND                    | ND                    | ND                    | ND                  | ND                   | ND           | ND           |
|        |         | Sevuparin/DF02+<br>Malanil | D7        | NEGATIVE | 0                          | ND                   | ND                    | ND                    | ND                    | ND                  | ND                   | ND           | ND           |
|        |         | Sevuparin/DF02+<br>Malanil | D14       | NEGATIVE | 0                          | ND                   | ND                    | ND                    | ND                    | ND                  | ND                   | ND           | ND           |
|        |         | Malanil                    | SCREENING | Pf       | 10886                      | 20                   | 25                    | 25                    | 25                    | 0                   | 5                    | 0            | 0            |
|        |         | Malanil                    | D1H0      | Pf       | 4956                       | 14                   | 21                    | 29                    | 36                    | 0                   | 0                    | 0            | 0            |
|        |         | Malanil                    | D1H1      | Pf       | 4632                       | ND                   | ND                    | ND                    | ND                    | ND                  | ND                   | ND           | ND           |

## TSM02 Individual subject listings part 2

## CSR Appendix 16.2

| SUBJID | INITIAL | ARM     | TIMEPOINT | SPECIES  | PARASITAEMIA<br>( $\mu$ L) | Tiny<br>Rings<br>(%) | Small<br>Rings<br>(%) | Large<br>Rings<br>(%) | Early<br>Troph<br>(%) | Mid<br>Troph<br>(%) | Late<br>Troph<br>(%) | Gamet<br>(%) | Schiz<br>(%) |
|--------|---------|---------|-----------|----------|----------------------------|----------------------|-----------------------|-----------------------|-----------------------|---------------------|----------------------|--------------|--------------|
|        |         | Malanil | D1H2      | Pf       | 4307                       | ND                   | ND                    | ND                    | ND                    | ND                  | ND                   | ND           | ND           |
|        |         | Malanil | D1H3      | Pf       | 3717                       | ND                   | ND                    | ND                    | ND                    | ND                  | ND                   | ND           | ND           |
|        |         | Malanil | D1H4      | Pf       | 2626                       | ND                   | ND                    | ND                    | ND                    | ND                  | ND                   | ND           | ND           |
|        |         | Malanil | D1H6      | Pf       | 1859                       | ND                   | ND                    | ND                    | ND                    | ND                  | ND                   | ND           | ND           |
|        |         | Malanil | D1H8      | Pf       | 1416                       | ND                   | ND                    | ND                    | ND                    | ND                  | ND                   | ND           | ND           |
|        |         | Malanil | D1H10     | Pf       | 1121                       | ND                   | ND                    | ND                    | ND                    | ND                  | ND                   | ND           | ND           |
|        |         | Malanil | D1H11     | Pf       | 915                        | ND                   | ND                    | ND                    | ND                    | ND                  | ND                   | ND           | ND           |
|        |         | Malanil | D1H17     | Pf       | 649                        | ND                   | ND                    | ND                    | ND                    | ND                  | ND                   | ND           | ND           |
|        |         | Malanil | D1H23     | Pf       | 157                        | ND                   | ND                    | ND                    | ND                    | ND                  | ND                   | ND           | ND           |
|        |         | Malanil | D1H29     | Pf       | 59                         | ND                   | ND                    | ND                    | ND                    | ND                  | ND                   | ND           | ND           |
|        |         | Malanil | D2H35     | Pf       | 20                         | ND                   | ND                    | ND                    | ND                    | ND                  | ND                   | ND           | ND           |
|        |         | Malanil | D2H41     | NEGATIVE | 0                          | ND                   | ND                    | ND                    | ND                    | ND                  | ND                   | ND           | ND           |
|        |         | Malanil | D3H47     | NEGATIVE | 0                          | ND                   | ND                    | ND                    | ND                    | ND                  | ND                   | ND           | ND           |
|        |         | Malanil | D3H53     | NEGATIVE | 0                          | ND                   | ND                    | ND                    | ND                    | ND                  | ND                   | ND           | ND           |
|        |         | Malanil | D3H59     | NEGATIVE | 0                          | ND                   | ND                    | ND                    | ND                    | ND                  | ND                   | ND           | ND           |
|        |         | Malanil | D3H65     | NEGATIVE | 0                          | ND                   | ND                    | ND                    | ND                    | ND                  | ND                   | ND           | ND           |
|        |         | Malanil | D3H71     | NEGATIVE | 0                          | ND                   | ND                    | ND                    | ND                    | ND                  | ND                   | ND           | ND           |
|        |         | Malanil | D7        | NEGATIVE | 0                          | ND                   | ND                    | ND                    | ND                    | ND                  | ND                   | ND           | ND           |
|        |         | Malanil | D14       | NEGATIVE | 0                          | ND                   | ND                    | ND                    | ND                    | ND                  | ND                   | ND           | ND           |
|        |         | Malanil | SCREENING | Pf       | 73500                      | 75                   | 23                    | 1                     | 1                     | 0                   | 0                    | 0            | 0            |
|        |         | Malanil | D1H0      | Pf       | 78400                      | 72                   | 22                    | 5                     | 1                     | 0                   | 0                    | 0            | 0            |
|        |         | Malanil | D1H1      | Pf       | 83300                      | 57                   | 40                    | 3                     | 0                     | 0                   | 0                    | 0            | 0            |

## TSM02 Individual subject listings part 2

## CSR Appendix 16.2

| SUBJID | INITIAL | ARM     | TIMEPOINT | SPECIES  | PARASITAEMIA<br>( $\mu$ L) | Tiny<br>Rings<br>(%) | Small<br>Rings<br>(%) | Large<br>Rings<br>(%) | Early<br>Troph<br>(%) | Mid<br>Troph<br>(%) | Late<br>Troph<br>(%) | Gamet<br>(%) | Schiz<br>(%) |
|--------|---------|---------|-----------|----------|----------------------------|----------------------|-----------------------|-----------------------|-----------------------|---------------------|----------------------|--------------|--------------|
|        |         | Malanil | D1H2      | Pf       | 112700                     | 70                   | 28                    | 2                     | 0                     | 0                   | 0                    | 0            | 0            |
|        |         | Malanil | D1H3      | Pf       | 122500                     | 70                   | 25                    | 5                     | 0                     | 0                   | 0                    | 0            | 0            |
|        |         | Malanil | D1H4      | Pf       | 112700                     | 70                   | 26                    | 4                     | 0                     | 0                   | 0                    | 0            | 0            |
|        |         | Malanil | D1H6      | Pf       | 98000                      | 72                   | 24                    | 4                     | 0                     | 0                   | 0                    | 0            | 0            |
|        |         | Malanil | D1H8      | Pf       | 98000                      | 46                   | 43                    | 11                    | 0                     | 0                   | 0                    | 0            | 0            |
|        |         | Malanil | D1H10     | Pf       | 88200                      | 34                   | 40                    | 15                    | 11                    | 0                   | 0                    | 0            | 0            |
|        |         | Malanil | D1H11     | Pf       | 83300                      | 31                   | 39                    | 14                    | 16                    | 0                   | 0                    | 0            | 0            |
|        |         | Malanil | D1H17     | Pf       | 68600                      | 8                    | 30                    | 22                    | 38                    | 2                   | 0                    | 0            | 0            |
|        |         | Malanil | D1H23     | Pf       | 47850                      | 2                    | 7                     | 14                    | 74                    | 3                   | 0                    | 0            | 0            |
|        |         | Malanil | D1H29     | Pf       | 24552                      | 0                    | 8                     | 13                    | 66                    | 13                  | 0                    | 0            | 0            |
|        |         | Malanil | D2H35     | Pf       | 9179                       | ND                   | ND                    | ND                    | ND                    | ND                  | ND                   | ND           | ND           |
|        |         | Malanil | D2H41     | Pf       | 2065                       | ND                   | ND                    | ND                    | ND                    | ND                  | ND                   | ND           | ND           |
|        |         | Malanil | D3H47     | Pf       | 817                        | ND                   | ND                    | ND                    | ND                    | ND                  | ND                   | ND           | ND           |
|        |         | Malanil | D3H53     | Pf       | 374                        | ND                   | ND                    | ND                    | ND                    | ND                  | ND                   | ND           | ND           |
|        |         | Malanil | D3H59     | Pf       | 93                         | ND                   | ND                    | ND                    | ND                    | ND                  | ND                   | ND           | ND           |
|        |         | Malanil | D3H65     | NEGATIVE | 0                          | ND                   | ND                    | ND                    | ND                    | ND                  | ND                   | ND           | ND           |
|        |         | Malanil | D3H71     | NEGATIVE | 0                          | ND                   | ND                    | ND                    | ND                    | ND                  | ND                   | ND           | ND           |
|        |         | Malanil | D7        | NEGATIVE | 0                          | ND                   | ND                    | ND                    | ND                    | ND                  | ND                   | ND           | ND           |
|        |         | Malanil | D14       | NEGATIVE | 0                          | ND                   | ND                    | ND                    | ND                    | ND                  | ND                   | ND           | ND           |
|        |         | Malanil | SCREENING | Pf       | 15691                      | 74                   | 22                    | 4                     | 0                     | 0                   | 0                    | 0            | 0            |
|        |         | Malanil | D1H0      | Pf       | 21412                      | 60                   | 22                    | 11                    | 7                     | 0                   | 0                    | 0            | 0            |
|        |         | Malanil | D1H1      | Pf       | 23350                      | 52                   | 33                    | 13                    | 2                     | 0                   | 0                    | 0            | 0            |

## TSM02 Individual subject listings part 2

## CSR Appendix 16.2

| SUBJID | INITIAL | ARM                        | TIMEPOINT | SPECIES  | PARASITAEMIA<br>( $\mu$ L) | Tiny<br>Rings<br>(%) | Small<br>Rings<br>(%) | Large<br>Rings<br>(%) | Early<br>Troph<br>(%) | Mid<br>Troph<br>(%) | Late<br>Troph<br>(%) | Gamet<br>(%) | Schiz<br>(%) |
|--------|---------|----------------------------|-----------|----------|----------------------------|----------------------|-----------------------|-----------------------|-----------------------|---------------------|----------------------|--------------|--------------|
|        |         | Malanil                    | D1H2      | Pf       | 24004                      | 38                   | 43                    | 12                    | 7                     | 0                   | 0                    | 0            | 0            |
|        |         | Malanil                    | D1H3      | Pf       | 24051                      | 40                   | 50                    | 5                     | 5                     | 0                   | 0                    | 0            | 0            |
|        |         | Malanil                    | D1H4      | Pf       | 22790                      | 23                   | 51                    | 21                    | 5                     | 0                   | 0                    | 0            | 0            |
|        |         | Malanil                    | D1H6      | Pf       | 22650                      | 52                   | 35                    | 11                    | 2                     | 0                   | 0                    | 0            | 0            |
|        |         | Malanil                    | D1H8      | Pf       | 21435                      | 34                   | 47                    | 14                    | 5                     | 0                   | 0                    | 0            | 0            |
|        |         | Malanil                    | D1H10     | Pf       | 19731                      | 42                   | 36                    | 17                    | 5                     | 0                   | 0                    | 0            | 0            |
|        |         | Malanil                    | D1H11     | Pf       | 17466                      | 35                   | 37                    | 18                    | 10                    | 0                   | 0                    | 0            | 0            |
|        |         | Malanil                    | D1H17     | Pf       | 17092                      | 5                    | 25                    | 29                    | 36                    | 5                   | 0                    | 0            | 0            |
|        |         | Malanil                    | D1H23     | Pf       | 16324                      | 0                    | 11                    | 12                    | 60                    | 12                  | 5                    | 0            | 0            |
|        |         | Malanil                    | D1H29     | Pf       | 10946                      | 0                    | 4                     | 12                    | 55                    | 23                  | 6                    | 0            | 0            |
|        |         | Malanil                    | D2H35     | Pf       | 9632                       | 0                    | 9                     | 11                    | 54                    | 15                  | 11                   | 0            | 0            |
|        |         | Malanil                    | D2H41     | Pf       | 4493                       | ND                   | ND                    | ND                    | ND                    | ND                  | ND                   | ND           | ND           |
|        |         | Malanil                    | D3H47     | Pf       | 1245                       | ND                   | ND                    | ND                    | ND                    | ND                  | ND                   | ND           | ND           |
|        |         | Malanil                    | D3H53     | Pf       | 599                        | ND                   | ND                    | ND                    | ND                    | ND                  | ND                   | ND           | ND           |
|        |         | Malanil                    | D3H59     | Pf       | 263                        | ND                   | ND                    | ND                    | ND                    | ND                  | ND                   | ND           | ND           |
|        |         | Malanil                    | D3H65     | NEGATIVE | 0                          | ND                   | ND                    | ND                    | ND                    | ND                  | ND                   | ND           | ND           |
|        |         | Malanil                    | D3H71     | NEGATIVE | 0                          | ND                   | ND                    | ND                    | ND                    | ND                  | ND                   | ND           | ND           |
|        |         | Malanil                    | D7        | NEGATIVE | 0                          | ND                   | ND                    | ND                    | ND                    | ND                  | ND                   | ND           | ND           |
|        |         | Malanil                    | D14       | NEGATIVE | 0                          | ND                   | ND                    | ND                    | ND                    | ND                  | ND                   | ND           | ND           |
|        |         | Sevuparin/DF02+<br>Malanil | SCREENING | Pf       | 10679                      | 14                   | 40                    | 39                    | 7                     | 0                   | 0                    | 0            | 0            |
|        |         | Sevuparin/DF02+<br>Malanil | D1H0      | Pf       | 11826                      | 2                    | 36                    | 36                    | 23                    | 2                   | 1                    | 0            | 0            |

## TSM02 Individual subject listings part 2

## CSR Appendix 16.2

| SUBJID | INITIAL | ARM                        | TIMEPOINT | SPECIES | PARASITAEMIA<br>( $\mu$ L) | Tiny<br>Rings<br>(%) | Small<br>Rings<br>(%) | Large<br>Rings<br>(%) | Early<br>Troph<br>(%) | Mid<br>Troph<br>(%) | Late<br>Troph<br>(%) | Gamet<br>(%) | Schiz<br>(%) |
|--------|---------|----------------------------|-----------|---------|----------------------------|----------------------|-----------------------|-----------------------|-----------------------|---------------------|----------------------|--------------|--------------|
|        |         | Sevuparin/DF02+<br>Malanil | D1H1      | Pf      | 10953                      | 30                   | 30                    | 15                    | 18                    | 7                   | 0                    | 0            | 0            |
|        |         | Sevuparin/DF02+<br>Malanil | D1H2      | Pf      | 12899                      | 38                   | 31                    | 16                    | 8                     | 7                   | 0                    | 0            | 0            |
|        |         | Sevuparin/DF02+<br>Malanil | D1H3      | Pf      | 12899                      | 31                   | 40                    | 18                    | 8                     | 3                   | 0                    | 0            | 0            |
|        |         | Sevuparin/DF02+<br>Malanil | D1H4      | Pf      | 13024                      | 26                   | 42                    | 16                    | 14                    | 2                   | 0                    | 0            | 0            |
|        |         | Sevuparin/DF02+<br>Malanil | D1H6      | Pf      | 16517                      | 18                   | 48                    | 20                    | 14                    | 0                   | 0                    | 0            | 0            |
|        |         | Sevuparin/DF02+<br>Malanil | D1H8      | Pf      | 14172                      | 16                   | 40                    | 19                    | 25                    | 0                   | 0                    | 0            | 0            |
|        |         | Sevuparin/DF02+<br>Malanil | D1H10     | Pf      | 15918                      | 22                   | 36                    | 25                    | 17                    | 0                   | 0                    | 0            | 0            |
|        |         | Sevuparin/DF02+<br>Malanil | D1H11     | Pf      | 12550                      | 46                   | 35                    | 12                    | 7                     | 0                   | 0                    | 0            | 0            |
|        |         | Sevuparin/DF02+<br>Malanil | D1H17     | Pf      | 12226                      | 7                    | 24                    | 45                    | 24                    | 0                   | 0                    | 0            | 0            |
|        |         | Sevuparin/DF02+<br>Malanil | D1H23     | Pf      | 8932                       | 3                    | 15                    | 18                    | 55                    | 6                   | 3                    | 0            | 0            |
|        |         | Sevuparin/DF02+<br>Malanil | D1H29     | Pf      | 5083                       | ND                   | ND                    | ND                    | ND                    | ND                  | ND                   | ND           | ND           |
|        |         | Sevuparin/DF02+<br>Malanil | D2H35     | Pf      | 1276                       | ND                   | ND                    | ND                    | ND                    | ND                  | ND                   | ND           | ND           |
|        |         | Sevuparin/DF02+<br>Malanil | D2H41     | Pf      | 203                        | ND                   | ND                    | ND                    | ND                    | ND                  | ND                   | ND           | ND           |
|        |         | Sevuparin/DF02+<br>Malanil | D3H47     | Pf      | 61                         | ND                   | ND                    | ND                    | ND                    | ND                  | ND                   | ND           | ND           |

## TSM02 Individual subject listings part 2

## CSR Appendix 16.2

| SUBJID | INITIAL | ARM                        | TIMEPOINT | SPECIES  | PARASITAEMIA<br>( $\mu$ L) | Tiny<br>Rings<br>(%) | Small<br>Rings<br>(%) | Large<br>Rings<br>(%) | Early<br>Troph<br>(%) | Mid<br>Troph<br>(%) | Late<br>Troph<br>(%) | Gamet<br>(%) | Schiz<br>(%) |
|--------|---------|----------------------------|-----------|----------|----------------------------|----------------------|-----------------------|-----------------------|-----------------------|---------------------|----------------------|--------------|--------------|
|        |         | Malanil                    |           |          |                            |                      |                       |                       |                       |                     |                      |              |              |
|        |         | Sevuparin/DF02+<br>Malanil | D3H53     | Pf       | 48                         | ND                   | ND                    | ND                    | ND                    | ND                  | ND                   | ND           | ND           |
|        |         | Sevuparin/DF02+<br>Malanil | D3H59     | NEGATIVE | 0                          | ND                   | ND                    | ND                    | ND                    | ND                  | ND                   | ND           | ND           |
|        |         | Sevuparin/DF02+<br>Malanil | D3H65     | NEGATIVE | 0                          | ND                   | ND                    | ND                    | ND                    | ND                  | ND                   | ND           | ND           |
|        |         | Sevuparin/DF02+<br>Malanil | D7        | Pf       | 0                          | ND                   | ND                    | ND                    | ND                    | ND                  | ND                   | ND           | ND           |
|        |         | Sevuparin/DF02+<br>Malanil | D14       | NEGATIVE | 0                          | ND                   | ND                    | ND                    | ND                    | ND                  | ND                   | ND           | ND           |
|        |         | Sevuparin/DF02+<br>Malanil | SCREENING | Pf       | 42206                      | 7                    | 53                    | 19                    | 20                    | 1                   | 0                    | 0            | 0            |
|        |         | Sevuparin/DF02+<br>Malanil | D1H0      | Pf       | 33366                      | 4                    | 58                    | 28                    | 10                    | 0                   | 0                    | 0            | 0            |
|        |         | Sevuparin/DF02+<br>Malanil | D1H1      | Pf       | 29590                      | 29                   | 53                    | 11                    | 7                     | 0                   | 0                    | 0            | 0            |
|        |         | Sevuparin/DF02+<br>Malanil | D1H2      | Pf       | 23780                      | 26                   | 49                    | 17                    | 7                     | 1                   | 0                    | 0            | 0            |
|        |         | Sevuparin/DF02+<br>Malanil | D1H3      | Pf       | 23033                      | 59                   | 31                    | 6                     | 4                     | 0                   | 0                    | 0            | 0            |
|        |         | Sevuparin/DF02+<br>Malanil | D1H4      | Pf       | 28573                      | 48                   | 38                    | 4                     | 6                     | 4                   | 0                    | 0            | 0            |
|        |         | Sevuparin/DF02+<br>Malanil | D1H6      | Pf       | 28680                      | 26                   | 46                    | 17                    | 11                    | 0                   | 0                    | 0            | 0            |
|        |         | Sevuparin/DF02+<br>Malanil | D1H8      | Pf       | 23883                      | 21                   | 37                    | 27                    | 15                    | 0                   | 0                    | 0            | 0            |

## TSM02 Individual subject listings part 2

## CSR Appendix 16.2

| SUBJID | INITIAL | ARM                        | TIMEPOINT | SPECIES  | PARASITAEMIA<br>( $\mu$ L) | Tiny<br>Rings<br>(%) | Small<br>Rings<br>(%) | Large<br>Rings<br>(%) | Early<br>Troph<br>(%) | Mid<br>Troph<br>(%) | Late<br>Troph<br>(%) | Gamet<br>(%) | Schiz<br>(%) |
|--------|---------|----------------------------|-----------|----------|----------------------------|----------------------|-----------------------|-----------------------|-----------------------|---------------------|----------------------|--------------|--------------|
|        |         | Sevuparin/DF02+<br>Malanil | D1H10     | Pf       | 24444                      | 9                    | 35                    | 30                    | 26                    | 0                   | 0                    | 0            | 0            |
|        |         | Sevuparin/DF02+<br>Malanil | D1H11     | Pf       | 23448                      | 12                   | 44                    | 19                    | 22                    | 3                   | 0                    | 0            | 0            |
|        |         | Sevuparin/DF02+<br>Malanil | D1H17     | Pf       | 19837                      | 3                    | 10                    | 20                    | 49                    | 17                  | 1                    | 0            | 0            |
|        |         | Sevuparin/DF02+<br>Malanil | D1H23     | Pf       | 17140                      | 0                    | 6                     | 18                    | 58                    | 12                  | 6                    | 0            | 0            |
|        |         | Sevuparin/DF02+<br>Malanil | D1H29     | Pf       | 5850                       | 0                    | 4                     | 8                     | 63                    | 13                  | 12                   | 0            | 0            |
|        |         | Sevuparin/DF02+<br>Malanil | D2H35     | Pf       | 943                        | ND                   | ND                    | ND                    | ND                    | ND                  | ND                   | ND           | ND           |
|        |         | Sevuparin/DF02+<br>Malanil | D2H41     | Pf       | 244                        | ND                   | ND                    | ND                    | ND                    | ND                  | ND                   | ND           | ND           |
|        |         | Sevuparin/DF02+<br>Malanil | D3H47     | Pf       | 114                        | ND                   | ND                    | ND                    | ND                    | ND                  | ND                   | ND           | ND           |
|        |         | Sevuparin/DF02+<br>Malanil | D3H53     | Pf       | 19                         | ND                   | ND                    | ND                    | ND                    | ND                  | ND                   | ND           | ND           |
|        |         | Sevuparin/DF02+<br>Malanil | D3H59     | NEGATIVE | 0                          | ND                   | ND                    | ND                    | ND                    | ND                  | ND                   | ND           | ND           |
|        |         | Sevuparin/DF02+<br>Malanil | D3H65     | NEGATIVE | 0                          | ND                   | ND                    | ND                    | ND                    | ND                  | ND                   | ND           | ND           |
|        |         | Sevuparin/DF02+<br>Malanil | D3H71     | NEGATIVE | 0                          | ND                   | ND                    | ND                    | ND                    | ND                  | ND                   | ND           | ND           |
|        |         | Sevuparin/DF02+<br>Malanil | D7        | NEGATIVE | 0                          | ND                   | ND                    | ND                    | ND                    | ND                  | ND                   | ND           | ND           |
|        |         | Sevuparin/DF02+<br>Malanil | D14       | NEGATIVE | 0                          | ND                   | ND                    | ND                    | ND                    | ND                  | ND                   | ND           | ND           |



## TSM02 Individual subject listings part 2

## CSR Appendix 16.2

| SUBJID | INITIAL | ARM                        | TIMEPOINT | SPECIES | PARASITAEMIA<br>( $\mu$ L) | Tiny<br>Rings<br>(%) | Small<br>Rings<br>(%) | Large<br>Rings<br>(%) | Early<br>Troph<br>(%) | Mid<br>Troph<br>(%) | Late<br>Troph<br>(%) | Gamet<br>(%) | Schiz<br>(%) |
|--------|---------|----------------------------|-----------|---------|----------------------------|----------------------|-----------------------|-----------------------|-----------------------|---------------------|----------------------|--------------|--------------|
|        |         | Malanil                    |           |         |                            |                      |                       |                       |                       |                     |                      |              |              |
|        |         | Sevuparin/DF02+<br>Malanil | SCREENING | Pf      | 68250                      | 64                   | 32                    | 2                     | 2                     | 0                   | 0                    | 0            | 0            |
|        |         | Sevuparin/DF02+<br>Malanil | D1H0      | Pf      | 99750                      | 83                   | 15                    | 0                     | 2                     | 0                   | 0                    | 0            | 0            |
|        |         | Sevuparin/DF02+<br>Malanil | D1H1      | Pf      | 105000                     | 79                   | 17                    | 2                     | 2                     | 0                   | 0                    | 0            | 0            |
|        |         | Sevuparin/DF02+<br>Malanil | D1H2      | Pf      | 94500                      | 67                   | 29                    | 2                     | 2                     | 0                   | 0                    | 0            | 0            |
|        |         | Sevuparin/DF02+<br>Malanil | D1H3      | Pf      | 99750                      | 59                   | 30                    | 9                     | 2                     | 0                   | 0                    | 0            | 0            |
|        |         | Sevuparin/DF02+<br>Malanil | D1H4      | Pf      | 94500                      | 77                   | 15                    | 2                     | 6                     | 0                   | 0                    | 0            | 0            |
|        |         | Sevuparin/DF02+<br>Malanil | D1H6      | Pf      | 94500                      | 76                   | 18                    | 2                     | 4                     | 0                   | 0                    | 0            | 0            |
|        |         | Sevuparin/DF02+<br>Malanil | D1H8      | Pf      | 94500                      | 61                   | 24                    | 2                     | 13                    | 0                   | 0                    | 0            | 0            |
|        |         | Sevuparin/DF02+<br>Malanil | D1H10     | Pf      | 89250                      | 68                   | 23                    | 2                     | 7                     | 0                   | 0                    | 0            | 0            |
|        |         | Sevuparin/DF02+<br>Malanil | D1H11     | Pf      | 89250                      | 54                   | 33                    | 9                     | 4                     | 0                   | 0                    | 0            | 0            |
|        |         | Sevuparin/DF02+<br>Malanil | D1H17     | Pf      | 73500                      | 22                   | 28                    | 19                    | 26                    | 5                   | 0                    | 0            | 0            |
|        |         | Sevuparin/DF02+<br>Malanil | D1H23     | Pf      | 52500                      | 6                    | 18                    | 20                    | 50                    | 6                   | 0                    | 0            | 0            |
|        |         | Sevuparin/DF02+<br>Malanil | D1H29     | Pf      | 15208                      | ND                   | ND                    | ND                    | ND                    | ND                  | ND                   | ND           | ND           |

## TSM02 Individual subject listings part 2

## CSR Appendix 16.2

| SUBJID | INITIAL | ARM                        | TIMEPOINT | SPECIES  | PARASITAEMIA<br>( $\mu$ L) | Tiny<br>Rings<br>(%) | Small<br>Rings<br>(%) | Large<br>Rings<br>(%) | Early<br>Troph<br>(%) | Mid<br>Troph<br>(%) | Late<br>Troph<br>(%) | Gamet<br>(%) | Schiz<br>(%) |
|--------|---------|----------------------------|-----------|----------|----------------------------|----------------------|-----------------------|-----------------------|-----------------------|---------------------|----------------------|--------------|--------------|
|        |         | Sevuparin/DF02+<br>Malanil | D2H35     | Pf       | 3282                       | ND                   | ND                    | ND                    | ND                    | ND                  | ND                   | ND           | ND           |
|        |         | Sevuparin/DF02+<br>Malanil | D2H41     | Pf       | 1780                       | ND                   | ND                    | ND                    | ND                    | ND                  | ND                   | ND           | ND           |
|        |         | Sevuparin/DF02+<br>Malanil | D3H47     | Pf       | 858                        | ND                   | ND                    | ND                    | ND                    | ND                  | ND                   | ND           | ND           |
|        |         | Sevuparin/DF02+<br>Malanil | D3H53     | Pf       | 601                        | ND                   | ND                    | ND                    | ND                    | ND                  | ND                   | ND           | ND           |
|        |         | Sevuparin/DF02+<br>Malanil | D3H59     | Pf       | 65                         | ND                   | ND                    | ND                    | ND                    | ND                  | ND                   | ND           | ND           |
|        |         | Sevuparin/DF02+<br>Malanil | D3H65     | Pf       | 22                         | ND                   | ND                    | ND                    | ND                    | ND                  | ND                   | ND           | ND           |
|        |         | Sevuparin/DF02+<br>Malanil | D3H71     | NEGATIVE | 0                          | ND                   | ND                    | ND                    | ND                    | ND                  | ND                   | ND           | ND           |
|        |         | Sevuparin/DF02+<br>Malanil | D4        | NEGATIVE | 0                          | ND                   | ND                    | ND                    | ND                    | ND                  | ND                   | ND           | ND           |
|        |         | Sevuparin/DF02+<br>Malanil | D7        | NEGATIVE | 0                          | ND                   | ND                    | ND                    | ND                    | ND                  | ND                   | ND           | ND           |
|        |         | Sevuparin/DF02+<br>Malanil | D14       | NEGATIVE | 0                          | ND                   | ND                    | ND                    | ND                    | ND                  | ND                   | ND           | ND           |
|        |         | Malanil                    | SCREENING | Pf       | 37216                      | 26                   | 30                    | 24                    | 19                    | 1                   | 0                    | 0            | 0            |
|        |         | Malanil                    | D1H0      | Pf       | 36089                      | 19                   | 33                    | 28                    | 20                    | 0                   | 0                    | 0            | 0            |
|        |         | Malanil                    | D1H1      | Pf       | 41973                      | 9                    | 39                    | 30                    | 21                    | 1                   | 0                    | 0            | 0            |
|        |         | Malanil                    | D1H2      | Pf       | 31425                      | 19                   | 36                    | 21                    | 23                    | 1                   | 0                    | 0            | 0            |
|        |         | Malanil                    | D1H3      | Pf       | 33428                      | 9                    | 35                    | 24                    | 24                    | 6                   | 2                    | 0            | 0            |
|        |         | Malanil                    | D1H4      | Pf       | 38436                      | 11                   | 31                    | 24                    | 26                    | 7                   | 1                    | 0            | 0            |

## TSM02 Individual subject listings part 2

## CSR Appendix 16.2

| SUBJID | INITIAL | ARM                        | TIMEPOINT | SPECIES  | PARASITAEMIA<br>( $\mu$ L) | Tiny<br>Rings<br>(%) | Small<br>Rings<br>(%) | Large<br>Rings<br>(%) | Early<br>Troph<br>(%) | Mid<br>Troph<br>(%) | Late<br>Troph<br>(%) | Gamet<br>(%) | Schiz<br>(%) |
|--------|---------|----------------------------|-----------|----------|----------------------------|----------------------|-----------------------|-----------------------|-----------------------|---------------------|----------------------|--------------|--------------|
|        |         | Malanil                    | D1H6      | Pf       | 33929                      | 19                   | 33                    | 19                    | 23                    | 5                   | 1                    | 0            | 0            |
|        |         | Malanil                    | D1H8      | Pf       | 28733                      | 9                    | 26                    | 18                    | 30                    | 11                  | 6                    | 0            | 0            |
|        |         | Malanil                    | D1H10     | Pf       | 20408                      | 12                   | 30                    | 17                    | 27                    | 10                  | 4                    | 0            | 0            |
|        |         | Malanil                    | D1H11     | Pf       | 14523                      | 12                   | 23                    | 18                    | 25                    | 13                  | 9                    | 0            | 0            |
|        |         | Malanil                    | D1H17     | Pf       | 4883                       | 17                   | 28                    | 16                    | 21                    | 14                  | 4                    | 0            | 0            |
|        |         | Malanil                    | D1H23     | Pf       | 1967                       | 12                   | 36                    | 12                    | 32                    | 4                   | 4                    | 0            | 0            |
|        |         | Malanil                    | D1H29     | Pf       | 1650                       | ND                   | ND                    | ND                    | ND                    | ND                  | ND                   | ND           | ND           |
|        |         | Malanil                    | D2H35     | Pf       | 698                        | ND                   | ND                    | ND                    | ND                    | ND                  | ND                   | ND           | ND           |
|        |         | Malanil                    | D2H41     | Pf       | 338                        | ND                   | ND                    | ND                    | ND                    | ND                  | ND                   | ND           | ND           |
|        |         | Malanil                    | D3H47     | Pf       | 64                         | ND                   | ND                    | ND                    | ND                    | ND                  | ND                   | ND           | ND           |
|        |         | Malanil                    | D3H53     | Pf       | 21                         | ND                   | ND                    | ND                    | ND                    | ND                  | ND                   | ND           | ND           |
|        |         | Malanil                    | D3H59     | NEGATIVE | 0                          | ND                   | ND                    | ND                    | ND                    | ND                  | ND                   | ND           | ND           |
|        |         | Malanil                    | D3H65     | NEGATIVE | 0                          | ND                   | ND                    | ND                    | ND                    | ND                  | ND                   | ND           | ND           |
|        |         | Malanil                    | D7        | NEGATIVE | 0                          | ND                   | ND                    | ND                    | ND                    | ND                  | ND                   | ND           | ND           |
|        |         | Malanil                    | D14       | NEGATIVE | 0                          | ND                   | ND                    | ND                    | ND                    | ND                  | ND                   | ND           | ND           |
|        |         | Sevuparin/DF02+<br>Malanil | SCREENING | Pf       | 71540                      | 72                   | 26                    | 2                     | 0                     | 0                   | 0                    | 0            | 0            |
|        |         | Sevuparin/DF02+<br>Malanil | D1H0      | Pf       | 91980                      | 72                   | 24                    | 4                     | 0                     | 0                   | 0                    | 0            | 0            |
|        |         | Sevuparin/DF02+<br>Malanil | D1H1      | Pf       | 132860                     | 45                   | 37                    | 12                    | 5                     | 1                   | 0                    | 0            | 0            |
|        |         | Sevuparin/DF02+<br>Malanil | D1H2      | Pf       | 102200                     | 65                   | 27                    | 6                     | 2                     | 0                   | 0                    | 0            | 0            |
|        |         | Sevuparin/DF02+<br>Malanil | D1H3      | Pf       | 76650                      | 61                   | 25                    | 9                     | 5                     | 0                   | 0                    | 0            | 0            |

## TSM02 Individual subject listings part 2

## CSR Appendix 16.2

| SUBJID | INITIAL | ARM                        | TIMEPOINT | SPECIES | PARASITAEMIA<br>( $\mu$ L) | Tiny<br>Rings<br>(%) | Small<br>Rings<br>(%) | Large<br>Rings<br>(%) | Early<br>Troph<br>(%) | Mid<br>Troph<br>(%) | Late<br>Troph<br>(%) | Gamet<br>(%) | Schiz<br>(%) |
|--------|---------|----------------------------|-----------|---------|----------------------------|----------------------|-----------------------|-----------------------|-----------------------|---------------------|----------------------|--------------|--------------|
|        |         | Malanil                    |           |         |                            |                      |                       |                       |                       |                     |                      |              |              |
|        |         | Sevuparin/DF02+<br>Malanil | D1H4      | Pf      | 91980                      | 52                   | 28                    | 13                    | 7                     | 0                   | 0                    | 0            | 0            |
|        |         | Sevuparin/DF02+<br>Malanil | D1H6      | Pf      | 86870                      | 40                   | 44                    | 12                    | 4                     | 0                   | 0                    | 0            | 0            |
|        |         | Sevuparin/DF02+<br>Malanil | D1H8      | Pf      | 71540                      | 26                   | 35                    | 24                    | 15                    | 0                   | 0                    | 0            | 0            |
|        |         | Sevuparin/DF02+<br>Malanil | D1H10     | Pf      | 61320                      | 24                   | 46                    | 16                    | 14                    | 0                   | 0                    | 0            | 0            |
|        |         | Sevuparin/DF02+<br>Malanil | D1H11     | Pf      | 56210                      | 14                   | 53                    | 21                    | 12                    | 0                   | 0                    | 0            | 0            |
|        |         | Sevuparin/DF02+<br>Malanil | D1H17     | Pf      | 27239                      | 4                    | 37                    | 27                    | 32                    | 0                   | 0                    | 0            | 0            |
|        |         | Sevuparin/DF02+<br>Malanil | D1H23     | Pf      | 11554                      | 8                    | 21                    | 33                    | 38                    | 0                   | 0                    | 0            | 0            |
|        |         | Sevuparin/DF02+<br>Malanil | D1H29     | Pf      | 10154                      | 0                    | 15                    | 17                    | 60                    | 8                   | 0                    | 0            | 0            |
|        |         | Sevuparin/DF02+<br>Malanil | D2H35     | Pf      | 2532                       | 4                    | 10                    | 29                    | 43                    | 14                  | 0                    | 0            | 0            |
|        |         | Sevuparin/DF02+<br>Malanil | D2H41     | Pf      | 666                        | ND                   | ND                    | ND                    | ND                    | ND                  | ND                   | ND           | ND           |
|        |         | Sevuparin/DF02+<br>Malanil | D3H47     | Pf      | 133                        | ND                   | ND                    | ND                    | ND                    | ND                  | ND                   | ND           | ND           |
|        |         | Sevuparin/DF02+<br>Malanil | D3H53     | Pf      | 111                        | ND                   | ND                    | ND                    | ND                    | ND                  | ND                   | ND           | ND           |
|        |         | Sevuparin/DF02+<br>Malanil | D3H59     | Pf      | 28                         | ND                   | ND                    | ND                    | ND                    | ND                  | ND                   | ND           | ND           |

## TSM02 Individual subject listings part 2

## CSR Appendix 16.2

| SUBJID | INITIAL | ARM                        | TIMEPOINT | SPECIES  | PARASITAEMIA<br>( $\mu$ L) | Tiny<br>Rings<br>(%) | Small<br>Rings<br>(%) | Large<br>Rings<br>(%) | Early<br>Troph<br>(%) | Mid<br>Troph<br>(%) | Late<br>Troph<br>(%) | Gamet<br>(%) | Schiz<br>(%) |
|--------|---------|----------------------------|-----------|----------|----------------------------|----------------------|-----------------------|-----------------------|-----------------------|---------------------|----------------------|--------------|--------------|
|        |         | Sevuparin/DF02+<br>Malanil | D3H65     | NEGATIVE | 0                          | ND                   | ND                    | ND                    | ND                    | ND                  | ND                   | ND           | ND           |
|        |         | Sevuparin/DF02+<br>Malanil | D3H71     | NEGATIVE | 0                          | ND                   | ND                    | ND                    | ND                    | ND                  | ND                   | ND           | ND           |
|        |         | Sevuparin/DF02+<br>Malanil | D7        | NEGATIVE | 0                          | ND                   | ND                    | ND                    | ND                    | ND                  | ND                   | ND           | ND           |
|        |         | Sevuparin/DF02+<br>Malanil | D14       | NEGATIVE | 0                          | ND                   | ND                    | ND                    | ND                    | ND                  | ND                   | ND           | ND           |
|        |         | Sevuparin/DF02+<br>Malanil | SCREENING | Pf       | 34019                      | 18                   | 20                    | 7                     | 36                    | 11                  | 8                    | 0            | 0            |
|        |         | Sevuparin/DF02+<br>Malanil | D1H0      | Pf       | 17827                      | 20                   | 32                    | 13                    | 16                    | 11                  | 8                    | 0            | 0            |
|        |         | Sevuparin/DF02+<br>Malanil | D1H1      | Pf       | 15280                      | 3                    | 14                    | 14                    | 29                    | 18                  | 22                   | 0            | 0            |
|        |         | Sevuparin/DF02+<br>Malanil | D1H2      | Pf       | 13790                      | 2                    | 17                    | 20                    | 24                    | 19                  | 18                   | 0            | 0            |
|        |         | Sevuparin/DF02+<br>Malanil | D1H3      | Pf       | 12781                      | 8                    | 18                    | 19                    | 26                    | 14                  | 15                   | 0            | 0            |
|        |         | Sevuparin/DF02+<br>Malanil | D1H4      | Pf       | 12733                      | 10                   | 19                    | 11                    | 27                    | 16                  | 17                   | 0            | 0            |
|        |         | Sevuparin/DF02+<br>Malanil | D1H6      | Pf       | 9178                       | 6                    | 21                    | 6                     | 40                    | 12                  | 15                   | 0            | 0            |
|        |         | Sevuparin/DF02+<br>Malanil | D1H8      | Pf       | 5334                       | 10                   | 10                    | 25                    | 40                    | 15                  | 0                    | 0            | 0            |
|        |         | Sevuparin/DF02+<br>Malanil | D1H10     | Pf       | 5189                       | ND                   | ND                    | ND                    | ND                    | ND                  | ND                   | ND           | ND           |
|        |         | Sevuparin/DF02+<br>Malanil | D1H11     | Pf       | 4805                       | ND                   | ND                    | ND                    | ND                    | ND                  | ND                   | ND           | ND           |

## TSM02 Individual subject listings part 2

## CSR Appendix 16.2

| SUBJID | INITIAL | ARM                        | TIMEPOINT | SPECIES  | PARASITAEMIA<br>( $\mu$ L) | Tiny<br>Rings<br>(%) | Small<br>Rings<br>(%) | Large<br>Rings<br>(%) | Early<br>Troph<br>(%) | Mid<br>Troph<br>(%) | Late<br>Troph<br>(%) | Gamet<br>(%) | Schiz<br>(%) |
|--------|---------|----------------------------|-----------|----------|----------------------------|----------------------|-----------------------|-----------------------|-----------------------|---------------------|----------------------|--------------|--------------|
|        |         | Malanil                    |           |          |                            |                      |                       |                       |                       |                     |                      |              |              |
|        |         | Sevuparin/DF02+<br>Malanil | D1H17     | Pf       | 2114                       | ND                   | ND                    | ND                    | ND                    | ND                  | ND                   | ND           | ND           |
|        |         | Sevuparin/DF02+<br>Malanil | D1H23     | Pf       | 1057                       | ND                   | ND                    | ND                    | ND                    | ND                  | ND                   | ND           | ND           |
|        |         | Sevuparin/DF02+<br>Malanil | D1H29     | Pf       | 400                        | ND                   | ND                    | ND                    | ND                    | ND                  | ND                   | ND           | ND           |
|        |         | Sevuparin/DF02+<br>Malanil | D2H35     | Pf       | 86                         | ND                   | ND                    | ND                    | ND                    | ND                  | ND                   | ND           | ND           |
|        |         | Sevuparin/DF02+<br>Malanil | D2H41     | Pf       | 57                         | ND                   | ND                    | ND                    | ND                    | ND                  | ND                   | ND           | ND           |
|        |         | Sevuparin/DF02+<br>Malanil | D3H47     | Pf       | 29                         | ND                   | ND                    | ND                    | ND                    | ND                  | ND                   | ND           | ND           |
|        |         | Sevuparin/DF02+<br>Malanil | D3H53     | NEGATIVE | 0                          | ND                   | ND                    | ND                    | ND                    | ND                  | ND                   | ND           | ND           |
|        |         | Sevuparin/DF02+<br>Malanil | D3H59     | NEGATIVE | 0                          | ND                   | ND                    | ND                    | ND                    | ND                  | ND                   | ND           | ND           |
|        |         | Sevuparin/DF02+<br>Malanil | D3H65     | NEGATIVE | 0                          | ND                   | ND                    | ND                    | ND                    | ND                  | ND                   | ND           | ND           |
|        |         | Sevuparin/DF02+<br>Malanil | D3H71     | NEGATIVE | 0                          | ND                   | ND                    | ND                    | ND                    | ND                  | ND                   | ND           | ND           |
|        |         | Sevuparin/DF02+<br>Malanil | D7        | Pf       | 0                          | ND                   | ND                    | ND                    | ND                    | ND                  | ND                   | ND           | ND           |
|        |         | Sevuparin/DF02+<br>Malanil | D14       | Pf       | 0                          | ND                   | ND                    | ND                    | ND                    | ND                  | ND                   | ND           | ND           |
|        |         | Sevuparin/DF02+<br>Malanil | SCREENING | Pf       | 23629                      | 47                   | 41                    | 9                     | 3                     | 0                   | 0                    | 0            | 0            |

## TSM02 Individual subject listings part 2

## CSR Appendix 16.2

| SUBJID | INITIAL | ARM                        | TIMEPOINT | SPECIES | PARASITAEMIA<br>( $\mu$ L) | Tiny<br>Rings<br>(%) | Small<br>Rings<br>(%) | Large<br>Rings<br>(%) | Early<br>Troph<br>(%) | Mid<br>Troph<br>(%) | Late<br>Troph<br>(%) | Gamet<br>(%) | Schiz<br>(%) |
|--------|---------|----------------------------|-----------|---------|----------------------------|----------------------|-----------------------|-----------------------|-----------------------|---------------------|----------------------|--------------|--------------|
|        |         | Sevuparin/DF02+<br>Malanil | D1H0      | Pf      | 22630                      | 49                   | 31                    | 13                    | 6                     | 1                   | 0                    | 0            | 0            |
|        |         | Sevuparin/DF02+<br>Malanil | D1H1      | Pf      | 23130                      | 45                   | 39                    | 9                     | 7                     | 0                   | 0                    | 0            | 0            |
|        |         | Sevuparin/DF02+<br>Malanil | D1H2      | Pf      | 31158                      | 40                   | 23                    | 21                    | 16                    | 0                   | 0                    | 0            | 0            |
|        |         | Sevuparin/DF02+<br>Malanil | D1H3      | Pf      | 30451                      | 57                   | 32                    | 7                     | 3                     | 1                   | 0                    | 0            | 0            |
|        |         | Sevuparin/DF02+<br>Malanil | D1H4      | Pf      | 30534                      | 31                   | 35                    | 20                    | 13                    | 1                   | 0                    | 0            | 0            |
|        |         | Sevuparin/DF02+<br>Malanil | D1H6      | Pf      | 27498                      | 40                   | 36                    | 21                    | 3                     | 0                   | 0                    | 0            | 0            |
|        |         | Sevuparin/DF02+<br>Malanil | D1H8      | Pf      | 20134                      | 38                   | 32                    | 16                    | 12                    | 2                   | 0                    | 0            | 0            |
|        |         | Sevuparin/DF02+<br>Malanil | D1H10     | Pf      | 19552                      | 17                   | 47                    | 28                    | 8                     | 0                   | 0                    | 0            | 0            |
|        |         | Sevuparin/DF02+<br>Malanil | D1H11     | Pf      | 18179                      | 30                   | 28                    | 23                    | 17                    | 1                   | 1                    | 0            | 0            |
|        |         | Sevuparin/DF02+<br>Malanil | D1H17     | Pf      | 14310                      | 30                   | 13                    | 9                     | 44                    | 4                   | 0                    | 0            | 0            |
|        |         | Sevuparin/DF02+<br>Malanil | D1H23     | Pf      | 5824                       | ND                   | ND                    | ND                    | ND                    | ND                  | ND                   | ND           | ND           |
|        |         | Sevuparin/DF02+<br>Malanil | D1H29     | Pf      | 1155                       | ND                   | ND                    | ND                    | ND                    | ND                  | ND                   | ND           | ND           |
|        |         | Sevuparin/DF02+<br>Malanil | D2H35     | Pf      | 350                        | ND                   | ND                    | ND                    | ND                    | ND                  | ND                   | ND           | ND           |
|        |         | Sevuparin/DF02+<br>Malanil | D2H41     | Pf      | 105                        | ND                   | ND                    | ND                    | ND                    | ND                  | ND                   | ND           | ND           |

## TSM02 Individual subject listings part 2

## CSR Appendix 16.2

| SUBJID | INITIAL | ARM                        | TIMEPOINT | SPECIES  | PARASITAEMIA<br>( $\mu$ L) | Tiny<br>Rings<br>(%) | Small<br>Rings<br>(%) | Large<br>Rings<br>(%) | Early<br>Troph<br>(%) | Mid<br>Troph<br>(%) | Late<br>Troph<br>(%) | Gamet<br>(%) | Schiz<br>(%) |
|--------|---------|----------------------------|-----------|----------|----------------------------|----------------------|-----------------------|-----------------------|-----------------------|---------------------|----------------------|--------------|--------------|
|        |         | Malanil                    |           |          |                            |                      |                       |                       |                       |                     |                      |              |              |
|        |         | Sevuparin/DF02+<br>Malanil | D3H47     | NEGATIVE | 0                          | ND                   | ND                    | ND                    | ND                    | ND                  | ND                   | ND           | ND           |
|        |         | Sevuparin/DF02+<br>Malanil | D3H53     | NEGATIVE | 0                          | ND                   | ND                    | ND                    | ND                    | ND                  | ND                   | ND           | ND           |
|        |         | Sevuparin/DF02+<br>Malanil | D3H59     | NEGATIVE | 0                          | ND                   | ND                    | ND                    | ND                    | ND                  | ND                   | ND           | ND           |
|        |         | Sevuparin/DF02+<br>Malanil | D3H65     | NEGATIVE | 0                          | ND                   | ND                    | ND                    | ND                    | ND                  | ND                   | ND           | ND           |
|        |         | Sevuparin/DF02+<br>Malanil | D7        | NEGATIVE | 0                          | ND                   | ND                    | ND                    | ND                    | ND                  | ND                   | ND           | ND           |
|        |         | Sevuparin/DF02+<br>Malanil | D14       | NEGATIVE | 0                          | ND                   | ND                    | ND                    | ND                    | ND                  | ND                   | ND           | ND           |
|        |         | Sevuparin/DF02+<br>Malanil | SCREENING | Pf       | 22200                      | 6                    | 15                    | 29                    | 28                    | 15                  | 7                    | 0            | 0            |
|        |         | Sevuparin/DF02+<br>Malanil | D1H0      | Pf       | 10212                      | 23                   | 33                    | 10                    | 27                    | 7                   | 0                    | 0            | 0            |
|        |         | Sevuparin/DF02+<br>Malanil | D1H1      | Pf       | 7326                       | 12                   | 17                    | 12                    | 27                    | 12                  | 20                   | 0            | 0            |
|        |         | Sevuparin/DF02+<br>Malanil | D1H2      | Pf       | 5957                       | 6                    | 17                    | 10                    | 30                    | 10                  | 27                   | 0            | 0            |
|        |         | Sevuparin/DF02+<br>Malanil | D1H3      | Pf       | 6327                       | 7                    | 28                    | 30                    | 21                    | 9                   | 5                    | 0            | 0            |
|        |         | Sevuparin/DF02+<br>Malanil | D1H4      | Pf       | 5513                       | 14                   | 27                    | 18                    | 31                    | 2                   | 8                    | 0            | 0            |
|        |         | Sevuparin/DF02+<br>Malanil | D1H6      | Pf       | 4995                       | ND                   | ND                    | ND                    | ND                    | ND                  | ND                   | ND           | ND           |



## TSM02 Individual subject listings part 2

## CSR Appendix 16.2

| SUBJID | INITIAL | ARM                        | TIMEPOINT | SPECIES  | PARASITAEMIA<br>( $\mu$ L) | Tiny<br>Rings<br>(%) | Small<br>Rings<br>(%) | Large<br>Rings<br>(%) | Early<br>Troph<br>(%) | Mid<br>Troph<br>(%) | Late<br>Troph<br>(%) | Gamet<br>(%) | Schiz<br>(%) |
|--------|---------|----------------------------|-----------|----------|----------------------------|----------------------|-----------------------|-----------------------|-----------------------|---------------------|----------------------|--------------|--------------|
|        |         | Sevuparin/DF02+<br>Malanil | D1H8      | Pf       | 3256                       | ND                   | ND                    | ND                    | ND                    | ND                  | ND                   | ND           | ND           |
|        |         | Sevuparin/DF02+<br>Malanil | D1H10     | Pf       | 2701                       | ND                   | ND                    | ND                    | ND                    | ND                  | ND                   | ND           | ND           |
|        |         | Sevuparin/DF02+<br>Malanil | D1H11     | Pf       | 2590                       | ND                   | ND                    | ND                    | ND                    | ND                  | ND                   | ND           | ND           |
|        |         | Sevuparin/DF02+<br>Malanil | D1H17     | Pf       | 1221                       | ND                   | ND                    | ND                    | ND                    | ND                  | ND                   | ND           | ND           |
|        |         | Sevuparin/DF02+<br>Malanil | D1H23     | Pf       | 925                        | ND                   | ND                    | ND                    | ND                    | ND                  | ND                   | ND           | ND           |
|        |         | Sevuparin/DF02+<br>Malanil | D1H29     | Pf       | 210                        | ND                   | ND                    | ND                    | ND                    | ND                  | ND                   | ND           | ND           |
|        |         | Sevuparin/DF02+<br>Malanil | D2H35     | Pf       | 70                         | ND                   | ND                    | ND                    | ND                    | ND                  | ND                   | ND           | ND           |
|        |         | Sevuparin/DF02+<br>Malanil | D2H41     | NEGATIVE | 0                          | ND                   | ND                    | ND                    | ND                    | ND                  | ND                   | ND           | ND           |
|        |         | Sevuparin/DF02+<br>Malanil | D3H47     | NEGATIVE | 0                          | ND                   | ND                    | ND                    | ND                    | ND                  | ND                   | ND           | ND           |
|        |         | Sevuparin/DF02+<br>Malanil | D3H53     | NEGATIVE | 0                          | ND                   | ND                    | ND                    | ND                    | ND                  | ND                   | ND           | ND           |
|        |         | Sevuparin/DF02+<br>Malanil | D3H59     | NEGATIVE | 0                          | ND                   | ND                    | ND                    | ND                    | ND                  | ND                   | ND           | ND           |
|        |         | Sevuparin/DF02+<br>Malanil | D3H65     | NEGATIVE | 0                          | ND                   | ND                    | ND                    | ND                    | ND                  | ND                   | ND           | ND           |
|        |         | Sevuparin/DF02+<br>Malanil | D3H71     | NEGATIVE | 0                          | ND                   | ND                    | ND                    | ND                    | ND                  | ND                   | ND           | ND           |
|        |         | Sevuparin/DF02+<br>Malanil | D7        | NEGATIVE | 0                          | ND                   | ND                    | ND                    | ND                    | ND                  | ND                   | ND           | ND           |

## TSM02 Individual subject listings part 2

## CSR Appendix 16.2

| SUBJID | INITIAL | ARM                        | TIMEPOINT | SPECIES  | PARASITAEMIA<br>( $\mu$ L) | Tiny<br>Rings<br>(%) | Small<br>Rings<br>(%) | Large<br>Rings<br>(%) | Early<br>Troph<br>(%) | Mid<br>Troph<br>(%) | Late<br>Troph<br>(%) | Gamet<br>(%) | Schiz<br>(%) |
|--------|---------|----------------------------|-----------|----------|----------------------------|----------------------|-----------------------|-----------------------|-----------------------|---------------------|----------------------|--------------|--------------|
|        |         | Malanil                    |           |          |                            |                      |                       |                       |                       |                     |                      |              |              |
|        |         | Sevuparin/DF02+<br>Malanil | D14       | NEGATIVE | 0                          | ND                   | ND                    | ND                    | ND                    | ND                  | ND                   | ND           | ND           |
|        |         | Malanil                    | SCREENING | Pf       | 69300                      | 24                   | 32                    | 25                    | 18                    | 1                   | 0                    | 0            | 0            |
|        |         | Malanil                    | D1H0      | Pf       | 69300                      | 36                   | 33                    | 21                    | 10                    | 0                   | 0                    | 0            | 0            |
|        |         | Malanil                    | D1H1      | Pf       | 64680                      | 42                   | 28                    | 19                    | 11                    | 0                   | 0                    | 0            | 0            |
|        |         | Malanil                    | D1H2      | Pf       | 73920                      | 18                   | 33                    | 26                    | 23                    | 0                   | 0                    | 0            | 0            |
|        |         | Malanil                    | D1H3      | Pf       | 78540                      | 33                   | 38                    | 19                    | 10                    | 0                   | 0                    | 0            | 0            |
|        |         | Malanil                    | D1H4      | Pf       | 64680                      | 12                   | 35                    | 20                    | 27                    | 6                   | 0                    | 0            | 0            |
|        |         | Malanil                    | D1H6      | Pf       | 60060                      | 16                   | 31                    | 15                    | 30                    | 8                   | 0                    | 0            | 0            |
|        |         | Malanil                    | D1H8      | Pf       | 50820                      | 13                   | 32                    | 20                    | 28                    | 7                   | 0                    | 0            | 0            |
|        |         | Malanil                    | D1H10     | Pf       | 41580                      | 11                   | 32                    | 34                    | 21                    | 2                   | 0                    | 0            | 0            |
|        |         | Malanil                    | D1H11     | Pf       | 30845                      | 4                    | 25                    | 30                    | 36                    | 5                   | 0                    | 0            | 0            |
|        |         | Malanil                    | D1H17     | Pf       | 14851                      | 7                    | 16                    | 32                    | 45                    | 0                   | 0                    | 0            | 0            |
|        |         | Malanil                    | D1H23     | Pf       | 8472                       | 10                   | 12                    | 30                    | 42                    | 6                   | 0                    | 0            | 0            |
|        |         | Malanil                    | D1H29     | Pf       | 2472                       | 0                    | 11                    | 22                    | 33                    | 30                  | 4                    | 0            | 0            |
|        |         | Malanil                    | D2H35     | Pf       | 603                        | ND                   | ND                    | ND                    | ND                    | ND                  | ND                   | ND           | ND           |
|        |         | Malanil                    | D2H41     | Pf       | 181                        | ND                   | ND                    | ND                    | ND                    | ND                  | ND                   | ND           | ND           |
|        |         | Malanil                    | D3H47     | NEGATIVE | 0                          | ND                   | ND                    | ND                    | ND                    | ND                  | ND                   | ND           | ND           |
|        |         | Malanil                    | D3H53     | NEGATIVE | 0                          | ND                   | ND                    | ND                    | ND                    | ND                  | ND                   | ND           | ND           |
|        |         | Malanil                    | D3H59     | NEGATIVE | 0                          | ND                   | ND                    | ND                    | ND                    | ND                  | ND                   | ND           | ND           |
|        |         | Malanil                    | D3H65     | NEGATIVE | 0                          | ND                   | ND                    | ND                    | ND                    | ND                  | ND                   | ND           | ND           |
|        |         | Malanil                    | D3H71     | NEGATIVE | 0                          | ND                   | ND                    | ND                    | ND                    | ND                  | ND                   | ND           | ND           |

## TSM02 Individual subject listings part 2

## CSR Appendix 16.2

| SUBJID | INITIAL | ARM     | TIMEPOINT | SPECIES  | PARASITAEMIA<br>( $\mu$ L) | Tiny<br>Rings<br>(%) | Small<br>Rings<br>(%) | Large<br>Rings<br>(%) | Early<br>Troph<br>(%) | Mid<br>Troph<br>(%) | Late<br>Troph<br>(%) | Gamet<br>(%) | Schiz<br>(%) |
|--------|---------|---------|-----------|----------|----------------------------|----------------------|-----------------------|-----------------------|-----------------------|---------------------|----------------------|--------------|--------------|
|        |         | Malanil | D7        | NEGATIVE | 0                          | ND                   | ND                    | ND                    | ND                    | ND                  | ND                   | ND           | ND           |
|        |         | Malanil | D14       | NEGATIVE | 0                          | ND                   | ND                    | ND                    | ND                    | ND                  | ND                   | ND           | ND           |
|        |         | Malanil | SCREENING | Pf       | 96200                      | 0                    | 0                     | 4                     | 95                    | 1                   | 0                    | 0            | 0            |
|        |         | Malanil | D1H0      | Pf       | 96200                      | 0                    | 1                     | 4                     | 80                    | 15                  | 0                    | 0            | 0            |
|        |         | Malanil | D1H1      | Pf       | 91390                      | 0                    | 2                     | 1                     | 63                    | 33                  | 1                    | 0            | 0            |
|        |         | Malanil | D1H2      | Pf       | 86580                      | 3                    | 7                     | 1                     | 39                    | 41                  | 9                    | 0            | 0            |
|        |         | Malanil | D1H3      | Pf       | 62530                      | 5                    | 8                     | 3                     | 24                    | 45                  | 15                   | 0            | 0            |
|        |         | Malanil | D1H4      | Pf       | 11932                      | 13                   | 13                    | 2                     | 20                    | 34                  | 18                   | 0            | 0            |
|        |         | Malanil | D1H6      | Pf       | 4563                       | 22                   | 29                    | 17                    | 20                    | 11                  | 0                    | 1            | 0            |
|        |         | Malanil | D1H8      | Pf       | 3904                       | 21                   | 25                    | 17                    | 19                    | 11                  | 7                    | 0            | 0            |
|        |         | Malanil | D1H10     | Pf       | 2733                       | 40                   | 29                    | 11                    | 8                     | 6                   | 6                    | 0            | 0            |
|        |         | Malanil | D1H11     | Pf       | 2318                       | 37                   | 27                    | 27                    | 7                     | 0                   | 2                    | 0            | 0            |
|        |         | Malanil | D1H17     | Pf       | 2050                       | 18                   | 41                    | 23                    | 18                    | 0                   | 0                    | 0            | 0            |
|        |         | Malanil | D1H23     | Pf       | 1996                       | 0                    | 12                    | 0                     | 18                    | 70                  | 0                    | 0            | 0            |
|        |         | Malanil | D1H29     | Pf       | 1971                       | 15                   | 15                    | 8                     | 46                    | 8                   | 8                    | 0            | 0            |
|        |         | Malanil | D2H35     | Pf       | 1322                       | ND                   | ND                    | ND                    | ND                    | ND                  | ND                   | ND           | ND           |
|        |         | Malanil | D2H41     | Pf       | 175                        | ND                   | ND                    | ND                    | ND                    | ND                  | ND                   | ND           | ND           |
|        |         | Malanil | D3H47     | Pf       | 50                         | ND                   | ND                    | ND                    | ND                    | ND                  | ND                   | ND           | ND           |
|        |         | Malanil | D3H53     | NEGATIVE | 0                          | ND                   | ND                    | ND                    | ND                    | ND                  | ND                   | ND           | ND           |
|        |         | Malanil | D3H59     | NEGATIVE | 0                          | ND                   | ND                    | ND                    | ND                    | ND                  | ND                   | ND           | ND           |
|        |         | Malanil | D3H65     | NEGATIVE | 0                          | ND                   | ND                    | ND                    | ND                    | ND                  | ND                   | ND           | ND           |
|        |         | Malanil | D3H71     | NEGATIVE | 0                          | ND                   | ND                    | ND                    | ND                    | ND                  | ND                   | ND           | ND           |

## TSM02 Individual subject listings part 2

## CSR Appendix 16.2

| SUBJID | INITIAL | ARM     | TIMEPOINT | SPECIES  | PARASITAEMIA<br>( $\mu$ L) | Tiny<br>Rings<br>(%) | Small<br>Rings<br>(%) | Large<br>Rings<br>(%) | Early<br>Troph<br>(%) | Mid<br>Troph<br>(%) | Late<br>Troph<br>(%) | Gamet<br>(%) | Schiz<br>(%) |
|--------|---------|---------|-----------|----------|----------------------------|----------------------|-----------------------|-----------------------|-----------------------|---------------------|----------------------|--------------|--------------|
|        |         | Malanil | D7        | NEGATIVE | 0                          | ND                   | ND                    | ND                    | ND                    | ND                  | ND                   | ND           | ND           |
|        |         | Malanil | D14       | NEGATIVE | 0                          | ND                   | ND                    | ND                    | ND                    | ND                  | ND                   | ND           | ND           |
|        |         | Malanil | SCREENING | Pf       | 17913                      | 47                   | 36                    | 7                     | 7                     | 3                   | 0                    | 0            | 0            |
|        |         | Malanil | D1H0      | Pf       | 20458                      | 77                   | 18                    | 2                     | 2                     | 1                   | 0                    | 0            | 0            |
|        |         | Malanil | D1H1      | Pf       | 22408                      | 77                   | 18                    | 3                     | 2                     | 0                   | 0                    | 0            | 0            |
|        |         | Malanil | D1H2      | Pf       | 22011                      | 64                   | 31                    | 4                     | 0                     | 1                   | 0                    | 0            | 0            |
|        |         | Malanil | D1H3      | Pf       | 22805                      | 44                   | 39                    | 15                    | 2                     | 0                   | 0                    | 0            | 0            |
|        |         | Malanil | D1H4      | Pf       | 25944                      | 43                   | 35                    | 16                    | 6                     | 0                   | 0                    | 0            | 0            |
|        |         | Malanil | D1H6      | Pf       | 19400                      | 49                   | 34                    | 11                    | 6                     | 0                   | 0                    | 0            | 0            |
|        |         | Malanil | D1H8      | Pf       | 19632                      | 35                   | 50                    | 10                    | 5                     | 0                   | 0                    | 0            | 0            |
|        |         | Malanil | D1H10     | Pf       | 17517                      | 29                   | 54                    | 13                    | 3                     | 1                   | 0                    | 0            | 0            |
|        |         | Malanil | D1H11     | Pf       | 20921                      | 22                   | 39                    | 23                    | 15                    | 1                   | 0                    | 0            | 0            |
|        |         | Malanil | D1H17     | Pf       | 22639                      | 13                   | 24                    | 38                    | 25                    | 0                   | 0                    | 0            | 0            |
|        |         | Malanil | D1H23     | Pf       | 8780                       | 0                    | 4                     | 35                    | 59                    | 2                   | 0                    | 0            | 0            |
|        |         | Malanil | D1H29     | Pf       | 8736                       | 0                    | 14                    | 15                    | 57                    | 14                  | 0                    | 0            | 0            |
|        |         | Malanil | D2H35     | Pf       | 5992                       | ND                   | ND                    | ND                    | ND                    | ND                  | ND                   | ND           | ND           |
|        |         | Malanil | D2H41     | Pf       | 3578                       | ND                   | ND                    | ND                    | ND                    | ND                  | ND                   | ND           | ND           |
|        |         | Malanil | D3H47     | Pf       | 758                        | ND                   | ND                    | ND                    | ND                    | ND                  | ND                   | ND           | ND           |
|        |         | Malanil | D3H53     | Pf       | 308                        | ND                   | ND                    | ND                    | ND                    | ND                  | ND                   | ND           | ND           |
|        |         | Malanil | D3H59     | Pf       | 71                         | ND                   | ND                    | ND                    | ND                    | ND                  | ND                   | ND           | ND           |
|        |         | Malanil | D3H65     | NEGATIVE | 0                          | ND                   | ND                    | ND                    | ND                    | ND                  | ND                   | ND           | ND           |
|        |         | Malanil | D3H71     | NEGATIVE | 0                          | ND                   | ND                    | ND                    | ND                    | ND                  | ND                   | ND           | ND           |

## TSM02 Individual subject listings part 2

## CSR Appendix 16.2

| SUBJID | INITIAL | ARM                        | TIMEPOINT | SPECIES  | PARASITAEMIA<br>( $\mu$ L) | Tiny<br>Rings<br>(%) | Small<br>Rings<br>(%) | Large<br>Rings<br>(%) | Early<br>Troph<br>(%) | Mid<br>Troph<br>(%) | Late<br>Troph<br>(%) | Gamet<br>(%) | Schiz<br>(%) |
|--------|---------|----------------------------|-----------|----------|----------------------------|----------------------|-----------------------|-----------------------|-----------------------|---------------------|----------------------|--------------|--------------|
|        |         | Malanil                    | D7        | NEGATIVE | 0                          | ND                   | ND                    | ND                    | ND                    | ND                  | ND                   | ND           | ND           |
|        |         | Malanil                    | D14       | NEGATIVE | 0                          | ND                   | ND                    | ND                    | ND                    | ND                  | ND                   | ND           | ND           |
|        |         | Sevuparin/DF02+<br>Malanil | SCREENING | Pf       | 13431                      | 21                   | 25                    | 19                    | 28                    | 5                   | 1                    | 1            | 0            |
|        |         | Sevuparin/DF02+<br>Malanil | D1H0      | Pf       | 7407                       | 41                   | 24                    | 16                    | 15                    | 1                   | 1                    | 2            | 0            |
|        |         | Sevuparin/DF02+<br>Malanil | D1H1      | Pf       | 12678                      | 19                   | 30                    | 17                    | 25                    | 8                   | 1                    | 0            | 0            |
|        |         | Sevuparin/DF02+<br>Malanil | D1H2      | Pf       | 13777                      | 28                   | 25                    | 15                    | 21                    | 5                   | 3                    | 3            | 0            |
|        |         | Sevuparin/DF02+<br>Malanil | D1H3      | Pf       | 15507                      | 18                   | 26                    | 20                    | 24                    | 8                   | 2                    | 2            | 0            |
|        |         | Sevuparin/DF02+<br>Malanil | D1H4      | Pf       | 17298                      | 12                   | 22                    | 17                    | 35                    | 8                   | 6                    | 0            | 0            |
|        |         | Sevuparin/DF02+<br>Malanil | D1H6      | Pf       | 16382                      | 4                    | 28                    | 20                    | 27                    | 15                  | 4                    | 2            | 0            |
|        |         | Sevuparin/DF02+<br>Malanil | D1H8      | Pf       | 13431                      | 11                   | 22                    | 20                    | 30                    | 5                   | 10                   | 2            | 0            |
|        |         | Sevuparin/DF02+<br>Malanil | D1H10     | Pf       | 12373                      | 3                    | 21                    | 15                    | 35                    | 13                  | 10                   | 3            | 0            |
|        |         | Sevuparin/DF02+<br>Malanil | D1H11     | Pf       | 11966                      | 0                    | 6                     | 20                    | 46                    | 19                  | 6                    | 2            | 1            |
|        |         | Sevuparin/DF02+<br>Malanil | D1H17     | Pf       | 10094                      | 0                    | 7                     | 7                     | 49                    | 17                  | 17                   | 3            | 0            |
|        |         | Sevuparin/DF02+<br>Malanil | D1H23     | Pf       | 7977                       | 4                    | 8                     | 3                     | 34                    | 31                  | 10                   | 10           | 0            |

## TSM02 Individual subject listings part 2

## CSR Appendix 16.2

| SUBJID | INITIAL | ARM                        | TIMEPOINT | SPECIES | PARASITAEMIA<br>( $\mu$ L) | Tiny<br>Rings<br>(%) | Small<br>Rings<br>(%) | Large<br>Rings<br>(%) | Early<br>Troph<br>(%) | Mid<br>Troph<br>(%) | Late<br>Troph<br>(%) | Gamet<br>(%) | Schiz<br>(%) |
|--------|---------|----------------------------|-----------|---------|----------------------------|----------------------|-----------------------|-----------------------|-----------------------|---------------------|----------------------|--------------|--------------|
|        |         | Sevuparin/DF02+<br>Malanil | D1H29     | Pf      | 2207                       | ND                   | ND                    | ND                    | ND                    | ND                  | ND                   | ND           | ND           |
|        |         | Sevuparin/DF02+<br>Malanil | D2H35     | Pf      | 1095                       | ND                   | ND                    | ND                    | ND                    | ND                  | ND                   | ND           | ND           |
|        |         | Sevuparin/DF02+<br>Malanil | D2H41     | Pf      | 343                        | ND                   | ND                    | ND                    | ND                    | ND                  | ND                   | ND           | ND           |
|        |         | Sevuparin/DF02+<br>Malanil | D3H47     | Pf      | 82                         | ND                   | ND                    | ND                    | ND                    | ND                  | ND                   | ND           | ND           |
|        |         | Sevuparin/DF02+<br>Malanil | D3H53     | Pf      | 0                          | ND                   | ND                    | ND                    | ND                    | ND                  | ND                   | ND           | ND           |
|        |         | Sevuparin/DF02+<br>Malanil | D3H59     | Pf      | 0                          | ND                   | ND                    | ND                    | ND                    | ND                  | ND                   | ND           | ND           |
|        |         | Sevuparin/DF02+<br>Malanil | D3H65     | Pf      | 0                          | ND                   | ND                    | ND                    | ND                    | ND                  | ND                   | ND           | ND           |
|        |         | Sevuparin/DF02+<br>Malanil | D3H71     | Pf      | 0                          | ND                   | ND                    | ND                    | ND                    | ND                  | ND                   | ND           | ND           |
|        |         | Sevuparin/DF02+<br>Malanil | D7        | Pf      | 0                          | ND                   | ND                    | ND                    | ND                    | ND                  | ND                   | ND           | ND           |
|        |         | Sevuparin/DF02+<br>Malanil | D14       | Pf      | 0                          | ND                   | ND                    | ND                    | ND                    | ND                  | ND                   | ND           | ND           |
|        |         | Malanil                    | SCREENING | Pf      | 96600                      | 33                   | 34                    | 19                    | 14                    | 0                   | 0                    | 0            | 0            |
|        |         | Malanil                    | D1H0      | Pf      | 96600                      | 27                   | 36                    | 17                    | 17                    | 3                   | 0                    | 0            | 0            |
|        |         | Malanil                    | D1H1      | Pf      | 106260                     | 27                   | 40                    | 23                    | 10                    | 0                   | 0                    | 0            | 0            |
|        |         | Malanil                    | D1H2      | Pf      | 111090                     | 9                    | 36                    | 30                    | 25                    | 0                   | 0                    | 0            | 0            |
|        |         | Malanil                    | D1H3      | Pf      | 111090                     | 7                    | 46                    | 25                    | 19                    | 3                   | 0                    | 0            | 0            |
|        |         | Malanil                    | D1H4      | Pf      | 106260                     | 18                   | 44                    | 15                    | 22                    | 1                   | 0                    | 0            | 0            |

## TSM02 Individual subject listings part 2

## CSR Appendix 16.2

| SUBJID | INITIAL | ARM     | TIMEPOINT | SPECIES  | PARASITAEMIA<br>( $\mu$ L) | Tiny<br>Rings<br>(%) | Small<br>Rings<br>(%) | Large<br>Rings<br>(%) | Early<br>Troph<br>(%) | Mid<br>Troph<br>(%) | Late<br>Troph<br>(%) | Gamet<br>(%) | Schiz<br>(%) |
|--------|---------|---------|-----------|----------|----------------------------|----------------------|-----------------------|-----------------------|-----------------------|---------------------|----------------------|--------------|--------------|
|        |         | Malanil | D1H6      | Pf       | 106260                     | 14                   | 39                    | 15                    | 30                    | 2                   | 0                    | 0            | 0            |
|        |         | Malanil | D1H8      | Pf       | 96600                      | 3                    | 30                    | 20                    | 41                    | 4                   | 2                    | 0            | 0            |
|        |         | Malanil | D1H10     | Pf       | 82110                      | 5                    | 35                    | 15                    | 36                    | 7                   | 2                    | 0            | 0            |
|        |         | Malanil | D1H11     | Pf       | 77280                      | 3                    | 33                    | 18                    | 32                    | 12                  | 2                    | 0            | 0            |
|        |         | Malanil | D1H17     | Pf       | 67620                      | 1                    | 18                    | 25                    | 41                    | 11                  | 4                    | 0            | 0            |
|        |         | Malanil | D1H23     | Pf       | 60000                      | 3                    | 13                    | 18                    | 41                    | 13                  | 12                   | 0            | 0            |
|        |         | Malanil | D1H29     | Pf       | 50000                      | 0                    | 21                    | 17                    | 38                    | 15                  | 9                    | 0            | 0            |
|        |         | Malanil | D2H35     | Pf       | 15369                      | 3                    | 20                    | 31                    | 31                    | 6                   | 9                    | 0            | 0            |
|        |         | Malanil | D2H41     | Pf       | 8162                       | ND                   | ND                    | ND                    | ND                    | ND                  | ND                   | ND           | ND           |
|        |         | Malanil | D3H47     | Pf       | 2767                       | ND                   | ND                    | ND                    | ND                    | ND                  | ND                   | ND           | ND           |
|        |         | Malanil | D3H53     | Pf       | 2172                       | ND                   | ND                    | ND                    | ND                    | ND                  | ND                   | ND           | ND           |
|        |         | Malanil | D3H59     | Pf       | 1577                       | ND                   | ND                    | ND                    | ND                    | ND                  | ND                   | ND           | ND           |
|        |         | Malanil | D3H65     | Pf       | 446                        | ND                   | ND                    | ND                    | ND                    | ND                  | ND                   | ND           | ND           |
|        |         | Malanil | D3H71     | Pf       | 179                        | ND                   | ND                    | ND                    | ND                    | ND                  | ND                   | ND           | ND           |
|        |         | Malanil | D4        | Pf       | 30                         | ND                   | ND                    | ND                    | ND                    | ND                  | ND                   | ND           | ND           |
|        |         | Malanil | D5        | NEGATIVE | 0                          | ND                   | ND                    | ND                    | ND                    | ND                  | ND                   | ND           | ND           |
|        |         | Malanil | D6        | NEGATIVE | 0                          | ND                   | ND                    | ND                    | ND                    | ND                  | ND                   | ND           | ND           |
|        |         | Malanil | D7        | NEGATIVE | 0                          | ND                   | ND                    | ND                    | ND                    | ND                  | ND                   | ND           | ND           |
|        |         | Malanil | D14       | NEGATIVE | 0                          | ND                   | ND                    | ND                    | ND                    | ND                  | ND                   | ND           | ND           |
|        |         | Malanil | SCREENING | Pf       | 10709                      | 4                    | 11                    | 6                     | 43                    | 26                  | 10                   | 0            | 0            |
|        |         | Malanil | D1H0      | Pf       | 7381                       | 6                    | 13                    | 5                     | 37                    | 26                  | 13                   | 0            | 0            |
|        |         | Malanil | D1H1      | Pf       | 3812                       | 4                    | 12                    | 2                     | 46                    | 22                  | 14                   | 0            | 0            |

## TSM02 Individual subject listings part 2

## CSR Appendix 16.2

| SUBJID | INITIAL | ARM     | TIMEPOINT | SPECIES  | PARASITAEMIA<br>( $\mu$ L) | Tiny<br>Rings<br>(%) | Small<br>Rings<br>(%) | Large<br>Rings<br>(%) | Early<br>Troph<br>(%) | Mid<br>Troph<br>(%) | Late<br>Troph<br>(%) | Gamet<br>(%) | Schiz<br>(%) |
|--------|---------|---------|-----------|----------|----------------------------|----------------------|-----------------------|-----------------------|-----------------------|---------------------|----------------------|--------------|--------------|
|        |         | Malanil | D1H2      | Pf       | 2148                       | ND                   | ND                    | ND                    | ND                    | ND                  | ND                   | ND           | ND           |
|        |         | Malanil | D1H3      | Pf       | 1664                       | ND                   | ND                    | ND                    | ND                    | ND                  | ND                   | ND           | ND           |
|        |         | Malanil | D1H4      | Pf       | 1240                       | ND                   | ND                    | ND                    | ND                    | ND                  | ND                   | ND           | ND           |
|        |         | Malanil | D1H6      | Pf       | 908                        | ND                   | ND                    | ND                    | ND                    | ND                  | ND                   | ND           | ND           |
|        |         | Malanil | D1H8      | Pf       | 666                        | ND                   | ND                    | ND                    | ND                    | ND                  | ND                   | ND           | ND           |
|        |         | Malanil | D1H10     | Pf       | 424                        | ND                   | ND                    | ND                    | ND                    | ND                  | ND                   | ND           | ND           |
|        |         | Malanil | D1H11     | Pf       | 272                        | ND                   | ND                    | ND                    | ND                    | ND                  | ND                   | ND           | ND           |
|        |         | Malanil | D1H17     | Pf       | 121                        | ND                   | ND                    | ND                    | ND                    | ND                  | ND                   | ND           | ND           |
|        |         | Malanil | D1H23     | Pf       | 51                         | ND                   | ND                    | ND                    | ND                    | ND                  | ND                   | ND           | ND           |
|        |         | Malanil | D1H29     | Pf       | 34                         | ND                   | ND                    | ND                    | ND                    | ND                  | ND                   | ND           | ND           |
|        |         | Malanil | D2H35     | Pf       | 17                         | ND                   | ND                    | ND                    | ND                    | ND                  | ND                   | ND           | ND           |
|        |         | Malanil | D2H41     | Pf       | 17                         | ND                   | ND                    | ND                    | ND                    | ND                  | ND                   | ND           | ND           |
|        |         | Malanil | D3H47     | NEGATIVE | 0                          | ND                   | ND                    | ND                    | ND                    | ND                  | ND                   | ND           | ND           |
|        |         | Malanil | D3H53     | NEGATIVE | 0                          | ND                   | ND                    | ND                    | ND                    | ND                  | ND                   | ND           | ND           |
|        |         | Malanil | D7        | NEGATIVE | 0                          | ND                   | ND                    | ND                    | ND                    | ND                  | ND                   | ND           | ND           |
|        |         | Malanil | D14       | NEGATIVE | 0                          | ND                   | ND                    | ND                    | ND                    | ND                  | ND                   | ND           | ND           |
|        |         | Malanil | SCREENING | Pf       | 10108                      | 0                    | 1                     | 14                    | 42                    | 18                  | 25                   | 0            | 0            |
|        |         | Malanil | D1H0      | Pf       | 10840                      | 0                    | 1                     | 0                     | 16                    | 34                  | 49                   | 0            | 0            |
|        |         | Malanil | D1H1      | Pf       | 9476                       | 0                    | 3                     | 4                     | 12                    | 30                  | 51                   | 0            | 0            |
|        |         | Malanil | D1H2      | Pf       | 5985                       | 6                    | 17                    | 6                     | 7                     | 20                  | 44                   | 0            | 0            |
|        |         | Malanil | D1H3      | Pf       | 4954                       | 25                   | 19                    | 9                     | 6                     | 16                  | 25                   | 0            | 0            |
|        |         | Malanil | D1H4      | Pf       | 4489                       | 45                   | 39                    | 0                     | 3                     | 7                   | 6                    | 0            | 0            |



## TSM02 Individual subject listings part 2

## CSR Appendix 16.2

| SUBJID | INITIAL | ARM     | TIMEPOINT | SPECIES  | PARASITAEMIA<br>( $\mu$ L) | Tiny<br>Rings<br>(%) | Small<br>Rings<br>(%) | Large<br>Rings<br>(%) | Early<br>Troph<br>(%) | Mid<br>Troph<br>(%) | Late<br>Troph<br>(%) | Gamet<br>(%) | Schiz<br>(%) |
|--------|---------|---------|-----------|----------|----------------------------|----------------------|-----------------------|-----------------------|-----------------------|---------------------|----------------------|--------------|--------------|
|        |         | Malanil | D1H6      | Pf       | 4921                       | 63                   | 29                    | 3                     | 0                     | 5                   | 0                    | 0            | 0            |
|        |         | Malanil | D1H8      | Pf       | 5586                       | 48                   | 44                    | 8                     | 0                     | 0                   | 0                    | 0            | 0            |
|        |         | Malanil | D1H10     | Pf       | 5353                       | 30                   | 50                    | 10                    | 10                    | 0                   | 0                    | 0            | 0            |
|        |         | Malanil | D1H11     | Pf       | 3325                       | ND                   | ND                    | ND                    | ND                    | ND                  | ND                   | ND           | ND           |
|        |         | Malanil | D1H17     | Pf       | 2627                       | ND                   | ND                    | ND                    | ND                    | ND                  | ND                   | ND           | ND           |
|        |         | Malanil | D1H23     | Pf       | 1136                       | ND                   | ND                    | ND                    | ND                    | ND                  | ND                   | ND           | ND           |
|        |         | Malanil | D1H29     | Pf       | 814                        | ND                   | ND                    | ND                    | ND                    | ND                  | ND                   | ND           | ND           |
|        |         | Malanil | D2H35     | Pf       | 476                        | ND                   | ND                    | ND                    | ND                    | ND                  | ND                   | ND           | ND           |
|        |         | Malanil | D2H41     | Pf       | 230                        | ND                   | ND                    | ND                    | ND                    | ND                  | ND                   | ND           | ND           |
|        |         | Malanil | D3H47     | Pf       | 19                         | ND                   | ND                    | ND                    | ND                    | ND                  | ND                   | ND           | ND           |
|        |         | Malanil | D3H53     | NEGATIVE | 0                          | ND                   | ND                    | ND                    | ND                    | ND                  | ND                   | ND           | ND           |
|        |         | Malanil | D3H59     | NEGATIVE | 0                          | ND                   | ND                    | ND                    | ND                    | ND                  | ND                   | ND           | ND           |
|        |         | Malanil | D7        | NEGATIVE | 0                          | ND                   | ND                    | ND                    | ND                    | ND                  | ND                   | ND           | ND           |
|        |         | Malanil | D14       | NEGATIVE | 0                          | ND                   | ND                    | ND                    | ND                    | ND                  | ND                   | ND           | ND           |
|        |         | Malanil | SCREENING | Pf       | 29388                      | 71                   | 26                    | 1                     | 1                     | 1                   | 0                    | 0            | 0            |
|        |         | Malanil | D1H0      | Pf       | 40409                      | 56                   | 33                    | 9                     | 1                     | 1                   | 0                    | 0            | 0            |
|        |         | Malanil | D1H1      | Pf       | 49895                      | 61                   | 35                    | 3                     | 1                     | 0                   | 0                    | 0            | 0            |
|        |         | Malanil | D1H2      | Pf       | 47849                      | 61                   | 29                    | 9                     | 1                     | 0                   | 0                    | 0            | 0            |
|        |         | Malanil | D1H3      | Pf       | 43106                      | 53                   | 43                    | 4                     | 0                     | 0                   | 0                    | 0            | 0            |
|        |         | Malanil | D1H4      | Pf       | 41618                      | 60                   | 27                    | 10                    | 3                     | 0                   | 0                    | 0            | 0            |
|        |         | Malanil | D1H6      | Pf       | 30039                      | 27                   | 40                    | 26                    | 7                     | 0                   | 0                    | 0            | 0            |
|        |         | Malanil | D1H8      | Pf       | 29528                      | 12                   | 46                    | 20                    | 22                    | 0                   | 0                    | 0            | 0            |

## TSM02 Individual subject listings part 2

## CSR Appendix 16.2

| SUBJID | INITIAL | ARM                        | TIMEPOINT | SPECIES  | PARASITAEMIA<br>( $\mu$ L) | Tiny<br>Rings<br>(%) | Small<br>Rings<br>(%) | Large<br>Rings<br>(%) | Early<br>Troph<br>(%) | Mid<br>Troph<br>(%) | Late<br>Troph<br>(%) | Gamet<br>(%) | Schiz<br>(%) |
|--------|---------|----------------------------|-----------|----------|----------------------------|----------------------|-----------------------|-----------------------|-----------------------|---------------------|----------------------|--------------|--------------|
|        |         | Malanil                    | D1H10     | Pf       | 23715                      | 4                    | 35                    | 28                    | 31                    | 2                   | 0                    | 0            | 0            |
|        |         | Malanil                    | D1H11     | Pf       | 21437                      | 10                   | 27                    | 20                    | 36                    | 6                   | 1                    | 0            | 0            |
|        |         | Malanil                    | D1H17     | Pf       | 20600                      | 10                   | 24                    | 36                    | 24                    | 6                   | 0                    | 0            | 0            |
|        |         | Malanil                    | D1H23     | Pf       | 5914                       | 3                    | 16                    | 14                    | 40                    | 14                  | 13                   | 0            | 0            |
|        |         | Malanil                    | D1H29     | Pf       | 3149                       | ND                   | ND                    | ND                    | ND                    | ND                  | ND                   | ND           | ND           |
|        |         | Malanil                    | D2H35     | Pf       | 435                        | ND                   | ND                    | ND                    | ND                    | ND                  | ND                   | ND           | ND           |
|        |         | Malanil                    | D2H41     | Pf       | 77                         | ND                   | ND                    | ND                    | ND                    | ND                  | ND                   | ND           | ND           |
|        |         | Malanil                    | D3H47     | Pf       | 54                         | ND                   | ND                    | ND                    | ND                    | ND                  | ND                   | ND           | ND           |
|        |         | Malanil                    | D3H53     | NEGATIVE | 0                          | ND                   | ND                    | ND                    | ND                    | ND                  | ND                   | ND           | ND           |
|        |         | Malanil                    | D3H59     | NEGATIVE | 0                          | ND                   | ND                    | ND                    | ND                    | ND                  | ND                   | ND           | ND           |
|        |         | Malanil                    | D7        | NEGATIVE | 0                          | ND                   | ND                    | ND                    | ND                    | ND                  | ND                   | ND           | ND           |
|        |         | Malanil                    | D14       | NEGATIVE | 0                          | ND                   | ND                    | ND                    | ND                    | ND                  | ND                   | ND           | ND           |
|        |         | Sevuparin/DF02+<br>Malanil | SCREENING | Pf       | 11151                      | 12                   | 37                    | 17                    | 21                    | 10                  | 3                    | 0            | 0            |
|        |         | Sevuparin/DF02+<br>Malanil | D1H0      | Pf       | 12184                      | 6                    | 38                    | 20                    | 24                    | 10                  | 2                    | 0            | 0            |
|        |         | Sevuparin/DF02+<br>Malanil | D1H1      | Pf       | 16638                      | 3                    | 38                    | 16                    | 31                    | 8                   | 4                    | 0            | 0            |
|        |         | Sevuparin/DF02+<br>Malanil | D1H2      | Pf       | 15517                      | 4                    | 40                    | 11                    | 24                    | 16                  | 5                    | 0            | 0            |
|        |         | Sevuparin/DF02+<br>Malanil | D1H3      | Pf       | 13954                      | 3                    | 24                    | 14                    | 47                    | 10                  | 2                    | 0            | 0            |
|        |         | Sevuparin/DF02+<br>Malanil | D1H4      | Pf       | 13747                      | 13                   | 35                    | 23                    | 23                    | 5                   | 1                    | 0            | 0            |

## TSM02 Individual subject listings part 2

## CSR Appendix 16.2

| SUBJID | INITIAL | ARM                        | TIMEPOINT | SPECIES  | PARASITAEMIA<br>( $\mu$ L) | Tiny<br>Rings<br>(%) | Small<br>Rings<br>(%) | Large<br>Rings<br>(%) | Early<br>Troph<br>(%) | Mid<br>Troph<br>(%) | Late<br>Troph<br>(%) | Gamet<br>(%) | Schiz<br>(%) |
|--------|---------|----------------------------|-----------|----------|----------------------------|----------------------|-----------------------|-----------------------|-----------------------|---------------------|----------------------|--------------|--------------|
|        |         | Sevuparin/DF02+<br>Malanil | D1H6      | Pf       | 13629                      | 2                    | 13                    | 9                     | 39                    | 25                  | 12                   | 0            | 0            |
|        |         | Sevuparin/DF02+<br>Malanil | D1H8      | Pf       | 11918                      | 5                    | 21                    | 12                    | 40                    | 17                  | 5                    | 0            | 0            |
|        |         | Sevuparin/DF02+<br>Malanil | D1H10     | Pf       | 11771                      | 6                    | 15                    | 20                    | 37                    | 13                  | 9                    | 0            | 0            |
|        |         | Sevuparin/DF02+<br>Malanil | D1H11     | Pf       | 11535                      | 6                    | 13                    | 9                     | 40                    | 21                  | 11                   | 0            | 0            |
|        |         | Sevuparin/DF02+<br>Malanil | D1H17     | Pf       | 10207                      | 3                    | 9                     | 12                    | 39                    | 20                  | 17                   | 0            | 0            |
|        |         | Sevuparin/DF02+<br>Malanil | D1H23     | Pf       | 7818                       | 0                    | 15                    | 14                    | 36                    | 21                  | 14                   | 0            | 0            |
|        |         | Sevuparin/DF02+<br>Malanil | D1H29     | Pf       | 1993                       | 0                    | 31                    | 6                     | 44                    | 6                   | 13                   | 0            | 0            |
|        |         | Sevuparin/DF02+<br>Malanil | D2H35     | Pf       | 1072                       | ND                   | ND                    | ND                    | ND                    | ND                  | ND                   | ND           | ND           |
|        |         | Sevuparin/DF02+<br>Malanil | D2H41     | Pf       | 244                        | ND                   | ND                    | ND                    | ND                    | ND                  | ND                   | ND           | ND           |
|        |         | Sevuparin/DF02+<br>Malanil | D3H47     | Pf       | 169                        | ND                   | ND                    | ND                    | ND                    | ND                  | ND                   | ND           | ND           |
|        |         | Sevuparin/DF02+<br>Malanil | D3H53     | Pf       | 83                         | ND                   | ND                    | ND                    | ND                    | ND                  | ND                   | ND           | ND           |
|        |         | Sevuparin/DF02+<br>Malanil | D3H59     | Pf       | 41                         | ND                   | ND                    | ND                    | ND                    | ND                  | ND                   | ND           | ND           |
|        |         | Sevuparin/DF02+<br>Malanil | D3H65     | NEGATIVE | 0                          | ND                   | ND                    | ND                    | ND                    | ND                  | ND                   | ND           | ND           |
|        |         | Sevuparin/DF02+<br>Malanil | D3H71     | NEGATIVE | 0                          | ND                   | ND                    | ND                    | ND                    | ND                  | ND                   | ND           | ND           |

## TSM02 Individual subject listings part 2

## CSR Appendix 16.2

| SUBJID | INITIAL | ARM                        | TIMEPOINT | SPECIES  | PARASITAEMIA<br>( $\mu$ L) | Tiny<br>Rings<br>(%) | Small<br>Rings<br>(%) | Large<br>Rings<br>(%) | Early<br>Troph<br>(%) | Mid<br>Troph<br>(%) | Late<br>Troph<br>(%) | Gamet<br>(%) | Schiz<br>(%) |
|--------|---------|----------------------------|-----------|----------|----------------------------|----------------------|-----------------------|-----------------------|-----------------------|---------------------|----------------------|--------------|--------------|
|        |         | Malanil                    |           |          |                            |                      |                       |                       |                       |                     |                      |              |              |
|        |         | Sevuparin/DF02+<br>Malanil | D7        | NEGATIVE | 0                          | ND                   | ND                    | ND                    | ND                    | ND                  | ND                   | ND           | ND           |
|        |         | Sevuparin/DF02+<br>Malanil | D14       | NEGATIVE | 0                          | ND                   | ND                    | ND                    | ND                    | ND                  | ND                   | ND           | ND           |
|        |         | Malanil                    | SCREENING | Pf       | 25275                      | 73                   | 26                    | 1                     | 0                     | 0                   | 0                    | 0            | 0            |
|        |         | Malanil                    | D1H0      | Pf       | 24390                      | 67                   | 29                    | 4                     | 0                     | 0                   | 0                    | 0            | 0            |
|        |         | Malanil                    | D1H1      | Pf       | 27990                      | 71                   | 23                    | 5                     | 1                     | 0                   | 0                    | 0            | 0            |
|        |         | Malanil                    | D1H2      | Pf       | 26235                      | 65                   | 26                    | 8                     | 1                     | 0                   | 0                    | 0            | 0            |
|        |         | Malanil                    | D1H3      | Pf       | 22260                      | 56                   | 30                    | 9                     | 5                     | 0                   | 0                    | 0            | 0            |
|        |         | Malanil                    | D1H4      | Pf       | 21990                      | 46                   | 33                    | 15                    | 6                     | 0                   | 0                    | 0            | 0            |
|        |         | Malanil                    | D1H6      | Pf       | 15660                      | 51                   | 30                    | 15                    | 4                     | 0                   | 0                    | 0            | 0            |
|        |         | Malanil                    | D1H8      | Pf       | 14985                      | 8                    | 24                    | 31                    | 35                    | 2                   | 0                    | 0            | 0            |
|        |         | Malanil                    | D1H10     | Pf       | 13980                      | 19                   | 42                    | 23                    | 16                    | 0                   | 0                    | 0            | 0            |
|        |         | Malanil                    | D1H11     | Pf       | 11595                      | 5                    | 31                    | 30                    | 34                    | 0                   | 0                    | 0            | 0            |
|        |         | Malanil                    | D1H17     | Pf       | 10335                      | 3                    | 21                    | 21                    | 48                    | 7                   | 0                    | 0            | 0            |
|        |         | Malanil                    | D1H23     | Pf       | 11063                      | 0                    | 7                     | 14                    | 51                    | 21                  | 7                    | 0            | 0            |
|        |         | Malanil                    | D1H29     | Pf       | 7659                       | 0                    | 8                     | 12                    | 41                    | 29                  | 10                   | 0            | 0            |
|        |         | Malanil                    | D2H35     | Pf       | 1472                       | ND                   | ND                    | ND                    | ND                    | ND                  | ND                   | ND           | ND           |
|        |         | Malanil                    | D2H41     | Pf       | 345                        | ND                   | ND                    | ND                    | ND                    | ND                  | ND                   | ND           | ND           |
|        |         | Malanil                    | D3H47     | Pf       | 33                         | ND                   | ND                    | ND                    | ND                    | ND                  | ND                   | ND           | ND           |
|        |         | Malanil                    | D3H53     | Pf       | 17                         | ND                   | ND                    | ND                    | ND                    | ND                  | ND                   | ND           | ND           |
|        |         | Malanil                    | D3H59     | NEGATIVE | 0                          | ND                   | ND                    | ND                    | ND                    | ND                  | ND                   | ND           | ND           |

## TSM02 Individual subject listings part 2

## CSR Appendix 16.2

| SUBJID | INITIAL | ARM     | TIMEPOINT | SPECIES  | PARASITAEMIA<br>( $\mu$ L) | Tiny<br>Rings<br>(%) | Small<br>Rings<br>(%) | Large<br>Rings<br>(%) | Early<br>Troph<br>(%) | Mid<br>Troph<br>(%) | Late<br>Troph<br>(%) | Gamet<br>(%) | Schiz<br>(%) |
|--------|---------|---------|-----------|----------|----------------------------|----------------------|-----------------------|-----------------------|-----------------------|---------------------|----------------------|--------------|--------------|
|        |         | Malanil | D3H65     | NEGATIVE | 0                          | ND                   | ND                    | ND                    | ND                    | ND                  | ND                   | ND           | ND           |
|        |         | Malanil | D7        | NEGATIVE | 0                          | ND                   | ND                    | ND                    | ND                    | ND                  | ND                   | ND           | ND           |
|        |         | Malanil | D14       | NEGATIVE | 0                          | ND                   | ND                    | ND                    | ND                    | ND                  | ND                   | ND           | ND           |
|        |         | Malanil | SCREENING | Pf       | 10514                      | ND                   | ND                    | ND                    | ND                    | ND                  | ND                   | ND           | ND           |
|        |         | Malanil | D1H0      | Pf       | 6955                       | 0                    | 0                     | 0                     | 8                     | 31                  | 61                   | 0            | 0            |
|        |         | Malanil | D1H1      | Pf       | 5532                       | 0                    | 0                     | 0                     | 6                     | 37                  | 57                   | 0            | 0            |
|        |         | Malanil | D1H2      | Pf       | 3332                       | 0                    | 2                     | 0                     | 9                     | 31                  | 58                   | 0            | 0            |
|        |         | Malanil | D1H3      | Pf       | 1229                       | ND                   | ND                    | ND                    | ND                    | ND                  | ND                   | ND           | ND           |
|        |         | Malanil | D1H4      | Pf       | 938                        | ND                   | ND                    | ND                    | ND                    | ND                  | ND                   | ND           | ND           |
|        |         | Malanil | D1H6      | Pf       | 226                        | ND                   | ND                    | ND                    | ND                    | ND                  | ND                   | ND           | ND           |
|        |         | Malanil | D1H8      | Pf       | 97                         | ND                   | ND                    | ND                    | ND                    | ND                  | ND                   | ND           | ND           |
|        |         | Malanil | D1H10     | Pf       | 65                         | ND                   | ND                    | ND                    | ND                    | ND                  | ND                   | ND           | ND           |
|        |         | Malanil | D1H11     | Pf       | 32                         | ND                   | ND                    | ND                    | ND                    | ND                  | ND                   | ND           | ND           |
|        |         | Malanil | D1H17     | NEGATIVE | 0                          | ND                   | ND                    | ND                    | ND                    | ND                  | ND                   | ND           | ND           |
|        |         | Malanil | D1H23     | NEGATIVE | 0                          | ND                   | ND                    | ND                    | ND                    | ND                  | ND                   | ND           | ND           |
|        |         | Malanil | D1H29     | NEGATIVE | 0                          | ND                   | ND                    | ND                    | ND                    | ND                  | ND                   | ND           | ND           |
|        |         | Malanil | D2H35     | NEGATIVE | 0                          | ND                   | ND                    | ND                    | ND                    | ND                  | ND                   | ND           | ND           |
|        |         | Malanil | D2H41     | NEGATIVE | 0                          | ND                   | ND                    | ND                    | ND                    | ND                  | ND                   | ND           | ND           |
|        |         | Malanil | D3H47     | NEGATIVE | 0                          | ND                   | ND                    | ND                    | ND                    | ND                  | ND                   | ND           | ND           |
|        |         | Malanil | D7        | NEGATIVE | 0                          | ND                   | ND                    | ND                    | ND                    | ND                  | ND                   | ND           | ND           |
|        |         | Malanil | D14       | NEGATIVE | 0                          | ND                   | ND                    | ND                    | ND                    | ND                  | ND                   | ND           | ND           |
|        |         | Malanil | SCREENING | Pf       | 32019                      | 45                   | 39                    | 10                    | 5                     | 1                   | 0                    | 0            | 0            |

## TSM02 Individual subject listings part 2

## CSR Appendix 16.2

| SUBJID | INITIAL | ARM                        | TIMEPOINT | SPECIES  | PARASITAEMIA<br>( $\mu$ L) | Tiny<br>Rings<br>(%) | Small<br>Rings<br>(%) | Large<br>Rings<br>(%) | Early<br>Troph<br>(%) | Mid<br>Troph<br>(%) | Late<br>Troph<br>(%) | Gamet<br>(%) | Schiz<br>(%) |
|--------|---------|----------------------------|-----------|----------|----------------------------|----------------------|-----------------------|-----------------------|-----------------------|---------------------|----------------------|--------------|--------------|
|        |         | Malanil                    | D1H0      | Pf       | 29910                      | 59                   | 32                    | 5                     | 4                     | 0                   | 0                    | 0            | 0            |
|        |         | Malanil                    | D1H1      | Pf       | 33472                      | 58                   | 27                    | 11                    | 4                     | 0                   | 0                    | 0            | 0            |
|        |         | Malanil                    | D1H2      | Pf       | 31124                      | 47                   | 37                    | 10                    | 5                     | 1                   | 0                    | 0            | 0            |
|        |         | Malanil                    | D1H3      | Pf       | 29651                      | 47                   | 33                    | 13                    | 7                     | 0                   | 0                    | 0            | 0            |
|        |         | Malanil                    | D1H4      | Pf       | 26905                      | 34                   | 40                    | 21                    | 5                     | 0                   | 0                    | 0            | 0            |
|        |         | Malanil                    | D1H6      | Pf       | 26427                      | 13                   | 36                    | 24                    | 25                    | 2                   | 0                    | 0            | 0            |
|        |         | Malanil                    | D1H8      | Pf       | 26069                      | 20                   | 33                    | 18                    | 24                    | 4                   | 1                    | 0            | 0            |
|        |         | Malanil                    | D1H10     | Pf       | 25790                      | 4                    | 20                    | 22                    | 47                    | 7                   | 0                    | 0            | 0            |
|        |         | Malanil                    | D1H11     | Pf       | 25353                      | 6                    | 25                    | 24                    | 38                    | 5                   | 2                    | 0            | 0            |
|        |         | Malanil                    | D1H17     | Pf       | 24477                      | 10                   | 21                    | 19                    | 40                    | 7                   | 3                    | 0            | 0            |
|        |         | Malanil                    | D1H23     | Pf       | 17458                      | 4                    | 9                     | 10                    | 27                    | 31                  | 19                   | 0            | 0            |
|        |         | Malanil                    | D1H29     | Pf       | 7363                       | 0                    | 0                     | 0                     | 48                    | 35                  | 17                   | 0            | 0            |
|        |         | Malanil                    | D2H35     | Pf       | 926                        | ND                   | ND                    | ND                    | ND                    | ND                  | ND                   | ND           | ND           |
|        |         | Malanil                    | D2H41     | Pf       | 204                        | ND                   | ND                    | ND                    | ND                    | ND                  | ND                   | ND           | ND           |
|        |         | Malanil                    | D3H47     | Pf       | 66                         | ND                   | ND                    | ND                    | ND                    | ND                  | ND                   | ND           | ND           |
|        |         | Malanil                    | D3H53     | NEGATIVE | 0                          | ND                   | ND                    | ND                    | ND                    | ND                  | ND                   | ND           | ND           |
|        |         | Malanil                    | D3H59     | NEGATIVE | 0                          | ND                   | ND                    | ND                    | ND                    | ND                  | ND                   | ND           | ND           |
|        |         | Malanil                    | D3H65     | NEGATIVE | 0                          | ND                   | ND                    | ND                    | ND                    | ND                  | ND                   | ND           | ND           |
|        |         | Malanil                    | D7        | Pf       | 0                          | ND                   | ND                    | ND                    | ND                    | ND                  | ND                   | ND           | ND           |
|        |         | Malanil                    | D14       | Pf       | 0                          | ND                   | ND                    | ND                    | ND                    | ND                  | ND                   | ND           | ND           |
|        |         | Sevuparin/DF02+<br>Malanil | SCREENING | Pf       | 14823                      | 55                   | 26                    | 14                    | 5                     | 0                   | 0                    | 0            | 0            |
|        |         | Sevuparin/DF02+            | D1H0      | Pf       | 15972                      | 41                   | 27                    | 24                    | 8                     | 0                   | 0                    | 0            | 0            |

## TSM02 Individual subject listings part 2

## CSR Appendix 16.2

| SUBJID | INITIAL | ARM                        | TIMEPOINT | SPECIES  | PARASITAEMIA<br>( $\mu$ L) | Tiny<br>Rings<br>(%) | Small<br>Rings<br>(%) | Large<br>Rings<br>(%) | Early<br>Troph<br>(%) | Mid<br>Troph<br>(%) | Late<br>Troph<br>(%) | Gamet<br>(%) | Schiz<br>(%) |
|--------|---------|----------------------------|-----------|----------|----------------------------|----------------------|-----------------------|-----------------------|-----------------------|---------------------|----------------------|--------------|--------------|
|        |         | Malanil                    |           |          |                            |                      |                       |                       |                       |                     |                      |              |              |
|        |         | Sevuparin/DF02+<br>Malanil | D1H1      | Pf       | 20661                      | 15                   | 27                    | 20                    | 29                    | 6                   | 3                    | 0            | 0            |
|        |         | Sevuparin/DF02+<br>Malanil | D1H2      | Pf       | 17999                      | 12                   | 27                    | 25                    | 28                    | 6                   | 2                    | 0            | 0            |
|        |         | Sevuparin/DF02+<br>Malanil | D1H3      | Pf       | 18967                      | 7                    | 16                    | 30                    | 39                    | 6                   | 2                    | 0            | 0            |
|        |         | Sevuparin/DF02+<br>Malanil | D1H4      | Pf       | 18906                      | 8                    | 22                    | 23                    | 33                    | 12                  | 2                    | 0            | 0            |
|        |         | Sevuparin/DF02+<br>Malanil | D1H6      | Pf       | 17787                      | 0                    | 16                    | 31                    | 44                    | 6                   | 3                    | 0            | 0            |
|        |         | Sevuparin/DF02+<br>Malanil | D1H8      | Pf       | 15579                      | 0                    | 4                     | 13                    | 45                    | 19                  | 19                   | 0            | 0            |
|        |         | Sevuparin/DF02+<br>Malanil | D1H10     | Pf       | 14339                      | 0                    | 4                     | 3                     | 45                    | 34                  | 14                   | 0            | 0            |
|        |         | Sevuparin/DF02+<br>Malanil | D1H11     | Pf       | 13098                      | 2                    | 0                     | 0                     | 9                     | 32                  | 57                   | 0            | 0            |
|        |         | Sevuparin/DF02+<br>Malanil | D1H17     | Pf       | 12221                      | 1                    | 0                     | 0                     | 9                     | 26                  | 64                   | 0            | 0            |
|        |         | Sevuparin/DF02+<br>Malanil | D1H23     | Pf       | 6534                       | 0                    | 11                    | 0                     | 28                    | 22                  | 39                   | 0            | 0            |
|        |         | Sevuparin/DF02+<br>Malanil | D1H29     | Pf       | 1898                       | ND                   | ND                    | ND                    | ND                    | ND                  | ND                   | ND           | ND           |
|        |         | Sevuparin/DF02+<br>Malanil | D2H35     | Pf       | 146                        | ND                   | ND                    | ND                    | ND                    | ND                  | ND                   | ND           | ND           |
|        |         | Sevuparin/DF02+<br>Malanil | D2H41     | NEGATIVE | 0                          | ND                   | ND                    | ND                    | ND                    | ND                  | ND                   | ND           | ND           |

## TSM02 Individual subject listings part 2

## CSR Appendix 16.2

| SUBJID | INITIAL | ARM                        | TIMEPOINT | SPECIES  | PARASITAEMIA<br>( $\mu$ L) | Tiny<br>Rings<br>(%) | Small<br>Rings<br>(%) | Large<br>Rings<br>(%) | Early<br>Troph<br>(%) | Mid<br>Troph<br>(%) | Late<br>Troph<br>(%) | Gamet<br>(%) | Schiz<br>(%) |
|--------|---------|----------------------------|-----------|----------|----------------------------|----------------------|-----------------------|-----------------------|-----------------------|---------------------|----------------------|--------------|--------------|
|        |         | Sevuparin/DF02+<br>Malanil | D3H47     | NEGATIVE | 0                          | ND                   | ND                    | ND                    | ND                    | ND                  | ND                   | ND           | ND           |
|        |         | Sevuparin/DF02+<br>Malanil | D3H53     | NEGATIVE | 0                          | ND                   | ND                    | ND                    | ND                    | ND                  | ND                   | ND           | ND           |
|        |         | Sevuparin/DF02+<br>Malanil | D7        | Pf       | 0                          | ND                   | ND                    | ND                    | ND                    | ND                  | ND                   | ND           | ND           |
|        |         | Sevuparin/DF02+<br>Malanil | D14       | NEGATIVE | 0                          | ND                   | ND                    | ND                    | ND                    | ND                  | ND                   | ND           | ND           |
|        |         | Sevuparin/DF02+<br>Malanil | SCREENING | Pf       | 11475                      | 0                    | 0                     | 2                     | 54                    | 35                  | 9                    | 0            | 0            |
|        |         | Sevuparin/DF02+<br>Malanil | D1H0      | Pf       | 350                        | 10                   | 10                    | 0                     | 30                    | 40                  | 10                   | 0            | 0            |
|        |         | Sevuparin/DF02+<br>Malanil | D1H1      | Pf       | 375                        | ND                   | ND                    | ND                    | ND                    | ND                  | ND                   | ND           | ND           |
|        |         | Sevuparin/DF02+<br>Malanil | D1H2      | Pf       | 300                        | ND                   | ND                    | ND                    | ND                    | ND                  | ND                   | ND           | ND           |
|        |         | Sevuparin/DF02+<br>Malanil | D1H3      | Pf       | 300                        | ND                   | ND                    | ND                    | ND                    | ND                  | ND                   | ND           | ND           |
|        |         | Sevuparin/DF02+<br>Malanil | D1H4      | Pf       | 250                        | ND                   | ND                    | ND                    | ND                    | ND                  | ND                   | ND           | ND           |
|        |         | Sevuparin/DF02+<br>Malanil | D1H6      | Pf       | 225                        | ND                   | ND                    | ND                    | ND                    | ND                  | ND                   | ND           | ND           |
|        |         | Sevuparin/DF02+<br>Malanil | D1H8      | Pf       | 150                        | ND                   | ND                    | ND                    | ND                    | ND                  | ND                   | ND           | ND           |
|        |         | Sevuparin/DF02+<br>Malanil | D1H10     | Pf       | 75                         | ND                   | ND                    | ND                    | ND                    | ND                  | ND                   | ND           | ND           |
|        |         | Sevuparin/DF02+<br>Malanil | D1H11     | Pf       | 50                         | ND                   | ND                    | ND                    | ND                    | ND                  | ND                   | ND           | ND           |



## TSM02 Individual subject listings part 2

## CSR Appendix 16.2

| SUBJID | INITIAL | ARM                        | TIMEPOINT | SPECIES  | PARASITAEMIA<br>( $\mu$ L) | Tiny<br>Rings<br>(%) | Small<br>Rings<br>(%) | Large<br>Rings<br>(%) | Early<br>Troph<br>(%) | Mid<br>Troph<br>(%) | Late<br>Troph<br>(%) | Gamet<br>(%) | Schiz<br>(%) |
|--------|---------|----------------------------|-----------|----------|----------------------------|----------------------|-----------------------|-----------------------|-----------------------|---------------------|----------------------|--------------|--------------|
|        |         | Malanil                    |           |          |                            |                      |                       |                       |                       |                     |                      |              |              |
|        |         | Sevuparin/DF02+<br>Malanil | D1H17     | Pf       | 25                         | ND                   | ND                    | ND                    | ND                    | ND                  | ND                   | ND           | ND           |
|        |         | Sevuparin/DF02+<br>Malanil | D1H23     | NEGATIVE | 0                          | ND                   | ND                    | ND                    | ND                    | ND                  | ND                   | ND           | ND           |
|        |         | Sevuparin/DF02+<br>Malanil | D1H29     | NEGATIVE | 0                          | ND                   | ND                    | ND                    | ND                    | ND                  | ND                   | ND           | ND           |
|        |         | Sevuparin/DF02+<br>Malanil | D7        | NEGATIVE | 0                          | ND                   | ND                    | ND                    | ND                    | ND                  | ND                   | ND           | ND           |
|        |         | Sevuparin/DF02+<br>Malanil | D14       | NEGATIVE | 0                          | ND                   | ND                    | ND                    | ND                    | ND                  | ND                   | ND           | ND           |
|        |         | Sevuparin/DF02+<br>Malanil | SCREENING | Pf       | 76860                      | 66                   | 26                    | 7                     | 1                     | 0                   | 0                    | 0            | 0            |
|        |         | Sevuparin/DF02+<br>Malanil | D1H0      | Pf       | 76860                      | 71                   | 27                    | 2                     | 0                     | 0                   | 0                    | 0            | 0            |
|        |         | Sevuparin/DF02+<br>Malanil | D1H1      | Pf       | 81130                      | 51                   | 34                    | 10                    | 5                     | 0                   | 0                    | 0            | 0            |
|        |         | Sevuparin/DF02+<br>Malanil | D1H2      | Pf       | 81130                      | 48                   | 38                    | 10                    | 4                     | 0                   | 0                    | 0            | 0            |
|        |         | Sevuparin/DF02+<br>Malanil | D1H3      | Pf       | 68320                      | 24                   | 54                    | 17                    | 5                     | 0                   | 0                    | 0            | 0            |
|        |         | Sevuparin/DF02+<br>Malanil | D1H4      | Pf       | 59780                      | 29                   | 41                    | 21                    | 9                     | 0                   | 0                    | 0            | 0            |
|        |         | Sevuparin/DF02+<br>Malanil | D1H6      | Pf       | 51240                      | 37                   | 37                    | 10                    | 15                    | 1                   | 0                    | 0            | 0            |
|        |         | Sevuparin/DF02+<br>Malanil | D1H8      | Pf       | 42700                      | 43                   | 34                    | 8                     | 15                    | 0                   | 0                    | 0            | 0            |

## TSM02 Individual subject listings part 2

## CSR Appendix 16.2

| SUBJID | INITIAL | ARM                        | TIMEPOINT | SPECIES  | PARASITAEMIA<br>( $\mu$ L) | Tiny<br>Rings<br>(%) | Small<br>Rings<br>(%) | Large<br>Rings<br>(%) | Early<br>Troph<br>(%) | Mid<br>Troph<br>(%) | Late<br>Troph<br>(%) | Gamet<br>(%) | Schiz<br>(%) |
|--------|---------|----------------------------|-----------|----------|----------------------------|----------------------|-----------------------|-----------------------|-----------------------|---------------------|----------------------|--------------|--------------|
|        |         | Sevuparin/DF02+<br>Malanil | D1H10     | Pf       | 28967                      | 12                   | 28                    | 14                    | 41                    | 3                   | 2                    | 0            | 0            |
|        |         | Sevuparin/DF02+<br>Malanil | D1H11     | Pf       | 22333                      | 15                   | 26                    | 19                    | 33                    | 5                   | 2                    | 0            | 0            |
|        |         | Sevuparin/DF02+<br>Malanil | D1H17     | Pf       | 16382                      | 0                    | 15                    | 13                    | 55                    | 17                  | 0                    | 0            | 0            |
|        |         | Sevuparin/DF02+<br>Malanil | D1H23     | Pf       | 3454                       | 6                    | 6                     | 11                    | 45                    | 23                  | 9                    | 0            | 0            |
|        |         | Sevuparin/DF02+<br>Malanil | D1H29     | Pf       | 276                        | ND                   | ND                    | ND                    | ND                    | ND                  | ND                   | ND           | ND           |
|        |         | Sevuparin/DF02+<br>Malanil | D2H35     | Pf       | 184                        | ND                   | ND                    | ND                    | ND                    | ND                  | ND                   | ND           | ND           |
|        |         | Sevuparin/DF02+<br>Malanil | D2H41     | Pf       | 61                         | ND                   | ND                    | ND                    | ND                    | ND                  | ND                   | ND           | ND           |
|        |         | Sevuparin/DF02+<br>Malanil | D3H47     | Pf       | 31                         | ND                   | ND                    | ND                    | ND                    | ND                  | ND                   | ND           | ND           |
|        |         | Sevuparin/DF02+<br>Malanil | D3H53     | Pf       | 0                          | ND                   | ND                    | ND                    | ND                    | ND                  | ND                   | ND           | ND           |
|        |         | Sevuparin/DF02+<br>Malanil | D3H59     | NEGATIVE | 0                          | ND                   | ND                    | ND                    | ND                    | ND                  | ND                   | ND           | ND           |
|        |         | Sevuparin/DF02+<br>Malanil | D7        | NEGATIVE | 0                          | ND                   | ND                    | ND                    | ND                    | ND                  | ND                   | ND           | ND           |
|        |         | Sevuparin/DF02+<br>Malanil | D14       | NEGATIVE | 0                          | ND                   | ND                    | ND                    | ND                    | ND                  | ND                   | ND           | ND           |
|        |         | Sevuparin/DF02+<br>Malanil | SCREENING | Pf       | 30236                      | 7                    | 29                    | 38                    | 26                    | 0                   | 0                    | 0            | 0            |
|        |         | Sevuparin/DF02+<br>Malanil | D1H0      | Pf       | 20801                      | 11                   | 29                    | 34                    | 23                    | 3                   | 0                    | 0            | 0            |

## TSM02 Individual subject listings part 2

## CSR Appendix 16.2

| SUBJID | INITIAL | ARM                        | TIMEPOINT | SPECIES | PARASITAEMIA<br>( $\mu$ L) | Tiny<br>Rings<br>(%) | Small<br>Rings<br>(%) | Large<br>Rings<br>(%) | Early<br>Troph<br>(%) | Mid<br>Troph<br>(%) | Late<br>Troph<br>(%) | Gamet<br>(%) | Schiz<br>(%) |
|--------|---------|----------------------------|-----------|---------|----------------------------|----------------------|-----------------------|-----------------------|-----------------------|---------------------|----------------------|--------------|--------------|
|        |         | Malanil                    |           |         |                            |                      |                       |                       |                       |                     |                      |              |              |
|        |         | Sevuparin/DF02+<br>Malanil | D1H1      | Pf      | 16937                      | 0                    | 13                    | 20                    | 42                    | 23                  | 2                    | 0            | 0            |
|        |         | Sevuparin/DF02+<br>Malanil | D1H2      | Pf      | 16873                      | 1                    | 11                    | 32                    | 44                    | 7                   | 5                    | 0            | 0            |
|        |         | Sevuparin/DF02+<br>Malanil | D1H3      | Pf      | 14876                      | 0                    | 13                    | 19                    | 46                    | 18                  | 4                    | 0            | 0            |
|        |         | Sevuparin/DF02+<br>Malanil | D1H4      | Pf      | 13556                      | 0                    | 16                    | 18                    | 41                    | 17                  | 8                    | 0            | 0            |
|        |         | Sevuparin/DF02+<br>Malanil | D1H6      | Pf      | 10465                      | 0                    | 18                    | 22                    | 39                    | 15                  | 6                    | 0            | 0            |
|        |         | Sevuparin/DF02+<br>Malanil | D1H8      | Pf      | 9596                       | 0                    | 10                    | 14                    | 47                    | 25                  | 4                    | 0            | 0            |
|        |         | Sevuparin/DF02+<br>Malanil | D1H10     | Pf      | 4508                       | 2                    | 10                    | 10                    | 49                    | 19                  | 10                   | 0            | 0            |
|        |         | Sevuparin/DF02+<br>Malanil | D1H11     | Pf      | 3671                       | 9                    | 9                     | 17                    | 50                    | 9                   | 6                    | 0            | 0            |
|        |         | Sevuparin/DF02+<br>Malanil | D1H17     | Pf      | 1385                       | 18                   | 16                    | 27                    | 35                    | 4                   | 0                    | 0            | 0            |
|        |         | Sevuparin/DF02+<br>Malanil | D1H23     | Pf      | 708                        | 9                    | 4                     | 18                    | 41                    | 23                  | 5                    | 0            | 0            |
|        |         | Sevuparin/DF02+<br>Malanil | D1H29     | Pf      | 171                        | ND                   | ND                    | ND                    | ND                    | ND                  | ND                   | ND           | ND           |
|        |         | Sevuparin/DF02+<br>Malanil | D2H35     | Pf      | 95                         | ND                   | ND                    | ND                    | ND                    | ND                  | ND                   | ND           | ND           |
|        |         | Sevuparin/DF02+<br>Malanil | D2H41     | Pf      | 38                         | ND                   | ND                    | ND                    | ND                    | ND                  | ND                   | ND           | ND           |

## TSM02 Individual subject listings part 2

## CSR Appendix 16.2

| SUBJID | INITIAL | ARM                        | TIMEPOINT | SPECIES  | PARASITAEMIA<br>( $\mu$ L) | Tiny<br>Rings<br>(%) | Small<br>Rings<br>(%) | Large<br>Rings<br>(%) | Early<br>Troph<br>(%) | Mid<br>Troph<br>(%) | Late<br>Troph<br>(%) | Gamet<br>(%) | Schiz<br>(%) |
|--------|---------|----------------------------|-----------|----------|----------------------------|----------------------|-----------------------|-----------------------|-----------------------|---------------------|----------------------|--------------|--------------|
|        |         | Sevuparin/DF02+<br>Malanil | D3H47     | NEGATIVE | 0                          | ND                   | ND                    | ND                    | ND                    | ND                  | ND                   | ND           | ND           |
|        |         | Sevuparin/DF02+<br>Malanil | D3H53     | NEGATIVE | 0                          | ND                   | ND                    | ND                    | ND                    | ND                  | ND                   | ND           | ND           |
|        |         | Sevuparin/DF02+<br>Malanil | D7        | NEGATIVE | 0                          | ND                   | ND                    | ND                    | ND                    | ND                  | ND                   | ND           | ND           |
|        |         | Sevuparin/DF02+<br>Malanil | D14       | NEGATIVE | 0                          | ND                   | ND                    | ND                    | ND                    | ND                  | ND                   | ND           | ND           |
|        |         | Sevuparin/DF02+<br>Malanil | SCREENING | Pf       | 24613                      | 44                   | 44                    | 9                     | 3                     | 0                   | 0                    | 0            | 0            |
|        |         | Sevuparin/DF02+<br>Malanil | D1H0      | Pf       | 20288                      | 33                   | 39                    | 20                    | 8                     | 0                   | 0                    | 0            | 0            |
|        |         | Sevuparin/DF02+<br>Malanil | D1H1      | Pf       | 19336                      | 26                   | 38                    | 28                    | 8                     | 0                   | 0                    | 0            | 0            |
|        |         | Sevuparin/DF02+<br>Malanil | D1H2      | Pf       | 16974                      | 24                   | 31                    | 21                    | 23                    | 0                   | 1                    | 0            | 0            |
|        |         | Sevuparin/DF02+<br>Malanil | D1H3      | Pf       | 16707                      | 14                   | 28                    | 24                    | 32                    | 2                   | 0                    | 0            | 0            |
|        |         | Sevuparin/DF02+<br>Malanil | D1H4      | Pf       | 16231                      | 8                    | 22                    | 29                    | 40                    | 1                   | 0                    | 0            | 0            |
|        |         | Sevuparin/DF02+<br>Malanil | D1H6      | Pf       | 14249                      | 2                    | 11                    | 18                    | 52                    | 16                  | 1                    | 0            | 0            |
|        |         | Sevuparin/DF02+<br>Malanil | D1H8      | Pf       | 14192                      | 1                    | 9                     | 13                    | 42                    | 26                  | 9                    | 0            | 0            |
|        |         | Sevuparin/DF02+<br>Malanil | D1H10     | Pf       | 12268                      | 5                    | 27                    | 18                    | 37                    | 8                   | 5                    | 0            | 0            |
|        |         | Sevuparin/DF02+<br>Malanil | D1H11     | Pf       | 11773                      | 0                    | 8                     | 8                     | 34                    | 31                  | 19                   | 0            | 0            |

## TSM02 Individual subject listings part 2

## CSR Appendix 16.2

| SUBJID | INITIAL | ARM                        | TIMEPOINT | SPECIES  | PARASITAEMIA<br>( $\mu$ L) | Tiny<br>Rings<br>(%) | Small<br>Rings<br>(%) | Large<br>Rings<br>(%) | Early<br>Troph<br>(%) | Mid<br>Troph<br>(%) | Late<br>Troph<br>(%) | Gamet<br>(%) | Schiz<br>(%) |
|--------|---------|----------------------------|-----------|----------|----------------------------|----------------------|-----------------------|-----------------------|-----------------------|---------------------|----------------------|--------------|--------------|
|        |         | Malanil                    |           |          |                            |                      |                       |                       |                       |                     |                      |              |              |
|        |         | Sevuparin/DF02+<br>Malanil | D1H17     | Pf       | 11087                      | 4                    | 2                     | 6                     | 51                    | 21                  | 16                   | 0            | 0            |
|        |         | Sevuparin/DF02+<br>Malanil | D1H23     | Pf       | 5639                       | 0                    | 4                     | 10                    | 43                    | 23                  | 20                   | 0            | 0            |
|        |         | Sevuparin/DF02+<br>Malanil | D1H29     | Pf       | 527                        | 0                    | 10                    | 10                    | 40                    | 20                  | 20                   | 0            | 0            |
|        |         | Sevuparin/DF02+<br>Malanil | D2H35     | Pf       | 229                        | ND                   | ND                    | ND                    | ND                    | ND                  | ND                   | ND           | ND           |
|        |         | Sevuparin/DF02+<br>Malanil | D2H41     | Pf       | 69                         | ND                   | ND                    | ND                    | ND                    | ND                  | ND                   | ND           | ND           |
|        |         | Sevuparin/DF02+<br>Malanil | D3H47     | NEGATIVE | 0                          | ND                   | ND                    | ND                    | ND                    | ND                  | ND                   | ND           | ND           |
|        |         | Sevuparin/DF02+<br>Malanil | D3H53     | NEGATIVE | 0                          | ND                   | ND                    | ND                    | ND                    | ND                  | ND                   | ND           | ND           |
|        |         | Sevuparin/DF02+<br>Malanil | D7        | NEGATIVE | 0                          | ND                   | ND                    | ND                    | ND                    | ND                  | ND                   | ND           | ND           |
|        |         | Sevuparin/DF02+<br>Malanil | D14       | NEGATIVE | 0                          | ND                   | ND                    | ND                    | ND                    | ND                  | ND                   | ND           | ND           |
|        |         | Malanil                    | SCREENING | Pf       | 96300                      | 77                   | 22                    | 1                     | 0                     | 0                   | 0                    | 0            | 0            |
|        |         | Malanil                    | D1H0      | Pf       | 107000                     | 64                   | 31                    | 5                     | 0                     | 0                   | 0                    | 0            | 0            |
|        |         | Malanil                    | D1H1      | Pf       | 101650                     | 70                   | 29                    | 1                     | 0                     | 0                   | 0                    | 0            | 0            |
|        |         | Malanil                    | D1H2      | Pf       | 96300                      | 56                   | 37                    | 7                     | 0                     | 0                   | 0                    | 0            | 0            |
|        |         | Malanil                    | D1H3      | Pf       | 96300                      | 38                   | 38                    | 16                    | 8                     | 0                   | 0                    | 0            | 0            |
|        |         | Malanil                    | D1H4      | Pf       | 90950                      | 49                   | 34                    | 9                     | 7                     | 1                   | 0                    | 0            | 0            |

## TSM02 Individual subject listings part 2

## CSR Appendix 16.2

| SUBJID | INITIAL | ARM     | TIMEPOINT | SPECIES  | PARASITAEMIA<br>( $\mu$ L) | Tiny<br>Rings<br>(%) | Small<br>Rings<br>(%) | Large<br>Rings<br>(%) | Early<br>Troph<br>(%) | Mid<br>Troph<br>(%) | Late<br>Troph<br>(%) | Gamet<br>(%) | Schiz<br>(%) |
|--------|---------|---------|-----------|----------|----------------------------|----------------------|-----------------------|-----------------------|-----------------------|---------------------|----------------------|--------------|--------------|
|        |         | Malanil | D1H6      | Pf       | 96300                      | 61                   | 27                    | 7                     | 5                     | 0                   | 0                    | 0            | 0            |
|        |         | Malanil | D1H8      | Pf       | 90950                      | 45                   | 30                    | 13                    | 9                     | 3                   | 0                    | 0            | 0            |
|        |         | Malanil | D1H10     | Pf       | 85600                      | 43                   | 28                    | 14                    | 15                    | 0                   | 0                    | 0            | 0            |
|        |         | Malanil | D1H11     | Pf       | 80250                      | 37                   | 32                    | 7                     | 19                    | 4                   | 1                    | 0            | 0            |
|        |         | Malanil | D1H17     | Pf       | 74900                      | 15                   | 24                    | 10                    | 32                    | 11                  | 8                    | 0            | 0            |
|        |         | Malanil | D1H23     | Pf       | 69240                      | 9                    | 10                    | 8                     | 35                    | 17                  | 21                   | 0            | 0            |
|        |         | Malanil | D1H29     | Pf       | 20467                      | ND                   | ND                    | ND                    | ND                    | ND                  | ND                   | ND           | ND           |
|        |         | Malanil | D2H35     | Pf       | 6068                       | ND                   | ND                    | ND                    | ND                    | ND                  | ND                   | ND           | ND           |
|        |         | Malanil | D2H41     | Pf       | 2371                       | ND                   | ND                    | ND                    | ND                    | ND                  | ND                   | ND           | ND           |
|        |         | Malanil | D3H47     | Pf       | 1037                       | ND                   | ND                    | ND                    | ND                    | ND                  | ND                   | ND           | ND           |
|        |         | Malanil | D3H53     | Pf       | 718                        | ND                   | ND                    | ND                    | ND                    | ND                  | ND                   | ND           | ND           |
|        |         | Malanil | D3H59     | Pf       | 399                        | ND                   | ND                    | ND                    | ND                    | ND                  | ND                   | ND           | ND           |
|        |         | Malanil | D3H65     | Pf       | 106                        | ND                   | ND                    | ND                    | ND                    | ND                  | ND                   | ND           | ND           |
|        |         | Malanil | D3H71     | NEGATIVE | 0                          | ND                   | ND                    | ND                    | ND                    | ND                  | ND                   | ND           | ND           |
|        |         | Malanil | D4        | NEGATIVE | 0                          | ND                   | ND                    | ND                    | ND                    | ND                  | ND                   | ND           | ND           |
|        |         | Malanil | D7        | NEGATIVE | 0                          | ND                   | ND                    | ND                    | ND                    | ND                  | ND                   | ND           | ND           |
|        |         | Malanil | D14       | NEGATIVE | 0                          | ND                   | ND                    | ND                    | ND                    | ND                  | ND                   | ND           | ND           |
|        |         | Malanil | SCREENING | Pf       | 49824                      | 71                   | 21                    | 7                     | 1                     | 0                   | 0                    | 0            | 0            |
|        |         | Malanil | D1H0      | Pf       | 104310                     | 28                   | 39                    | 15                    | 14                    | 4                   | 0                    | 0            | 0            |
|        |         | Malanil | D1H1      | Pf       | 109800                     | 23                   | 33                    | 20                    | 22                    | 2                   | 0                    | 0            | 0            |
|        |         | Malanil | D1H2      | Pf       | 109800                     | 22                   | 41                    | 13                    | 24                    | 0                   | 0                    | 0            | 0            |
|        |         | Malanil | D1H3      | Pf       | 115290                     | 12                   | 35                    | 29                    | 23                    | 1                   | 0                    | 0            | 0            |

## TSM02 Individual subject listings part 2

## CSR Appendix 16.2

| SUBJID | INITIAL | ARM     | TIMEPOINT | SPECIES  | PARASITAEMIA<br>( $\mu$ L) | Tiny<br>Rings<br>(%) | Small<br>Rings<br>(%) | Large<br>Rings<br>(%) | Early<br>Troph<br>(%) | Mid<br>Troph<br>(%) | Late<br>Troph<br>(%) | Gamet<br>(%) | Schiz<br>(%) |
|--------|---------|---------|-----------|----------|----------------------------|----------------------|-----------------------|-----------------------|-----------------------|---------------------|----------------------|--------------|--------------|
|        |         | Malanil | D1H4      | Pf       | 115290                     | 6                    | 32                    | 31                    | 30                    | 1                   | 0                    | 0            | 0            |
|        |         | Malanil | D1H6      | Pf       | 109800                     | 14                   | 30                    | 28                    | 28                    | 0                   | 0                    | 0            | 0            |
|        |         | Malanil | D1H8      | Pf       | 104310                     | 17                   | 25                    | 22                    | 36                    | 0                   | 0                    | 0            | 0            |
|        |         | Malanil | D1H10     | Pf       | 98820                      | 14                   | 26                    | 21                    | 34                    | 3                   | 2                    | 0            | 0            |
|        |         | Malanil | D1H11     | Pf       | 93330                      | 0                    | 19                    | 27                    | 51                    | 3                   | 0                    | 0            | 0            |
|        |         | Malanil | D1H17     | Pf       | 82350                      | 1                    | 7                     | 11                    | 63                    | 15                  | 3                    | 0            | 0            |
|        |         | Malanil | D1H23     | Pf       | 69020                      | 0                    | 12                    | 5                     | 50                    | 18                  | 15                   | 0            | 0            |
|        |         | Malanil | D1H29     | Pf       | 41272                      | ND                   | ND                    | ND                    | ND                    | ND                  | ND                   | ND           | ND           |
|        |         | Malanil | D2H35     | Pf       | 10134                      | ND                   | ND                    | ND                    | ND                    | ND                  | ND                   | ND           | ND           |
|        |         | Malanil | D2H41     | Pf       | 2432                       | ND                   | ND                    | ND                    | ND                    | ND                  | ND                   | ND           | ND           |
|        |         | Malanil | D3H47     | Pf       | 415                        | ND                   | ND                    | ND                    | ND                    | ND                  | ND                   | ND           | ND           |
|        |         | Malanil | D3H53     | Pf       | 104                        | ND                   | ND                    | ND                    | ND                    | ND                  | ND                   | ND           | ND           |
|        |         | Malanil | D3H59     | NEGATIVE | 0                          | ND                   | ND                    | ND                    | ND                    | ND                  | ND                   | ND           | ND           |
|        |         | Malanil | D3H65     | NEGATIVE | 0                          | ND                   | ND                    | ND                    | ND                    | ND                  | ND                   | ND           | ND           |
|        |         | Malanil | D7        | Pf       | 0                          | ND                   | ND                    | ND                    | ND                    | ND                  | ND                   | ND           | ND           |
|        |         | Malanil | D14       | Pf       | 0                          | ND                   | ND                    | ND                    | ND                    | ND                  | ND                   | ND           | ND           |
|        |         | Malanil | SCREENING | Pf       | 99590                      | 62                   | 29                    | 7                     | 2                     | 0                   | 0                    | 0            | 0            |
|        |         | Malanil | D1H0      | Pf       | 121240                     | 50                   | 40                    | 9                     | 1                     | 0                   | 0                    | 0            | 0            |
|        |         | Malanil | D1H1      | Pf       | 129900                     | 58                   | 39                    | 3                     | 0                     | 0                   | 0                    | 0            | 0            |
|        |         | Malanil | D1H2      | Pf       | 138560                     | 46                   | 46                    | 7                     | 1                     | 0                   | 0                    | 0            | 0            |
|        |         | Malanil | D1H3      | Pf       | 151550                     | 50                   | 33                    | 15                    | 2                     | 0                   | 0                    | 0            | 0            |
|        |         | Malanil | D1H4      | Pf       | 155880                     | 46                   | 40                    | 12                    | 2                     | 0                   | 0                    | 0            | 0            |

## TSM02 Individual subject listings part 2

## CSR Appendix 16.2

| SUBJID | INITIAL | ARM     | TIMEPOINT | SPECIES | PARASITAEMIA<br>( $\mu$ L) | Tiny<br>Rings<br>(%) | Small<br>Rings<br>(%) | Large<br>Rings<br>(%) | Early<br>Troph<br>(%) | Mid<br>Troph<br>(%) | Late<br>Troph<br>(%) | Gamet<br>(%) | Schiz<br>(%) |
|--------|---------|---------|-----------|---------|----------------------------|----------------------|-----------------------|-----------------------|-----------------------|---------------------|----------------------|--------------|--------------|
|        |         | Malanil | D1H6      | Pf      | 151550                     | 33                   | 44                    | 19                    | 4                     | 0                   | 0                    | 0            | 0            |
|        |         | Malanil | D1H8      | Pf      | 147220                     | 36                   | 42                    | 17                    | 5                     | 0                   | 0                    | 0            | 0            |
|        |         | Malanil | D1H10     | Pf      | 138560                     | 18                   | 39                    | 24                    | 14                    | 4                   | 1                    | 0            | 0            |
|        |         | Malanil | D1H11     | Pf      | 129900                     | 17                   | 43                    | 22                    | 14                    | 4                   | 0                    | 0            | 0            |
|        |         | Malanil | D1H17     | Pf      | 121240                     | 5                    | 34                    | 24                    | 24                    | 8                   | 5                    | 0            | 0            |
|        |         | Malanil | D1H23     | Pf      | 99320                      | 0                    | 18                    | 11                    | 48                    | 13                  | 10                   | 0            | 0            |
|        |         | Malanil | D1H29     | Pf      | 61120                      | 1                    | 16                    | 2                     | 28                    | 39                  | 14                   | 0            | 0            |
|        |         | Malanil | D2H35     | Pf      | 14365                      | ND                   | ND                    | ND                    | ND                    | ND                  | ND                   | ND           | ND           |
|        |         | Malanil | D2H41     | Pf      | 2515                       | ND                   | ND                    | ND                    | ND                    | ND                  | ND                   | ND           | ND           |
|        |         | Malanil | D3H47     | Pf      | 1058                       | ND                   | ND                    | ND                    | ND                    | ND                  | ND                   | ND           | ND           |
|        |         | Malanil | D3H53     | Pf      | 554                        | ND                   | ND                    | ND                    | ND                    | ND                  | ND                   | ND           | ND           |
|        |         | Malanil | D3H59     | Pf      | 126                        | ND                   | ND                    | ND                    | ND                    | ND                  | ND                   | ND           | ND           |
|        |         | Malanil | D3H65     | Pf      | 50                         | ND                   | ND                    | ND                    | ND                    | ND                  | ND                   | ND           | ND           |
|        |         | Malanil | D3H71     | Pf      | 0                          | ND                   | ND                    | ND                    | ND                    | ND                  | ND                   | ND           | ND           |
|        |         | Malanil | D4        | Pf      | 0                          | ND                   | ND                    | ND                    | ND                    | ND                  | ND                   | ND           | ND           |
|        |         | Malanil | D7        | Pf      | 0                          | ND                   | ND                    | ND                    | ND                    | ND                  | ND                   | ND           | ND           |
|        |         | Malanil | D14       | Pf      | 0                          | ND                   | ND                    | ND                    | ND                    | ND                  | ND                   | ND           | ND           |



TSM02 Individual subject listings part 2

CSR Appendix 16.2

16.2.6.2 Cytoadherence, rosette assay

*To be reported later.*

TSM02 Individual subject listings part 2

CSR Appendix 16.2

16.2.7 Individual safety data

16.2.7.1 Adverse event listings

| SUBJ ID | INITIAL | ARM                    | AE SEQ | AETERM                       | AEDECOD                      | AESOC                                | DESCRIPTION                                                                                                                                                                             | ONSET DATE TIME<br><i>99:99=UNK</i> | END DATE | OUTCOME   | INTENS | RELAT. DF02    | RELAT. MALANIL   | ALT RELAT | ALT REL OTHER | ACTION               |
|---------|---------|------------------------|--------|------------------------------|------------------------------|--------------------------------------|-----------------------------------------------------------------------------------------------------------------------------------------------------------------------------------------|-------------------------------------|----------|-----------|--------|----------------|------------------|-----------|---------------|----------------------|
|         |         | Sevuparin/DF02+Malanil | 1      | Eosinophilia                 | Eosinophilia                 | Blood and lymphatic system disorders | RESULT EO = 25% DATE 25-AUG-2012 EO = 10% DATE 10-SEP-2012                                                                                                                              |                                     |          | Improving | Mild   | Not related    | Not related      | Other     | PARASITE      | Treatment Medication |
|         |         | Sevuparin/DF02+Malanil | 2      | PARASITE STOOL TEST POSITIVE | Parasite stool test positive | Investigations                       | HIGH LEVEL OF CREATININE KINASE BUT NON CLINICALLY SIGNIFICANT; RESULT STOOL EXAM FOR PARASITE = HOOKWORM EGG DATE 26AUG2012; RESULT STOOL EXAM FOR PARASITE = NONE SEEN DATE 29AUG2012 |                                     |          | Recovered | Mild   | Not related    | Not related      | Other     | PARASITE      | Treatment Medication |
|         |         | Malanil                | 1      | ERYTHEMATOUS RASH            | Rash erythematous            | Skin and subcutaneous tissue         | ERYTHEMA RASH AT ABDOMINAL                                                                                                                                                              |                                     |          | Recovered | Mild   | Not applicable | Possibly related | Other     | UNKNOWN       | Treatment Medication |

## TSM02 Individual subject listings part 2

## CSR Appendix 16.2

| SUBJ ID | INITIAL | ARM                    | AE SEQ | AETERM                          | AEDECOD                              | AESOC                                                | DESCRIPTION                                                                                 | ONSET DATE TIME<br>99:99=UNK | END DATE | OUTCOME   | INTENS   | RELAT. DF02      | RELAT. MALANIL | ALT RELAT          | ALT REL OTHER | ACTION               |
|---------|---------|------------------------|--------|---------------------------------|--------------------------------------|------------------------------------------------------|---------------------------------------------------------------------------------------------|------------------------------|----------|-----------|----------|------------------|----------------|--------------------|---------------|----------------------|
|         |         |                        |        |                                 |                                      | disorders                                            | SURFACE                                                                                     |                              |          |           |          |                  |                |                    |               |                      |
|         |         | Malanil                | 1      | FEVER                           | Pyrexia                              | General disorders and administration site conditions | SUBJECT TOLD THAT HAD FEVER FOR TWO DAYS BUT AS PHYSICAL EXAM ON THIS VISIT NO FEVER FOUND. |                              |          | Recovered | Mild     | Not applicable   | Not related    | Other              | UNKNOWN       | Treatment Medication |
|         |         | Sevuparin/DF02+Malanil | 1      | AST increased                   | Aspartate aminotransferase increased | Investigations                                       | RESULTS AST INCREASED DAY 8 = 176 U/L                                                       |                              |          | Recovered | Moderate | Possibly related | Not related    | Concurrent illness | MALARIA       | None                 |
|         |         | Sevuparin/DF02+Malanil | 2      | ALT INCREASED                   | Alanine aminotransferase increased   | Investigations                                       | RESULTS AST AND ALT INCREASED                                                               |                              |          | Recovered | Moderate | Possibly related | Not related    | Concurrent illness | MALARIA       | None                 |
|         |         | Sevuparin/DF02+Malanil | 1      | PREMATURE VENTRICULAR COMPLEXES | Ventricular extrasystoles            | Cardiac disorders                                    | ECG SINUS TACHYCARDIA / PREMATURE VENTRICULAR COMPLEXES                                     |                              |          | Recovered | Mild     | Not related      | Not related    | Concurrent illness | MALARIA       | None                 |
|         |         | Sevuparin/DF02+Malanil | 2      | ANOREXIA                        | Decreased appetite                   | Metabolism and nutrition disorders                   | ANOREXIA                                                                                    |                              |          | Recovered | Mild     | Not related      | Not related    | Concurrent illness | MALARIA       | Treatment Medication |
|         |         | Sevuparin/DF02+Malanil | 3      | PHARYNGITIS                     | Pharyngitis                          | Infections and infestations                          | FEVER, COUGH, SORE THROAT,                                                                  |                              |          | Recovered | Moderate | Not related      | Not related    | Other              | VIRUS         | Treatment Medication |

## TSM02 Individual subject listings part 2

## CSR Appendix 16.2

| SUBJ ID | INITIAL | ARM                        | AE SEQ | AETERM                  | AEDECOD                    | AESOC                              | DESCRIPTION                                                                        | ONSET DATE TIME<br>99:99=UNK | END DATE | OUTCOME   | INTENS   | RELAT. DF02      | RELAT. MALANIL   | ALT RELAT          | ALT REL OTHER | ACTION               |
|---------|---------|----------------------------|--------|-------------------------|----------------------------|------------------------------------|------------------------------------------------------------------------------------|------------------------------|----------|-----------|----------|------------------|------------------|--------------------|---------------|----------------------|
|         |         |                            |        |                         |                            |                                    | MUSCLE PAIN                                                                        |                              |          |           |          |                  |                  |                    |               |                      |
|         |         | Sevuparin/<br>DF02+Malanil | 4      | SINUS TACHYCARDIA       | Sinus tachycardia          | Cardiac disorders                  | ECG SINUS TACHYCARDIA                                                              |                              |          | Recovered | Mild     | Not related      | Not related      | Concurrent illness | MALARIA       | None                 |
|         |         | Malanil                    | 1      | Platelets decrease      | Platelet count decreased   | Investigations                     | PLATELETS DAY SCREENING RESULT 109,000 THEN PLATELETS (DAY2) TIME 48 RESULT 66,000 |                              |          | Recovered | Mild     | Not applicable   | Not related      | Concurrent illness | MALARIA       | None                 |
|         |         | Malanil                    | 2      | NAUSEA                  | Nausea                     | Gastrointestinal disorders         | NAUSEA                                                                             |                              |          | Recovered | Mild     | Not applicable   | Possibly related | Concurrent illness | MALARIA       | Treatment Medication |
|         |         | Malanil                    | 3      | ANOREXIA                | Decreased appetite         | Metabolism and nutrition disorders | ANOREXIA                                                                           |                              |          | Recovered | Mild     | Not applicable   | Not related      | Concurrent illness | MALARIA       | None                 |
|         |         | Malanil                    | 1      | HYPOKALEMIA             | Hypokalaemia               | Metabolism and nutrition disorders | RESULT POTASSIUM =3.3 MMOL/L (DAY 1)                                               |                              |          | Recovered | Mild     | Not applicable   | Not related      | Concurrent illness | MALARIA       | Treatment Medication |
|         |         | Sevuparin/<br>DF02+Malanil | 1      | URINARY TRACT INFECTION | Urinary tract infection    | Infections and infestations        | RESULT URINE WBC OVER 100 DATE 5 FEB 2013                                          |                              |          | Recovered | Moderate | Not related      | Not related      | Other              | UNKNOWN       | Treatment Medication |
|         |         | Sevuparin/<br>DF02+Malanil | 1      | RESULT AST INCREASE     | Aspartate aminotransferase | Investigations                     | RESULT AST = 173 U/L                                                               |                              |          | Improving | Moderate | Possibly related | Not related      | Other              | UNKNOWN       | None                 |

## TSM02 Individual subject listings part 2

## CSR Appendix 16.2

| SUBJ ID | INITIAL | ARM                        | AE SEQ | AETERM               | AEDECOD                            | AESOC             | DESCRIPTION                                                                                                                              | ONSET DATE TIME<br>99:99=UNK | END DATE | OUTCOME       | INTENS   | RELAT. DF02      | RELAT. MALANIL   | ALT RELAT          | ALT REL OTHER | ACTION |
|---------|---------|----------------------------|--------|----------------------|------------------------------------|-------------------|------------------------------------------------------------------------------------------------------------------------------------------|------------------------------|----------|---------------|----------|------------------|------------------|--------------------|---------------|--------|
|         |         | nil                        |        |                      | ase increased                      |                   |                                                                                                                                          |                              |          |               |          |                  |                  |                    |               |        |
|         |         | Sevuparin/<br>DF02+Malanil | 2      | RESULT ALT INCREASE  | Alanine aminotransferase increased | Investigations    | RESULT ALT= 200 U/L                                                                                                                      |                              |          | Improving     | Moderate | Possibly related | Not related      | Other              | UNKNOWN       | None   |
|         |         | Malanil                    | 1      | Platelets decrease   | Platelet count decreased           | Investigations    | RESULT PLATELETS DATE 12-FEB-2013 = 91 THEN DATE 13-FEB-2013 = 65 AND DATE 14-FEB-2013 = 64 REPEAT DATE 15-FEB-2013 RESULT = 93 10(3)/UL |                              |          | Recovered     | Moderate | Not applicable   | Not related      | Concurrent illness | MALARIA       | None   |
|         |         | Sevuparin/<br>DF02+Malanil | 1      | LONG QTC INTERVAL    | Electrocardiogram QT prolonged     | Investigations    | QTC INTERVAL 456 MS                                                                                                                      |                              |          | Recovered     | Mild     | Not related      | Possibly related | Other              | UNKNOWN       | None   |
|         |         | Malanil                    | 1      | PVC                  | Ventricular extrasystoles          | Cardiac disorders | PREMATURE VENTRICULAR CONTRACTION                                                                                                        |                              |          | Recovered     | Mild     | Not applicable   | Not related      | Other              | UNKNOWN       | None   |
|         |         | Sevuparin/<br>DF02+Malanil | 1      | PLATELETS DECREASED  | Platelet count decreased           | Investigations    | RESULT PLATELETS DAY 1 = 28,000 /UL, DAY 2 = 29,000 /UL                                                                                  |                              |          | Recovered     | Severe   | Possibly related | Possibly related | Concurrent illness | MALARIA       | None   |
|         |         | Sevuparin/<br>DF02+Malanil | 2      | ALKALINE PHOSPHATASE | Blood alkaline phosphatase         | Investigations    | RESULT ALP DAY 7 = 138 U/L, DAY 14 =                                                                                                     |                              |          | Not recovered | Mild     | Possibly related | Possibly related | Concurrent illness | MALARIA       | None   |

## TSM02 Individual subject listings part 2

## CSR Appendix 16.2

| SUBJ ID | INITIAL | ARM                    | AE SEQ | AETERM                                   | AEDECOD                              | AESOC          | DESCRIPTION                                                                   | ONSET DATE TIME<br>99:99=UNK | END DATE | OUTCOME       | INTENS   | RELAT. DF02      | RELAT. MALANIL   | ALT RELAT          | ALT REL OTHER                      | ACTION |
|---------|---------|------------------------|--------|------------------------------------------|--------------------------------------|----------------|-------------------------------------------------------------------------------|------------------------------|----------|---------------|----------|------------------|------------------|--------------------|------------------------------------|--------|
|         |         | nil                    |        | INCREASED                                | increased                            |                | 208 U/L                                                                       |                              |          |               |          |                  |                  |                    |                                    |        |
|         |         | Sevuparin/DF02+Malanil | 3      | ALANINE AMINOTRANSFERASE INCREASED       | Alanine aminotransferase increased   | Investigations | RESULT ALT DAY 7 = 391 U/L, DAY 14 = 380 U/L                                  |                              |          | Not recovered | Severe   | Possibly related | Possibly related | Concurrent illness | MALARIA                            | None   |
|         |         | Sevuparin/DF02+Malanil | 4      | ASPARTATE AMINOTRANSFERASE INCREASED     | Aspartate aminotransferase increased | Investigations | RESULT AST DAY 7 = 451 U/L                                                    |                              |          | Improving     | Severe   | Possibly related | Possibly related | Concurrent illness | MALARIA                            | None   |
|         |         | Sevuparin/DF02+Malanil | 5      | BLOOD BILIRUBIN INCREASED                | Blood bilirubin increased            | Investigations | RESULT TOTAL BILIRUBIN =1.99 MG/DL                                            |                              |          | Not recovered | Moderate | Possibly related | Possibly related | Concurrent illness | MALARIA                            | None   |
|         |         | Malanil                | 1      | ELECTROCARDIOGRAM QTc INTERVAL PROLONGED | Electrocardiogram QT prolonged       | Investigations | QTC INTERVAL 11-APR-2013 = 475 MS, 14-APR-2013 = 538 MS, 17-APR-2013 = 444 MS |                              |          | Recovered     | Mild     | Not applicable   | Not related      | Other              | UNKNOWN                            | None   |
|         |         | Malanil                | 2      | PLATELETS DECREASED                      | Platelet count decreased             | Investigations | RESULT PLATELETS 12-APR-2013 = 87,000 /UL, 17-APR-2013 = 273,000 /UL          |                              |          | Recovered     | Mild     | Not applicable   | Not related      | Concurrent illness | MALARIA                            | None   |
|         |         | Malanil                | 1      | Aspartate Aminotransferase Increased     | Aspartate aminotransferase increased | Investigations | RESULT AST DAY7 = 143 U/L                                                     |                              |          | Not recovered | Moderate | Not applicable   | Not related      | Other              | PATIENT HAVE HISTORY DRINK ALCOHOL | None   |

TSM02 Individual subject listings part 2

CSR Appendix 16.2

| SUBJ ID | INITIAL | ARM     | AE SEQ | AETERM      | AEDECOD     | AESOC             | DESCRIPTION                        | ONSET DATE TIME<br><i>99:99=UNK</i> | END DATE | OUTCOME   | INTENS | RELAT. DF02    | RELAT. MALANIL | ALT RELAT | ALT REL OTHER | ACTION |
|---------|---------|---------|--------|-------------|-------------|-------------------|------------------------------------|-------------------------------------|----------|-----------|--------|----------------|----------------|-----------|---------------|--------|
|         |         |         |        |             |             |                   |                                    |                                     |          |           |        |                |                |           | EVERY DAY.    |        |
|         |         | Malanil | 1      | BRADYCARDIA | Bradycardia | Cardiac disorders | BRADYCARDIA<br>A HEART RATE=47 BPM |                                     |          | Recovered | Mild   | Not applicable | Not related    | Other     | UNKNOWN       | None   |

TSM02 Individual subject listings part 2  
CSR Appendix 16.2

16.2.7.2 Serious adverse event listing  
*Not applicable.*



## TSM02 Individual subject listings part 2

## CSR Appendix 16.2

## 16.2.7.3 Physical examination (including weight and height)

| SUBJID | INITIAL | ARM                    | DAY | HGT (cm) | WGT (kg) | GCSEYE | GCSVERBAL | GCSMOTOR | GCSTOTAL |
|--------|---------|------------------------|-----|----------|----------|--------|-----------|----------|----------|
|        |         | Malanil                | 0   | 157      | 50       | 4      | 5         | 6        | 15       |
|        |         | Malanil                | 4   | NA       | 50       | NA     | NA        | NA       | NA       |
|        |         | Sevuparin/DF02+Malanil | 0   | 163      | 55       | 4      | 5         | 6        | 15       |
|        |         | Sevuparin/DF02+Malanil | 4   | NA       | 55.7     | NA     | NA        | NA       | NA       |
|        |         | Sevuparin/DF02+Malanil | 7   | NA       | 54.5     | 4      | 5         | 6        | 15       |
|        |         | Sevuparin/DF02+Malanil | 14  | NA       | 54.1     | 4      | 5         | 6        | 15       |
|        |         | Sevuparin/DF02+Malanil | 0   | 160      | 48       | 4      | 5         | 6        | 15       |
|        |         | Sevuparin/DF02+Malanil | 4   | NA       | 47.7     | NA     | NA        | NA       | NA       |
|        |         | Sevuparin/DF02+Malanil | 7   | NA       | 48.1     | 4      | 5         | 6        | 15       |
|        |         | Sevuparin/DF02+Malanil | 14  | NA       | 48.6     | 4      | 5         | 6        | 15       |
|        |         | Malanil                | 0   | 173      | 62       | 4      | 5         | 6        | 15       |
|        |         | Malanil                | 4   | NA       | 62.5     | NA     | NA        | NA       | NA       |
|        |         | Malanil                | 7   | NA       | 61.7     | 4      | 5         | 6        | 15       |
|        |         | Malanil                | 14  | NA       | 62.9     | 4      | 5         | 6        | 15       |
|        |         | Malanil                | 0   | 160      | 55       | 4      | 5         | 6        | 15       |
|        |         | Malanil                | 4   | NA       | 56.5     | NA     | NA        | NA       | NA       |
|        |         | Malanil                | 7   | NA       | 55.8     | 4      | 5         | 6        | 15       |
|        |         | Malanil                | 14  | NA       | 55.6     | 4      | 5         | 6        | 15       |
|        |         | Sevuparin/DF02+Malanil | 0   | 168      | 64.2     | 4      | 5         | 6        | 15       |
|        |         | Sevuparin/DF02+Malanil | 4   | NA       | 65.5     | NA     | NA        | NA       | NA       |
|        |         | Sevuparin/DF02+Malanil | 7   | NA       | 63.4     | 4      | 5         | 6        | 15       |

## TSM02 Individual subject listings part 2

## CSR Appendix 16.2

| SUBJID | INITIAL | ARM                    | DAY | HGT (cm) | WGT (kg) | GCSEYE | GCSVERBAL | GCSMOTOR | GCSTOTAL |
|--------|---------|------------------------|-----|----------|----------|--------|-----------|----------|----------|
|        |         | Sevuparin/DF02+Malanil | 14  | NA       | 66.1     | 4      | 5         | 6        | 15       |
|        |         | Malanil                | 0   | 160      | 56.5     | 4      | 5         | 6        | 15       |
|        |         | Malanil                | 4   | NA       | 56.6     | NA     | NA        | NA       | NA       |
|        |         | Malanil                | 7   | NA       | 55.6     | 4      | 5         | 6        | 15       |
|        |         | Sevuparin/DF02+Malanil | 0   | 167      | 57.6     | 4      | 5         | 6        | 15       |
|        |         | Sevuparin/DF02+Malanil | 4   | NA       | 57.8     | NA     | NA        | NA       | NA       |
|        |         | Sevuparin/DF02+Malanil | 7   | NA       | 56.5     | 4      | 5         | 6        | 15       |
|        |         | Sevuparin/DF02+Malanil | 14  | NA       | 55.7     | 4      | 5         | 6        | 15       |
|        |         | Sevuparin/DF02+Malanil | 0   | 163      | 49.3     | 4      | 5         | 6        | 15       |
|        |         | Sevuparin/DF02+Malanil | 4   | NA       | 49       | NA     | NA        | NA       | NA       |
|        |         | Sevuparin/DF02+Malanil | 7   | NA       | 50.2     | 4      | 5         | 6        | 15       |
|        |         | Sevuparin/DF02+Malanil | 14  | NA       | 51.3     | 4      | 5         | 6        | 15       |
|        |         | Malanil                | 0   | 165      | 51       | 4      | 5         | 6        | 15       |
|        |         | Malanil                | 4   | NA       | 50       | NA     | NA        | NA       | NA       |
|        |         | Malanil                | 7   | NA       | 53.1     | 4      | 5         | 6        | 15       |
|        |         | Malanil                | 14  | NA       | 52       | 4      | 5         | 6        | 15       |
|        |         | Malanil                | 0   | 158      | 50.2     | 4      | 5         | 6        | 15       |
|        |         | Malanil                | 4   | NA       | 48       | NA     | NA        | NA       | NA       |
|        |         | Malanil                | 7   | NA       | 48.4     | 4      | 5         | 6        | 15       |
|        |         | Malanil                | 14  | NA       | 48.1     | 4      | 5         | 6        | 15       |
|        |         | Sevuparin/DF02+Malanil | 0   | 161      | 54.7     | 4      | 5         | 6        | 15       |
|        |         | Sevuparin/DF02+Malanil | 4   | NA       | 55.1     | NA     | NA        | NA       | NA       |
|        |         | Sevuparin/DF02+Malanil | 7   | NA       | 54.9     | 4      | 5         | 6        | 15       |

## TSM02 Individual subject listings part 2

## CSR Appendix 16.2

| SUBJID | INITIAL | ARM                    | DAY | HGT (cm) | WGT (kg) | GCSEYE | GCSVERBAL | GCSMOTOR | GCSTOTAL |
|--------|---------|------------------------|-----|----------|----------|--------|-----------|----------|----------|
|        |         | Sevuparin/DF02+Malanil | 0   | 157      | 54.2     | 4      | 5         | 6        | 15       |
|        |         | Sevuparin/DF02+Malanil | 4   | NA       | 54.2     | NA     | NA        | NA       | NA       |
|        |         | Sevuparin/DF02+Malanil | 7   | NA       | 53       | 4      | 5         | 6        | 15       |
|        |         | Sevuparin/DF02+Malanil | 14  | NA       | 52.8     | 4      | 5         | 6        | 15       |
|        |         | Malanil                | 0   | 161      | 55.4     | 4      | 5         | 6        | 15       |
|        |         | Malanil                | 4   | NA       | 53.3     | NA     | NA        | NA       | NA       |
|        |         | Malanil                | 7   | NA       | 53.8     | 4      | 5         | 6        | 15       |
|        |         | Malanil                | 14  | NA       | 54.2     | 4      | 5         | 6        | 15       |
|        |         | Malanil                | 0   | 171      | 55.9     | 4      | 5         | 6        | 15       |
|        |         | Malanil                | 4   | NA       | 56.3     | NA     | NA        | NA       | NA       |
|        |         | Malanil                | 7   | NA       | 57.1     | 4      | 5         | 6        | 15       |
|        |         | Malanil                | 14  | NA       | 56.8     | 4      | 5         | 6        | 15       |
|        |         | Malanil                | 0   | 150      | 49.4     | 4      | 5         | 6        | 15       |
|        |         | Malanil                | 4   | NA       | 48.5     | NA     | NA        | NA       | NA       |
|        |         | Malanil                | 7   | NA       | 48.7     | 4      | 5         | 6        | 15       |
|        |         | Malanil                | 14  | NA       | 48.8     | 4      | 5         | 6        | 15       |
|        |         | Sevuparin/DF02+Malanil | 0   | 159      | 56.7     | 4      | 5         | 6        | 15       |
|        |         | Sevuparin/DF02+Malanil | 4   | NA       | 56.6     | NA     | NA        | NA       | NA       |
|        |         | Sevuparin/DF02+Malanil | 7   | NA       | 54.9     | 4      | 5         | 6        | 15       |
|        |         | Sevuparin/DF02+Malanil | 14  | NA       | 54       | 4      | 5         | 6        | 15       |
|        |         | Sevuparin/DF02+Malanil | 0   | 164      | 67.3     | 4      | 5         | 6        | 15       |
|        |         | Sevuparin/DF02+Malanil | 4   | NA       | 66.9     | NA     | NA        | NA       | NA       |
|        |         | Sevuparin/DF02+Malanil | 7   | NA       | 68.6     | 4      | 5         | 6        | 15       |

## TSM02 Individual subject listings part 2

## CSR Appendix 16.2

| SUBJID | INITIAL | ARM                    | DAY | HGT (cm) | WGT (kg) | GCSEYE | GCSVERBAL | GCSMOTOR | GCSTOTAL |
|--------|---------|------------------------|-----|----------|----------|--------|-----------|----------|----------|
|        |         | Sevuparin/DF02+Malanil | 14  | NA       | 68.5     | 4      | 5         | 6        | 15       |
|        |         | Sevuparin/DF02+Malanil | 0   | 155      | 50.1     | 4      | 5         | 6        | 15       |
|        |         | Sevuparin/DF02+Malanil | 4   | NA       | 49.7     | NA     | NA        | NA       | NA       |
|        |         | Sevuparin/DF02+Malanil | 7   | NA       | 49.7     | 4      | 5         | 6        | 15       |
|        |         | Sevuparin/DF02+Malanil | 14  | NA       | 48.6     | 4      | 5         | 6        | 15       |
|        |         | Malanil                | 0   | 168      | 54.4     | 4      | 5         | 6        | 15       |
|        |         | Malanil                | 4   | NA       | 55.5     | NA     | NA        | NA       | NA       |
|        |         | Malanil                | 7   | NA       | 57       | 4      | 5         | 6        | 15       |
|        |         | Malanil                | 14  | NA       | 58       | 4      | 5         | 6        | 15       |
|        |         | Sevuparin/DF02+Malanil | 0   | 165      | 56.1     | 4      | 5         | 6        | 15       |
|        |         | Sevuparin/DF02+Malanil | 4   | NA       | 54.1     | NA     | NA        | NA       | NA       |
|        |         | Sevuparin/DF02+Malanil | 7   | NA       | 54       | 4      | 5         | 6        | 15       |
|        |         | Sevuparin/DF02+Malanil | 14  | NA       | 56       | 4      | 5         | 6        | 15       |
|        |         | Sevuparin/DF02+Malanil | 0   | 163      | 49       | 4      | 5         | 6        | 15       |
|        |         | Sevuparin/DF02+Malanil | 4   | NA       | 50.8     | NA     | NA        | NA       | NA       |
|        |         | Sevuparin/DF02+Malanil | 7   | NA       | 50.6     | 4      | 5         | 6        | 15       |
|        |         | Sevuparin/DF02+Malanil | 14  | NA       | 48       | 4      | 5         | 6        | 15       |
|        |         | Sevuparin/DF02+Malanil | 0   | 152      | 66.9     | 4      | 5         | 6        | 15       |
|        |         | Sevuparin/DF02+Malanil | 4   | NA       | 66.1     | NA     | NA        | NA       | NA       |
|        |         | Sevuparin/DF02+Malanil | 7   | NA       | 66.7     | 4      | 5         | 6        | 15       |
|        |         | Sevuparin/DF02+Malanil | 14  | NA       | 66.4     | 4      | 5         | 6        | 15       |
|        |         | Sevuparin/DF02+Malanil | 0   | 154      | 44.7     | 4      | 5         | 6        | 15       |
|        |         | Sevuparin/DF02+Malanil | 4   | NA       | 42.6     | NA     | NA        | NA       | NA       |

## TSM02 Individual subject listings part 2

## CSR Appendix 16.2

| SUBJID | INITIAL | ARM                    | DAY | HGT (cm) | WGT (kg) | GCSEYE | GCSVERBAL | GCSMOTOR | GCSTOTAL |
|--------|---------|------------------------|-----|----------|----------|--------|-----------|----------|----------|
|        |         | Sevuparin/DF02+Malanil | 7   | NA       | 44.4     | 4      | 5         | 6        | 15       |
|        |         | Sevuparin/DF02+Malanil | 14  | NA       | 43.8     | 4      | 5         | 6        | 15       |
|        |         | Malanil                | 0   | 142      | 48.1     | 4      | 5         | 6        | 15       |
|        |         | Malanil                | 4   | NA       | 47.5     | NA     | NA        | NA       | NA       |
|        |         | Malanil                | 7   | NA       | 45.3     | 4      | 5         | 6        | 15       |
|        |         | Malanil                | 14  | NA       | 47.9     | 4      | 5         | 6        | 15       |
|        |         | Malanil                | 0   | 161      | 59.7     | 4      | 5         | 6        | 15       |
|        |         | Malanil                | 4   | NA       | 58.2     | NA     | NA        | NA       | NA       |
|        |         | Malanil                | 7   | NA       | 59.5     | 4      | 5         | 6        | 15       |
|        |         | Malanil                | 14  | NA       | 60.6     | 4      | 5         | 6        | 15       |
|        |         | Malanil                | 0   | 157      | 54.5     | 4      | 5         | 6        | 15       |
|        |         | Malanil                | 4   | NA       | 55.8     | NA     | NA        | NA       | NA       |
|        |         | Malanil                | 7   | NA       | 53.9     | 4      | 5         | 6        | 15       |
|        |         | Malanil                | 14  | NA       | 52.3     | 4      | 5         | 6        | 15       |
|        |         | Sevuparin/DF02+Malanil | 0   | 163      | 54.8     | 4      | 5         | 6        | 15       |
|        |         | Sevuparin/DF02+Malanil | 4   | NA       | 53.8     | NA     | NA        | NA       | NA       |
|        |         | Sevuparin/DF02+Malanil | 7   | NA       | 54.7     | 4      | 5         | 6        | 15       |
|        |         | Sevuparin/DF02+Malanil | 14  | NA       | 50.6     | 4      | 5         | 6        | 15       |
|        |         | Malanil                | 0   | 169      | 54.4     | 4      | 5         | 6        | 15       |
|        |         | Malanil                | 4   | NA       | 52.3     | NA     | NA        | NA       | NA       |
|        |         | Malanil                | 7   | NA       | 52.3     | 4      | 5         | 6        | 15       |
|        |         | Malanil                | 14  | NA       | 52.6     | 4      | 5         | 6        | 15       |
|        |         | Malanil                | 0   | 155      | 51.7     | 4      | 5         | 6        | 15       |

## TSM02 Individual subject listings part 2

## CSR Appendix 16.2

| SUBJID | INITIAL | ARM                    | DAY | HGT (cm) | WGT (kg) | GCSEYE | GCSVERBAL | GCSMOTOR | GCSTOTAL |
|--------|---------|------------------------|-----|----------|----------|--------|-----------|----------|----------|
|        |         | Malanil                | 4   | NA       | 51       | NA     | NA        | NA       | NA       |
|        |         | Malanil                | 7   | NA       | 52.2     | 4      | 5         | 6        | 15       |
|        |         | Malanil                | 14  | NA       | 53.1     | 4      | 5         | 6        | 15       |
|        |         | Malanil                | 0   | 156      | 53.5     | 4      | 5         | 6        | 15       |
|        |         | Malanil                | 4   | NA       | 53.3     | NA     | NA        | NA       | NA       |
|        |         | Malanil                | 7   | NA       | 53.3     | 4      | 5         | 6        | 15       |
|        |         | Malanil                | 14  | NA       | 54.9     | 4      | 5         | 6        | 15       |
|        |         | Malanil                | 0   | 161      | 48.3     | 4      | 5         | 6        | 15       |
|        |         | Malanil                | 4   | NA       | 48.5     | NA     | NA        | NA       | NA       |
|        |         | Malanil                | 7   | NA       | 49.1     | 4      | 5         | 6        | 15       |
|        |         | Malanil                | 14  | NA       | 49.9     | 4      | 5         | 6        | 15       |
|        |         | Sevuparin/DF02+Malanil | 0   | 159      | 44.8     | 4      | 5         | 6        | 15       |
|        |         | Sevuparin/DF02+Malanil | 4   | NA       | 44.1     | NA     | NA        | NA       | NA       |
|        |         | Sevuparin/DF02+Malanil | 7   | NA       | 43.6     | 4      | 5         | 6        | 15       |
|        |         | Sevuparin/DF02+Malanil | 14  | NA       | 45.4     | 4      | 5         | 6        | 15       |
|        |         | Malanil                | 0   | 157      | 51.8     | 4      | 5         | 6        | 15       |
|        |         | Malanil                | 4   | NA       | 50.9     | NA     | NA        | NA       | NA       |
|        |         | Malanil                | 7   | NA       | 51.5     | 4      | 5         | 6        | 15       |
|        |         | Malanil                | 14  | NA       | 51.4     | 4      | 5         | 6        | 15       |
|        |         | Malanil                | 0   | 161      | 47       | 4      | 5         | 6        | 15       |
|        |         | Malanil                | 4   | NA       | 46.3     | NA     | NA        | NA       | NA       |
|        |         | Malanil                | 7   | NA       | 44.3     | 4      | 5         | 6        | 15       |
|        |         | Malanil                | 14  | NA       | 45.9     | 4      | 5         | 6        | 15       |

## TSM02 Individual subject listings part 2

## CSR Appendix 16.2

| SUBJID | INITIAL | ARM                    | DAY | HGT (cm) | WGT (kg) | GCSEYE | GCSVERBAL | GCSMOTOR | GCSTOTAL |
|--------|---------|------------------------|-----|----------|----------|--------|-----------|----------|----------|
|        |         | Malanil                | 0   | 161      | 53.5     | 4      | 5         | 6        | 15       |
|        |         | Malanil                | 4   | NA       | 53.4     | NA     | NA        | NA       | NA       |
|        |         | Malanil                | 7   | NA       | 54.5     | 4      | 5         | 6        | 15       |
|        |         | Malanil                | 14  | NA       | 52.6     | 4      | 5         | 6        | 15       |
|        |         | Sevuparin/DF02+Malanil | 0   | 164      | 57.2     | 4      | 5         | 6        | 15       |
|        |         | Sevuparin/DF02+Malanil | 4   | NA       | 56.9     | NA     | NA        | NA       | NA       |
|        |         | Sevuparin/DF02+Malanil | 7   | NA       | 57.4     | 4      | 5         | 6        | 15       |
|        |         | Sevuparin/DF02+Malanil | 14  | NA       | 57.4     | 4      | 5         | 6        | 15       |
|        |         | Sevuparin/DF02+Malanil | 0   | 159      | 51.3     | 4      | 5         | 6        | 15       |
|        |         | Sevuparin/DF02+Malanil | 4   | NA       | 51.9     | NA     | NA        | NA       | NA       |
|        |         | Sevuparin/DF02+Malanil | 7   | NA       | 50.8     | 4      | 5         | 6        | 15       |
|        |         | Sevuparin/DF02+Malanil | 14  | NA       | 52       | 4      | 5         | 6        | 15       |
|        |         | Sevuparin/DF02+Malanil | 0   | 162      | 55.6     | 4      | 5         | 6        | 15       |
|        |         | Sevuparin/DF02+Malanil | 4   | NA       | 53.8     | NA     | NA        | NA       | NA       |
|        |         | Sevuparin/DF02+Malanil | 7   | NA       | 52.1     | 4      | 5         | 6        | 15       |
|        |         | Sevuparin/DF02+Malanil | 14  | NA       | 55.8     | 4      | 5         | 6        | 15       |
|        |         | Sevuparin/DF02+Malanil | 0   | 161      | 44.3     | 4      | 5         | 6        | 15       |
|        |         | Sevuparin/DF02+Malanil | 4   | NA       | 46.3     | NA     | NA        | NA       | NA       |
|        |         | Sevuparin/DF02+Malanil | 7   | NA       | 47       | 4      | 5         | 6        | 15       |
|        |         | Sevuparin/DF02+Malanil | 14  | NA       | 47       | 4      | 5         | 6        | 15       |
|        |         | Sevuparin/DF02+Malanil | 0   | 159      | 43.6     | 4      | 5         | 6        | 15       |
|        |         | Sevuparin/DF02+Malanil | 4   | NA       | 43.7     | NA     | NA        | NA       | NA       |
|        |         | Sevuparin/DF02+Malanil | 7   | NA       | 44.3     | 4      | 5         | 6        | 15       |

TSM02 Individual subject listings part 2

CSR Appendix 16.2

| SUBJID | INITIAL | ARM                    | DAY | HGT (cm) | WGT (kg) | GCSEYE | GCSVERBAL | GCSMOTOR | GCSTOTAL |
|--------|---------|------------------------|-----|----------|----------|--------|-----------|----------|----------|
|        |         | Sevuparin/DF02+Malanil | 14  | NA       | 44.5     | 4      | 5         | 6        | 15       |
|        |         | Malanil                | 0   | 159      | 45.8     | 4      | 5         | 6        | 15       |
|        |         | Malanil                | 4   | NA       | 44.7     | NA     | NA        | NA       | NA       |
|        |         | Malanil                | 7   | NA       | 45.8     | 4      | 5         | 6        | 15       |
|        |         | Malanil                | 14  | NA       | 46.9     | 4      | 5         | 6        | 15       |
|        |         | Malanil                | 0   | 165      | 54.5     | 4      | 5         | 6        | 15       |
|        |         | Malanil                | 4   | NA       | 53.9     | NA     | NA        | NA       | NA       |
|        |         | Malanil                | 7   | NA       | 55.5     | 4      | 5         | 6        | 15       |
|        |         | Malanil                | 14  | NA       | 56.6     | 4      | 5         | 6        | 15       |
|        |         | Malanil                | 0   | 156      | 50       | 4      | 5         | 6        | 15       |
|        |         | Malanil                | 4   | NA       | 51.2     | NA     | NA        | NA       | NA       |
|        |         | Malanil                | 5   | NA       | 51.2     | NA     | NA        | NA       | NA       |
|        |         | Malanil                | 7   | NA       | 50.7     | 4      | 5         | 6        | 15       |
|        |         | Malanil                | 14  | NA       | 50.3     | 4      | 5         | 6        | 15       |



TSM02 Individual subject listings part 2

CSR Appendix 16.2

16.2.7.3 Physical examination (including weight and height) (-continued)

| SUBJID | INITIAL | ARM                    | DAY | SKIN   | HEAD   | EYES   | EYES<br>DETAIL | EARS   | NOSE   | THROAT | NECK   | NECK<br>DETAIL |
|--------|---------|------------------------|-----|--------|--------|--------|----------------|--------|--------|--------|--------|----------------|
|        |         | Malanil                | 0   | Normal | Normal | Normal |                | Normal | Normal | Normal | Normal |                |
|        |         | Malanil                | 2   | Normal | Normal | Normal |                | Normal | Normal | Normal | Normal |                |
|        |         | Malanil                | 3   | Normal | Normal | Normal |                | Normal | Normal | Normal | Normal |                |
|        |         | Malanil                | 4   | Normal | Normal | Normal |                | Normal | Normal | Normal | Normal |                |
|        |         | Sevuparin/DF02+Malanil | 0   | Normal | Normal | Normal |                | Normal | Normal | Normal | Normal |                |
|        |         | Sevuparin/DF02+Malanil | 2   | Normal | Normal | Normal |                | Normal | Normal | Normal | Normal |                |
|        |         | Sevuparin/DF02+Malanil | 3   | Normal | Normal | Normal |                | Normal | Normal | Normal | Normal |                |
|        |         | Sevuparin/DF02+Malanil | 4   | Normal | Normal | Normal |                | Normal | Normal | Normal | Normal |                |
|        |         | Sevuparin/DF02+Malanil | 7   | Normal | Normal | Normal |                | Normal | Normal | Normal | Normal |                |
|        |         | Sevuparin/DF02+Malanil | 14  | Normal | Normal | Normal |                | Normal | Normal | Normal | Normal |                |
|        |         | Sevuparin/DF02+Malanil | 0   | Normal | Normal | Normal |                | Normal | Normal | Normal | Normal |                |
|        |         | Sevuparin/DF02+Malanil | 2   | Normal | Normal | Normal |                | Normal | Normal | Normal | Normal |                |
|        |         | Sevuparin/DF02+Malanil | 3   | Normal | Normal | Normal |                | Normal | Normal | Normal | Normal |                |
|        |         | Sevuparin/DF02+Malanil | 4   | Normal | Normal | Normal |                | Normal | Normal | Normal | Normal |                |
|        |         | Sevuparin/DF02+Malanil | 7   | Normal | Normal | Normal |                | Normal | Normal | Normal | Normal |                |
|        |         | Sevuparin/DF02+Malanil | 14  | Normal | Normal | Normal |                | Normal | Normal | Normal | Normal |                |
|        |         | Malanil                | 0   | Normal | Normal | Normal |                | Normal | Normal | Normal | Normal |                |
|        |         | Malanil                | 2   | Normal | Normal | Normal |                | Normal | Normal | Normal | Normal |                |
|        |         | Malanil                | 3   | Normal | Normal | Normal |                | Normal | Normal | Normal | Normal |                |
|        |         | Malanil                | 4   | Normal | Normal | Normal |                | Normal | Normal | Normal | Normal |                |
|        |         | Malanil                | 7   | Normal | Normal | Normal |                | Normal | Normal | Normal | Normal |                |
|        |         | Malanil                | 14  | Normal | Normal | Normal |                | Normal | Normal | Normal | Normal |                |

TSM02 Individual subject listings part 2

CSR Appendix 16.2

| SUBJID | INITIAL | ARM     | DAY | SKIN   | HEAD   | EYES   | EYES<br>DETAIL | EARS   | NOSE   | THROAT | NECK     | NECK<br>DETAIL                                                 |
|--------|---------|---------|-----|--------|--------|--------|----------------|--------|--------|--------|----------|----------------------------------------------------------------|
|        |         | Malanil | 0   | Normal | Normal | Normal |                | Normal | Normal | Normal | Abnormal | CYSTIC<br>MASS AT<br>ADAM<br>APPLE AREA<br>DIAMETER<br>3CM-NSC |
|        |         | Malanil | 2   | Normal | Normal | Normal |                | Normal | Normal | Normal | Abnormal | CYSTIC<br>MASS AT<br>ADAM<br>APPLE AREA<br>DIAMETER<br>3CM-NSC |
|        |         | Malanil | 3   | Normal | Normal | Normal |                | Normal | Normal | Normal | Abnormal | CYSTIC<br>MASS AT<br>ADAM<br>APPLE AREA<br>DIAMETER<br>3CM-NSC |
|        |         | Malanil | 4   | Normal | Normal | Normal |                | Normal | Normal | Normal | Abnormal | CYSTIC<br>MASS AT<br>ADAM<br>APPLE AREA<br>DIAMETER<br>3CM     |
|        |         | Malanil | 7   | Normal | Normal | Normal |                | Normal | Normal | Normal | Abnormal | CYSTIC<br>MASS AT<br>ADAM<br>APPLE AREA<br>DIAMETER<br>3CM     |
|        |         | Malanil | 14  | Normal | Normal | Normal |                | Normal | Normal | Normal | Abnormal | CYSTIC<br>MASS AT<br>ADAM                                      |

TSM02 Individual subject listings part 2

CSR Appendix 16.2

| SUBJID | INITIAL | ARM                    | DAY | SKIN   | HEAD   | EYES   | EYES<br>DETAIL | EARS   | NOSE   | THROAT | NECK   | NECK<br>DETAIL                |
|--------|---------|------------------------|-----|--------|--------|--------|----------------|--------|--------|--------|--------|-------------------------------|
|        |         |                        |     |        |        |        |                |        |        |        |        | APPLE AREA<br>DIAMETER<br>3CM |
|        |         | Sevuparin/DF02+Malanil | 0   | Normal | Normal | Normal |                | Normal | Normal | Normal | Normal |                               |
|        |         | Sevuparin/DF02+Malanil | 2   | Normal | Normal | Normal |                | Normal | Normal | Normal | Normal |                               |
|        |         | Sevuparin/DF02+Malanil | 3   | Normal | Normal | Normal |                | Normal | Normal | Normal | Normal |                               |
|        |         | Sevuparin/DF02+Malanil | 4   | Normal | Normal | Normal |                | Normal | Normal | Normal | Normal |                               |
|        |         | Sevuparin/DF02+Malanil | 7   | Normal | Normal | Normal |                | Normal | Normal | Normal | Normal |                               |
|        |         | Sevuparin/DF02+Malanil | 14  | Normal | Normal | Normal |                | Normal | Normal | Normal | Normal |                               |
|        |         | Malanil                | 0   | Normal | Normal | Normal |                | Normal | Normal | Normal | Normal |                               |
|        |         | Malanil                | 2   | Normal | Normal | Normal |                | Normal | Normal | Normal | Normal |                               |
|        |         | Malanil                | 3   | Normal | Normal | Normal |                | Normal | Normal | Normal | Normal |                               |
|        |         | Malanil                | 4   | Normal | Normal | Normal |                | Normal | Normal | Normal | Normal |                               |
|        |         | Malanil                | 7   | Normal | Normal | Normal |                | Normal | Normal | Normal | Normal |                               |
|        |         | Sevuparin/DF02+Malanil | 0   | Normal | Normal | Normal |                | Normal | Normal | Normal | Normal |                               |
|        |         | Sevuparin/DF02+Malanil | 2   | Normal | Normal | Normal |                | Normal | Normal | Normal | Normal |                               |
|        |         | Sevuparin/DF02+Malanil | 3   | Normal | Normal | Normal |                | Normal | Normal | Normal | Normal |                               |
|        |         | Sevuparin/DF02+Malanil | 4   | Normal | Normal | Normal |                | Normal | Normal | Normal | Normal |                               |
|        |         | Sevuparin/DF02+Malanil | 7   | Normal | Normal | Normal |                | Normal | Normal | Normal | Normal |                               |
|        |         | Sevuparin/DF02+Malanil | 14  | Normal | Normal | Normal |                | Normal | Normal | Normal | Normal |                               |
|        |         | Sevuparin/DF02+Malanil | 0   | Normal | Normal | Normal |                | Normal | Normal | Normal | Normal |                               |
|        |         | Sevuparin/DF02+Malanil | 2   | Normal | Normal | Normal |                | Normal | Normal | Normal | Normal |                               |
|        |         | Sevuparin/DF02+Malanil | 3   | Normal | Normal | Normal |                | Normal | Normal | Normal | Normal |                               |
|        |         | Sevuparin/DF02+Malanil | 4   | Normal | Normal | Normal |                | Normal | Normal | Normal | Normal |                               |

TSM02 Individual subject listings part 2

CSR Appendix 16.2

| SUBJID | INITIAL | ARM                    | DAY | SKIN   | HEAD   | EYES   | EYES<br>DETAIL | EARS   | NOSE   | THROAT | NECK   | NECK<br>DETAIL |
|--------|---------|------------------------|-----|--------|--------|--------|----------------|--------|--------|--------|--------|----------------|
|        |         | Sevuparin/DF02+Malanil | 7   | Normal | Normal | Normal |                | Normal | Normal | Normal | Normal |                |
|        |         | Sevuparin/DF02+Malanil | 14  | Normal | Normal | Normal |                | Normal | Normal | Normal | Normal |                |
|        |         | Malanil                | 0   | Normal | Normal | Normal |                | Normal | Normal | Normal | Normal |                |
|        |         | Malanil                | 2   | Normal | Normal | Normal |                | Normal | Normal | Normal | Normal |                |
|        |         | Malanil                | 3   | Normal | Normal | Normal |                | Normal | Normal | Normal | Normal |                |
|        |         | Malanil                | 4   | Normal | Normal | Normal |                | Normal | Normal | Normal | Normal |                |
|        |         | Malanil                | 7   | Normal | Normal | Normal |                | Normal | Normal | Normal | Normal |                |
|        |         | Malanil                | 14  | Normal | Normal | Normal |                | Normal | Normal | Normal | Normal |                |
|        |         | Malanil                | 0   | Normal | Normal | Normal |                | Normal | Normal | Normal | Normal |                |
|        |         | Malanil                | 2   | Normal | Normal | Normal |                | Normal | Normal | Normal | Normal |                |
|        |         | Malanil                | 3   | Normal | Normal | Normal |                | Normal | Normal | Normal | Normal |                |
|        |         | Malanil                | 4   | Normal | Normal | Normal |                | Normal | Normal | Normal | Normal |                |
|        |         | Malanil                | 7   | Normal | Normal | Normal |                | Normal | Normal | Normal | Normal |                |
|        |         | Malanil                | 14  | Normal | Normal | Normal |                | Normal | Normal | Normal | Normal |                |
|        |         | Sevuparin/DF02+Malanil | 0   | Normal | Normal | Normal |                | Normal | Normal | Normal | Normal |                |
|        |         | Sevuparin/DF02+Malanil | 2   | Normal | Normal | Normal |                | Normal | Normal | Normal | Normal |                |
|        |         | Sevuparin/DF02+Malanil | 3   | Normal | Normal | Normal |                | Normal | Normal | Normal | Normal |                |
|        |         | Sevuparin/DF02+Malanil | 4   | Normal | Normal | Normal |                | Normal | Normal | Normal | Normal |                |
|        |         | Sevuparin/DF02+Malanil | 7   | Normal | Normal | Normal |                | Normal | Normal | Normal | Normal |                |
|        |         | Sevuparin/DF02+Malanil | 0   | Normal | Normal | Normal |                | Normal | Normal | Normal | Normal |                |
|        |         | Sevuparin/DF02+Malanil | 2   | Normal | Normal | Normal |                | Normal | Normal | Normal | Normal |                |
|        |         | Sevuparin/DF02+Malanil | 3   | Normal | Normal | Normal |                | Normal | Normal | Normal | Normal |                |
|        |         | Sevuparin/DF02+Malanil | 4   | Normal | Normal | Normal |                | Normal | Normal | Normal | Normal |                |

TSM02 Individual subject listings part 2

CSR Appendix 16.2

| SUBJID | INITIAL | ARM                    | DAY | SKIN   | HEAD   | EYES   | EYES<br>DETAIL | EARS   | NOSE   | THROAT | NECK   | NECK<br>DETAIL |
|--------|---------|------------------------|-----|--------|--------|--------|----------------|--------|--------|--------|--------|----------------|
|        |         | Sevuparin/DF02+Malanil | 7   | Normal | Normal | Normal |                | Normal | Normal | Normal | Normal |                |
|        |         | Sevuparin/DF02+Malanil | 14  | Normal | Normal | Normal |                | Normal | Normal | Normal | Normal |                |
|        |         | Malanil                | 0   | Normal | Normal | Normal |                | Normal | Normal | Normal | Normal |                |
|        |         | Malanil                | 2   | Normal | Normal | Normal |                | Normal | Normal | Normal | Normal |                |
|        |         | Malanil                | 3   | Normal | Normal | Normal |                | Normal | Normal | Normal | Normal |                |
|        |         | Malanil                | 4   | Normal | Normal | Normal |                | Normal | Normal | Normal | Normal |                |
|        |         | Malanil                | 7   | Normal | Normal | Normal |                | Normal | Normal | Normal | Normal |                |
|        |         | Malanil                | 14  | Normal | Normal | Normal |                | Normal | Normal | Normal | Normal |                |
|        |         | Malanil                | 0   | Normal | Normal | Normal |                | Normal | Normal | Normal | Normal |                |
|        |         | Malanil                | 2   | Normal | Normal | Normal |                | Normal | Normal | Normal | Normal |                |
|        |         | Malanil                | 3   | Normal | Normal | Normal |                | Normal | Normal | Normal | Normal |                |
|        |         | Malanil                | 4   | Normal | Normal | Normal |                | Normal | Normal | Normal | Normal |                |
|        |         | Malanil                | 7   | Normal | Normal | Normal |                | Normal | Normal | Normal | Normal |                |
|        |         | Malanil                | 14  | Normal | Normal | Normal |                | Normal | Normal | Normal | Normal |                |
|        |         | Malanil                | 0   | Normal | Normal | Normal |                | Normal | Normal | Normal | Normal |                |
|        |         | Malanil                | 2   | Normal | Normal | Normal |                | Normal | Normal | Normal | Normal |                |
|        |         | Malanil                | 3   | Normal | Normal | Normal |                | Normal | Normal | Normal | Normal |                |
|        |         | Malanil                | 4   | Normal | Normal | Normal |                | Normal | Normal | Normal | Normal |                |
|        |         | Malanil                | 7   | Normal | Normal | Normal |                | Normal | Normal | Normal | Normal |                |
|        |         | Malanil                | 14  | Normal | Normal | Normal |                | Normal | Normal | Normal | Normal |                |
|        |         | Sevuparin/DF02+Malanil | 0   | Normal | Normal | Normal |                | Normal | Normal | Normal | Normal |                |
|        |         | Sevuparin/DF02+Malanil | 2   | Normal | Normal | Normal |                | Normal | Normal | Normal | Normal |                |
|        |         | Sevuparin/DF02+Malanil | 3   | Normal | Normal | Normal |                | Normal | Normal | Normal | Normal |                |

TSM02 Individual subject listings part 2

CSR Appendix 16.2

| SUBJID | INITIAL | ARM                    | DAY | SKIN   | HEAD   | EYES   | EYES<br>DETAIL | EARS   | NOSE   | THROAT | NECK   | NECK<br>DETAIL |
|--------|---------|------------------------|-----|--------|--------|--------|----------------|--------|--------|--------|--------|----------------|
|        |         | Sevuparin/DF02+Malanil | 4   | Normal | Normal | Normal |                | Normal | Normal | Normal | Normal |                |
|        |         | Sevuparin/DF02+Malanil | 7   | Normal | Normal | Normal |                | Normal | Normal | Normal | Normal |                |
|        |         | Sevuparin/DF02+Malanil | 14  | Normal | Normal | Normal |                | Normal | Normal | Normal | Normal |                |
|        |         | Sevuparin/DF02+Malanil | 0   | Normal | Normal | Normal |                | Normal | Normal | Normal | Normal |                |
|        |         | Sevuparin/DF02+Malanil | 2   | Normal | Normal | Normal |                | Normal | Normal | Normal | Normal |                |
|        |         | Sevuparin/DF02+Malanil | 3   | Normal | Normal | Normal |                | Normal | Normal | Normal | Normal |                |
|        |         | Sevuparin/DF02+Malanil | 4   | Normal | Normal | Normal |                | Normal | Normal | Normal | Normal |                |
|        |         | Sevuparin/DF02+Malanil | 7   | Normal | Normal | Normal |                | Normal | Normal | Normal | Normal |                |
|        |         | Sevuparin/DF02+Malanil | 14  | Normal | Normal | Normal |                | Normal | Normal | Normal | Normal |                |
|        |         | Sevuparin/DF02+Malanil | 0   | Normal | Normal | Normal |                | Normal | Normal | Normal | Normal |                |
|        |         | Sevuparin/DF02+Malanil | 2   | Normal | Normal | Normal |                | Normal | Normal | Normal | Normal |                |
|        |         | Sevuparin/DF02+Malanil | 3   | Normal | Normal | Normal |                | Normal | Normal | Normal | Normal |                |
|        |         | Sevuparin/DF02+Malanil | 4   | Normal | Normal | Normal |                | Normal | Normal | Normal | Normal |                |
|        |         | Sevuparin/DF02+Malanil | 7   | Normal | Normal | Normal |                | Normal | Normal | Normal | Normal |                |
|        |         | Sevuparin/DF02+Malanil | 14  | Normal | Normal | Normal |                | Normal | Normal | Normal | Normal |                |
|        |         | Malanil                | 0   | Normal | Normal | Normal |                | Normal | Normal | Normal | Normal |                |
|        |         | Malanil                | 2   | Normal | Normal | Normal |                | Normal | Normal | Normal | Normal |                |
|        |         | Malanil                | 3   | Normal | Normal | Normal |                | Normal | Normal | Normal | Normal |                |
|        |         | Malanil                | 4   | Normal | Normal | Normal |                | Normal | Normal | Normal | Normal |                |
|        |         | Malanil                | 7   | Normal | Normal | Normal |                | Normal | Normal | Normal | Normal |                |
|        |         | Malanil                | 14  | Normal | Normal | Normal |                | Normal | Normal | Normal | Normal |                |
|        |         | Sevuparin/DF02+Malanil | 0   | Normal | Normal | Normal |                | Normal | Normal | Normal | Normal |                |
|        |         | Sevuparin/DF02+Malanil | 2   | Normal | Normal | Normal |                | Normal | Normal | Normal | Normal |                |

TSM02 Individual subject listings part 2

CSR Appendix 16.2

| SUBJID | INITIAL | ARM                    | DAY | SKIN   | HEAD   | EYES     | EYES<br>DETAIL        | EARS   | NOSE   | THROAT | NECK   | NECK<br>DETAIL |
|--------|---------|------------------------|-----|--------|--------|----------|-----------------------|--------|--------|--------|--------|----------------|
|        |         | Sevuparin/DF02+Malanil | 3   | Normal | Normal | Normal   |                       | Normal | Normal | Normal | Normal |                |
|        |         | Sevuparin/DF02+Malanil | 4   | Normal | Normal | Normal   |                       | Normal | Normal | Normal | Normal |                |
|        |         | Sevuparin/DF02+Malanil | 7   | Normal | Normal | Normal   |                       | Normal | Normal | Normal | Normal |                |
|        |         | Sevuparin/DF02+Malanil | 14  | Normal | Normal | Normal   |                       | Normal | Normal | Normal | Normal |                |
|        |         | Sevuparin/DF02+Malanil | 0   | Normal | Normal | Abnormal | MODERATE<br>JAUNDICE  | Normal | Normal | Normal | Normal |                |
|        |         | Sevuparin/DF02+Malanil | 2   | Normal | Normal | Abnormal | MILD<br>JAUNDICE      | Normal | Normal | Normal | Normal |                |
|        |         | Sevuparin/DF02+Malanil | 3   | Normal | Normal | Abnormal | MILD<br>JAUNDICE      | Normal | Normal | Normal | Normal |                |
|        |         | Sevuparin/DF02+Malanil | 4   | Normal | Normal | Normal   |                       | Normal | Normal | Normal | Normal |                |
|        |         | Sevuparin/DF02+Malanil | 7   | Normal | Normal | Normal   |                       | Normal | Normal | Normal | Normal |                |
|        |         | Sevuparin/DF02+Malanil | 14  | Normal | Normal | Normal   |                       | Normal | Normal | Normal | Normal |                |
|        |         | Sevuparin/DF02+Malanil | 0   | Normal | Normal | Normal   |                       | Normal | Normal | Normal | Normal |                |
|        |         | Sevuparin/DF02+Malanil | 2   | Normal | Normal | Normal   |                       | Normal | Normal | Normal | Normal |                |
|        |         | Sevuparin/DF02+Malanil | 3   | Normal | Normal | Normal   |                       | Normal | Normal | Normal | Normal |                |
|        |         | Sevuparin/DF02+Malanil | 4   | Normal | Normal | Normal   |                       | Normal | Normal | Normal | Normal |                |
|        |         | Sevuparin/DF02+Malanil | 7   | Normal | Normal | Normal   |                       | Normal | Normal | Normal | Normal |                |
|        |         | Sevuparin/DF02+Malanil | 14  | Normal | Normal | Normal   |                       | Normal | Normal | Normal | Normal |                |
|        |         | Sevuparin/DF02+Malanil | 0   | Normal | Normal | Abnormal | BLINDNESS<br>LEFT EYE | Normal | Normal | Normal | Normal |                |
|        |         | Sevuparin/DF02+Malanil | 2   | Normal | Normal | Abnormal | BLINDNESS<br>LEFT EYE | Normal | Normal | Normal | Normal |                |
|        |         | Sevuparin/DF02+Malanil | 3   | Normal | Normal | Abnormal | BLINDNESS<br>LEFT EYE | Normal | Normal | Normal | Normal |                |

TSM02 Individual subject listings part 2

CSR Appendix 16.2

| SUBJID | INITIAL | ARM                    | DAY | SKIN   | HEAD   | EYES     | EYES<br>DETAIL        | EARS   | NOSE   | THROAT | NECK   | NECK<br>DETAIL |
|--------|---------|------------------------|-----|--------|--------|----------|-----------------------|--------|--------|--------|--------|----------------|
|        |         | Sevuparin/DF02+Malanil | 4   | Normal | Normal | Abnormal | BLINDNESS<br>LEFT EYE | Normal | Normal | Normal | Normal |                |
|        |         | Sevuparin/DF02+Malanil | 7   | Normal | Normal | Abnormal | BLINDNESS<br>LEFT EYE | Normal | Normal | Normal | Normal |                |
|        |         | Sevuparin/DF02+Malanil | 14  | Normal | Normal | Abnormal | BLINDNESS<br>LEFT EYE | Normal | Normal | Normal | Normal |                |
|        |         | Malanil                | 0   | Normal | Normal | Normal   |                       | Normal | Normal | Normal | Normal |                |
|        |         | Malanil                | 2   | Normal | Normal | Normal   |                       | Normal | Normal | Normal | Normal |                |
|        |         | Malanil                | 3   | Normal | Normal | Normal   |                       | Normal | Normal | Normal | Normal |                |
|        |         | Malanil                | 4   | Normal | Normal | Normal   |                       | Normal | Normal | Normal | Normal |                |
|        |         | Malanil                | 7   | Normal | Normal | Normal   |                       | Normal | Normal | Normal | Normal |                |
|        |         | Malanil                | 14  | Normal | Normal | Normal   |                       | Normal | Normal | Normal | Normal |                |
|        |         | Malanil                | 0   | Normal | Normal | Normal   |                       | Normal | Normal | Normal | Normal |                |
|        |         | Malanil                | 2   | Normal | Normal | Normal   |                       | Normal | Normal | Normal | Normal |                |
|        |         | Malanil                | 3   | Normal | Normal | Normal   |                       | Normal | Normal | Normal | Normal |                |
|        |         | Malanil                | 4   | Normal | Normal | Normal   |                       | Normal | Normal | Normal | Normal |                |
|        |         | Malanil                | 7   | Normal | Normal | Normal   |                       | Normal | Normal | Normal | Normal |                |
|        |         | Malanil                | 14  | Normal | Normal | Normal   |                       | Normal | Normal | Normal | Normal |                |
|        |         | Malanil                | 0   | Normal | Normal | Normal   |                       | Normal | Normal | Normal | Normal |                |
|        |         | Malanil                | 2   | Normal | Normal | Normal   |                       | Normal | Normal | Normal | Normal |                |
|        |         | Malanil                | 3   | Normal | Normal | Normal   |                       | Normal | Normal | Normal | Normal |                |
|        |         | Malanil                | 4   | Normal | Normal | Normal   |                       | Normal | Normal | Normal | Normal |                |
|        |         | Malanil                | 7   | Normal | Normal | Normal   |                       | Normal | Normal | Normal | Normal |                |
|        |         | Malanil                | 14  | Normal | Normal | Normal   |                       | Normal | Normal | Normal | Normal |                |



TSM02 Individual subject listings part 2

CSR Appendix 16.2

| SUBJID | INITIAL | ARM                    | DAY | SKIN   | HEAD   | EYES   | EYES<br>DETAIL | EARS   | NOSE   | THROAT | NECK   | NECK<br>DETAIL |
|--------|---------|------------------------|-----|--------|--------|--------|----------------|--------|--------|--------|--------|----------------|
|        |         | Sevuparin/DF02+Malanil | 0   | Normal | Normal | Normal |                | Normal | Normal | Normal | Normal |                |
|        |         | Sevuparin/DF02+Malanil | 2   | Normal | Normal | Normal |                | Normal | Normal | Normal | Normal |                |
|        |         | Sevuparin/DF02+Malanil | 3   | Normal | Normal | Normal |                | Normal | Normal | Normal | Normal |                |
|        |         | Sevuparin/DF02+Malanil | 4   | Normal | Normal | Normal |                | Normal | Normal | Normal | Normal |                |
|        |         | Sevuparin/DF02+Malanil | 7   | Normal | Normal | Normal |                | Normal | Normal | Normal | Normal |                |
|        |         | Sevuparin/DF02+Malanil | 14  | Normal | Normal | Normal |                | Normal | Normal | Normal | Normal |                |
|        |         | Malanil                | 0   | Normal | Normal | Normal |                | Normal | Normal | Normal | Normal |                |
|        |         | Malanil                | 2   | Normal | Normal | Normal |                | Normal | Normal | Normal | Normal |                |
|        |         | Malanil                | 3   | Normal | Normal | Normal |                | Normal | Normal | Normal | Normal |                |
|        |         | Malanil                | 4   | Normal | Normal | Normal |                | Normal | Normal | Normal | Normal |                |
|        |         | Malanil                | 7   | Normal | Normal | Normal |                | Normal | Normal | Normal | Normal |                |
|        |         | Malanil                | 14  | Normal | Normal | Normal |                | Normal | Normal | Normal | Normal |                |
|        |         | Malanil                | 0   | Normal | Normal | Normal |                | Normal | Normal | Normal | Normal |                |
|        |         | Malanil                | 2   | Normal | Normal | Normal |                | Normal | Normal | Normal | Normal |                |
|        |         | Malanil                | 3   | Normal | Normal | Normal |                | Normal | Normal | Normal | Normal |                |
|        |         | Malanil                | 4   | Normal | Normal | Normal |                | Normal | Normal | Normal | Normal |                |
|        |         | Malanil                | 7   | Normal | Normal | Normal |                | Normal | Normal | Normal | Normal |                |
|        |         | Malanil                | 14  | Normal | Normal | Normal |                | Normal | Normal | Normal | Normal |                |
|        |         | Malanil                | 0   | Normal | Normal | Normal |                | Normal | Normal | Normal | Normal |                |
|        |         | Malanil                | 2   | Normal | Normal | Normal |                | Normal | Normal | Normal | Normal |                |
|        |         | Malanil                | 3   | Normal | Normal | Normal |                | Normal | Normal | Normal | Normal |                |
|        |         | Malanil                | 4   | Normal | Normal | Normal |                | Normal | Normal | Normal | Normal |                |
|        |         | Malanil                | 7   | Normal | Normal | Normal |                | Normal | Normal | Normal | Normal |                |

TSM02 Individual subject listings part 2

CSR Appendix 16.2

| SUBJID | INITIAL | ARM                    | DAY | SKIN   | HEAD   | EYES   | EYES<br>DETAIL | EARS   | NOSE   | THROAT | NECK   | NECK<br>DETAIL |
|--------|---------|------------------------|-----|--------|--------|--------|----------------|--------|--------|--------|--------|----------------|
|        |         | Malanil                | 14  | Normal | Normal | Normal |                | Normal | Normal | Normal | Normal |                |
|        |         | Malanil                | 0   | Normal | Normal | Normal |                | Normal | Normal | Normal | Normal |                |
|        |         | Malanil                | 2   | Normal | Normal | Normal |                | Normal | Normal | Normal | Normal |                |
|        |         | Malanil                | 3   | Normal | Normal | Normal |                | Normal | Normal | Normal | Normal |                |
|        |         | Malanil                | 4   | Normal | Normal | Normal |                | Normal | Normal | Normal | Normal |                |
|        |         | Malanil                | 7   | Normal | Normal | Normal |                | Normal | Normal | Normal | Normal |                |
|        |         | Malanil                | 14  | Normal | Normal | Normal |                | Normal | Normal | Normal | Normal |                |
|        |         | Sevuparin/DF02+Malanil | 0   | Normal | Normal | Normal |                | Normal | Normal | Normal | Normal |                |
|        |         | Sevuparin/DF02+Malanil | 2   | Normal | Normal | Normal |                | Normal | Normal | Normal | Normal |                |
|        |         | Sevuparin/DF02+Malanil | 3   | Normal | Normal | Normal |                | Normal | Normal | Normal | Normal |                |
|        |         | Sevuparin/DF02+Malanil | 4   | Normal | Normal | Normal |                | Normal | Normal | Normal | Normal |                |
|        |         | Sevuparin/DF02+Malanil | 7   | Normal | Normal | Normal |                | Normal | Normal | Normal | Normal |                |
|        |         | Sevuparin/DF02+Malanil | 14  | Normal | Normal | Normal |                | Normal | Normal | Normal | Normal |                |
|        |         | Malanil                | 0   | Normal | Normal | Normal |                | Normal | Normal | Normal | Normal |                |
|        |         | Malanil                | 2   | Normal | Normal | Normal |                | Normal | Normal | Normal | Normal |                |
|        |         | Malanil                | 3   | Normal | Normal | Normal |                | Normal | Normal | Normal | Normal |                |
|        |         | Malanil                | 4   | Normal | Normal | Normal |                | Normal | Normal | Normal | Normal |                |
|        |         | Malanil                | 7   | Normal | Normal | Normal |                | Normal | Normal | Normal | Normal |                |
|        |         | Malanil                | 14  | Normal | Normal | Normal |                | Normal | Normal | Normal | Normal |                |
|        |         | Malanil                | 0   | Normal | Normal | Normal |                | Normal | Normal | Normal | Normal |                |
|        |         | Malanil                | 2   | Normal | Normal | Normal |                | Normal | Normal | Normal | Normal |                |
|        |         | Malanil                | 3   | Normal | Normal | Normal |                | Normal | Normal | Normal | Normal |                |
|        |         | Malanil                | 4   | Normal | Normal | Normal |                | Normal | Normal | Normal | Normal |                |

## TSM02 Individual subject listings part 2

## CSR Appendix 16.2

| SUBJID | INITIAL | ARM                    | DAY | SKIN   | HEAD   | EYES     | EYES<br>DETAIL | EARS   | NOSE   | THROAT | NECK   | NECK<br>DETAIL |
|--------|---------|------------------------|-----|--------|--------|----------|----------------|--------|--------|--------|--------|----------------|
|        |         | Malanil                | 7   | Normal | Normal | Normal   |                | Normal | Normal | Normal | Normal |                |
|        |         | Malanil                | 14  | Normal | Normal | Normal   |                | Normal | Normal | Normal | Normal |                |
|        |         | Malanil                | 0   | Normal | Normal | Normal   |                | Normal | Normal | Normal | Normal |                |
|        |         | Malanil                | 2   | Normal | Normal | Normal   |                | Normal | Normal | Normal | Normal |                |
|        |         | Malanil                | 3   | Normal | Normal | Normal   |                | Normal | Normal | Normal | Normal |                |
|        |         | Malanil                | 4   | Normal | Normal | Normal   |                | Normal | Normal | Normal | Normal |                |
|        |         | Malanil                | 7   | Normal | Normal | Normal   |                | Normal | Normal | Normal | Normal |                |
|        |         | Malanil                | 14  | Normal | Normal | Normal   |                | Normal | Normal | Normal | Normal |                |
|        |         | Sevuparin/DF02+Malanil | 0   | Normal | Normal | Abnormal | JAUNDICE       | Normal | Normal | Normal | Normal |                |
|        |         | Sevuparin/DF02+Malanil | 2   | Normal | Normal | Abnormal | JAUNDICE       | Normal | Normal | Normal | Normal |                |
|        |         | Sevuparin/DF02+Malanil | 3   | Normal | Normal | Abnormal | JAUNDICE       | Normal | Normal | Normal | Normal |                |
|        |         | Sevuparin/DF02+Malanil | 4   | Normal | Normal | Abnormal | JAUNDICE       | Normal | Normal | Normal | Normal |                |
|        |         | Sevuparin/DF02+Malanil | 7   | Normal | Normal | Normal   |                | Normal | Normal | Normal | Normal |                |
|        |         | Sevuparin/DF02+Malanil | 14  | Normal | Normal | Normal   |                | Normal | Normal | Normal | Normal |                |
|        |         | Sevuparin/DF02+Malanil | 0   | Normal | Normal | Normal   |                | Normal | Normal | Normal | Normal |                |
|        |         | Sevuparin/DF02+Malanil | 2   | Normal | Normal | Normal   |                | Normal | Normal | Normal | Normal |                |
|        |         | Sevuparin/DF02+Malanil | 3   | Normal | Normal | Normal   |                | Normal | Normal | Normal | Normal |                |
|        |         | Sevuparin/DF02+Malanil | 4   | Normal | Normal | Normal   |                | Normal | Normal | Normal | Normal |                |
|        |         | Sevuparin/DF02+Malanil | 7   | Normal | Normal | Normal   |                | Normal | Normal | Normal | Normal |                |
|        |         | Sevuparin/DF02+Malanil | 14  | Normal | Normal | Normal   |                | Normal | Normal | Normal | Normal |                |
|        |         | Sevuparin/DF02+Malanil | 0   | Normal | Normal | Normal   |                | Normal | Normal | Normal | Normal |                |
|        |         | Sevuparin/DF02+Malanil | 1   | Normal | Normal | Normal   |                | Normal | Normal | Normal | Normal |                |
|        |         | Sevuparin/DF02+Malanil | 2   | Normal | Normal | Normal   |                | Normal | Normal | Normal | Normal |                |

TSM02 Individual subject listings part 2

CSR Appendix 16.2

| SUBJID | INITIAL | ARM                    | DAY | SKIN   | HEAD   | EYES   | EYES<br>DETAIL | EARS   | NOSE   | THROAT | NECK   | NECK<br>DETAIL |
|--------|---------|------------------------|-----|--------|--------|--------|----------------|--------|--------|--------|--------|----------------|
|        |         | Sevuparin/DF02+Malanil | 3   | Normal | Normal | Normal |                | Normal | Normal | Normal | Normal |                |
|        |         | Sevuparin/DF02+Malanil | 4   | Normal | Normal | Normal |                | Normal | Normal | Normal | Normal |                |
|        |         | Sevuparin/DF02+Malanil | 7   | Normal | Normal | Normal |                | Normal | Normal | Normal | Normal |                |
|        |         | Sevuparin/DF02+Malanil | 14  | Normal | Normal | Normal |                | Normal | Normal | Normal | Normal |                |
|        |         | Sevuparin/DF02+Malanil | 0   | Normal | Normal | Normal |                | Normal | Normal | Normal | Normal |                |
|        |         | Sevuparin/DF02+Malanil | 2   | Normal | Normal | Normal |                | Normal | Normal | Normal | Normal |                |
|        |         | Sevuparin/DF02+Malanil | 3   | Normal | Normal | Normal |                | Normal | Normal | Normal | Normal |                |
|        |         | Sevuparin/DF02+Malanil | 4   | Normal | Normal | Normal |                | Normal | Normal | Normal | Normal |                |
|        |         | Sevuparin/DF02+Malanil | 7   | Normal | Normal | Normal |                | Normal | Normal | Normal | Normal |                |
|        |         | Sevuparin/DF02+Malanil | 14  | Normal | Normal | Normal |                | Normal | Normal | Normal | Normal |                |
|        |         | Sevuparin/DF02+Malanil | 0   | Normal | Normal | Normal |                | Normal | Normal | Normal | Normal |                |
|        |         | Sevuparin/DF02+Malanil | 2   | Normal | Normal | Normal |                | Normal | Normal | Normal | Normal |                |
|        |         | Sevuparin/DF02+Malanil | 3   | Normal | Normal | Normal |                | Normal | Normal | Normal | Normal |                |
|        |         | Sevuparin/DF02+Malanil | 4   | Normal | Normal | Normal |                | Normal | Normal | Normal | Normal |                |
|        |         | Sevuparin/DF02+Malanil | 7   | Normal | Normal | Normal |                | Normal | Normal | Normal | Normal |                |
|        |         | Sevuparin/DF02+Malanil | 14  | Normal | Normal | Normal |                | Normal | Normal | Normal | Normal |                |
|        |         | Malanil                | 0   | Normal | Normal | Normal |                | Normal | Normal | Normal | Normal |                |
|        |         | Malanil                | 2   | Normal | Normal | Normal |                | Normal | Normal | Normal | Normal |                |
|        |         | Malanil                | 3   | Normal | Normal | Normal |                | Normal | Normal | Normal | Normal |                |
|        |         | Malanil                | 4   | Normal | Normal | Normal |                | Normal | Normal | Normal | Normal |                |
|        |         | Malanil                | 7   | Normal | Normal | Normal |                | Normal | Normal | Normal | Normal |                |
|        |         | Malanil                | 14  | Normal | Normal | Normal |                | Normal | Normal | Normal | Normal |                |
|        |         | Malanil                | 0   | Normal | Normal | Normal |                | Normal | Normal | Normal | Normal |                |

TSM02 Individual subject listings part 2

CSR Appendix 16.2

| <b>SUBJID</b> | <b>INITIAL</b> | <b>ARM</b> | <b>DAY</b> | <b>SKIN</b> | <b>HEAD</b> | <b>EYES</b> | <b>EYES<br/>DETAIL</b> | <b>EARS</b> | <b>NOSE</b> | <b>THROAT</b> | <b>NECK</b> | <b>NECK<br/>DETAIL</b> |
|---------------|----------------|------------|------------|-------------|-------------|-------------|------------------------|-------------|-------------|---------------|-------------|------------------------|
|               |                | Malanil    | 2          | Normal      | Normal      | Normal      |                        | Normal      | Normal      | Normal        | Normal      |                        |
|               |                | Malanil    | 3          | Normal      | Normal      | Normal      |                        | Normal      | Normal      | Normal        | Normal      |                        |
|               |                | Malanil    | 4          | Normal      | Normal      | Normal      |                        | Normal      | Normal      | Normal        | Normal      |                        |
|               |                | Malanil    | 7          | Normal      | Normal      | Normal      |                        | Normal      | Normal      | Normal        | Normal      |                        |
|               |                | Malanil    | 14         | Normal      | Normal      | Normal      |                        | Normal      | Normal      | Normal        | Normal      |                        |
|               |                | Malanil    | 0          | Normal      | Normal      | Normal      |                        | Normal      | Normal      | Normal        | Normal      |                        |
|               |                | Malanil    | 2          | Normal      | Normal      | Normal      |                        | Normal      | Normal      | Normal        | Normal      |                        |
|               |                | Malanil    | 3          | Normal      | Normal      | Normal      |                        | Normal      | Normal      | Normal        | Normal      |                        |
|               |                | Malanil    | 4          | Normal      | Normal      | Normal      |                        | Normal      | Normal      | Normal        | Normal      |                        |
|               |                | Malanil    | 5          | Normal      | Normal      | Normal      |                        | Normal      | Normal      | Normal        | Normal      |                        |
|               |                | Malanil    | 7          | Normal      | Normal      | Normal      |                        | Normal      | Normal      | Normal        | Normal      |                        |
|               |                | Malanil    | 14         | Normal      | Normal      | Normal      |                        | Normal      | Normal      | Normal        | Normal      |                        |

TSM02 Individual subject listings part 2

CSR Appendix 16.2

16.2.7.3 Physical examination (including weight and height) (-continued)

| SUBJID | INITIAL | ARM                        | DAY | THYROID | THY<br>DETAIL | LUNG   | HEART  | ABDOMEN  | ABD<br>DETAIL     | LIVER<br>(cm) | SPLEEN<br>(cm) | LYMPH  | EXTREMITIES | CNS    |
|--------|---------|----------------------------|-----|---------|---------------|--------|--------|----------|-------------------|---------------|----------------|--------|-------------|--------|
|        |         | Malanil                    | 0   | Normal  |               | Normal | Normal | Abnormal |                   | 1             | 4              | Normal | Normal      | Normal |
|        |         | Malanil                    | 2   | Normal  |               | Normal | Normal | Abnormal | NO<br>SIGNIFICANT | 1             | 4              | Normal | Normal      | Normal |
|        |         | Malanil                    | 3   | Normal  |               | Normal | Normal | Abnormal | NO<br>SIGNIFICANT | 1             | 4              | Normal | Normal      | Normal |
|        |         | Malanil                    | 4   | Normal  |               | Normal | Normal | Abnormal | NO<br>SIGNIFICANT | 1             | 4              | Normal | Normal      | Normal |
|        |         | Sevuparin/DF02<br>+Malanil | 0   | Normal  |               | Normal | Normal | Normal   |                   |               |                | Normal | Normal      | Normal |
|        |         | Sevuparin/DF02<br>+Malanil | 2   | Normal  |               | Normal | Normal | Normal   |                   |               |                | Normal | Normal      | Normal |
|        |         | Sevuparin/DF02<br>+Malanil | 3   | Normal  |               | Normal | Normal | Normal   |                   |               |                | Normal | Normal      | Normal |
|        |         | Sevuparin/DF02<br>+Malanil | 4   | Normal  |               | Normal | Normal | Normal   |                   |               |                | Normal | Normal      | Normal |
|        |         | Sevuparin/DF02<br>+Malanil | 7   | Normal  |               | Normal | Normal | Normal   |                   |               |                | Normal | Normal      | Normal |
|        |         | Sevuparin/DF02<br>+Malanil | 14  | Normal  |               | Normal | Normal | Normal   |                   |               |                | Normal | Normal      | Normal |
|        |         | Sevuparin/DF02<br>+Malanil | 0   | Normal  |               | Normal | Normal | Normal   |                   |               |                | Normal | Normal      | Normal |
|        |         | Sevuparin/DF02<br>+Malanil | 2   | Normal  |               | Normal | Normal | Normal   |                   |               |                | Normal | Normal      | Normal |
|        |         | Sevuparin/DF02<br>+Malanil | 3   | Normal  |               | Normal | Normal | Normal   |                   |               |                | Normal | Normal      | Normal |
|        |         | Sevuparin/DF02             | 4   | Normal  |               | Normal | Normal | Normal   |                   |               |                | Normal | Normal      | Normal |

TSM02 Individual subject listings part 2

CSR Appendix 16.2

| SUBJID | INITIAL | ARM                        | DAY | THYROID  | THY<br>DETAIL                             | LUNG   | HEART  | ABDOMEN | ABD DETAIL | LIVER<br>(cm) | SPLEEN<br>(cm) | LYMPH  | EXTREMITIES | CNS    |
|--------|---------|----------------------------|-----|----------|-------------------------------------------|--------|--------|---------|------------|---------------|----------------|--------|-------------|--------|
|        |         | +Malanil                   |     |          |                                           |        |        |         |            |               |                |        |             |        |
|        |         | Sevuparin/DF02<br>+Malanil | 7   | Normal   |                                           | Normal | Normal | Normal  |            |               |                | Normal | Normal      | Normal |
|        |         | Sevuparin/DF02<br>+Malanil | 14  | Normal   |                                           | Normal | Normal | Normal  |            |               |                | Normal | Normal      | Normal |
|        |         | Malanil                    | 0   | Abnormal | THYROID<br>GRAD II<br>DIAMETER<br>6CM     | Normal | Normal | Normal  |            |               |                | Normal | Normal      | Normal |
|        |         | Malanil                    | 2   | Abnormal | THYROID<br>GRAD II<br>DIAMETER<br>6CM-NSC | Normal | Normal | Normal  |            |               |                | Normal | Normal      | Normal |
|        |         | Malanil                    | 3   | Abnormal | THYROID<br>GRAD II<br>DIAMETER<br>6CM-NSC | Normal | Normal | Normal  |            |               |                | Normal | Normal      | Normal |
|        |         | Malanil                    | 4   | Abnormal | THYROID<br>GRAD II<br>DIAMETER<br>6CM     | Normal | Normal | Normal  |            |               |                | Normal | Normal      | Normal |
|        |         | Malanil                    | 7   | Abnormal | THYROID<br>GRAD II<br>DIAMETER<br>6CM-NSC | Normal | Normal | Normal  |            |               |                | Normal | Normal      | Normal |
|        |         | Malanil                    | 14  | Abnormal | THYROID<br>GRAD II<br>DIAMETER<br>6CM-NSC | Normal | Normal | Normal  |            |               |                | Normal | Normal      | Normal |
|        |         | Malanil                    | 0   | Normal   |                                           | Normal | Normal | Normal  |            |               |                | Normal | Normal      | Normal |

## TSM02 Individual subject listings part 2

## CSR Appendix 16.2

| SUBJID | INITIAL | ARM                        | DAY | THYROID | THY<br>DETAIL | LUNG   | HEART  | ABDOMEN | ABD DETAIL | LIVER<br>(cm) | SPLEEN<br>(cm) | LYMPH  | EXTREMITIES | CNS    |
|--------|---------|----------------------------|-----|---------|---------------|--------|--------|---------|------------|---------------|----------------|--------|-------------|--------|
|        |         | Malanil                    | 2   | Normal  |               | Normal | Normal | Normal  |            |               |                | Normal | Normal      | Normal |
|        |         | Malanil                    | 3   | Normal  |               | Normal | Normal | Normal  |            |               |                | Normal | Normal      | Normal |
|        |         | Malanil                    | 4   | Normal  |               | Normal | Normal | Normal  |            |               |                | Normal | Normal      | Normal |
|        |         | Malanil                    | 7   | Normal  |               | Normal | Normal | Normal  |            |               |                | Normal | Normal      | Normal |
|        |         | Malanil                    | 14  | Normal  |               | Normal | Normal | Normal  |            |               |                | Normal | Normal      | Normal |
|        |         | Sevuparin/DF02<br>+Malanil | 0   | Normal  |               | Normal | Normal | Normal  |            |               |                | Normal | Normal      | Normal |
|        |         | Sevuparin/DF02<br>+Malanil | 2   | Normal  |               | Normal | Normal | Normal  |            |               |                | Normal | Normal      | Normal |
|        |         | Sevuparin/DF02<br>+Malanil | 3   | Normal  |               | Normal | Normal | Normal  |            |               |                | Normal | Normal      | Normal |
|        |         | Sevuparin/DF02<br>+Malanil | 4   | Normal  |               | Normal | Normal | Normal  |            |               |                | Normal | Normal      | Normal |
|        |         | Sevuparin/DF02<br>+Malanil | 7   | Normal  |               | Normal | Normal | Normal  |            |               |                | Normal | Normal      | Normal |
|        |         | Sevuparin/DF02<br>+Malanil | 14  | Normal  |               | Normal | Normal | Normal  |            |               |                | Normal | Normal      | Normal |
|        |         | Malanil                    | 0   | Normal  |               | Normal | Normal | Normal  |            |               |                | Normal | Normal      | Normal |
|        |         | Malanil                    | 2   | Normal  |               | Normal | Normal | Normal  |            |               |                | Normal | Normal      | Normal |
|        |         | Malanil                    | 3   | Normal  |               | Normal | Normal | Normal  |            |               |                | Normal | Normal      | Normal |
|        |         | Malanil                    | 4   | Normal  |               | Normal | Normal | Normal  |            |               |                | Normal | Normal      | Normal |
|        |         | Malanil                    | 7   | Normal  |               | Normal | Normal | Normal  |            |               |                | Normal | Normal      | Normal |
|        |         | Sevuparin/DF02<br>+Malanil | 0   | Normal  |               | Normal | Normal | Normal  |            |               |                | Normal | Normal      | Normal |
|        |         | Sevuparin/DF02<br>+Malanil | 2   | Normal  |               | Normal | Normal | Normal  |            |               |                | Normal | Normal      | Normal |



TSM02 Individual subject listings part 2

CSR Appendix 16.2

| SUBJID | INITIAL | ARM                        | DAY | THYROID | THY<br>DETAIL | LUNG   | HEART  | ABDOMEN | ABD DETAIL | LIVER<br>(cm) | SPLEEN<br>(cm) | LYMPH  | EXTREMITIES | CNS    |
|--------|---------|----------------------------|-----|---------|---------------|--------|--------|---------|------------|---------------|----------------|--------|-------------|--------|
|        |         | Sevuparin/DF02<br>+Malanil | 3   | Normal  |               | Normal | Normal | Normal  |            |               |                | Normal | Normal      | Normal |
|        |         | Sevuparin/DF02<br>+Malanil | 4   | Normal  |               | Normal | Normal | Normal  |            |               |                | Normal | Normal      | Normal |
|        |         | Sevuparin/DF02<br>+Malanil | 7   | Normal  |               | Normal | Normal | Normal  |            |               |                | Normal | Normal      | Normal |
|        |         | Sevuparin/DF02<br>+Malanil | 14  | Normal  |               | Normal | Normal | Normal  |            |               |                | Normal | Normal      | Normal |
|        |         | Sevuparin/DF02<br>+Malanil | 0   | Normal  |               | Normal | Normal | Normal  |            |               |                | Normal | Normal      | Normal |
|        |         | Sevuparin/DF02<br>+Malanil | 2   | Normal  |               | Normal | Normal | Normal  |            |               |                | Normal | Normal      | Normal |
|        |         | Sevuparin/DF02<br>+Malanil | 3   | Normal  |               | Normal | Normal | Normal  |            |               |                | Normal | Normal      | Normal |
|        |         | Sevuparin/DF02<br>+Malanil | 4   | Normal  |               | Normal | Normal | Normal  |            |               |                | Normal | Normal      | Normal |
|        |         | Sevuparin/DF02<br>+Malanil | 7   | Normal  |               | Normal | Normal | Normal  |            |               |                | Normal | Normal      | Normal |
|        |         | Sevuparin/DF02<br>+Malanil | 14  | Normal  |               | Normal | Normal | Normal  |            |               |                | Normal | Normal      | Normal |
|        |         | Malanil                    | 0   | Normal  |               | Normal | Normal | Normal  |            |               |                | Normal | Normal      | Normal |
|        |         | Malanil                    | 2   | Normal  |               | Normal | Normal | Normal  |            |               |                | Normal | Normal      | Normal |
|        |         | Malanil                    | 3   | Normal  |               | Normal | Normal | Normal  |            |               |                | Normal | Normal      | Normal |
|        |         | Malanil                    | 4   | Normal  |               | Normal | Normal | Normal  |            |               |                | Normal | Normal      | Normal |
|        |         | Malanil                    | 7   | Normal  |               | Normal | Normal | Normal  |            |               |                | Normal | Normal      | Normal |
|        |         | Malanil                    | 14  | Normal  |               | Normal | Normal | Normal  |            |               |                | Normal | Normal      | Normal |

## TSM02 Individual subject listings part 2

## CSR Appendix 16.2

| SUBJID | INITIAL | ARM                        | DAY | THYROID | THY<br>DETAIL | LUNG   | HEART  | ABDOMEN  | ABD DETAIL | LIVER<br>(cm) | SPLEEN<br>(cm) | LYMPH  | EXTREMITIES | CNS    |
|--------|---------|----------------------------|-----|---------|---------------|--------|--------|----------|------------|---------------|----------------|--------|-------------|--------|
|        |         | Malanil                    | 0   | Normal  |               | Normal | Normal | Abnormal |            |               | 2              | Normal | Normal      | Normal |
|        |         | Malanil                    | 2   | Normal  |               | Normal | Normal | Abnormal |            |               | 2              | Normal | Normal      | Normal |
|        |         | Malanil                    | 3   | Normal  |               | Normal | Normal | Abnormal |            |               | 2              | Normal | Normal      | Normal |
|        |         | Malanil                    | 4   | Normal  |               | Normal | Normal | Abnormal |            |               | 2              | Normal | Normal      | Normal |
|        |         | Malanil                    | 7   | Normal  |               | Normal | Normal | Abnormal |            |               | 2              | Normal | Normal      | Normal |
|        |         | Malanil                    | 14  | Normal  |               | Normal | Normal | Abnormal |            |               | 2              | Normal | Normal      | Normal |
|        |         | Sevuparin/DF02<br>+Malanil | 0   | Normal  |               | Normal | Normal | Normal   |            |               |                | Normal | Normal      | Normal |
|        |         | Sevuparin/DF02<br>+Malanil | 2   | Normal  |               | Normal | Normal | Normal   |            |               |                | Normal | Normal      | Normal |
|        |         | Sevuparin/DF02<br>+Malanil | 3   | Normal  |               | Normal | Normal | Normal   |            |               |                | Normal | Normal      | Normal |
|        |         | Sevuparin/DF02<br>+Malanil | 4   | Normal  |               | Normal | Normal | Normal   |            |               |                | Normal | Normal      | Normal |
|        |         | Sevuparin/DF02<br>+Malanil | 7   | Normal  |               | Normal | Normal | Normal   |            |               |                | Normal | Normal      | Normal |
|        |         | Sevuparin/DF02<br>+Malanil | 0   | Normal  |               | Normal | Normal | Abnormal |            |               | 4              | Normal | Normal      | Normal |
|        |         | Sevuparin/DF02<br>+Malanil | 2   | Normal  |               | Normal | Normal | Abnormal |            |               | 4              | Normal | Normal      | Normal |
|        |         | Sevuparin/DF02<br>+Malanil | 3   | Normal  |               | Normal | Normal | Abnormal |            |               | 4              | Normal | Normal      | Normal |
|        |         | Sevuparin/DF02<br>+Malanil | 4   | Normal  |               | Normal | Normal | Abnormal |            |               | 4              | Normal | Normal      | Normal |
|        |         | Sevuparin/DF02<br>+Malanil | 7   | Normal  |               | Normal | Normal | Abnormal |            |               | 4              | Normal | Normal      | Normal |

## TSM02 Individual subject listings part 2

## CSR Appendix 16.2

| SUBJID | INITIAL | ARM                        | DAY | THYROID | THY<br>DETAIL | LUNG   | HEART  | ABDOMEN  | ABD DETAIL | LIVER<br>(cm) | SPLEEN<br>(cm) | LYMPH  | EXTREMITIES | CNS    |
|--------|---------|----------------------------|-----|---------|---------------|--------|--------|----------|------------|---------------|----------------|--------|-------------|--------|
|        |         | Sevuparin/DF02<br>+Malanil | 14  | Normal  |               | Normal | Normal | Abnormal |            |               | 4              | Normal | Normal      | Normal |
|        |         | Malanil                    | 0   | Normal  |               | Normal | Normal | Normal   |            |               |                | Normal | Normal      | Normal |
|        |         | Malanil                    | 2   | Normal  |               | Normal | Normal | Normal   |            |               |                | Normal | Normal      | Normal |
|        |         | Malanil                    | 3   | Normal  |               | Normal | Normal | Normal   |            |               |                | Normal | Normal      | Normal |
|        |         | Malanil                    | 4   | Normal  |               | Normal | Normal | Normal   |            |               |                | Normal | Normal      | Normal |
|        |         | Malanil                    | 7   | Normal  |               | Normal | Normal | Normal   |            |               |                | Normal | Normal      | Normal |
|        |         | Malanil                    | 14  | Normal  |               | Normal | Normal | Normal   |            |               |                | Normal | Normal      | Normal |
|        |         | Malanil                    | 0   | Normal  |               | Normal | Normal | Normal   |            |               |                | Normal | Normal      | Normal |
|        |         | Malanil                    | 2   | Normal  |               | Normal | Normal | Normal   |            |               |                | Normal | Normal      | Normal |
|        |         | Malanil                    | 3   | Normal  |               | Normal | Normal | Normal   |            |               |                | Normal | Normal      | Normal |
|        |         | Malanil                    | 4   | Normal  |               | Normal | Normal | Normal   |            |               |                | Normal | Normal      | Normal |
|        |         | Malanil                    | 7   | Normal  |               | Normal | Normal | Normal   |            |               |                | Normal | Normal      | Normal |
|        |         | Malanil                    | 14  | Normal  |               | Normal | Normal | Normal   |            |               |                | Normal | Normal      | Normal |
|        |         | Malanil                    | 0   | Normal  |               | Normal | Normal | Normal   |            |               |                | Normal | Normal      | Normal |
|        |         | Malanil                    | 2   | Normal  |               | Normal | Normal | Normal   |            |               |                | Normal | Normal      | Normal |
|        |         | Malanil                    | 3   | Normal  |               | Normal | Normal | Normal   |            |               |                | Normal | Normal      | Normal |
|        |         | Malanil                    | 4   | Normal  |               | Normal | Normal | Normal   |            |               |                | Normal | Normal      | Normal |
|        |         | Malanil                    | 7   | Normal  |               | Normal | Normal | Normal   |            |               |                | Normal | Normal      | Normal |
|        |         | Malanil                    | 14  | Normal  |               | Normal | Normal | Normal   |            |               |                | Normal | Normal      | Normal |
|        |         | Sevuparin/DF02<br>+Malanil | 0   | Normal  |               | Normal | Normal | Normal   |            |               |                | Normal | Normal      | Normal |
|        |         | Sevuparin/DF02<br>+Malanil | 2   | Normal  |               | Normal | Normal | Normal   |            |               |                | Normal | Normal      | Normal |

TSM02 Individual subject listings part 2

CSR Appendix 16.2

| SUBJID | INITIAL | ARM                        | DAY | THYROID | THY<br>DETAIL | LUNG   | HEART  | ABDOMEN  | ABD DETAIL                  | LIVER<br>(cm) | SPLEEN<br>(cm) | LYMPH  | EXTREMITIES | CNS    |
|--------|---------|----------------------------|-----|---------|---------------|--------|--------|----------|-----------------------------|---------------|----------------|--------|-------------|--------|
|        |         | Sevuparin/DF02<br>+Malanil | 3   | Normal  |               | Normal | Normal | Normal   |                             |               |                | Normal | Normal      | Normal |
|        |         | Sevuparin/DF02<br>+Malanil | 4   | Normal  |               | Normal | Normal | Normal   |                             |               |                | Normal | Normal      | Normal |
|        |         | Sevuparin/DF02<br>+Malanil | 7   | Normal  |               | Normal | Normal | Normal   |                             |               |                | Normal | Normal      | Normal |
|        |         | Sevuparin/DF02<br>+Malanil | 14  | Normal  |               | Normal | Normal | Normal   |                             |               |                | Normal | Normal      | Normal |
|        |         | Sevuparin/DF02<br>+Malanil | 0   | Normal  |               | Normal | Normal | Normal   |                             |               |                | Normal | Normal      | Normal |
|        |         | Sevuparin/DF02<br>+Malanil | 2   | Normal  |               | Normal | Normal | Normal   |                             |               |                | Normal | Normal      | Normal |
|        |         | Sevuparin/DF02<br>+Malanil | 3   | Normal  |               | Normal | Normal | Normal   |                             |               |                | Normal | Normal      | Normal |
|        |         | Sevuparin/DF02<br>+Malanil | 4   | Normal  |               | Normal | Normal | Normal   |                             |               |                | Normal | Normal      | Normal |
|        |         | Sevuparin/DF02<br>+Malanil | 7   | Normal  |               | Normal | Normal | Normal   |                             |               |                | Normal | Normal      | Normal |
|        |         | Sevuparin/DF02<br>+Malanil | 14  | Normal  |               | Normal | Normal | Normal   |                             |               |                | Normal | Normal      | Normal |
|        |         | Sevuparin/DF02<br>+Malanil | 0   | Normal  |               | Normal | Normal | Abnormal | SOFT MILD<br>TENDERNES<br>S |               |                | Normal | Normal      | Normal |
|        |         | Sevuparin/DF02<br>+Malanil | 2   | Normal  |               | Normal | Normal | Normal   |                             |               |                | Normal | Normal      | Normal |
|        |         | Sevuparin/DF02<br>+Malanil | 3   | Normal  |               | Normal | Normal | Normal   |                             |               |                | Normal | Normal      | Normal |
|        |         | Sevuparin/DF02<br>+Malanil | 4   | Normal  |               | Normal | Normal | Normal   |                             |               |                | Normal | Normal      | Normal |

## TSM02 Individual subject listings part 2

## CSR Appendix 16.2

| SUBJID | INITIAL | ARM                        | DAY | THYROID | THY<br>DETAIL | LUNG   | HEART  | ABDOMEN | ABD DETAIL | LIVER<br>(cm) | SPLEEN<br>(cm) | LYMPH  | EXTREMITIES | CNS    |
|--------|---------|----------------------------|-----|---------|---------------|--------|--------|---------|------------|---------------|----------------|--------|-------------|--------|
|        |         | +Malanil                   |     |         |               |        |        |         |            |               |                |        |             |        |
|        |         | Sevuparin/DF02<br>+Malanil | 7   | Normal  |               | Normal | Normal | Normal  |            |               |                | Normal | Normal      | Normal |
|        |         | Sevuparin/DF02<br>+Malanil | 14  | Normal  |               | Normal | Normal | Normal  |            |               |                | Normal | Normal      | Normal |
|        |         | Malanil                    | 0   | Normal  |               | Normal | Normal | Normal  |            |               |                | Normal | Normal      | Normal |
|        |         | Malanil                    | 2   | Normal  |               | Normal | Normal | Normal  |            |               |                | Normal | Normal      | Normal |
|        |         | Malanil                    | 3   | Normal  |               | Normal | Normal | Normal  |            |               |                | Normal | Normal      | Normal |
|        |         | Malanil                    | 4   | Normal  |               | Normal | Normal | Normal  |            |               |                | Normal | Normal      | Normal |
|        |         | Malanil                    | 7   | Normal  |               | Normal | Normal | Normal  |            |               |                | Normal | Normal      | Normal |
|        |         | Malanil                    | 14  | Normal  |               | Normal | Normal | Normal  |            |               |                | Normal | Normal      | Normal |
|        |         | Sevuparin/DF02<br>+Malanil | 0   | Normal  |               | Normal | Normal | Normal  |            |               |                | Normal | Normal      | Normal |
|        |         | Sevuparin/DF02<br>+Malanil | 2   | Normal  |               | Normal | Normal | Normal  |            |               |                | Normal | Normal      | Normal |
|        |         | Sevuparin/DF02<br>+Malanil | 3   | Normal  |               | Normal | Normal | Normal  |            |               |                | Normal | Normal      | Normal |
|        |         | Sevuparin/DF02<br>+Malanil | 4   | Normal  |               | Normal | Normal | Normal  |            |               |                | Normal | Normal      | Normal |
|        |         | Sevuparin/DF02<br>+Malanil | 7   | Normal  |               | Normal | Normal | Normal  |            |               |                | Normal | Normal      | Normal |
|        |         | Sevuparin/DF02<br>+Malanil | 14  | Normal  |               | Normal | Normal | Normal  |            |               |                | Normal | Normal      | Normal |
|        |         | Sevuparin/DF02<br>+Malanil | 0   | Normal  |               | Normal | Normal | Normal  |            |               |                | Normal | Normal      | Normal |
|        |         | Sevuparin/DF02             | 2   | Normal  |               | Normal | Normal | Normal  |            |               |                | Normal | Normal      | Normal |

## TSM02 Individual subject listings part 2

## CSR Appendix 16.2

| SUBJID | INITIAL | ARM                        | DAY | THYROID | THY<br>DETAIL | LUNG   | HEART  | ABDOMEN  | ABD DETAIL | LIVER<br>(cm) | SPLEEN<br>(cm) | LYMPH  | EXTREMITIES | CNS    |
|--------|---------|----------------------------|-----|---------|---------------|--------|--------|----------|------------|---------------|----------------|--------|-------------|--------|
|        |         | +Malanil                   |     |         |               |        |        |          |            |               |                |        |             |        |
|        |         | Sevuparin/DF02<br>+Malanil | 3   | Normal  |               | Normal | Normal | Normal   |            |               |                | Normal | Normal      | Normal |
|        |         | Sevuparin/DF02<br>+Malanil | 4   | Normal  |               | Normal | Normal | Normal   |            |               |                | Normal | Normal      | Normal |
|        |         | Sevuparin/DF02<br>+Malanil | 7   | Normal  |               | Normal | Normal | Normal   |            |               |                | Normal | Normal      | Normal |
|        |         | Sevuparin/DF02<br>+Malanil | 14  | Normal  |               | Normal | Normal | Normal   |            |               |                | Normal | Normal      | Normal |
|        |         | Sevuparin/DF02<br>+Malanil | 0   | Normal  |               | Normal | Normal | Abnormal |            | 2             | 2              | Normal | Normal      | Normal |
|        |         | Sevuparin/DF02<br>+Malanil | 2   | Normal  |               | Normal | Normal | Abnormal |            | 2             | 2              | Normal | Normal      | Normal |
|        |         | Sevuparin/DF02<br>+Malanil | 3   | Normal  |               | Normal | Normal | Abnormal |            | 2             | 2              | Normal | Normal      | Normal |
|        |         | Sevuparin/DF02<br>+Malanil | 4   | Normal  |               | Normal | Normal | Abnormal |            | 2             | 2              | Normal | Normal      | Normal |
|        |         | Sevuparin/DF02<br>+Malanil | 7   | Normal  |               | Normal | Normal | Abnormal |            | 2             | 2              | Normal | Normal      | Normal |
|        |         | Sevuparin/DF02<br>+Malanil | 14  | Normal  |               | Normal | Normal | Abnormal |            | 2             | 2              | Normal | Normal      | Normal |
|        |         | Sevuparin/DF02<br>+Malanil | 0   | Normal  |               | Normal | Normal | Normal   |            |               |                | Normal | Normal      | Normal |
|        |         | Sevuparin/DF02<br>+Malanil | 2   | Normal  |               | Normal | Normal | Normal   |            |               |                | Normal | Normal      | Normal |
|        |         | Sevuparin/DF02<br>+Malanil | 3   | Normal  |               | Normal | Normal | Normal   |            |               |                | Normal | Normal      | Normal |

TSM02 Individual subject listings part 2

CSR Appendix 16.2

| SUBJID | INITIAL | ARM                        | DAY | THYROID | THY<br>DETAIL | LUNG   | HEART  | ABDOMEN | ABD DETAIL | LIVER<br>(cm) | SPLEEN<br>(cm) | LYMPH  | EXTREMITIES | CNS    |
|--------|---------|----------------------------|-----|---------|---------------|--------|--------|---------|------------|---------------|----------------|--------|-------------|--------|
|        |         | Sevuparin/DF02<br>+Malanil | 4   | Normal  |               | Normal | Normal | Normal  |            |               |                | Normal | Normal      | Normal |
|        |         | Sevuparin/DF02<br>+Malanil | 7   | Normal  |               | Normal | Normal | Normal  |            |               |                | Normal | Normal      | Normal |
|        |         | Sevuparin/DF02<br>+Malanil | 14  | Normal  |               | Normal | Normal | Normal  |            |               |                | Normal | Normal      | Normal |
|        |         | Malanil                    | 0   | Normal  |               | Normal | Normal | Normal  |            |               |                | Normal | Normal      | Normal |
|        |         | Malanil                    | 2   | Normal  |               | Normal | Normal | Normal  |            |               |                | Normal | Normal      | Normal |
|        |         | Malanil                    | 3   | Normal  |               | Normal | Normal | Normal  |            |               |                | Normal | Normal      | Normal |
|        |         | Malanil                    | 4   | Normal  |               | Normal | Normal | Normal  |            |               |                | Normal | Normal      | Normal |
|        |         | Malanil                    | 7   | Normal  |               | Normal | Normal | Normal  |            |               |                | Normal | Normal      | Normal |
|        |         | Malanil                    | 14  | Normal  |               | Normal | Normal | Normal  |            |               |                | Normal | Normal      | Normal |
|        |         | Malanil                    | 0   | Normal  |               | Normal | Normal | Normal  |            |               |                | Normal | Normal      | Normal |
|        |         | Malanil                    | 2   | Normal  |               | Normal | Normal | Normal  |            |               |                | Normal | Normal      | Normal |
|        |         | Malanil                    | 3   | Normal  |               | Normal | Normal | Normal  |            |               |                | Normal | Normal      | Normal |
|        |         | Malanil                    | 4   | Normal  |               | Normal | Normal | Normal  |            |               |                | Normal | Normal      | Normal |
|        |         | Malanil                    | 7   | Normal  |               | Normal | Normal | Normal  |            |               |                | Normal | Normal      | Normal |
|        |         | Malanil                    | 14  | Normal  |               | Normal | Normal | Normal  |            |               |                | Normal | Normal      | Normal |
|        |         | Malanil                    | 0   | Normal  |               | Normal | Normal | Normal  |            |               |                | Normal | Normal      | Normal |
|        |         | Malanil                    | 2   | Normal  |               | Normal | Normal | Normal  |            |               |                | Normal | Normal      | Normal |
|        |         | Malanil                    | 3   | Normal  |               | Normal | Normal | Normal  |            |               |                | Normal | Normal      | Normal |
|        |         | Malanil                    | 4   | Normal  |               | Normal | Normal | Normal  |            |               |                | Normal | Normal      | Normal |
|        |         | Malanil                    | 7   | Normal  |               | Normal | Normal | Normal  |            |               |                | Normal | Normal      | Normal |
|        |         | Malanil                    | 14  | Normal  |               | Normal | Normal | Normal  |            |               |                | Normal | Normal      | Normal |

TSM02 Individual subject listings part 2

CSR Appendix 16.2

| SUBJID | INITIAL | ARM                        | DAY | THYROID | THY<br>DETAIL | LUNG   | HEART  | ABDOMEN | ABD DETAIL | LIVER<br>(cm) | SPLEEN<br>(cm) | LYMPH  | EXTREMITIES | CNS    |
|--------|---------|----------------------------|-----|---------|---------------|--------|--------|---------|------------|---------------|----------------|--------|-------------|--------|
|        |         | Sevuparin/DF02<br>+Malanil | 0   | Normal  |               | Normal | Normal | Normal  |            |               |                | Normal | Normal      | Normal |
|        |         | Sevuparin/DF02<br>+Malanil | 2   | Normal  |               | Normal | Normal | Normal  |            |               |                | Normal | Normal      | Normal |
|        |         | Sevuparin/DF02<br>+Malanil | 3   | Normal  |               | Normal | Normal | Normal  |            |               |                | Normal | Normal      | Normal |
|        |         | Sevuparin/DF02<br>+Malanil | 4   | Normal  |               | Normal | Normal | Normal  |            |               |                | Normal | Normal      | Normal |
|        |         | Sevuparin/DF02<br>+Malanil | 7   | Normal  |               | Normal | Normal | Normal  |            |               |                | Normal | Normal      | Normal |
|        |         | Sevuparin/DF02<br>+Malanil | 14  | Normal  |               | Normal | Normal | Normal  |            |               |                | Normal | Normal      | Normal |
|        |         | Malanil                    | 0   | Normal  |               | Normal | Normal | Normal  |            |               |                | Normal | Normal      | Normal |
|        |         | Malanil                    | 2   | Normal  |               | Normal | Normal | Normal  |            |               |                | Normal | Normal      | Normal |
|        |         | Malanil                    | 3   | Normal  |               | Normal | Normal | Normal  |            |               |                | Normal | Normal      | Normal |
|        |         | Malanil                    | 4   | Normal  |               | Normal | Normal | Normal  |            |               |                | Normal | Normal      | Normal |
|        |         | Malanil                    | 7   | Normal  |               | Normal | Normal | Normal  |            |               |                | Normal | Normal      | Normal |
|        |         | Malanil                    | 14  | Normal  |               | Normal | Normal | Normal  |            |               |                | Normal | Normal      | Normal |
|        |         | Malanil                    | 0   | Normal  |               | Normal | Normal | Normal  |            |               |                | Normal | Normal      | Normal |
|        |         | Malanil                    | 2   | Normal  |               | Normal | Normal | Normal  |            |               |                | Normal | Normal      | Normal |
|        |         | Malanil                    | 3   | Normal  |               | Normal | Normal | Normal  |            |               |                | Normal | Normal      | Normal |
|        |         | Malanil                    | 4   | Normal  |               | Normal | Normal | Normal  |            |               |                | Normal | Normal      | Normal |
|        |         | Malanil                    | 7   | Normal  |               | Normal | Normal | Normal  |            |               |                | Normal | Normal      | Normal |
|        |         | Malanil                    | 14  | Normal  |               | Normal | Normal | Normal  |            |               |                | Normal | Normal      | Normal |
|        |         | Malanil                    | 0   | Normal  |               | Normal | Normal | Normal  |            |               |                | Normal | Normal      | Normal |



## TSM02 Individual subject listings part 2

## CSR Appendix 16.2

| SUBJID | INITIAL | ARM                        | DAY | THYROID | THY<br>DETAIL | LUNG   | HEART  | ABDOMEN | ABD DETAIL | LIVER<br>(cm) | SPLEEN<br>(cm) | LYMPH  | EXTREMITIES | CNS    |
|--------|---------|----------------------------|-----|---------|---------------|--------|--------|---------|------------|---------------|----------------|--------|-------------|--------|
|        |         | Malanil                    | 2   | Normal  |               | Normal | Normal | Normal  |            |               |                | Normal | Normal      | Normal |
|        |         | Malanil                    | 3   | Normal  |               | Normal | Normal | Normal  |            |               |                | Normal | Normal      | Normal |
|        |         | Malanil                    | 4   | Normal  |               | Normal | Normal | Normal  |            |               |                | Normal | Normal      | Normal |
|        |         | Malanil                    | 7   | Normal  |               | Normal | Normal | Normal  |            |               |                | Normal | Normal      | Normal |
|        |         | Malanil                    | 14  | Normal  |               | Normal | Normal | Normal  |            |               |                | Normal | Normal      | Normal |
|        |         | Malanil                    | 0   | Normal  |               | Normal | Normal | Normal  |            |               |                | Normal | Normal      | Normal |
|        |         | Malanil                    | 2   | Normal  |               | Normal | Normal | Normal  |            |               |                | Normal | Normal      | Normal |
|        |         | Malanil                    | 3   | Normal  |               | Normal | Normal | Normal  |            |               |                | Normal | Normal      | Normal |
|        |         | Malanil                    | 4   | Normal  |               | Normal | Normal | Normal  |            |               |                | Normal | Normal      | Normal |
|        |         | Malanil                    | 7   | Normal  |               | Normal | Normal | Normal  |            |               |                | Normal | Normal      | Normal |
|        |         | Malanil                    | 14  | Normal  |               | Normal | Normal | Normal  |            |               |                | Normal | Normal      | Normal |
|        |         | Sevuparin/DF02<br>+Malanil | 0   | Normal  |               | Normal | Normal | Normal  |            |               |                | Normal | Normal      | Normal |
|        |         | Sevuparin/DF02<br>+Malanil | 2   | Normal  |               | Normal | Normal | Normal  |            |               |                | Normal | Normal      | Normal |
|        |         | Sevuparin/DF02<br>+Malanil | 3   | Normal  |               | Normal | Normal | Normal  |            |               |                | Normal | Normal      | Normal |
|        |         | Sevuparin/DF02<br>+Malanil | 4   | Normal  |               | Normal | Normal | Normal  |            |               |                | Normal | Normal      | Normal |
|        |         | Sevuparin/DF02<br>+Malanil | 7   | Normal  |               | Normal | Normal | Normal  |            |               |                | Normal | Normal      | Normal |
|        |         | Sevuparin/DF02<br>+Malanil | 14  | Normal  |               | Normal | Normal | Normal  |            |               |                | Normal | Normal      | Normal |
|        |         | Malanil                    | 0   | Normal  |               | Normal | Normal | Normal  |            |               |                | Normal | Normal      | Normal |
|        |         | Malanil                    | 2   | Normal  |               | Normal | Normal | Normal  |            |               |                | Normal | Normal      | Normal |

TSM02 Individual subject listings part 2

CSR Appendix 16.2

| SUBJID | INITIAL | ARM                        | DAY | THYROID | THY<br>DETAIL | LUNG   | HEART  | ABDOMEN | ABD DETAIL | LIVER<br>(cm) | SPLEEN<br>(cm) | LYMPH  | EXTREMITIES | CNS    |
|--------|---------|----------------------------|-----|---------|---------------|--------|--------|---------|------------|---------------|----------------|--------|-------------|--------|
|        |         | Malanil                    | 3   | Normal  |               | Normal | Normal | Normal  |            |               |                | Normal | Normal      | Normal |
|        |         | Malanil                    | 4   | Normal  |               | Normal | Normal | Normal  |            |               |                | Normal | Normal      | Normal |
|        |         | Malanil                    | 7   | Normal  |               | Normal | Normal | Normal  |            |               |                | Normal | Normal      | Normal |
|        |         | Malanil                    | 14  | Normal  |               | Normal | Normal | Normal  |            |               |                | Normal | Normal      | Normal |
|        |         | Malanil                    | 0   | Normal  |               | Normal | Normal | Normal  |            |               |                | Normal | Normal      | Normal |
|        |         | Malanil                    | 2   | Normal  |               | Normal | Normal | Normal  |            |               |                | Normal | Normal      | Normal |
|        |         | Malanil                    | 3   | Normal  |               | Normal | Normal | Normal  |            |               |                | Normal | Normal      | Normal |
|        |         | Malanil                    | 4   | Normal  |               | Normal | Normal | Normal  |            |               |                | Normal | Normal      | Normal |
|        |         | Malanil                    | 7   | Normal  |               | Normal | Normal | Normal  |            |               |                | Normal | Normal      | Normal |
|        |         | Malanil                    | 14  | Normal  |               | Normal | Normal | Normal  |            |               |                | Normal | Normal      | Normal |
|        |         | Malanil                    | 0   | Normal  |               | Normal | Normal | Normal  |            |               |                | Normal | Normal      | Normal |
|        |         | Malanil                    | 2   | Normal  |               | Normal | Normal | Normal  |            |               |                | Normal | Normal      | Normal |
|        |         | Malanil                    | 3   | Normal  |               | Normal | Normal | Normal  |            |               |                | Normal | Normal      | Normal |
|        |         | Malanil                    | 4   | Normal  |               | Normal | Normal | Normal  |            |               |                | Normal | Normal      | Normal |
|        |         | Malanil                    | 7   | Normal  |               | Normal | Normal | Normal  |            |               |                | Normal | Normal      | Normal |
|        |         | Malanil                    | 14  | Normal  |               | Normal | Normal | Normal  |            |               |                | Normal | Normal      | Normal |
|        |         | Sevuparin/DF02<br>+Malanil | 0   | Normal  |               | Normal | Normal | Normal  |            |               |                | Normal | Normal      | Normal |
|        |         | Sevuparin/DF02<br>+Malanil | 2   | Normal  |               | Normal | Normal | Normal  |            |               |                | Normal | Normal      | Normal |
|        |         | Sevuparin/DF02<br>+Malanil | 3   | Normal  |               | Normal | Normal | Normal  |            |               |                | Normal | Normal      | Normal |
|        |         | Sevuparin/DF02<br>+Malanil | 4   | Normal  |               | Normal | Normal | Normal  |            |               |                | Normal | Normal      | Normal |

TSM02 Individual subject listings part 2

CSR Appendix 16.2

| SUBJID | INITIAL | ARM                        | DAY | THYROID | THY<br>DETAIL | LUNG   | HEART  | ABDOMEN | ABD DETAIL | LIVER<br>(cm) | SPLEEN<br>(cm) | LYMPH  | EXTREMITIES | CNS    |
|--------|---------|----------------------------|-----|---------|---------------|--------|--------|---------|------------|---------------|----------------|--------|-------------|--------|
|        |         | Sevuparin/DF02<br>+Malanil | 7   | Normal  |               | Normal | Normal | Normal  |            |               |                | Normal | Normal      | Normal |
|        |         | Sevuparin/DF02<br>+Malanil | 14  | Normal  |               | Normal | Normal | Normal  |            |               |                | Normal | Normal      | Normal |
|        |         | Sevuparin/DF02<br>+Malanil | 0   | Normal  |               | Normal | Normal | Normal  |            |               |                | Normal | Normal      | Normal |
|        |         | Sevuparin/DF02<br>+Malanil | 2   | Normal  |               | Normal | Normal | Normal  |            |               |                | Normal | Normal      | Normal |
|        |         | Sevuparin/DF02<br>+Malanil | 3   | Normal  |               | Normal | Normal | Normal  |            |               |                | Normal | Normal      | Normal |
|        |         | Sevuparin/DF02<br>+Malanil | 4   | Normal  |               | Normal | Normal | Normal  |            |               |                | Normal | Normal      | Normal |
|        |         | Sevuparin/DF02<br>+Malanil | 7   | Normal  |               | Normal | Normal | Normal  |            |               |                | Normal | Normal      | Normal |
|        |         | Sevuparin/DF02<br>+Malanil | 14  | Normal  |               | Normal | Normal | Normal  |            |               |                | Normal | Normal      | Normal |
|        |         | Sevuparin/DF02<br>+Malanil | 0   | Normal  |               | Normal | Normal | Normal  |            |               |                | Normal | Normal      | Normal |
|        |         | Sevuparin/DF02<br>+Malanil | 1   | Normal  |               | Normal | Normal | Normal  |            |               |                | Normal | Normal      | Normal |
|        |         | Sevuparin/DF02<br>+Malanil | 2   | Normal  |               | Normal | Normal | Normal  |            |               |                | Normal | Normal      | Normal |
|        |         | Sevuparin/DF02<br>+Malanil | 3   | Normal  |               | Normal | Normal | Normal  |            |               |                | Normal | Normal      | Normal |
|        |         | Sevuparin/DF02<br>+Malanil | 4   | Normal  |               | Normal | Normal | Normal  |            |               |                | Normal | Normal      | Normal |
|        |         | Sevuparin/DF02<br>+Malanil | 7   | Normal  |               | Normal | Normal | Normal  |            |               |                | Normal | Normal      | Normal |

TSM02 Individual subject listings part 2

CSR Appendix 16.2

| SUBJID | INITIAL | ARM                        | DAY | THYROID | THY<br>DETAIL | LUNG   | HEART  | ABDOMEN | ABD DETAIL | LIVER<br>(cm) | SPLEEN<br>(cm) | LYMPH  | EXTREMITIES | CNS    |
|--------|---------|----------------------------|-----|---------|---------------|--------|--------|---------|------------|---------------|----------------|--------|-------------|--------|
|        |         | Sevuparin/DF02<br>+Malanil | 14  | Normal  |               | Normal | Normal | Normal  |            |               |                | Normal | Normal      | Normal |
|        |         | Sevuparin/DF02<br>+Malanil | 0   | Normal  |               | Normal | Normal | Normal  |            |               |                | Normal | Normal      | Normal |
|        |         | Sevuparin/DF02<br>+Malanil | 2   | Normal  |               | Normal | Normal | Normal  |            |               |                | Normal | Normal      | Normal |
|        |         | Sevuparin/DF02<br>+Malanil | 3   | Normal  |               | Normal | Normal | Normal  |            |               |                | Normal | Normal      | Normal |
|        |         | Sevuparin/DF02<br>+Malanil | 4   | Normal  |               | Normal | Normal | Normal  |            |               |                | Normal | Normal      | Normal |
|        |         | Sevuparin/DF02<br>+Malanil | 7   | Normal  |               | Normal | Normal | Normal  |            |               |                | Normal | Normal      | Normal |
|        |         | Sevuparin/DF02<br>+Malanil | 14  | Normal  |               | Normal | Normal | Normal  |            |               |                | Normal | Normal      | Normal |
|        |         | Sevuparin/DF02<br>+Malanil | 0   | Normal  |               | Normal | Normal | Normal  |            |               |                | Normal | Normal      | Normal |
|        |         | Sevuparin/DF02<br>+Malanil | 2   | Normal  |               | Normal | Normal | Normal  |            |               |                | Normal | Normal      | Normal |
|        |         | Sevuparin/DF02<br>+Malanil | 3   | Normal  |               | Normal | Normal | Normal  |            |               |                | Normal | Normal      | Normal |
|        |         | Sevuparin/DF02<br>+Malanil | 4   | Normal  |               | Normal | Normal | Normal  |            |               |                | Normal | Normal      | Normal |
|        |         | Sevuparin/DF02<br>+Malanil | 7   | Normal  |               | Normal | Normal | Normal  |            |               |                | Normal | Normal      | Normal |
|        |         | Sevuparin/DF02<br>+Malanil | 14  | Normal  |               | Normal | Normal | Normal  |            |               |                | Normal | Normal      | Normal |
|        |         | Malanil                    | 0   | Normal  |               | Normal | Normal | Normal  |            |               |                | Normal | Normal      | Normal |

TSM02 Individual subject listings part 2

CSR Appendix 16.2

| SUBJID | INITIAL | ARM     | DAY | THYROID | THY<br>DETAIL | LUNG   | HEART  | ABDOMEN | ABD DETAIL | LIVER<br>(cm) | SPLEEN<br>(cm) | LYMPH  | EXTREMITIES | CNS    |
|--------|---------|---------|-----|---------|---------------|--------|--------|---------|------------|---------------|----------------|--------|-------------|--------|
|        |         | Malanil | 2   | Normal  |               | Normal | Normal | Normal  |            |               |                | Normal | Normal      | Normal |
|        |         | Malanil | 3   | Normal  |               | Normal | Normal | Normal  |            |               |                | Normal | Normal      | Normal |
|        |         | Malanil | 4   | Normal  |               | Normal | Normal | Normal  |            |               |                | Normal | Normal      | Normal |
|        |         | Malanil | 7   | Normal  |               | Normal | Normal | Normal  |            |               |                | Normal | Normal      | Normal |
|        |         | Malanil | 14  | Normal  |               | Normal | Normal | Normal  |            |               |                | Normal | Normal      | Normal |
|        |         | Malanil | 0   | Normal  |               | Normal | Normal | Normal  |            |               |                | Normal | Normal      | Normal |
|        |         | Malanil | 2   | Normal  |               | Normal | Normal | Normal  |            |               |                | Normal | Normal      | Normal |
|        |         | Malanil | 3   | Normal  |               | Normal | Normal | Normal  |            |               |                | Normal | Normal      | Normal |
|        |         | Malanil | 4   | Normal  |               | Normal | Normal | Normal  |            |               |                | Normal | Normal      | Normal |
|        |         | Malanil | 7   | Normal  |               | Normal | Normal | Normal  |            |               |                | Normal | Normal      | Normal |
|        |         | Malanil | 14  | Normal  |               | Normal | Normal | Normal  |            |               |                | Normal | Normal      | Normal |
|        |         | Malanil | 0   | Normal  |               | Normal | Normal | Normal  |            |               |                | Normal | Normal      | Normal |
|        |         | Malanil | 2   | Normal  |               | Normal | Normal | Normal  |            |               |                | Normal | Normal      | Normal |
|        |         | Malanil | 3   | Normal  |               | Normal | Normal | Normal  |            |               |                | Normal | Normal      | Normal |
|        |         | Malanil | 4   | Normal  |               | Normal | Normal | Normal  |            |               |                | Normal | Normal      | Normal |
|        |         | Malanil | 5   | Normal  |               | Normal | Normal | Normal  |            |               |                | Normal | Normal      | Normal |
|        |         | Malanil | 7   | Normal  |               | Normal | Normal | Normal  |            |               |                | Normal | Normal      | Normal |
|        |         | Malanil | 14  | Normal  |               | Normal | Normal | Normal  |            |               |                | Normal | Normal      | Normal |

## TSM02 Individual subject listings part 2

## CSR Appendix 16.2

## 16.2.7.4 Vital signs

| SUBJID | INITIAL | ARM                    | TIMEPOINT | TEMP (°C) | HR (bpm) | RR (bpm) | BP (mmHg) |
|--------|---------|------------------------|-----------|-----------|----------|----------|-----------|
|        |         | Malanil                | screening | 37        | 92       | 20       | 127/076   |
|        |         | Malanil                | D1H0      | 37.2      | 80       | 20       | 108/062   |
|        |         | Malanil                | D1H6      | 37.5      | 78       | 20       | 111/065   |
|        |         | Malanil                | D1H12     | 36.6      | 72       | 20       | 107/060   |
|        |         | Malanil                | D1H18     | 36.8      | 78       | 20       | 115/064   |
|        |         | Malanil                | D2H24     | 36.4      | 80       | 20       | 108/058   |
|        |         | Malanil                | D2H30     | 37.3      | 70       | 20       | 097/056   |
|        |         | Malanil                | D2H36     | 36.4      | 74       | 20       | 105/059   |
|        |         | Malanil                | D2H42     | 36.2      | 62       | 20       | 106/061   |
|        |         | Malanil                | D3H48     | 36.2      | 62       | 20       | 109/053   |
|        |         | Malanil                | D3H54     | 36.9      | 70       | 20       | 122/071   |
|        |         | Malanil                | D3H60     | 36.4      | 66       | 20       | 104/065   |
|        |         | Malanil                | D3H66     | 36.2      | 76       | 20       | 110/066   |
|        |         | Malanil                | D4H72     | 36.1      | 70       | 20       | 107/062   |
|        |         | Sevuparin/DF02+Malanil | screening | 36.8      | 68       | 20       | 125/073   |
|        |         | Sevuparin/DF02+Malanil | D1H0      | 37.2      | 70       | 20       | 104/053   |
|        |         | Sevuparin/DF02+Malanil | D1H6      | 37.2      | 70       | 20       | 117/063   |
|        |         | Sevuparin/DF02+Malanil | D1H12     | 37.2      | 62       | 20       | 107/065   |
|        |         | Sevuparin/DF02+Malanil | D1H18     | 35.8      | 62       | 20       | 102/057   |
|        |         | Sevuparin/DF02+Malanil | D2H24     | 36.5      | 64       | 20       | 111/059   |
|        |         | Sevuparin/DF02+Malanil | D2H30     | 36.5      | 64       | 20       | 106/055   |
|        |         | Sevuparin/DF02+Malanil | D2H36     | 35.9      | 58       | 20       | 106/062   |
|        |         | Sevuparin/DF02+Malanil | D2H42     | 36.4      | 62       | 20       | 103/058   |
|        |         | Sevuparin/DF02+Malanil | D3H48     | 36.9      | 64       | 20       | 106/055   |
|        |         | Sevuparin/DF02+Malanil | D3H54     | 36.8      | 62       | 20       | 117/063   |
|        |         | Sevuparin/DF02+Malanil | D3H60     | 36        | 58       | 20       | 099/054   |
|        |         | Sevuparin/DF02+Malanil | D3H66     | 36.8      | 66       | 20       | 105/062   |
|        |         | Sevuparin/DF02+Malanil | D4H72     | 36.8      | 66       | 20       | 105/062   |
|        |         | Sevuparin/DF02+Malanil | D7        | 37.3      | 92       | 20       | 128/078   |
|        |         | Sevuparin/DF02+Malanil | D14       | 36.9      | 84       | 20       | 119/065   |
|        |         | Sevuparin/DF02+Malanil | screening | 38.8      | 104      | 20       | 118/067   |
|        |         | Sevuparin/DF02+Malanil | D1H0      | 37.6      | 76       | 20       | 110/066   |
|        |         | Sevuparin/DF02+Malanil | D1H6      | 37.6      | 72       | 20       | 125/080   |
|        |         | Sevuparin/DF02+Malanil | D1H12     | 35.9      | 64       | 20       | 107/061   |
|        |         | Sevuparin/DF02+Malanil | D1H18     | 37.5      | 70       | 20       | 101/062   |

## TSM02 Individual subject listings part 2

## CSR Appendix 16.2

| SUBJID | INITIAL | ARM                    | TIMEPOINT | TEMP (°C) | HR (bpm) | RR (bpm) | BP (mmHg) |
|--------|---------|------------------------|-----------|-----------|----------|----------|-----------|
|        |         | Sevuparin/DF02+Malanil | D2H24     | 38.1      | 78       | 20       | 105/047   |
|        |         | Sevuparin/DF02+Malanil | D2H30     | 38.8      | 86       | 20       | 108/059   |
|        |         | Sevuparin/DF02+Malanil | D2H36     | 38.8      | 80       | 20       | 100/060   |
|        |         | Sevuparin/DF02+Malanil | D2H42     | 37.5      | 76       | 20       | 091/053   |
|        |         | Sevuparin/DF02+Malanil | D3H48     | 37.4      | 70       | 20       | 107/063   |
|        |         | Sevuparin/DF02+Malanil | D3H54     | 36.7      | 72       | 20       | 116/078   |
|        |         | Sevuparin/DF02+Malanil | D3H60     | 35.2      | 60       | 20       | 110/076   |
|        |         | Sevuparin/DF02+Malanil | D3H66     | 36        | 60       | 20       | 100/050   |
|        |         | Sevuparin/DF02+Malanil | D4H72     | 36.4      | 70       | 20       | 117/076   |
|        |         | Sevuparin/DF02+Malanil | D5        | 35.9      | 68       | 20       | 117/067   |
|        |         | Sevuparin/DF02+Malanil | D7        | 37        | 80       | 20       | 120/068   |
|        |         | Sevuparin/DF02+Malanil | D14       | 37        | 82       | 20       | 123/065   |
|        |         | Malanil                | screening | 36.8      | 72       | 20       | 106/061   |
|        |         | Malanil                | D1H0      | 36.9      | 78       | 20       | 100/053   |
|        |         | Malanil                | D1H6      | 37.6      | 64       | 20       | 117/058   |
|        |         | Malanil                | D1H12     | 38.3      | 72       | 20       | 130/055   |
|        |         | Malanil                | D1H18     | 36.3      | 60       | 20       | 099/052   |
|        |         | Malanil                | D2H24     | 36.4      | 58       | 20       | 115/058   |
|        |         | Malanil                | D2H30     | 36.8      | 68       | 20       | 112/057   |
|        |         | Malanil                | D2H36     | 36        | 56       | 20       | 102/057   |
|        |         | Malanil                | D2H42     | 35.4      | 58       | 20       | 106/078   |
|        |         | Malanil                | D3H48     | 36.4      | 90       | 20       | 100/060   |
|        |         | Malanil                | D3H54     | 36.5      | 58       | 20       | 121/056   |
|        |         | Malanil                | D3H60     | 36.7      | 56       | 20       | 117/061   |
|        |         | Malanil                | D3H66     | 36.6      | 64       | 20       | 109/056   |
|        |         | Malanil                | D4H72     | 36.6      | 64       | 20       | 109/056   |
|        |         | Malanil                | D7        | 36.6      | 70       | 20       | 115/066   |
|        |         | Malanil                | D14       | 35.5      | 62       | 20       | 108/052   |
|        |         | Malanil                | screening | 37        | 106      | 20       | 126/066   |
|        |         | Malanil                | D1H0      | 37        | 90       | 20       | 102/054   |
|        |         | Malanil                | D1H6      | 38.2      | 92       | 22       | 118/061   |
|        |         | Malanil                | D1H12     | 36.9      | 70       | 20       | 106/059   |
|        |         | Malanil                | D1H18     | 36.9      | 72       | 20       | 108/059   |
|        |         | Malanil                | D2H24     | 37.2      | 90       | 20       | 117/065   |
|        |         | Malanil                | D2H30     | 37.1      | 84       | 20       | 122/063   |
|        |         | Malanil                | D2H36     | 37        | 70       | 20       | 095/055   |
|        |         | Malanil                | D2H42     | 36        | 68       | 20       | 102/054   |

## TSM02 Individual subject listings part 2

## CSR Appendix 16.2

| SUBJID | INITIAL | ARM                    | TIMEPOINT | TEMP (°C) | HR (bpm) | RR (bpm) | BP (mmHg) |
|--------|---------|------------------------|-----------|-----------|----------|----------|-----------|
|        |         | Malanil                | D3H48     | 36        | 70       | 20       | 116/066   |
|        |         | Malanil                | D3H54     | 36        | 80       | 20       | 119/085   |
|        |         | Malanil                | D3H60     | 36.6      | 72       | 20       | 099/054   |
|        |         | Malanil                | D3H66     | 36.3      | 80       | 20       | 121/065   |
|        |         | Malanil                | D4H72     | 36.3      | 80       | 20       | 121/065   |
|        |         | Malanil                | D7        | 36.2      | 96       | 20       | 119/072   |
|        |         | Malanil                | D14       | 36.9      | 100      | 20       | 112/066   |
|        |         | Sevuparin/DF02+Malanil | screening | 37.7      | 90       | 20       | 131/054   |
|        |         | Sevuparin/DF02+Malanil | D1H0      | 37.3      | 82       | 20       | 119/061   |
|        |         | Sevuparin/DF02+Malanil | D1H6      | 36.9      | 78       | 20       | 120/062   |
|        |         | Sevuparin/DF02+Malanil | D1H12     | 36.6      | 70       | 20       | 127/066   |
|        |         | Sevuparin/DF02+Malanil | D1H18     | 36.6      | 64       | 20       | 122/064   |
|        |         | Sevuparin/DF02+Malanil | D2H24     | 36.7      | 62       | 20       | 103/055   |
|        |         | Sevuparin/DF02+Malanil | D2H30     | 36.9      | 60       | 20       | 130/055   |
|        |         | Sevuparin/DF02+Malanil | D2H36     | 36.9      | 60       | 20       | 122/058   |
|        |         | Sevuparin/DF02+Malanil | D2H42     | 36.1      | 56       | 20       | 119/053   |
|        |         | Sevuparin/DF02+Malanil | D3H48     | 36.7      | 58       | 20       | 133/053   |
|        |         | Sevuparin/DF02+Malanil | D3H54     | 36.7      | 60       | 20       | 122/057   |
|        |         | Sevuparin/DF02+Malanil | D3H60     | 35.3      | 62       | 20       | 109/063   |
|        |         | Sevuparin/DF02+Malanil | D3H66     | 36        | 60       | 20       | 111/065   |
|        |         | Sevuparin/DF02+Malanil | D4H72     | 36.2      | 64       | 20       | 108/064   |
|        |         | Sevuparin/DF02+Malanil | D7        | 35.6      | 72       | 20       | 124/066   |
|        |         | Sevuparin/DF02+Malanil | D14       | 35.3      | 70       | 20       | 126/060   |
|        |         | Malanil                | screening | 36.9      | 108      | 20       | 105/063   |
|        |         | Malanil                | D1H0      | 37.3      | 98       | 20       | 097/066   |
|        |         | Malanil                | D1H6      | 38.9      | 98       | 20       | 100/062   |
|        |         | Malanil                | D1H12     | 36.7      | 88       | 20       | 099/063   |
|        |         | Malanil                | D1H18     | 35.5      | 72       | 20       | 104/063   |
|        |         | Malanil                | D2H24     | 36        | 72       | 20       | 100/064   |
|        |         | Malanil                | D2H30     | 35.5      | 72       | 20       | 097/061   |
|        |         | Malanil                | D2H36     | 35.2      | 70       | 20       | 098/058   |
|        |         | Malanil                | D2H42     | 35.9      | 74       | 20       | 110/073   |
|        |         | Malanil                | D3H48     | 37.5      | 74       | 20       | 100/061   |
|        |         | Malanil                | D3H54     | 36.5      | 72       | 20       | 103/061   |
|        |         | Malanil                | D3H60     | 36.3      | 66       | 20       | 108/056   |
|        |         | Malanil                | D4H72     | 35.7      | 66       | 20       | 102/064   |
|        |         | Malanil                | D7        | 36.2      | 90       | 20       | 115/065   |



## TSM02 Individual subject listings part 2

## CSR Appendix 16.2

| SUBJID | INITIAL | ARM                    | TIMEPOINT | TEMP (°C) | HR (bpm) | RR (bpm) | BP (mmHg) |
|--------|---------|------------------------|-----------|-----------|----------|----------|-----------|
|        |         | Sevuparin/DF02+Malanil | screening | 36.3      | 82       | 20       | 117/065   |
|        |         | Sevuparin/DF02+Malanil | D1H0      | 37        | 94       | 20       | 121/071   |
|        |         | Sevuparin/DF02+Malanil | D1H6      | 37.7      | 86       | 20       | 133/063   |
|        |         | Sevuparin/DF02+Malanil | D1H12     | 38.7      | 90       | 20       | 129/066   |
|        |         | Sevuparin/DF02+Malanil | D1H18     | 36.8      | 62       | 20       | 115/084   |
|        |         | Sevuparin/DF02+Malanil | D2H24     | 37.9      | 82       | 20       | 119/066   |
|        |         | Sevuparin/DF02+Malanil | D2H30     | 39.1      | 92       | 20       | 134/072   |
|        |         | Sevuparin/DF02+Malanil | D2H36     | 36.9      | 72       | 20       | 108/072   |
|        |         | Sevuparin/DF02+Malanil | D2H42     | 36.9      | 78       | 20       | 124/066   |
|        |         | Sevuparin/DF02+Malanil | D3H48     | 37        | 80       | 20       | 108/074   |
|        |         | Sevuparin/DF02+Malanil | D3H54     | 37.6      | 70       | 20       | 117/073   |
|        |         | Sevuparin/DF02+Malanil | D3H60     | 37.2      | 68       | 20       | 128/070   |
|        |         | Sevuparin/DF02+Malanil | D4H72     | 36.5      | 64       | 20       | 122/075   |
|        |         | Sevuparin/DF02+Malanil | D7        | 37.4      | 86       | 20       | 128/067   |
|        |         | Sevuparin/DF02+Malanil | D14       | 35.3      | 92       | 20       | 105/076   |
|        |         | Sevuparin/DF02+Malanil | screening | 36.3      | 94       | 20       | 093/053   |
|        |         | Sevuparin/DF02+Malanil | D1H0      | 36.2      | 84       | 20       | 116/061   |
|        |         | Sevuparin/DF02+Malanil | D1H6      | 38        | 100      | 20       | 113/050   |
|        |         | Sevuparin/DF02+Malanil | D1H12     | 35.8      | 76       | 20       | 099/052   |
|        |         | Sevuparin/DF02+Malanil | D1H18     | 36.6      | 96       | 20       | 109/050   |
|        |         | Sevuparin/DF02+Malanil | D2H24     | 37        | 82       | 20       | 123/064   |
|        |         | Sevuparin/DF02+Malanil | D2H30     | 37.6      | 84       | 20       | 115/058   |
|        |         | Sevuparin/DF02+Malanil | D2H36     | 38.7      | 84       | 20       | 113/055   |
|        |         | Sevuparin/DF02+Malanil | D2H42     | 37.6      | 62       | 20       | 133/053   |
|        |         | Sevuparin/DF02+Malanil | D3H48     | 36.9      | 76       | 20       | 105/069   |
|        |         | Sevuparin/DF02+Malanil | D3H54     | 38.2      | 86       | 20       | 117/061   |
|        |         | Sevuparin/DF02+Malanil | D3H60     | 35.2      | 62       | 20       | 109/055   |
|        |         | Sevuparin/DF02+Malanil | D3H66     | 35.7      | 72       | 20       | 120/060   |
|        |         | Sevuparin/DF02+Malanil | D4H72     | 35.7      | 72       | 20       | 120/060   |
|        |         | Sevuparin/DF02+Malanil | D7        | 36.5      | 84       | 20       | 105/055   |
|        |         | Sevuparin/DF02+Malanil | D14       | 36.6      | 82       | 20       | 094/052   |
|        |         | Malanil                | screening | 35.8      | 88       | 20       | 115/067   |
|        |         | Malanil                | D1H0      | 36.1      | 82       | 20       | 104/058   |
|        |         | Malanil                | D1H6      | 37.7      | 104      | 20       | 110/064   |
|        |         | Malanil                | D1H12     | 36.7      | 82       | 20       | 124/087   |
|        |         | Malanil                | D1H18     | 35.6      | 74       | 20       | 110/065   |
|        |         | Malanil                | D2H24     | 36.9      | 76       | 20       | 105/068   |

## TSM02 Individual subject listings part 2

## CSR Appendix 16.2

| SUBJID | INITIAL | ARM                    | TIMEPOINT | TEMP (°C) | HR (bpm) | RR (bpm) | BP (mmHg) |
|--------|---------|------------------------|-----------|-----------|----------|----------|-----------|
|        |         | Malanil                | D2H30     | 35.6      | 74       | 20       | 108/060   |
|        |         | Malanil                | D2H36     | 36        | 68       | 20       | 106/058   |
|        |         | Malanil                | D2H42     | 36.1      | 76       | 20       | 110/063   |
|        |         | Malanil                | D3H48     | 36        | 76       | 20       | 106/066   |
|        |         | Malanil                | D3H54     | 35.1      | 66       | 20       | 106/064   |
|        |         | Malanil                | D3H60     | 36.1      | 62       | 20       | 108/073   |
|        |         | Malanil                | D3H66     | 36.7      | 70       | 20       | 117/065   |
|        |         | Malanil                | D4H72     | 36.7      | 70       | 20       | 117/065   |
|        |         | Malanil                | D7        | 35.6      | 70       | 20       | 118/061   |
|        |         | Malanil                | D14       | 36        | 80       | 20       | 110/076   |
|        |         | Malanil                | screening | 37.5      | 102      | 20       | 126/064   |
|        |         | Malanil                | D1H0      | 37.3      | 92       | 20       | 120/067   |
|        |         | Malanil                | D1H6      | 36.4      | 90       | 20       | 118/075   |
|        |         | Malanil                | D1H12     | 36.2      | 74       | 20       | 110/060   |
|        |         | Malanil                | D1H18     | 35.3      | 74       | 20       | 112/063   |
|        |         | Malanil                | D2H24     | 36        | 72       | 20       | 110/062   |
|        |         | Malanil                | D2H30     | 36        | 72       | 20       | 111/062   |
|        |         | Malanil                | D2H36     | 36        | 84       | 20       | 113/064   |
|        |         | Malanil                | D2H42     | 36        | 84       | 20       | 119/067   |
|        |         | Malanil                | D3H48     | 35.7      | 74       | 20       | 102/062   |
|        |         | Malanil                | D3H54     | 35.5      | 84       | 20       | 093/061   |
|        |         | Malanil                | D3H60     | 35.2      | 68       | 20       | 109/060   |
|        |         | Malanil                | D4H72     | 35.4      | 82       | 20       | 112/063   |
|        |         | Malanil                | D7        | 37        | 118      | 20       | 126/068   |
|        |         | Malanil                | D14       | 36.8      | 100      | 20       | 123/087   |
|        |         | Sevuparin/DF02+Malanil | screening | 36        | 76       | 20       | 111/071   |
|        |         | Sevuparin/DF02+Malanil | D1H0      | 36.9      | 82       | 20       | 110/070   |
|        |         | Sevuparin/DF02+Malanil | D1H6      | 38.6      | 90       | 20       | 116/075   |
|        |         | Sevuparin/DF02+Malanil | D1H12     | 36.2      | 66       | 20       | 104/068   |
|        |         | Sevuparin/DF02+Malanil | D1H18     | 37.3      | 70       | 20       | 111/068   |
|        |         | Sevuparin/DF02+Malanil | D2H24     | 36        | 78       | 20       | 107/064   |
|        |         | Sevuparin/DF02+Malanil | D2H30     | 36.1      | 72       | 20       | 120/074   |
|        |         | Sevuparin/DF02+Malanil | D2H36     | 36.5      | 64       | 20       | 112/068   |
|        |         | Sevuparin/DF02+Malanil | D2H42     | 36.1      | 60       | 20       | 108/066   |
|        |         | Sevuparin/DF02+Malanil | D3H48     | 36.5      | 66       | 20       | 123/072   |
|        |         | Sevuparin/DF02+Malanil | D3H54     | 37        | 68       | 20       | 116/072   |
|        |         | Sevuparin/DF02+Malanil | D3H60     | 36.6      | 62       | 20       | 122/075   |

## TSM02 Individual subject listings part 2

## CSR Appendix 16.2

| SUBJID | INITIAL | ARM                    | TIMEPOINT | TEMP (°C) | HR (bpm) | RR (bpm) | BP (mmHg) |
|--------|---------|------------------------|-----------|-----------|----------|----------|-----------|
|        |         | Sevuparin/DF02+Malanil | D4H72     | 36        | 74       | 20       | 114/075   |
|        |         | Sevuparin/DF02+Malanil | D7        | 36.7      | 82       | 20       | 102/066   |
|        |         | Sevuparin/DF02+Malanil | screening | 37.7      | 86       | 20       | 130/068   |
|        |         | Sevuparin/DF02+Malanil | D1H0      | 37.4      | 76       | 20       | 125/062   |
|        |         | Sevuparin/DF02+Malanil | D1H6      | 39        | 78       | 20       | 098/054   |
|        |         | Sevuparin/DF02+Malanil | D1H12     | 39.4      | 76       | 20       | 108/070   |
|        |         | Sevuparin/DF02+Malanil | D1H18     | 37.5      | 78       | 20       | 100/070   |
|        |         | Sevuparin/DF02+Malanil | D2H24     | 38        | 70       | 20       | 119/059   |
|        |         | Sevuparin/DF02+Malanil | D2H30     | 36.9      | 76       | 20       | 103/056   |
|        |         | Sevuparin/DF02+Malanil | D2H36     | 37.5      | 66       | 20       | 100/056   |
|        |         | Sevuparin/DF02+Malanil | D2H42     | 37.4      | 72       | 20       | 100/060   |
|        |         | Sevuparin/DF02+Malanil | D3H48     | 36.9      | 74       | 20       | 114/058   |
|        |         | Sevuparin/DF02+Malanil | D3H54     | 37.3      | 80       | 20       | 118/063   |
|        |         | Sevuparin/DF02+Malanil | D3H60     | 36.8      | 68       | 20       | 098/068   |
|        |         | Sevuparin/DF02+Malanil | D4H72     | 36.7      | 62       | 20       | 098/047   |
|        |         | Sevuparin/DF02+Malanil | D7        | 37.5      | 74       | 20       | 132/067   |
|        |         | Sevuparin/DF02+Malanil | D14       | 36.8      | 80       | 20       | 116/066   |
|        |         | Malanil                | screening | 36.5      | 104      | 20       | 120/071   |
|        |         | Malanil                | D1H0      | 36.8      | 94       | 20       | 125/077   |
|        |         | Malanil                | D1H6      | 37        | 82       | 20       | 110/068   |
|        |         | Malanil                | D1H12     | 37.3      | 78       | 20       | 116/070   |
|        |         | Malanil                | D1H18     | 38.9      | 84       | 20       | 115/068   |
|        |         | Malanil                | D2H24     | 38.6      | 92       | 20       | 119/063   |
|        |         | Malanil                | D2H30     | 37.6      | 86       | 20       | 123/075   |
|        |         | Malanil                | D2H36     | 38.3      | 84       | 20       | 111/068   |
|        |         | Malanil                | D2H42     | 37.2      | 76       | 20       | 117/072   |
|        |         | Malanil                | D3H48     | 36.8      | 78       | 20       | 110/070   |
|        |         | Malanil                | D3H54     | 36.9      | 70       | 20       | 110/070   |
|        |         | Malanil                | D3H60     | 36.9      | 62       | 20       | 106/076   |
|        |         | Malanil                | D3H66     | 36.3      | 62       | 20       | 116/074   |
|        |         | Malanil                | D4H72     | 36.3      | 62       | 20       | 116/074   |
|        |         | Malanil                | D7        | 36.5      | 100      | 20       | 121/086   |
|        |         | Malanil                | D14       | 36.4      | 88       | 20       | 120/080   |
|        |         | Malanil                | screening | 39.9      | 128      | 20       | 115/066   |
|        |         | Malanil                | D1H0      | 39.1      | 116      | 20       | 096/057   |
|        |         | Malanil                | D1H6      | 38.9      | 100      | 20       | 100/060   |
|        |         | Malanil                | D1H12     | 36.4      | 84       | 20       | 104/058   |

## TSM02 Individual subject listings part 2

## CSR Appendix 16.2

| SUBJID | INITIAL | ARM                    | TIMEPOINT | TEMP (°C) | HR (bpm) | RR (bpm) | BP (mmHg) |
|--------|---------|------------------------|-----------|-----------|----------|----------|-----------|
|        |         | Malanil                | D1H18     | 36.8      | 94       | 20       | 104/058   |
|        |         | Malanil                | D2H24     | 37.8      | 92       | 20       | 110/060   |
|        |         | Malanil                | D2H30     | 37.4      | 86       | 20       | 109/053   |
|        |         | Malanil                | D2H36     | 38.8      | 78       | 20       | 100/049   |
|        |         | Malanil                | D2H42     | 38.9      | 94       | 20       | 110/060   |
|        |         | Malanil                | D3H48     | 39.5      | 98       | 22       | 115/055   |
|        |         | Malanil                | D3H54     | 39.8      | 100      | 20       | 120/070   |
|        |         | Malanil                | D3H60     | 36        | 80       | 20       | 099/053   |
|        |         | Malanil                | D3H66     | 37.4      | 88       | 20       | 100/060   |
|        |         | Malanil                | D4H72     | 37.4      | 88       | 20       | 100/060   |
|        |         | Malanil                | D7        | 36.7      | 70       | 20       | 115/060   |
|        |         | Malanil                | D14       | 36.2      | 72       | 20       | 120/060   |
|        |         | Malanil                | screening | 37.9      | 64       | 20       | 098/062   |
|        |         | Malanil                | D1H0      | 37.3      | 82       | 20       | 102/063   |
|        |         | Malanil                | D1H6      | 37.1      | 62       | 20       | 105/065   |
|        |         | Malanil                | D1H12     | 36.7      | 64       | 20       | 100/055   |
|        |         | Malanil                | D1H18     | 36.5      | 62       | 20       | 110/070   |
|        |         | Malanil                | D2H24     | 36.3      | 60       | 20       | 108/067   |
|        |         | Malanil                | D2H30     | 36.4      | 60       | 20       | 108/066   |
|        |         | Malanil                | D2H36     | 37.2      | 60       | 20       | 107/068   |
|        |         | Malanil                | D2H42     | 36        | 62       | 20       | 118/072   |
|        |         | Malanil                | D3H48     | 37.2      | 64       | 20       | 112/064   |
|        |         | Malanil                | D3H54     | 36.2      | 60       | 20       | 111/069   |
|        |         | Malanil                | D3H60     | 36.1      | 56       | 20       | 121/067   |
|        |         | Malanil                | D3H66     | 36        | 56       | 20       | 117/068   |
|        |         | Malanil                | D4H72     | 36        | 56       | 20       | 117/068   |
|        |         | Malanil                | D7        | 36.4      | 80       | 20       | 118/068   |
|        |         | Malanil                | D14       | 36        | 78       | 20       | 104/070   |
|        |         | Sevuparin/DF02+Malanil | screening | 36.9      | 90       | 20       | 116/068   |
|        |         | Sevuparin/DF02+Malanil | D1H0      | 37.7      | 78       | 20       | 090/062   |
|        |         | Sevuparin/DF02+Malanil | D1H6      | 38.8      | 82       | 20       | 095/052   |
|        |         | Sevuparin/DF02+Malanil | D1H12     | 37.5      | 72       | 20       | 100/052   |
|        |         | Sevuparin/DF02+Malanil | D1H18     | 36.4      | 74       | 20       | 098/049   |
|        |         | Sevuparin/DF02+Malanil | D2H24     | 36.7      | 74       | 20       | 109/074   |
|        |         | Sevuparin/DF02+Malanil | D2H30     | 37.4      | 70       | 20       | 103/053   |
|        |         | Sevuparin/DF02+Malanil | D2H36     | 36.7      | 68       | 20       | 095/056   |
|        |         | Sevuparin/DF02+Malanil | D2H42     | 36.5      | 64       | 20       | 093/058   |

## TSM02 Individual subject listings part 2

## CSR Appendix 16.2

| SUBJID | INITIAL | ARM                    | TIMEPOINT | TEMP (°C) | HR (bpm) | RR (bpm) | BP (mmHg) |
|--------|---------|------------------------|-----------|-----------|----------|----------|-----------|
|        |         | Sevuparin/DF02+Malanil | D3H48     | 36.8      | 70       | 20       | 100/060   |
|        |         | Sevuparin/DF02+Malanil | D3H54     | 36.8      | 78       | 20       | 103/067   |
|        |         | Sevuparin/DF02+Malanil | D3H60     | 36.6      | 62       | 20       | 096/054   |
|        |         | Sevuparin/DF02+Malanil | D3H66     | 36.7      | 72       | 20       | 104/060   |
|        |         | Sevuparin/DF02+Malanil | D4H72     | 36.7      | 72       | 20       | 104/060   |
|        |         | Sevuparin/DF02+Malanil | D7        | 35.1      | 86       | 20       | 105/064   |
|        |         | Sevuparin/DF02+Malanil | D14       | 36        | 70       | 20       | 109/068   |
|        |         | Sevuparin/DF02+Malanil | screening | 38.5      | 112      | 20       | 112/074   |
|        |         | Sevuparin/DF02+Malanil | D1H0      | 38.6      | 96       | 20       | 108/068   |
|        |         | Sevuparin/DF02+Malanil | D1H6      | 38.8      | 88       | 20       | 104/064   |
|        |         | Sevuparin/DF02+Malanil | D1H12     | 36.5      | 78       | 20       | 098/064   |
|        |         | Sevuparin/DF02+Malanil | D1H18     | 36.3      | 80       | 20       | 118/077   |
|        |         | Sevuparin/DF02+Malanil | D2H24     | 36.6      | 84       | 20       | 117/063   |
|        |         | Sevuparin/DF02+Malanil | D2H30     | 38.2      | 76       | 20       | 123/085   |
|        |         | Sevuparin/DF02+Malanil | D2H36     | 38        | 86       | 20       | 095/053   |
|        |         | Sevuparin/DF02+Malanil | D2H42     | 37.6      | 76       | 18       | 126/074   |
|        |         | Sevuparin/DF02+Malanil | D3H48     | 37.9      | 64       | 20       | 127/077   |
|        |         | Sevuparin/DF02+Malanil | D3H54     | 37.6      | 68       | 20       | 100/057   |
|        |         | Sevuparin/DF02+Malanil | D3H60     | 36.7      | 64       | 20       | 105/065   |
|        |         | Sevuparin/DF02+Malanil | D3H66     | 36.3      | 68       | 20       | 111/063   |
|        |         | Sevuparin/DF02+Malanil | D4H72     | 36.3      | 68       | 20       | 111/063   |
|        |         | Sevuparin/DF02+Malanil | D7        | 36.9      | 86       | 20       | 126/082   |
|        |         | Sevuparin/DF02+Malanil | D14       | 36.7      | 80       | 20       | 130/080   |
|        |         | Sevuparin/DF02+Malanil | screening | 37.3      | 104      | 20       | 118/052   |
|        |         | Sevuparin/DF02+Malanil | D1H0      | 39.1      | 110      | 20       | 090/050   |
|        |         | Sevuparin/DF02+Malanil | D1H6      | 37.1      | 108      | 20       | 109/053   |
|        |         | Sevuparin/DF02+Malanil | D1H12     | 37.2      | 100      | 20       | 096/060   |
|        |         | Sevuparin/DF02+Malanil | D1H18     | 37.5      | 92       | 20       | 105/098   |
|        |         | Sevuparin/DF02+Malanil | D2H24     | 38.2      | 98       | 20       | 115/060   |
|        |         | Sevuparin/DF02+Malanil | D2H30     | 38.2      | 102      | 22       | 093/057   |
|        |         | Sevuparin/DF02+Malanil | D2H36     | 36.8      | 94       | 20       | 098/051   |
|        |         | Sevuparin/DF02+Malanil | D2H42     | 37.8      | 98       | 20       | 107/059   |
|        |         | Sevuparin/DF02+Malanil | D3H48     | 37.3      | 98       | 20       | 102/059   |
|        |         | Sevuparin/DF02+Malanil | D3H54     | 38.2      | 96       | 20       | 093/054   |
|        |         | Sevuparin/DF02+Malanil | D3H60     | 36.8      | 84       | 20       | 095/054   |
|        |         | Sevuparin/DF02+Malanil | D3H66     | 36        | 80       | 20       | 101/047   |
|        |         | Sevuparin/DF02+Malanil | D4H72     | 36.4      | 82       | 20       | 100/062   |

## TSM02 Individual subject listings part 2

## CSR Appendix 16.2

| SUBJID | INITIAL | ARM                    | TIMEPOINT | TEMP (°C) | HR (bpm) | RR (bpm) | BP (mmHg) |
|--------|---------|------------------------|-----------|-----------|----------|----------|-----------|
|        |         | Sevuparin/DF02+Malanil | D7        | 36        | 94       | 20       | 113/066   |
|        |         | Sevuparin/DF02+Malanil | D14       | 36.3      | 96       | 20       | 100/060   |
|        |         | Malanil                | screening | 36.8      | 74       | 20       | 117/062   |
|        |         | Malanil                | D1H0      | 36.6      | 76       | 20       | 110/070   |
|        |         | Malanil                | D1H6      | 37        | 76       | 20       | 109/076   |
|        |         | Malanil                | D1H12     | 36        | 62       | 20       | 104/052   |
|        |         | Malanil                | D1H18     | 36.7      | 60       | 20       | 115/051   |
|        |         | Malanil                | D2H24     | 36.8      | 60       | 20       | 125/087   |
|        |         | Malanil                | D2H30     | 36.7      | 62       | 20       | 099/051   |
|        |         | Malanil                | D2H36     | 36.1      | 56       | 20       | 101/056   |
|        |         | Malanil                | D2H42     | 36.3      | 56       | 20       | 103/058   |
|        |         | Malanil                | D3H48     | 36.6      | 56       | 20       | 113/064   |
|        |         | Malanil                | D3H54     | 37        | 52       | 20       | 121/063   |
|        |         | Malanil                | D3H60     | 36.5      | 80       | 20       | 111/055   |
|        |         | Malanil                | D3H66     | 36        | 60       | 20       | 117/059   |
|        |         | Malanil                | D4H72     | 36        | 60       | 20       | 117/059   |
|        |         | Malanil                | D7        | 36.5      | 60       | 20       | 108/052   |
|        |         | Malanil                | D14       | 36.7      | 62       | 20       | 098/055   |
|        |         | Sevuparin/DF02+Malanil | screening | 37.6      | 96       | 20       | 118/061   |
|        |         | Sevuparin/DF02+Malanil | D1H0      | 39.7      | 98       | 20       | 094/051   |
|        |         | Sevuparin/DF02+Malanil | D1H6      | 37.7      | 90       | 20       | 123/070   |
|        |         | Sevuparin/DF02+Malanil | D1H12     | 38.6      | 90       | 20       | 116/060   |
|        |         | Sevuparin/DF02+Malanil | D1H18     | 36.5      | 70       | 20       | 113/062   |
|        |         | Sevuparin/DF02+Malanil | D2H24     | 37.6      | 78       | 20       | 113/057   |
|        |         | Sevuparin/DF02+Malanil | D2H30     | 37.5      | 92       | 20       | 103/054   |
|        |         | Sevuparin/DF02+Malanil | D2H36     | 36.7      | 78       | 20       | 100/060   |
|        |         | Sevuparin/DF02+Malanil | D2H42     | 37.2      | 78       | 20       | 120/070   |
|        |         | Sevuparin/DF02+Malanil | D3H48     | 38.4      | 80       | 20       | 115/062   |
|        |         | Sevuparin/DF02+Malanil | D3H54     | 37.4      | 82       | 20       | 116/070   |
|        |         | Sevuparin/DF02+Malanil | D3H60     | 37.2      | 66       | 20       | 125/078   |
|        |         | Sevuparin/DF02+Malanil | D3H66     | 36.8      | 64       | 20       | 119/063   |
|        |         | Sevuparin/DF02+Malanil | D4H72     | 36.8      | 64       | 20       | 119/063   |
|        |         | Sevuparin/DF02+Malanil | D7        | 36.3      | 82       | 20       | 131/068   |
|        |         | Sevuparin/DF02+Malanil | D14       | 36.8      | 74       | 20       | 121/065   |
|        |         | Sevuparin/DF02+Malanil | screening | 38.1      | 118      | 20       | 114/069   |
|        |         | Sevuparin/DF02+Malanil | D1H0      | 36.8      | 94       | 20       | 099/058   |
|        |         | Sevuparin/DF02+Malanil | D1H6      | 38.9      | 102      | 20       | 099/060   |

## TSM02 Individual subject listings part 2

## CSR Appendix 16.2

| SUBJID | INITIAL | ARM                    | TIMEPOINT | TEMP (°C) | HR (bpm) | RR (bpm) | BP (mmHg) |
|--------|---------|------------------------|-----------|-----------|----------|----------|-----------|
|        |         | Sevuparin/DF02+Malanil | D1H12     | 38        | 88       | 22       | 113/063   |
|        |         | Sevuparin/DF02+Malanil | D1H18     | 37.3      | 78       | 20       | 108/059   |
|        |         | Sevuparin/DF02+Malanil | D2H24     | 38.6      | 92       | 20       | 117/063   |
|        |         | Sevuparin/DF02+Malanil | D2H30     | 38        | 82       | 20       | 113/067   |
|        |         | Sevuparin/DF02+Malanil | D2H36     | 36.3      | 76       | 20       | 109/061   |
|        |         | Sevuparin/DF02+Malanil | D2H42     | 36.5      | 72       | 20       | 126/061   |
|        |         | Sevuparin/DF02+Malanil | D3H48     | 36.6      | 74       | 20       | 116/062   |
|        |         | Sevuparin/DF02+Malanil | D3H54     | 36.6      | 74       | 20       | 116/070   |
|        |         | Sevuparin/DF02+Malanil | D3H60     | 36.2      | 60       | 20       | 106/057   |
|        |         | Sevuparin/DF02+Malanil | D3H66     | 36.3      | 58       | 20       | 108/060   |
|        |         | Sevuparin/DF02+Malanil | D4H72     | 36.3      | 58       | 20       | 108/060   |
|        |         | Sevuparin/DF02+Malanil | D7        | 36.5      | 110      | 20       | 124/065   |
|        |         | Sevuparin/DF02+Malanil | D14       | 36.7      | 100      | 20       | 108/062   |
|        |         | Sevuparin/DF02+Malanil | screening | 37.2      | 128      | 20       | 113/079   |
|        |         | Sevuparin/DF02+Malanil | D1H0      | 37.9      | 128      | 20       | 110/071   |
|        |         | Sevuparin/DF02+Malanil | D1H6      | 36.5      | 98       | 20       | 103/073   |
|        |         | Sevuparin/DF02+Malanil | D1H12     | 36.3      | 94       | 20       | 096/058   |
|        |         | Sevuparin/DF02+Malanil | D1H18     | 36.8      | 94       | 20       | 106/074   |
|        |         | Sevuparin/DF02+Malanil | D2H24     | 36.5      | 86       | 20       | 100/060   |
|        |         | Sevuparin/DF02+Malanil | D2H30     | 38.6      | 118      | 22       | 093/053   |
|        |         | Sevuparin/DF02+Malanil | D2H36     | 36.8      | 88       | 20       | 096/068   |
|        |         | Sevuparin/DF02+Malanil | D2H42     | 36.6      | 88       | 20       | 093/061   |
|        |         | Sevuparin/DF02+Malanil | D3H48     | 36.7      | 92       | 20       | 090/066   |
|        |         | Sevuparin/DF02+Malanil | D3H54     | 37.1      | 98       | 20       | 091/060   |
|        |         | Sevuparin/DF02+Malanil | D3H60     | 36.2      | 70       | 20       | 105/063   |
|        |         | Sevuparin/DF02+Malanil | D3H66     | 36        | 78       | 20       | 098/062   |
|        |         | Sevuparin/DF02+Malanil | D4H72     | 36        | 78       | 20       | 098/062   |
|        |         | Sevuparin/DF02+Malanil | D7        | 37.6      | 100      | 20       | 119/079   |
|        |         | Sevuparin/DF02+Malanil | D14       | 36.7      | 94       | 20       | 123/079   |
|        |         | Sevuparin/DF02+Malanil | screening | 37.3      | 110      | 20       | 109/055   |
|        |         | Sevuparin/DF02+Malanil | D1H0      | 38.1      | 98       | 20       | 110/065   |
|        |         | Sevuparin/DF02+Malanil | D1H6      | 38        | 100      | 20       | 093/065   |
|        |         | Sevuparin/DF02+Malanil | D1H12     | 38.2      | 86       | 20       | 096/056   |
|        |         | Sevuparin/DF02+Malanil | D1H18     | 37        | 78       | 20       | 120/060   |
|        |         | Sevuparin/DF02+Malanil | D2H24     | 39.6      | 98       | 20       | 116/066   |
|        |         | Sevuparin/DF02+Malanil | D2H30     | 40.3      | 98       | 20       | 108/052   |
|        |         | Sevuparin/DF02+Malanil | D2H36     | 38.2      | 86       | 20       | 097/057   |

## TSM02 Individual subject listings part 2

## CSR Appendix 16.2

| SUBJID | INITIAL | ARM                    | TIMEPOINT | TEMP (°C) | HR (bpm) | RR (bpm) | BP (mmHg) |
|--------|---------|------------------------|-----------|-----------|----------|----------|-----------|
|        |         | Sevuparin/DF02+Malanil | D2H42     | 36.8      | 74       | 20       | 107/056   |
|        |         | Sevuparin/DF02+Malanil | D3H48     | 37.1      | 76       | 20       | 105/067   |
|        |         | Sevuparin/DF02+Malanil | D3H54     | 37.5      | 76       | 20       | 090/053   |
|        |         | Sevuparin/DF02+Malanil | D3H60     | 37.6      | 68       | 20       | 094/056   |
|        |         | Sevuparin/DF02+Malanil | D3H66     | 36.7      | 66       | 20       | 097/057   |
|        |         | Sevuparin/DF02+Malanil | D4H72     | 36.7      | 66       | 20       | 097/057   |
|        |         | Sevuparin/DF02+Malanil | D7        | 36.9      | 86       | 20       | 109/057   |
|        |         | Sevuparin/DF02+Malanil | D14       | 36.5      | 76       | 20       | 110/068   |
|        |         | Malanil                | screening | 37.2      | 80       | 20       | 114/076   |
|        |         | Malanil                | D1H0      | 36.6      | 74       | 20       | 103/067   |
|        |         | Malanil                | D1H6      | 37.3      | 88       | 20       | 105/075   |
|        |         | Malanil                | D1H12     | 37.4      | 68       | 20       | 108/078   |
|        |         | Malanil                | D1H18     | 36.7      | 82       | 20       | 116/078   |
|        |         | Malanil                | D2H24     | 38.4      | 80       | 20       | 109/073   |
|        |         | Malanil                | D2H30     | 37.7      | 88       | 20       | 113/063   |
|        |         | Malanil                | D2H36     | 37.6      | 88       | 20       | 115/080   |
|        |         | Malanil                | D2H42     | 38.2      | 76       | 24       | 108/072   |
|        |         | Malanil                | D3H48     | 36.7      | 88       | 20       | 100/050   |
|        |         | Malanil                | D3H54     | 37.3      | 88       | 20       | 105/075   |
|        |         | Malanil                | D3H60     | 36.4      | 82       | 20       | 102/068   |
|        |         | Malanil                | D3H66     | 36.5      | 88       | 20       | 108/062   |
|        |         | Malanil                | D7        | 36.6      | 86       | 24       | 112/072   |
|        |         | Malanil                | D14       | 36.1      | 76       | 20       | 129/080   |
|        |         | Malanil                | screening | 36.4      | 80       | 20       | 112/071   |
|        |         | Malanil                | D1H0      | 37.4      | 82       | 20       | 108/067   |
|        |         | Malanil                | D1H6      | 37.2      | 98       | 20       | 106/061   |
|        |         | Malanil                | D1H12     | 38.1      | 90       | 20       | 090/053   |
|        |         | Malanil                | D1H18     | 38.3      | 90       | 20       | 109/058   |
|        |         | Malanil                | D2H24     | 38.3      | 92       | 20       | 095/055   |
|        |         | Malanil                | D2H30     | 37        | 80       | 20       | 113/078   |
|        |         | Malanil                | D2H36     | 38.8      | 80       | 24       | 102/067   |
|        |         | Malanil                | D2H42     | 36.4      | 70       | 20       | 100/060   |
|        |         | Malanil                | D3H48     | 36.7      | 88       | 20       | 099/059   |
|        |         | Malanil                | D3H54     | 36.6      | 76       | 20       | 100/063   |
|        |         | Malanil                | D3H60     | 36.5      | 74       | 20       | 102/058   |
|        |         | Malanil                | D3H66     | 36.3      | 64       | 20       | 103/058   |
|        |         | Malanil                | D7        | 36.8      | 78       | 20       | 106/064   |



## TSM02 Individual subject listings part 2

## CSR Appendix 16.2

| SUBJID | INITIAL | ARM                    | TIMEPOINT | TEMP (°C) | HR (bpm) | RR (bpm) | BP (mmHg) |
|--------|---------|------------------------|-----------|-----------|----------|----------|-----------|
|        |         | Malanil                | D14       | 36.7      | 80       | 20       | 112/064   |
|        |         | Malanil                | screening | 38.5      | 82       | 20       | 118/058   |
|        |         | Malanil                | D1H0      | 37.4      | 62       | 20       | 104/051   |
|        |         | Malanil                | D1H6      | 37.3      | 68       | 20       | 097/050   |
|        |         | Malanil                | D1H12     | 37.1      | 66       | 20       | 088/046   |
|        |         | Malanil                | D1H18     | 36.7      | 74       | 20       | 103/051   |
|        |         | Malanil                | D2H24     | 37        | 66       | 20       | 113/063   |
|        |         | Malanil                | D2H30     | 36.8      | 74       | 20       | 105/074   |
|        |         | Malanil                | D2H36     | 36.6      | 54       | 20       | 097/056   |
|        |         | Malanil                | D2H42     | 36.4      | 64       | 20       | 090/050   |
|        |         | Malanil                | D3H48     | 36.6      | 76       | 20       | 101/068   |
|        |         | Malanil                | D3H54     | 36.9      | 70       | 20       | 109/064   |
|        |         | Malanil                | D3H60     | 36.5      | 78       | 20       | 105/062   |
|        |         | Malanil                | D3H66     | 37.8      | 68       | 20       | 096/057   |
|        |         | Malanil                | D7        | 37.2      | 76       | 20       | 110/067   |
|        |         | Malanil                | D14       | 36.8      | 90       | 20       | 128/074   |
|        |         | Sevuparin/DF02+Malanil | screening | 36.7      | 84       | 20       | 107/066   |
|        |         | Sevuparin/DF02+Malanil | D1H0      | 36.4      | 66       | 20       | 092/051   |
|        |         | Sevuparin/DF02+Malanil | D1H6      | 37.2      | 76       | 20       | 096/047   |
|        |         | Sevuparin/DF02+Malanil | D1H12     | 36.6      | 74       | 20       | 099/067   |
|        |         | Sevuparin/DF02+Malanil | D1H18     | 36.5      | 70       | 20       | 099/058   |
|        |         | Sevuparin/DF02+Malanil | D2H24     | 36.4      | 72       | 20       | 114/068   |
|        |         | Sevuparin/DF02+Malanil | D2H30     | 36.6      | 66       | 20       | 094/060   |
|        |         | Sevuparin/DF02+Malanil | D2H36     | 36        | 52       | 20       | 094/054   |
|        |         | Sevuparin/DF02+Malanil | D2H42     | 36.7      | 72       | 20       | 104/061   |
|        |         | Sevuparin/DF02+Malanil | D3H48     | 36        | 64       | 20       | 116/067   |
|        |         | Sevuparin/DF02+Malanil | D3H54     | 36        | 66       | 20       | 111/066   |
|        |         | Sevuparin/DF02+Malanil | D3H60     | 36        | 68       | 20       | 094/056   |
|        |         | Sevuparin/DF02+Malanil | D3H66     | 37.2      | 56       | 20       | 100/057   |
|        |         | Sevuparin/DF02+Malanil | D7        | 36.9      | 64       | 20       | 106/070   |
|        |         | Sevuparin/DF02+Malanil | D14       | 36.7      | 76       | 20       | 106/062   |
|        |         | Malanil                | screening | 36.7      | 100      | 20       | 106/066   |
|        |         | Malanil                | D1H0      | 36.7      | 82       | 20       | 095/056   |
|        |         | Malanil                | D1H6      | 37.2      | 86       | 20       | 115/068   |
|        |         | Malanil                | D1H12     | 36        | 78       | 20       | 110/073   |
|        |         | Malanil                | D1H18     | 36.8      | 80       | 20       | 109/065   |
|        |         | Malanil                | D2H24     | 38.7      | 84       | 20       | 110/062   |

## TSM02 Individual subject listings part 2

## CSR Appendix 16.2

| SUBJID | INITIAL | ARM     | TIMEPOINT | TEMP (°C) | HR (bpm) | RR (bpm) | BP (mmHg) |
|--------|---------|---------|-----------|-----------|----------|----------|-----------|
|        |         | Malanil | D2H30     | 38.1      | 86       | 22       | 118/067   |
|        |         | Malanil | D2H36     | 36.3      | 72       | 20       | 094/063   |
|        |         | Malanil | D2H42     | 36.4      | 70       | 20       | 104/065   |
|        |         | Malanil | D3H48     | 36.7      | 66       | 20       | 106/064   |
|        |         | Malanil | D3H54     | 36.7      | 74       | 20       | 106/062   |
|        |         | Malanil | D3H60     | 36        | 68       | 20       | 104/076   |
|        |         | Malanil | D3H66     | 36.8      | 72       | 20       | 100/048   |
|        |         | Malanil | D4H72     | 36        | 60       | 20       | 103/060   |
|        |         | Malanil | D5        | 36.8      | 70       | 20       | 103/062   |
|        |         | Malanil | D6        | 36.2      | 68       | 20       | 106/052   |
|        |         | Malanil | D7        | 36.5      | 68       | 20       | 110/066   |
|        |         | Malanil | D14       | 36.8      | 80       | 20       | 110/064   |
|        |         | Malanil | screening | 36.6      | 84       | 20       | 113/067   |
|        |         | Malanil | D1H0      | 38.7      | 102      | 22       | 120/069   |
|        |         | Malanil | D1H6      | 37.7      | 106      | 22       | 123/064   |
|        |         | Malanil | D1H12     | 36.6      | 86       | 20       | 113/068   |
|        |         | Malanil | D1H18     | 36.5      | 76       | 20       | 110/070   |
|        |         | Malanil | D2H24     | 38.3      | 84       | 20       | 114/051   |
|        |         | Malanil | D2H30     | 36.9      | 74       | 20       | 112/073   |
|        |         | Malanil | D2H36     | 36.2      | 64       | 20       | 128/066   |
|        |         | Malanil | D2H42     | 36.3      | 58       | 20       | 102/062   |
|        |         | Malanil | D3H48     | 36.5      | 60       | 20       | 116/066   |
|        |         | Malanil | D3H54     | 36.6      | 72       | 20       | 121/061   |
|        |         | Malanil | D3H60     | 36.3      | 54       | 20       | 101/058   |
|        |         | Malanil | D3H66     | 36.2      | 52       | 20       | 113/067   |
|        |         | Malanil | D7        | 36.2      | 80       | 20       | 119/064   |
|        |         | Malanil | D14       | 36        | 70       | 20       | 110/071   |
|        |         | Malanil | screening | 37        | 88       | 20       | 123/076   |
|        |         | Malanil | D1H0      | 37        | 88       | 20       | 118/068   |
|        |         | Malanil | D1H6      | 38        | 86       | 20       | 116/069   |
|        |         | Malanil | D1H12     | 38.4      | 82       | 20       | 121/077   |
|        |         | Malanil | D1H18     | 36.7      | 78       | 20       | 128/083   |
|        |         | Malanil | D2H24     | 37.5      | 88       | 20       | 142/088   |
|        |         | Malanil | D2H30     | 36.7      | 78       | 20       | 105/058   |
|        |         | Malanil | D2H36     | 37.3      | 70       | 20       | 127/084   |
|        |         | Malanil | D2H42     | 36.4      | 70       | 20       | 127/078   |
|        |         | Malanil | D3H48     | 36.2      | 86       | 20       | 140/076   |

## TSM02 Individual subject listings part 2

## CSR Appendix 16.2

| SUBJID | INITIAL | ARM                    | TIMEPOINT | TEMP (°C) | HR (bpm) | RR (bpm) | BP (mmHg) |
|--------|---------|------------------------|-----------|-----------|----------|----------|-----------|
|        |         | Malanil                | D3H54     | 36.8      | 76       | 20       | 113/076   |
|        |         | Malanil                | D3H60     | 36.4      | 76       | 20       | 114/077   |
|        |         | Malanil                | D3H66     | 36.3      | 72       | 20       | 108/073   |
|        |         | Malanil                | D7        | 36.3      | 72       | 20       | 114/068   |
|        |         | Malanil                | D14       | 36.5      | 76       | 20       | 114/068   |
|        |         | Malanil                | screening | 38.8      | 102      | 20       | 123/058   |
|        |         | Malanil                | D1H0      | 38.4      | 98       | 20       | 128/071   |
|        |         | Malanil                | D1H6      | 37.8      | 78       | 20       | 116/068   |
|        |         | Malanil                | D1H12     | 38.6      | 80       | 20       | 102/056   |
|        |         | Malanil                | D1H18     | 36        | 76       | 20       | 109/056   |
|        |         | Malanil                | D2H24     | 39.5      | 86       | 20       | 124/058   |
|        |         | Malanil                | D2H30     | 36.4      | 60       | 20       | 090/050   |
|        |         | Malanil                | D2H36     | 37.1      | 78       | 20       | 107/055   |
|        |         | Malanil                | D2H42     | 36.3      | 68       | 20       | 109/057   |
|        |         | Malanil                | D3H48     | 36.4      | 84       | 20       | 126/064   |
|        |         | Malanil                | D3H54     | 36.3      | 76       | 20       | 111/061   |
|        |         | Malanil                | D3H60     | 36.7      | 78       | 20       | 108/064   |
|        |         | Malanil                | D3H66     | 36.5      | 70       | 20       | 115/062   |
|        |         | Malanil                | D7        | 36.2      | 92       | 20       | 104/077   |
|        |         | Malanil                | D14       | 36.4      | 78       | 20       | 104/060   |
|        |         | Sevuparin/DF02+Malanil | screening | 39.9      | 102      | 20       | 107/057   |
|        |         | Sevuparin/DF02+Malanil | D1H0      | 39.8      | 92       | 20       | 111/052   |
|        |         | Sevuparin/DF02+Malanil | D1H6      | 38.7      | 86       | 20       | 116/069   |
|        |         | Sevuparin/DF02+Malanil | D1H12     | 38        | 92       | 20       | 101/057   |
|        |         | Sevuparin/DF02+Malanil | D1H18     | 36.5      | 86       | 20       | 113/062   |
|        |         | Sevuparin/DF02+Malanil | D2H24     | 39.5      | 102      | 20       | 113/066   |
|        |         | Sevuparin/DF02+Malanil | D2H30     | 36.9      | 68       | 20       | 128/088   |
|        |         | Sevuparin/DF02+Malanil | D2H36     | 38.2      | 100      | 20       | 102/056   |
|        |         | Sevuparin/DF02+Malanil | D2H42     | 36.5      | 72       | 20       | 103/055   |
|        |         | Sevuparin/DF02+Malanil | D3H48     | 36.4      | 76       | 20       | 121/058   |
|        |         | Sevuparin/DF02+Malanil | D3H54     | 36        | 72       | 20       | 092/052   |
|        |         | Sevuparin/DF02+Malanil | D3H60     | 36.5      | 58       | 20       | 092/053   |
|        |         | Sevuparin/DF02+Malanil | D3H66     | 36.7      | 68       | 20       | 090/060   |
|        |         | Sevuparin/DF02+Malanil | D7        | 36        | 88       | 20       | 104/054   |
|        |         | Sevuparin/DF02+Malanil | D14       | 36.4      | 74       | 20       | 100/060   |
|        |         | Malanil                | screening | 38        | 108      | 20       | 116/063   |
|        |         | Malanil                | D1H0      | 38.1      | 110      | 20       | 112/061   |

## TSM02 Individual subject listings part 2

## CSR Appendix 16.2

| SUBJID | INITIAL | ARM     | TIMEPOINT | TEMP (°C) | HR (bpm) | RR (bpm) | BP (mmHg) |
|--------|---------|---------|-----------|-----------|----------|----------|-----------|
|        |         | Malanil | D1H6      | 36.6      | 74       | 20       | 109/067   |
|        |         | Malanil | D1H12     | 36.6      | 84       | 20       | 117/073   |
|        |         | Malanil | D1H18     | 36.3      | 86       | 20       | 123/075   |
|        |         | Malanil | D2H24     | 36.4      | 82       | 20       | 117/068   |
|        |         | Malanil | D2H30     | 38.1      | 94       | 20       | 120/066   |
|        |         | Malanil | D2H36     | 36.4      | 70       | 20       | 100/053   |
|        |         | Malanil | D2H42     | 37.3      | 80       | 20       | 106/070   |
|        |         | Malanil | D3H48     | 37        | 82       | 20       | 110/070   |
|        |         | Malanil | D3H54     | 37.4      | 78       | 20       | 119/064   |
|        |         | Malanil | D3H60     | 36.7      | 76       | 20       | 123/074   |
|        |         | Malanil | D3H66     | 36.3      | 68       | 20       | 119/058   |
|        |         | Malanil | D7        | 36.9      | 64       | 20       | 106/052   |
|        |         | Malanil | D14       | 36.9      | 68       | 20       | 116/062   |
|        |         | Malanil | screening | 36.9      | 60       | 20       | 115/060   |
|        |         | Malanil | D1H0      | 36.9      | 66       | 20       | 122/061   |
|        |         | Malanil | D1H6      | 37.6      | 64       | 20       | 121/055   |
|        |         | Malanil | D1H12     | 36.6      | 70       | 20       | 121/063   |
|        |         | Malanil | D1H18     | 36.4      | 74       | 20       | 116/062   |
|        |         | Malanil | D2H24     | 37        | 68       | 20       | 124/060   |
|        |         | Malanil | D2H30     | 36.6      | 66       | 20       | 130/090   |
|        |         | Malanil | D2H36     | 36.7      | 54       | 20       | 113/064   |
|        |         | Malanil | D2H42     | 36.7      | 68       | 20       | 112/062   |
|        |         | Malanil | D3H48     | 37.5      | 58       | 20       | 122/066   |
|        |         | Malanil | D3H54     | 36.8      | 50       | 20       | 131/067   |
|        |         | Malanil | D3H60     | 36.1      | 58       | 20       | 110/052   |
|        |         | Malanil | D3H66     | 36        | 60       | 20       | 108/058   |
|        |         | Malanil | D7        | 37.4      | 82       | 20       | 118/060   |
|        |         | Malanil | D14       | 36.9      | 92       | 20       | 118/062   |
|        |         | Malanil | screening | 37.2      | 90       | 20       | 101/054   |
|        |         | Malanil | D1H0      | 37.3      | 82       | 20       | 108/061   |
|        |         | Malanil | D1H6      | 36.8      | 88       | 20       | 101/068   |
|        |         | Malanil | D1H12     | 36.9      | 70       | 20       | 100/060   |
|        |         | Malanil | D1H18     | 36.5      | 68       | 20       | 103/061   |
|        |         | Malanil | D2H24     | 38.4      | 90       | 20       | 124/066   |
|        |         | Malanil | D2H30     | 39.2      | 88       | 20       | 118/062   |
|        |         | Malanil | D2H36     | 37.2      | 82       | 20       | 100/056   |
|        |         | Malanil | D2H42     | 36.6      | 68       | 20       | 106/064   |

## TSM02 Individual subject listings part 2

## CSR Appendix 16.2

| SUBJID | INITIAL | ARM                    | TIMEPOINT | TEMP (°C) | HR (bpm) | RR (bpm) | BP (mmHg) |
|--------|---------|------------------------|-----------|-----------|----------|----------|-----------|
|        |         | Malanil                | D3H48     | 36.4      | 72       | 20       | 116/054   |
|        |         | Malanil                | D3H54     | 36.6      | 68       | 20       | 111/061   |
|        |         | Malanil                | D3H60     | 36.2      | 74       | 20       | 102/056   |
|        |         | Malanil                | D3H66     | 36.7      | 64       | 20       | 121/072   |
|        |         | Malanil                | D7        | 36.7      | 76       | 20       | 116/066   |
|        |         | Malanil                | D14       | 36.9      | 72       | 20       | 120/078   |
|        |         | Sevuparin/DF02+Malanil | screening | 37.8      | 104      | 20       | 109/060   |
|        |         | Sevuparin/DF02+Malanil | D1H0      | 37        | 80       | 20       | 100/059   |
|        |         | Sevuparin/DF02+Malanil | D1H6      | 36.8      | 68       | 20       | 110/070   |
|        |         | Sevuparin/DF02+Malanil | D1H12     | 36.4      | 66       | 20       | 108/059   |
|        |         | Sevuparin/DF02+Malanil | D1H18     | 36.6      | 64       | 20       | 106/061   |
|        |         | Sevuparin/DF02+Malanil | D2H24     | 37.3      | 84       | 20       | 106/055   |
|        |         | Sevuparin/DF02+Malanil | D2H30     | 38        | 82       | 20       | 113/058   |
|        |         | Sevuparin/DF02+Malanil | D2H36     | 36.2      | 80       | 20       | 110/060   |
|        |         | Sevuparin/DF02+Malanil | D2H42     | 36.8      | 60       | 20       | 104/064   |
|        |         | Sevuparin/DF02+Malanil | D3H48     | 37.4      | 64       | 20       | 103/065   |
|        |         | Sevuparin/DF02+Malanil | D3H54     | 37.2      | 60       | 20       | 097/058   |
|        |         | Sevuparin/DF02+Malanil | D3H60     | 36.6      | 62       | 20       | 101/053   |
|        |         | Sevuparin/DF02+Malanil | D3H66     | 36        | 66       | 20       | 100/060   |
|        |         | Sevuparin/DF02+Malanil | D7        | 36.4      | 68       | 20       | 115/060   |
|        |         | Sevuparin/DF02+Malanil | D14       | 36.8      | 66       | 20       | 112/056   |
|        |         | Sevuparin/DF02+Malanil | screening | 36.5      | 82       | 20       | 130/064   |
|        |         | Sevuparin/DF02+Malanil | D1H0      | 37        | 82       | 20       | 112/061   |
|        |         | Sevuparin/DF02+Malanil | D1H6      | 36.7      | 72       | 20       | 113/065   |
|        |         | Sevuparin/DF02+Malanil | D1H12     | 36.7      | 66       | 20       | 106/063   |
|        |         | Sevuparin/DF02+Malanil | D1H18     | 36.8      | 66       | 20       | 114/065   |
|        |         | Sevuparin/DF02+Malanil | D2H24     | 37.2      | 70       | 20       | 117/077   |
|        |         | Sevuparin/DF02+Malanil | D2H30     | 36.7      | 72       | 20       | 110/064   |
|        |         | Sevuparin/DF02+Malanil | D2H36     | 36.4      | 64       | 20       | 117/067   |
|        |         | Sevuparin/DF02+Malanil | D2H42     | 36.8      | 68       | 20       | 118/066   |
|        |         | Sevuparin/DF02+Malanil | D3H48     | 36.8      | 58       | 20       | 109/061   |
|        |         | Sevuparin/DF02+Malanil | D3H54     | 36.9      | 70       | 20       | 108/066   |
|        |         | Sevuparin/DF02+Malanil | D3H60     | 36.6      | 78       | 20       | 110/070   |
|        |         | Sevuparin/DF02+Malanil | D3H66     | 36.3      | 74       | 20       | 116/063   |
|        |         | Sevuparin/DF02+Malanil | D7        | 36.7      | 80       | 20       | 102/060   |
|        |         | Sevuparin/DF02+Malanil | D14       | 36.9      | 88       | 20       | 117/058   |
|        |         | Sevuparin/DF02+Malanil | screening | 39        | 110      | 20       | 115/052   |

## TSM02 Individual subject listings part 2

## CSR Appendix 16.2

| SUBJID | INITIAL | ARM                    | TIMEPOINT | TEMP (°C) | HR (bpm) | RR (bpm) | BP (mmHg) |
|--------|---------|------------------------|-----------|-----------|----------|----------|-----------|
|        |         | Sevuparin/DF02+Malanil | D1H0      | 37.7      | 88       | 20       | 104/052   |
|        |         | Sevuparin/DF02+Malanil | D1H6      | 36.7      | 76       | 20       | 107/061   |
|        |         | Sevuparin/DF02+Malanil | D1H12     | 36.9      | 78       | 20       | 104/058   |
|        |         | Sevuparin/DF02+Malanil | D1H18     | 38.3      | 86       | 20       | 102/052   |
|        |         | Sevuparin/DF02+Malanil | D2H24     | 37.7      | 74       | 20       | 112/054   |
|        |         | Sevuparin/DF02+Malanil | D2H30     | 37.5      | 76       | 20       | 114/061   |
|        |         | Sevuparin/DF02+Malanil | D2H36     | 37.2      | 78       | 20       | 117/058   |
|        |         | Sevuparin/DF02+Malanil | D2H42     | 37        | 76       | 20       | 112/074   |
|        |         | Sevuparin/DF02+Malanil | D3H48     | 36.2      | 76       | 20       | 102/072   |
|        |         | Sevuparin/DF02+Malanil | D3H54     | 36.5      | 58       | 20       | 103/051   |
|        |         | Sevuparin/DF02+Malanil | D3H60     | 36.6      | 74       | 20       | 114/067   |
|        |         | Sevuparin/DF02+Malanil | D3H66     | 36        | 58       | 20       | 118/059   |
|        |         | Sevuparin/DF02+Malanil | D7        | 36.8      | 86       | 20       | 116/060   |
|        |         | Sevuparin/DF02+Malanil | D14       | 36.7      | 88       | 20       | 127/066   |
|        |         | Sevuparin/DF02+Malanil | screening | 38        | 106      | 20       | 101/059   |
|        |         | Sevuparin/DF02+Malanil | D1H0      | 37.7      | 84       | 20       | 103/053   |
|        |         | Sevuparin/DF02+Malanil | D1H6      | 39.6      | 84       | 22       | 130/089   |
|        |         | Sevuparin/DF02+Malanil | D1H12     | 37.2      | 60       | 22       | 110/070   |
|        |         | Sevuparin/DF02+Malanil | D1H18     | 38.6      | 84       | 22       | 117/056   |
|        |         | Sevuparin/DF02+Malanil | D2H24     | 38.5      | 84       | 20       | 106/056   |
|        |         | Sevuparin/DF02+Malanil | D2H30     | 37.5      | 78       | 20       | 101/054   |
|        |         | Sevuparin/DF02+Malanil | D2H36     | 38.5      | 78       | 22       | 105/055   |
|        |         | Sevuparin/DF02+Malanil | D2H42     | 36.6      | 74       | 20       | 110/070   |
|        |         | Sevuparin/DF02+Malanil | D3H48     | 37        | 72       | 20       | 094/062   |
|        |         | Sevuparin/DF02+Malanil | D3H54     | 36.7      | 72       | 20       | 095/057   |
|        |         | Sevuparin/DF02+Malanil | D3H60     | 36.8      | 62       | 20       | 090/060   |
|        |         | Sevuparin/DF02+Malanil | D3H66     | 36        | 74       | 20       | 090/060   |
|        |         | Sevuparin/DF02+Malanil | D7        | 36.9      | 96       | 20       | 115/063   |
|        |         | Sevuparin/DF02+Malanil | D14       | 37        | 106      | 20       | 116/060   |
|        |         | Sevuparin/DF02+Malanil | screening | 37.8      | 86       | 20       | 121/056   |
|        |         | Sevuparin/DF02+Malanil | D1H0      | 37.4      | 70       | 20       | 098/054   |
|        |         | Sevuparin/DF02+Malanil | D1H6      | 36.3      | 70       | 20       | 100/060   |
|        |         | Sevuparin/DF02+Malanil | D1H12     | 37.3      | 86       | 20       | 108/063   |
|        |         | Sevuparin/DF02+Malanil | D1H18     | 36.5      | 78       | 20       | 109/059   |
|        |         | Sevuparin/DF02+Malanil | D2H24     | 38.2      | 90       | 20       | 110/060   |
|        |         | Sevuparin/DF02+Malanil | D2H30     | 37.7      | 82       | 20       | 112/054   |
|        |         | Sevuparin/DF02+Malanil | D2H36     | 37        | 90       | 20       | 090/060   |

## TSM02 Individual subject listings part 2

## CSR Appendix 16.2

| SUBJID | INITIAL | ARM                    | TIMEPOINT | TEMP (°C) | HR (bpm) | RR (bpm) | BP (mmHg) |
|--------|---------|------------------------|-----------|-----------|----------|----------|-----------|
|        |         | Sevuparin/DF02+Malanil | D2H42     | 36.3      | 64       | 20       | 110/057   |
|        |         | Sevuparin/DF02+Malanil | D3H48     | 36.7      | 74       | 20       | 098/068   |
|        |         | Sevuparin/DF02+Malanil | D3H54     | 36.6      | 76       | 20       | 108/064   |
|        |         | Sevuparin/DF02+Malanil | D3H60     | 37.2      | 62       | 20       | 090/060   |
|        |         | Sevuparin/DF02+Malanil | D3H66     | 36.2      | 56       | 20       | 090/060   |
|        |         | Sevuparin/DF02+Malanil | D7        | 36.6      | 62       | 20       | 108/056   |
|        |         | Sevuparin/DF02+Malanil | D14       | 36.3      | 78       | 20       | 100/060   |
|        |         | Malanil                | screening | 38.6      | 98       | 20       | 114/061   |
|        |         | Malanil                | D1H0      | 39.3      | 106      | 20       | 117/068   |
|        |         | Malanil                | D1H6      | 37        | 90       | 20       | 117/071   |
|        |         | Malanil                | D1H12     | 36.7      | 98       | 20       | 128/073   |
|        |         | Malanil                | D1H18     | 36.8      | 96       | 20       | 110/074   |
|        |         | Malanil                | D2H24     | 38.2      | 98       | 20       | 120/072   |
|        |         | Malanil                | D2H30     | 36.7      | 82       | 20       | 114/069   |
|        |         | Malanil                | D2H36     | 38.2      | 86       | 22       | 096/052   |
|        |         | Malanil                | D2H42     | 37.2      | 100      | 22       | 100/060   |
|        |         | Malanil                | D3H48     | 38.2      | 100      | 20       | 110/080   |
|        |         | Malanil                | D3H54     | 37.4      | 88       | 20       | 090/060   |
|        |         | Malanil                | D3H60     | 37.1      | 84       | 20       | 112/084   |
|        |         | Malanil                | D3H66     | 36.1      | 84       | 20       | 109/067   |
|        |         | Malanil                | D4H72     | 36.2      | 88       | 20       | 100/060   |
|        |         | Malanil                | D5        | 36.5      | 84       | 20       | 110/076   |
|        |         | Malanil                | D7        | 36.9      | 88       | 20       | 102/064   |
|        |         | Malanil                | D14       | 37        | 100      | 20       | 098/060   |
|        |         | Malanil                | screening | 38        | 104      | 20       | 100/060   |
|        |         | Malanil                | D1H0      | 38.1      | 110      | 22       | 104/058   |
|        |         | Malanil                | D1H6      | 38.4      | 102      | 20       | 108/065   |
|        |         | Malanil                | D1H12     | 38        | 100      | 20       | 106/062   |
|        |         | Malanil                | D1H18     | 36.7      | 88       | 20       | 100/061   |
|        |         | Malanil                | D2H24     | 37        | 100      | 20       | 108/060   |
|        |         | Malanil                | D2H30     | 38.2      | 106      | 20       | 100/066   |
|        |         | Malanil                | D2H36     | 36.8      | 96       | 20       | 100/067   |
|        |         | Malanil                | D2H42     | 38.6      | 92       | 20       | 116/071   |
|        |         | Malanil                | D3H48     | 37.2      | 92       | 20       | 112/063   |
|        |         | Malanil                | D3H54     | 38.8      | 96       | 20       | 122/068   |
|        |         | Malanil                | D3H60     | 37        | 74       | 20       | 113/064   |
|        |         | Malanil                | D3H66     | 36.5      | 82       | 20       | 117/062   |

## TSM02 Individual subject listings part 2

## CSR Appendix 16.2

| <b>SUBJID</b> | <b>INITIAL</b> | <b>ARM</b> | <b>TIMEPOINT</b> | <b>TEMP<br/>(°C)</b> | <b>HR<br/>(bpm)</b> | <b>RR<br/>(bpm)</b> | <b>BP<br/>(mmHg)</b> |
|---------------|----------------|------------|------------------|----------------------|---------------------|---------------------|----------------------|
|               |                | Malanil    | D7               | 36.7                 | 86                  | 20                  | 119/064              |
|               |                | Malanil    | D14              | 36                   | 96                  | 20                  | 132/074              |
|               |                | Malanil    | screening        | 38.9                 | 100                 | 20                  | 112/060              |
|               |                | Malanil    | D1H0             | 39.3                 | 98                  | 20                  | 134/060              |
|               |                | Malanil    | D1H6             | 37.9                 | 96                  | 22                  | 111/062              |
|               |                | Malanil    | D1H12            | 36.6                 | 86                  | 20                  | 107/065              |
|               |                | Malanil    | D1H18            | 36.7                 | 84                  | 20                  | 107/062              |
|               |                | Malanil    | D2H24            | 36.1                 | 80                  | 20                  | 106/063              |
|               |                | Malanil    | D2H30            | 38.1                 | 88                  | 20                  | 107/055              |
|               |                | Malanil    | D2H36            | 37.6                 | 82                  | 20                  | 100/054              |
|               |                | Malanil    | D2H42            | 39                   | 92                  | 22                  | 098/056              |
|               |                | Malanil    | D3H48            | 37.8                 | 78                  | 20                  | 087/053              |
|               |                | Malanil    | D3H54            | 37.1                 | 80                  | 20                  | 101/059              |
|               |                | Malanil    | D3H60            | 36.7                 | 74                  | 20                  | 115/052              |
|               |                | Malanil    | D3H66            | 36.2                 | 66                  | 20                  | 097/057              |
|               |                | Malanil    | D4H72            | 36.7                 | 82                  | 20                  | 107/065              |
|               |                | Malanil    | D5               | 36.5                 | 68                  | 20                  | 110/062              |
|               |                | Malanil    | D7               | 36.6                 | 86                  | 20                  | 110/060              |
|               |                | Malanil    | D14              | 36.8                 | 96                  | 20                  | 100/060              |



## TSM02 Individual subject listings part 2

## CSR Appendix 16.2

## 16.2.7.5 ECG

| USUBJID | INITIAL | ARM                    | TIMEPOINT | QTCmsec | RESULT | RESOTHER |
|---------|---------|------------------------|-----------|---------|--------|----------|
|         |         | Malanil                | screening | 397     | Normal |          |
|         |         | Malanil                | D1        | 399     | Normal |          |
|         |         | Malanil                | D3        | 406     | Normal |          |
|         |         | Sevuparin/DF02+Malanil | screening | 428     | Normal |          |
|         |         | Sevuparin/DF02+Malanil | D1        | 417     | Normal |          |
|         |         | Sevuparin/DF02+Malanil | D3        | 409     | Normal |          |
|         |         | Sevuparin/DF02+Malanil | screening | 412     | Normal |          |
|         |         | Sevuparin/DF02+Malanil | D1        | 435     | Normal |          |
|         |         | Sevuparin/DF02+Malanil | D3        | 420     | Normal |          |
|         |         | Malanil                | screening | 438     | Normal |          |
|         |         | Malanil                | D1        | 416     | Normal |          |
|         |         | Malanil                | D3        | 439     | Normal |          |
|         |         | Malanil                | screening | 394     | Normal |          |
|         |         | Malanil                | D1        | 398     | Normal |          |
|         |         | Malanil                | D3        | 399     | Normal |          |
|         |         | Sevuparin/DF02+Malanil | screening | 399     | Normal |          |
|         |         | Sevuparin/DF02+Malanil | D1        | 399     | Normal |          |
|         |         | Sevuparin/DF02+Malanil | D3        | 428     | Normal |          |
|         |         | Malanil                | screening | 398     | Normal |          |
|         |         | Malanil                | D1        | 394     | Normal |          |
|         |         | Malanil                | D3        | 427     | Normal |          |
|         |         | Sevuparin/DF02+Malanil | screening | 408     | Normal |          |
|         |         | Sevuparin/DF02+Malanil | D1        | 395     | Normal |          |
|         |         | Sevuparin/DF02+Malanil | D3        | 397     | Normal |          |
|         |         | Sevuparin/DF02+Malanil | screening | 419     | Normal |          |
|         |         | Sevuparin/DF02+Malanil | D1        | 407     | Normal |          |
|         |         | Sevuparin/DF02+Malanil | D3        | 419     | Normal |          |
|         |         | Malanil                | screening | 411     | Normal |          |
|         |         | Malanil                | D1        | 407     | Normal |          |
|         |         | Malanil                | D3        | 417     | Normal |          |
|         |         | Malanil                | screening | 379     | Normal |          |
|         |         | Malanil                | D1        | 365     | Normal |          |
|         |         | Malanil                | D3        | 400     | Normal |          |
|         |         | Sevuparin/DF02+Malanil | screening | 425     | Normal |          |
|         |         | Sevuparin/DF02+Malanil | D1        | 427     | Normal |          |

## TSM02 Individual subject listings part 2

## CSR Appendix 16.2

| USUBJID | INITIAL | ARM                    | TIMEPOINT | QTCmsec | RESULT   | RESOTHER    |
|---------|---------|------------------------|-----------|---------|----------|-------------|
|         |         | Sevuparin/DF02+Malanil | D3        | 400     | Normal   |             |
|         |         | Sevuparin/DF02+Malanil | screening | 402     | Normal   |             |
|         |         | Sevuparin/DF02+Malanil | D1        | 392     | Normal   |             |
|         |         | Sevuparin/DF02+Malanil | D3        | 404     | Normal   |             |
|         |         | Malanil                | screening | 394     | Normal   |             |
|         |         | Malanil                | D1        | 388     | Normal   |             |
|         |         | Malanil                | D3        | 380     | Normal   |             |
|         |         | Malanil                | screening | 446     | Normal   |             |
|         |         | Malanil                | D1        | 446     | Normal   |             |
|         |         | Malanil                | D3        | 389     | Normal   |             |
|         |         | Malanil                | screening | 409     | Normal   |             |
|         |         | Malanil                | D1        | 425     | Normal   |             |
|         |         | Malanil                | D3        | 447     | Normal   |             |
|         |         | Sevuparin/DF02+Malanil | screening | 386     | Normal   |             |
|         |         | Sevuparin/DF02+Malanil | D1        | 394     | Normal   |             |
|         |         | Sevuparin/DF02+Malanil | D3        | 400     | Normal   |             |
|         |         | Sevuparin/DF02+Malanil | screening | 374     | Normal   |             |
|         |         | Sevuparin/DF02+Malanil | D1        | 412     | Normal   |             |
|         |         | Sevuparin/DF02+Malanil | D3        | 420     | Normal   |             |
|         |         | Sevuparin/DF02+Malanil | screening | 387     | Normal   |             |
|         |         | Sevuparin/DF02+Malanil | D1        | 387     | Normal   |             |
|         |         | Sevuparin/DF02+Malanil | D3        | 432     | Normal   |             |
|         |         | Malanil                | screening | 436     | Normal   |             |
|         |         | Malanil                | D1        | 445     | Normal   |             |
|         |         | Malanil                | D3        | 448     | Normal   |             |
|         |         | Sevuparin/DF02+Malanil | screening | 363     | Normal   |             |
|         |         | Sevuparin/DF02+Malanil | D1        | 362     | Normal   |             |
|         |         | Sevuparin/DF02+Malanil | D3        | 400     | Normal   |             |
|         |         | Sevuparin/DF02+Malanil | screening | 404     | Normal   |             |
|         |         | Sevuparin/DF02+Malanil | D1        | 438     | Normal   |             |
|         |         | Sevuparin/DF02+Malanil | D3        | 456     | Abnormal | QTC PROLONG |
|         |         | Sevuparin/DF02+Malanil | screening | 412     | Normal   |             |
|         |         | Sevuparin/DF02+Malanil | D1        | 408     | Normal   |             |
|         |         | Sevuparin/DF02+Malanil | D3        | 398     | Normal   |             |
|         |         | Sevuparin/DF02+Malanil | screening | 392     | Normal   |             |
|         |         | Sevuparin/DF02+Malanil | D1        | 392     | Normal   |             |
|         |         | Sevuparin/DF02+Malanil | D3        | 424     | Normal   |             |

## TSM02 Individual subject listings part 2

## CSR Appendix 16.2

| USUBJID | INITIAL | ARM                    | TIMEPOINT | QTCmsec | RESULT   | RESOTHER             |
|---------|---------|------------------------|-----------|---------|----------|----------------------|
|         |         | Malanil                | screening | 438     | Normal   |                      |
|         |         | Malanil                | D1        | 436     | Normal   |                      |
|         |         | Malanil                | D3        | 445     | Abnormal | PVC                  |
|         |         | Malanil                | screening | 429     | Normal   |                      |
|         |         | Malanil                | D1        | 420     | Normal   |                      |
|         |         | Malanil                | D3        | 431     | Normal   |                      |
|         |         | Malanil                | screening | 426     | Normal   |                      |
|         |         | Malanil                | D1        | 430     | Normal   |                      |
|         |         | Malanil                | D3        | 427     | Normal   |                      |
|         |         | Sevuparin/DF02+Malanil | screening | 409     | Normal   |                      |
|         |         | Sevuparin/DF02+Malanil | D1        | 395     | Normal   |                      |
|         |         | Sevuparin/DF02+Malanil | D3        | 425     | Normal   |                      |
|         |         | Malanil                | screening | 415     | Normal   |                      |
|         |         | Malanil                | D1        | 475     | Abnormal | QTC PROLONG          |
|         |         | Malanil                | D3        | 538     | Abnormal | QTC PROLONG          |
|         |         | Malanil                | screening | 407     | Normal   |                      |
|         |         | Malanil                | D1        | 383     | Normal   |                      |
|         |         | Malanil                | D3        | 447     | Normal   |                      |
|         |         | Malanil                | screening | 448     | Normal   |                      |
|         |         | Malanil                | D1        | 428     | Normal   |                      |
|         |         | Malanil                | D3        | 442     | Normal   |                      |
|         |         | Malanil                | screening | 391     | Normal   |                      |
|         |         | Malanil                | D1        | 389     | Normal   |                      |
|         |         | Malanil                | D3        | 408     | Normal   |                      |
|         |         | Sevuparin/DF02+Malanil | screening | 376     | Normal   |                      |
|         |         | Sevuparin/DF02+Malanil | D1        | 373     | Normal   |                      |
|         |         | Sevuparin/DF02+Malanil | D3        | 400     | Normal   |                      |
|         |         | Malanil                | screening | 389     | Normal   |                      |
|         |         | Malanil                | D1        | 389     | Normal   |                      |
|         |         | Malanil                | D3        | 413     | Normal   |                      |
|         |         | Malanil                | screening | 437     | Normal   |                      |
|         |         | Malanil                | D1        | 403     | Normal   |                      |
|         |         | Malanil                | D3        | 437     | Abnormal | SINUS<br>BRADYCARDIA |
|         |         | Malanil                | screening | 402     | Normal   |                      |
|         |         | Malanil                | D1        | 400     | Normal   |                      |
|         |         | Malanil                | D3        | 420     | Normal   |                      |
|         |         | Sevuparin/DF02+Malanil | screening | 446     | Normal   |                      |

## TSM02 Individual subject listings part 2

## CSR Appendix 16.2

| USUBJID | INITIAL | ARM                    | TIMEPOINT | QTCmsec | RESULT   | RESOTHER                              |
|---------|---------|------------------------|-----------|---------|----------|---------------------------------------|
|         |         | Sevuparin/DF02+Malanil | D1        | 445     | Normal   |                                       |
|         |         | Sevuparin/DF02+Malanil | D3        | 457     | Abnormal | QTC PROLONG<br>BUT NOT<br>SIGNIFICANT |
|         |         | Sevuparin/DF02+Malanil | screening | 401     | Normal   |                                       |
|         |         | Sevuparin/DF02+Malanil | D1        | 385     | Normal   |                                       |
|         |         | Sevuparin/DF02+Malanil | D3        | 396     | Normal   |                                       |
|         |         | Sevuparin/DF02+Malanil | screening | 381     | Normal   |                                       |
|         |         | Sevuparin/DF02+Malanil | D1        | 409     | Normal   |                                       |
|         |         | Sevuparin/DF02+Malanil | D3        | 431     | Normal   |                                       |
|         |         | Sevuparin/DF02+Malanil | screening | 395     | Normal   |                                       |
|         |         | Sevuparin/DF02+Malanil | D1        | 409     | Normal   |                                       |
|         |         | Sevuparin/DF02+Malanil | D3        | 408     | Normal   |                                       |
|         |         | Sevuparin/DF02+Malanil | screening | 390     | Normal   |                                       |
|         |         | Sevuparin/DF02+Malanil | D1        | 390     | Normal   |                                       |
|         |         | Sevuparin/DF02+Malanil | D3        | 407     | Normal   |                                       |
|         |         | Malanil                | screening | 395     | Normal   |                                       |
|         |         | Malanil                | D1        | 389     | Normal   |                                       |
|         |         | Malanil                | D3        | 391     | Normal   |                                       |
|         |         | Malanil                | screening | 366     | Normal   |                                       |
|         |         | Malanil                | D1        | 370     | Normal   |                                       |
|         |         | Malanil                | D3        | 392     | Normal   |                                       |
|         |         | Malanil                | screening | 373     | Normal   |                                       |
|         |         | Malanil                | D1        | 401     | Normal   |                                       |
|         |         | Malanil                | D3        | 422     | Normal   |                                       |

## TSM02 Individual subject listings part 2

## CSR Appendix 16.2

## 16.2.8 Listing of individual laboratory measurements by subject

## 16.2.8.1 Haematology

| SUBJID | INITIAL | ARM                        | DAY | RBC<br>(10 <sup>6</sup> /μL)<br><i>99=Not available</i> | HCT<br>(%)<br><i>99=Not available</i> | HB<br>(g/dL)<br><i>99=Not available</i> | MCV<br>(fL)<br><i>999=Not available</i> | MCH<br>(pg/cell)<br><i>999=Not available</i> | MCHC<br>(pg/cell)<br><i>999=Not available</i> | WBC<br>(10 <sup>3</sup> /μL)<br><i>99=Not available</i> | NEU<br>(%)<br><i>999=Not available</i> | LYM<br>(%)<br><i>999=Not available</i> | MON<br>(%)<br><i>999=Not available</i> | EOS<br>(%)<br><i>999=Not available</i> | PLT<br>(10 <sup>3</sup> /μL)<br><i>999=Not available</i> |
|--------|---------|----------------------------|-----|---------------------------------------------------------|---------------------------------------|-----------------------------------------|-----------------------------------------|----------------------------------------------|-----------------------------------------------|---------------------------------------------------------|----------------------------------------|----------------------------------------|----------------------------------------|----------------------------------------|----------------------------------------------------------|
|        |         | Malanil                    | 1   | 4.2                                                     | 36.2                                  | 12.7                                    | 85.9                                    | 30.1                                         | 35                                            | 7.5                                                     | 62                                     | 26                                     | 6                                      | 6                                      | 132                                                      |
|        |         | Malanil                    | 2   | 3.7                                                     | 32.5                                  | 11.4                                    | 87.1                                    | 30.5                                         | 35                                            | 5.3                                                     | 64                                     | 25                                     | 5                                      | 4                                      | 101                                                      |
|        |         | Malanil                    | 3   | 3.8                                                     | 33.2                                  | 11.8                                    | 86.6                                    | 30.9                                         | 35.7                                          | 5.2                                                     | 58                                     | 32                                     | 5                                      | 5                                      | 121                                                      |
|        |         | Sevuparin/DF02+<br>Malanil | 1   | 4.9                                                     | 31.5                                  | 10.1                                    | 65                                      | 20.9                                         | 32.2                                          | 4.8                                                     | 49                                     | 32                                     | 2                                      | 15                                     | 184                                                      |
|        |         | Sevuparin/DF02+<br>Malanil | 2   | 4.7                                                     | 30.4                                  | 9.9                                     | 65.4                                    | 21.2                                         | 32.4                                          | 4.5                                                     | 45                                     | 38                                     | 4                                      | 11                                     | 125                                                      |
|        |         | Sevuparin/DF02+<br>Malanil | 3   | 4.5                                                     | 29.9                                  | 9.5                                     | 66.1                                    | 21                                           | 31.7                                          | 5.2                                                     | 32                                     | 38                                     | 3                                      | 25                                     | 168                                                      |
|        |         | Sevuparin/DF02+<br>Malanil | 7   | 4.6                                                     | 29.8                                  | 9.6                                     | 64.7                                    | 21                                           | 31.7                                          | 6.9                                                     | 34                                     | 50                                     | 2                                      | 14                                     | 199                                                      |
|        |         | Sevuparin/DF02+<br>Malanil | 14  | 4.5                                                     | 28.9                                  | 9.6                                     | 63.9                                    | 21.2                                         | 33.1                                          | 5.3                                                     | 32                                     | 51                                     | 5                                      | 10                                     | 150                                                      |
|        |         | Sevuparin/DF02+<br>Malanil | 1   | 4.1                                                     | 34.1                                  | 11.7                                    | 74.7                                    | 25.7                                         | 34.4                                          | 5.6                                                     | 65                                     | 26                                     | 3                                      | 3                                      | 76                                                       |
|        |         | Sevuparin/DF02+<br>Malanil | 2   | 3.9                                                     | 30.7                                  | 10.6                                    | 75                                      | 25.7                                         | 34.3                                          | 4.7                                                     | 61                                     | 30                                     | 4                                      | 4                                      | 81                                                       |
|        |         | Sevuparin/DF02+<br>Malanil | 3   | 3.9                                                     | 29.1                                  | 10.3                                    | 73.7                                    | 26                                           | 35.2                                          | 4.5                                                     | 44                                     | 45                                     | 3                                      | 4                                      | 78                                                       |
|        |         | Sevuparin/DF02+<br>Malanil | 7   | 4.3                                                     | 32.6                                  | 11                                      | 75.6                                    | 25.5                                         | 33.7                                          | 7.6                                                     | 54                                     | 36                                     | 0                                      | 10                                     | 248                                                      |

## TSM02 Individual subject listings part 2

## CSR Appendix 16.2

| SUBJID | INITIAL | ARM                        | DAY | RBC<br>(10 <sup>6</sup> /μL)<br><i>99=Not<br/>avalible</i> | HCT<br>(%)<br><i>99=Not<br/>avalible</i> | HB<br>(g/dL)<br><i>99=Not<br/>avalible</i> | MCV<br>(fL)<br><i>999=Not<br/>avalible</i> | MCH<br>(pg/cell)<br><i>999=Not<br/>avalible</i> | MCHC<br>(pg/cell)<br><i>999=Not<br/>avalible</i> | WBC<br>(10 <sup>3</sup> / μL)<br><i>99=Not<br/>avalible</i> | NEU<br>(%)<br><i>999=Not<br/>avalible</i> | LYM<br>(%)<br><i>999=Not<br/>avalible</i> | MON<br>(%)<br><i>999=Not<br/>avalible</i> | EOS<br>(%)<br><i>999=Not<br/>avalible</i> | PLT<br>(10 <sup>3</sup> / μL)<br><i>999=Not<br/>avalible</i> |
|--------|---------|----------------------------|-----|------------------------------------------------------------|------------------------------------------|--------------------------------------------|--------------------------------------------|-------------------------------------------------|--------------------------------------------------|-------------------------------------------------------------|-------------------------------------------|-------------------------------------------|-------------------------------------------|-------------------------------------------|--------------------------------------------------------------|
|        |         | Sevuparin/DF02+<br>Malanil | 14  | 4.4                                                        | 33.1                                     | 11.1                                       | 76.2                                       | 25.6                                            | 33.6                                             | 7.4                                                         | 46                                        | 49                                        | 1                                         | 4                                         | 193                                                          |
|        |         | Malanil                    | 1   | 5.3                                                        | 39.6                                     | 13.2                                       | 74.9                                       | 25                                              | 33.4                                             | 5.4                                                         | 60                                        | 25                                        | 6                                         | 4                                         | 122                                                          |
|        |         | Malanil                    | 2   | 4.8                                                        | 35.6                                     | 11.8                                       | 74.3                                       | 24.6                                            | 33.2                                             | 3.4                                                         | 50                                        | 35                                        | 5                                         | 8                                         | 104                                                          |
|        |         | Malanil                    | 3   | 4.7                                                        | 34.5                                     | 11.4                                       | 74.2                                       | 24.6                                            | 33.1                                             | 3.8                                                         | 37                                        | 45                                        | 8                                         | 10                                        | 159                                                          |
|        |         | Malanil                    | 7   | 4.9                                                        | 36.5                                     | 12.4                                       | 74.4                                       | 25.2                                            | 33.8                                             | 8.4                                                         | 57                                        | 36                                        | 2                                         | 3                                         | 321                                                          |
|        |         | Malanil                    | 14  | 5                                                          | 36.6                                     | 12                                         | 73.8                                       | 24.2                                            | 32.8                                             | 5.5                                                         | 45                                        | 45                                        | 3                                         | 5                                         | 337                                                          |
|        |         | Malanil                    | 1   | 3.5                                                        | 33                                       | 12.4                                       | 94.6                                       | 35.6                                            | 37.6                                             | 7.7                                                         | 76                                        | 17                                        | 4                                         | 1                                         | 180                                                          |
|        |         | Malanil                    | 2   | 3.1                                                        | 29.2                                     | 11                                         | 94.7                                       | 35.6                                            | 37.5                                             | 5.3                                                         | 52                                        | 35                                        | 4                                         | 6                                         | 111                                                          |
|        |         | Malanil                    | 3   | 2.9                                                        | 27.1                                     | 10.3                                       | 94.9                                       | 36.1                                            | 38.1                                             | 4.8                                                         | 50                                        | 45                                        | 2                                         | 3                                         | 98                                                           |
|        |         | Malanil                    | 7   | 3.4                                                        | 32.5                                     | 11.8                                       | 96.1                                       | 35                                              | 36.4                                             | 7.4                                                         | 58                                        | 33                                        | 2                                         | 4                                         | 202                                                          |
|        |         | Malanil                    | 14  | 3.7                                                        | 34.9                                     | 12.3                                       | 86.4                                       | 32.2                                            | 34.8                                             | 7                                                           | 60                                        | 32                                        | 2                                         | 6                                         | 236                                                          |
|        |         | Sevuparin/DF02+<br>Malanil | 1   | 5.2                                                        | 42.3                                     | 14.5                                       | 80.9                                       | 27.8                                            | 34.4                                             | 3.7                                                         | 82                                        | 12                                        | 2                                         | 2                                         | 66                                                           |
|        |         | Sevuparin/DF02+<br>Malanil | 2   | 4.9                                                        | 38.9                                     | 13.4                                       | 79.8                                       | 27.4                                            | 34.3                                             | 3.6                                                         | 45                                        | 42                                        | 3                                         | 7                                         | 79                                                           |
|        |         | Sevuparin/DF02+<br>Malanil | 3   | 4.6                                                        | 36.6                                     | 12.2                                       | 80.2                                       | 26.8                                            | 33.4                                             | 3.5                                                         | 45                                        | 43                                        | 3                                         | 7                                         | 74                                                           |
|        |         | Sevuparin/DF02+<br>Malanil | 7   | 4.2                                                        | 34                                       | 13                                         | 80.5                                       | 30.7                                            | 38.2                                             | 5.7                                                         | 55                                        | 37                                        | 3                                         | 5                                         | 171                                                          |
|        |         | Sevuparin/DF02+<br>Malanil | 14  | 4.5                                                        | 36.9                                     | 12.6                                       | 81.3                                       | 27.8                                            | 34.2                                             | 7.2                                                         | 51                                        | 40                                        | 3                                         | 6                                         | 167                                                          |
|        |         | Malanil                    | 1   | 4.6                                                        | 33.2                                     | 11.4                                       | 71.5                                       | 24.5                                            | 34.3                                             | 4.3                                                         | 62                                        | 30                                        | 3                                         | 2                                         | 56                                                           |
|        |         | Malanil                    | 2   | 4.2                                                        | 29.6                                     | 10.5                                       | 69.9                                       | 24.8                                            | 35.4                                             | 3.6                                                         | 36                                        | 51                                        | 7                                         | 2                                         | 64                                                           |

## TSM02 Individual subject listings part 2

## CSR Appendix 16.2

| SUBJID | INITIAL | ARM                        | DAY | RBC<br>(10 <sup>6</sup> /μL)<br><i>99=Not available</i> | HCT<br>(%)<br><i>99=Not available</i> | HB<br>(g/dL)<br><i>99=Not available</i> | MCV<br>(fL)<br><i>999=Not available</i> | MCH<br>(pg/cell)<br><i>999=Not available</i> | MCHC<br>(pg/cell)<br><i>999=Not available</i> | WBC<br>(10 <sup>3</sup> / μL)<br><i>99=Not available</i> | NEU<br>(%)<br><i>999=Not available</i> | LYM<br>(%)<br><i>999=Not available</i> | MON<br>(%)<br><i>999=Not available</i> | EOS<br>(%)<br><i>999=Not available</i> | PLT<br>(10 <sup>3</sup> / μL)<br><i>999=Not available</i> |
|--------|---------|----------------------------|-----|---------------------------------------------------------|---------------------------------------|-----------------------------------------|-----------------------------------------|----------------------------------------------|-----------------------------------------------|----------------------------------------------------------|----------------------------------------|----------------------------------------|----------------------------------------|----------------------------------------|-----------------------------------------------------------|
|        |         | Malanil                    | 3   | 4.4                                                     | 31.2                                  | 11.1                                    | 70.8                                    | 25.2                                         | 35.6                                          | 4.4                                                      | 46                                     | 43                                     | 5                                      | 2                                      | 68                                                        |
|        |         | Malanil                    | 7   | 4.6                                                     | 33.1                                  | 11                                      | 72.3                                    | 24.1                                         | 33.3                                          | 6.3                                                      | 49                                     | 43                                     | 4                                      | 3                                      | 197                                                       |
|        |         | Sevuparin/DF02+<br>Malanil | 1   | 5.2                                                     | 41.3                                  | 14                                      | 78.7                                    | 26.7                                         | 33.9                                          | 6.5                                                      | 74                                     | 17                                     | 3                                      | 5                                      | 154                                                       |
|        |         | Sevuparin/DF02+<br>Malanil | 2   | 4.6                                                     | 35.3                                  | 12.4                                    | 77.5                                    | 27.2                                         | 35.1                                          | 5.2                                                      | 70                                     | 20                                     | 6                                      | 4                                      | 86                                                        |
|        |         | Sevuparin/DF02+<br>Malanil | 3   | 4.8                                                     | 37.2                                  | 12.8                                    | 76.9                                    | 26.4                                         | 34.3                                          | 5.2                                                      | 59                                     | 27                                     | 7                                      | 5                                      | 98                                                        |
|        |         | Sevuparin/DF02+<br>Malanil | 7   | 4.8                                                     | 37.3                                  | 13.2                                    | 77.9                                    | 27.5                                         | 35.3                                          | 11.5                                                     | 75                                     | 19                                     | 4                                      | 2                                      | 239                                                       |
|        |         | Sevuparin/DF02+<br>Malanil | 14  | 5.4                                                     | 41.6                                  | 13.9                                    | 77.5                                    | 25.8                                         | 33.4                                          | 7.7                                                      | 66                                     | 27                                     | 4                                      | 3                                      | 318                                                       |
|        |         | Sevuparin/DF02+<br>Malanil | 1   | 4.6                                                     | 36.4                                  | 12.6                                    | 72.7                                    | 25.1                                         | 34.5                                          | 8.3                                                      | 74                                     | 20                                     | 3                                      | 1                                      | 114                                                       |
|        |         | Sevuparin/DF02+<br>Malanil | 2   | 4                                                       | 28.5                                  | 9.9                                     | 71.6                                    | 24.9                                         | 34.8                                          | 5                                                        | 52                                     | 40                                     | 6                                      | 1                                      | 81                                                        |
|        |         | Sevuparin/DF02+<br>Malanil | 3   | 4.1                                                     | 29.6                                  | 10.1                                    | 72.4                                    | 24.6                                         | 34                                            | 4.4                                                      | 61                                     | 32                                     | 4                                      | 3                                      | 71                                                        |
|        |         | Sevuparin/DF02+<br>Malanil | 7   | 4                                                       | 28.7                                  | 9.6                                     | 72.4                                    | 24.3                                         | 33.6                                          | 5.8                                                      | 54                                     | 40                                     | 4                                      | 2                                      | 228                                                       |
|        |         | Sevuparin/DF02+<br>Malanil | 14  | 4.2                                                     | 32                                    | 10.5                                    | 76.2                                    | 24.9                                         | 32.7                                          | 6.2                                                      | 48                                     | 45                                     | 4                                      | 3                                      | 311                                                       |
|        |         | Malanil                    | 1   | 5.4                                                     | 35.6                                  | 11.6                                    | 65.4                                    | 21.2                                         | 32.5                                          | 7.7                                                      | 64                                     | 28                                     | 4                                      | 4                                      | 207                                                       |
|        |         | Malanil                    | 2   | 5.2                                                     | 33.8                                  | 11.1                                    | 65                                      | 21.4                                         | 32.9                                          | 5                                                        | 54                                     | 37                                     | 4                                      | 5                                      | 158                                                       |
|        |         | Malanil                    | 3   | 5.4                                                     | 34.6                                  | 11.4                                    | 64.4                                    | 21.1                                         | 32.9                                          | 5                                                        | 55                                     | 40                                     | 3                                      | 2                                      | 154                                                       |

TSM02 Individual subject listings part 2

CSR Appendix 16.2

| SUBJID | INITIAL | ARM                        | DAY | RBC<br>(10 <sup>6</sup> /μL)<br><i>99=Not available</i> | HCT<br>(%)<br><i>99=Not available</i> | HB<br>(g/dL)<br><i>99=Not available</i> | MCV<br>(fL)<br><i>999=Not available</i> | MCH<br>(pg/cell)<br><i>999=Not available</i> | MCHC<br>(pg/cell)<br><i>999=Not available</i> | WBC<br>(10 <sup>3</sup> / μL)<br><i>99=Not available</i> | NEU<br>(%)<br><i>999=Not available</i> | LYM<br>(%)<br><i>999=Not available</i> | MON<br>(%)<br><i>999=Not available</i> | EOS<br>(%)<br><i>999=Not available</i> | PLT<br>(10 <sup>3</sup> / μL)<br><i>999=Not available</i> |
|--------|---------|----------------------------|-----|---------------------------------------------------------|---------------------------------------|-----------------------------------------|-----------------------------------------|----------------------------------------------|-----------------------------------------------|----------------------------------------------------------|----------------------------------------|----------------------------------------|----------------------------------------|----------------------------------------|-----------------------------------------------------------|
|        |         | Malanil                    | 7   | 5.1                                                     | 33.6                                  | 11.2                                    | 65.6                                    | 21.8                                         | 33.3                                          | 8.2                                                      | 54                                     | 37                                     | 4                                      | 5                                      | 294                                                       |
|        |         | Malanil                    | 14  | 5.4                                                     | 35.7                                  | 11.5                                    | 66.3                                    | 21.4                                         | 32.3                                          | 8.6                                                      | 64                                     | 31                                     | 3                                      | 2                                      | 271                                                       |
|        |         | Malanil                    | 1   | 4.3                                                     | 35.5                                  | 12.3                                    | 82.5                                    | 28.5                                         | 34.6                                          | 4.9                                                      | 70                                     | 24                                     | 4                                      | 2                                      | 93                                                        |
|        |         | Malanil                    | 2   | 4                                                       | 32.6                                  | 11.4                                    | 81.7                                    | 28.6                                         | 35                                            | 4                                                        | 53                                     | 40                                     | 5                                      | 2                                      | 98                                                        |
|        |         | Malanil                    | 3   | 4                                                       | 33.2                                  | 11.4                                    | 82.3                                    | 28.2                                         | 34.2                                          | 5.2                                                      | 61                                     | 33                                     | 4                                      | 2                                      | 122                                                       |
|        |         | Malanil                    | 7   | 4.2                                                     | 35.1                                  | 12.1                                    | 82.8                                    | 28.5                                         | 34.4                                          | 8.1                                                      | 68                                     | 25                                     | 5                                      | 2                                      | 255                                                       |
|        |         | Malanil                    | 14  | 4.8                                                     | 34.7                                  | 12                                      | 72.7                                    | 25.2                                         | 34.6                                          | 4.6                                                      | 60                                     | 35                                     | 3                                      | 2                                      | 180                                                       |
|        |         | Sevuparin/DF02+<br>Malanil | 1   | 4.3                                                     | 35.4                                  | 12.2                                    | 81.7                                    | 28.1                                         | 34.4                                          | 3.2                                                      | 42                                     | 50                                     | 5                                      | 3                                      | 58                                                        |
|        |         | Sevuparin/DF02+<br>Malanil | 2   | 4.2                                                     | 34                                    | 11.8                                    | 81                                      | 28.1                                         | 34.7                                          | 3                                                        | 44                                     | 40                                     | 8                                      | 4                                      | 65                                                        |
|        |         | Sevuparin/DF02+<br>Malanil | 3   | 4.2                                                     | 33.8                                  | 11.7                                    | 81                                      | 28.1                                         | 34.6                                          | 3.4                                                      | 43                                     | 44                                     | 7                                      | 2                                      | 70                                                        |
|        |         | Sevuparin/DF02+<br>Malanil | 7   | 4                                                       | 32.5                                  | 11.1                                    | 82.1                                    | 27.9                                         | 34                                            | 3                                                        | 45                                     | 48                                     | 5                                      | 2                                      | 170                                                       |
|        |         | Sevuparin/DF02+<br>Malanil | 1   | 5.3                                                     | 36                                    | 11.6                                    | 68                                      | 21.9                                         | 32.2                                          | 4.7                                                      | 79                                     | 18                                     | 1                                      | 2                                      | 77                                                        |
|        |         | Sevuparin/DF02+<br>Malanil | 2   | 4.7                                                     | 31.1                                  | 10.2                                    | 66.6                                    | 21.8                                         | 32.8                                          | 2.2                                                      | 66                                     | 27                                     | 5                                      | 2                                      | 35                                                        |
|        |         | Sevuparin/DF02+<br>Malanil | 3   | 4.5                                                     | 29.6                                  | 9.8                                     | 66.6                                    | 22                                           | 33.1                                          | 2.2                                                      | 50                                     | 38                                     | 8                                      | 4                                      | 36                                                        |
|        |         | Sevuparin/DF02+<br>Malanil | 7   | 4.5                                                     | 30.6                                  | 9.8                                     | 67.7                                    | 21.7                                         | 32.1                                          | 5                                                        | 57                                     | 30                                     | 7                                      | 6                                      | 160                                                       |
|        |         | Sevuparin/DF02+<br>Malanil | 14  | 4.9                                                     | 33.2                                  | 10.5                                    | 68.4                                    | 21.7                                         | 31.8                                          | 6.4                                                      | 62                                     | 30                                     | 4                                      | 4                                      | 237                                                       |



## TSM02 Individual subject listings part 2

## CSR Appendix 16.2

| SUBJID | INITIAL | ARM                        | DAY | RBC<br>(10 <sup>6</sup> /μL)<br><i>99=Not available</i> | HCT<br>(%)<br><i>99=Not available</i> | HB<br>(g/dL)<br><i>99=Not available</i> | MCV<br>(fL)<br><i>999=Not available</i> | MCH<br>(pg/cell)<br><i>999=Not available</i> | MCHC<br>(pg/cell)<br><i>999=Not available</i> | WBC<br>(10 <sup>3</sup> / μL)<br><i>99=Not available</i> | NEU<br>(%)<br><i>999=Not available</i> | LYM<br>(%)<br><i>999=Not available</i> | MON<br>(%)<br><i>999=Not available</i> | EOS<br>(%)<br><i>999=Not available</i> | PLT<br>(10 <sup>3</sup> / μL)<br><i>999=Not available</i> |
|--------|---------|----------------------------|-----|---------------------------------------------------------|---------------------------------------|-----------------------------------------|-----------------------------------------|----------------------------------------------|-----------------------------------------------|----------------------------------------------------------|----------------------------------------|----------------------------------------|----------------------------------------|----------------------------------------|-----------------------------------------------------------|
|        |         | Malanil                    | 1   | 5.6                                                     | 45.6                                  | 15.9                                    | 80.9                                    | 28.2                                         | 34.9                                          | 5.9                                                      | 70                                     | 20                                     | 6                                      | 2                                      | 109                                                       |
|        |         | Malanil                    | 2   | 5.1                                                     | 41.5                                  | 14.6                                    | 80.8                                    | 28.3                                         | 35.1                                          | 3.9                                                      | 72                                     | 20                                     | 5                                      | 3                                      | 81                                                        |
|        |         | Malanil                    | 3   | 5.2                                                     | 41.4                                  | 14.7                                    | 79.8                                    | 28.2                                         | 35.4                                          | 4.8                                                      | 62                                     | 30                                     | 5                                      | 3                                      | 66                                                        |
|        |         | Malanil                    | 7   | 5.5                                                     | 44.5                                  | 15.5                                    | 80.6                                    | 28.1                                         | 34.8                                          | 4.8                                                      | 58                                     | 30                                     | 6                                      | 6                                      | 192                                                       |
|        |         | Malanil                    | 14  | 5.8                                                     | 47.3                                  | 16.3                                    | 81                                      | 27.9                                         | 34.4                                          | 5.5                                                      | 56                                     | 32                                     | 6                                      | 6                                      | 188                                                       |
|        |         | Malanil                    | 1   | 4.9                                                     | 40.4                                  | 14.1                                    | 82.5                                    | 28.8                                         | 35                                            | 5.1                                                      | 78                                     | 17                                     | 2                                      | 3                                      | 53                                                        |
|        |         | Malanil                    | 2   | 4.4                                                     | 35.8                                  | 12.6                                    | 82.3                                    | 28.9                                         | 35.1                                          | 5.6                                                      | 75                                     | 15                                     | 5                                      | 3                                      | 24                                                        |
|        |         | Malanil                    | 3   | 4.1                                                     | 33.5                                  | 12                                      | 81.5                                    | 29.3                                         | 36                                            | 4.7                                                      | 66                                     | 24                                     | 5                                      | 5                                      | 41                                                        |
|        |         | Malanil                    | 7   | 3.8                                                     | 31.3                                  | 11.1                                    | 83.4                                    | 29.7                                         | 35.6                                          | 4.5                                                      | 52                                     | 40                                     | 6                                      | 2                                      | 188                                                       |
|        |         | Malanil                    | 14  | 4                                                       | 33.4                                  | 11.7                                    | 84.8                                    | 29.7                                         | 35                                            | 5.5                                                      | 64                                     | 30                                     | 4                                      | 2                                      | 348                                                       |
|        |         | Malanil                    | 1   | 4.9                                                     | 37.6                                  | 12.7                                    | 76.6                                    | 25.9                                         | 33.8                                          | 4.7                                                      | 70                                     | 20                                     | 5                                      | 5                                      | 204                                                       |
|        |         | Malanil                    | 2   | 4.8                                                     | 36.5                                  | 12.5                                    | 76.3                                    | 26.1                                         | 34.2                                          | 4.8                                                      | 59                                     | 31                                     | 4                                      | 6                                      | 139                                                       |
|        |         | Malanil                    | 3   | 5.1                                                     | 39.3                                  | 13.3                                    | 76.6                                    | 25.9                                         | 33.9                                          | 4.8                                                      | 45                                     | 42                                     | 8                                      | 3                                      | 154                                                       |
|        |         | Malanil                    | 7   | 4.8                                                     | 37.8                                  | 12.5                                    | 78.2                                    | 25.8                                         | 32.9                                          | 6.2                                                      | 47                                     | 45                                     | 3                                      | 5                                      | 219                                                       |
|        |         | Malanil                    | 14  | 5.3                                                     | 41.4                                  | 13.8                                    | 77.8                                    | 26                                           | 33.5                                          | 7.8                                                      | 48                                     | 40                                     | 5                                      | 7                                      | 267                                                       |
|        |         | Sevuparin/DF02+<br>Malanil | 1   | 3.5                                                     | 30.5                                  | 10.4                                    | 87.7                                    | 30                                           | 34.3                                          | 5                                                        | 66                                     | 31                                     | 2                                      | 1                                      | 302                                                       |
|        |         | Sevuparin/DF02+<br>Malanil | 2   | 2.9                                                     | 25.5                                  | 9                                       | 87.7                                    | 30.9                                         | 35.2                                          | 4.1                                                      | 50                                     | 40                                     | 6                                      | 3                                      | 225                                                       |
|        |         | Sevuparin/DF02+<br>Malanil | 3   | 3.1                                                     | 26.8                                  | 9.4                                     | 87.1                                    | 30.4                                         | 34.9                                          | 4.8                                                      | 53                                     | 36                                     | 7                                      | 4                                      | 243                                                       |
|        |         | Sevuparin/DF02+<br>Malanil | 7   | 3.3                                                     | 28.8                                  | 10.4                                    | 87.8                                    | 31.6                                         | 36                                            | 5.7                                                      | 65                                     | 27                                     | 5                                      | 3                                      | 397                                                       |

TSM02 Individual subject listings part 2

CSR Appendix 16.2

| SUBJID | INITIAL | ARM                        | DAY | RBC<br>(10 <sup>6</sup> /μL)<br><i>99=Not available</i> | HCT<br>(%)<br><i>99=Not available</i> | HB<br>(g/dL)<br><i>99=Not available</i> | MCV<br>(fL)<br><i>999=Not available</i> | MCH<br>(pg/cell)<br><i>999=Not available</i> | MCHC<br>(pg/cell)<br><i>999=Not available</i> | WBC<br>(10 <sup>3</sup> / μL)<br><i>99=Not available</i> | NEU<br>(%)<br><i>999=Not available</i> | LYM<br>(%)<br><i>999=Not available</i> | MON<br>(%)<br><i>999=Not available</i> | EOS<br>(%)<br><i>999=Not available</i> | PLT<br>(10 <sup>3</sup> / μL)<br><i>999=Not available</i> |
|--------|---------|----------------------------|-----|---------------------------------------------------------|---------------------------------------|-----------------------------------------|-----------------------------------------|----------------------------------------------|-----------------------------------------------|----------------------------------------------------------|----------------------------------------|----------------------------------------|----------------------------------------|----------------------------------------|-----------------------------------------------------------|
|        |         | Sevuparin/DF02+<br>Malanil | 14  | 3.8                                                     | 32.9                                  | 11.2                                    | 86.7                                    | 29.5                                         | 34                                            | 5.8                                                      | 65                                     | 30                                     | 3                                      | 2                                      | 383                                                       |
|        |         | Sevuparin/DF02+<br>Malanil | 1   | 4.8                                                     | 38.4                                  | 13.4                                    | 80.3                                    | 28                                           | 34.9                                          | 4.2                                                      | 78                                     | 14                                     | 6                                      | 2                                      | 98                                                        |
|        |         | Sevuparin/DF02+<br>Malanil | 2   | 4.3                                                     | 34.2                                  | 11.9                                    | 79.4                                    | 27.6                                         | 34.7                                          | 3.3                                                      | 61                                     | 30                                     | 7                                      | 2                                      | 90                                                        |
|        |         | Sevuparin/DF02+<br>Malanil | 3   | 4.1                                                     | 32.5                                  | 11.8                                    | 78.6                                    | 28.5                                         | 36.2                                          | 3.8                                                      | 58                                     | 35                                     | 6                                      | 1                                      | 96                                                        |
|        |         | Sevuparin/DF02+<br>Malanil | 7   | 3.8                                                     | 30.3                                  | 10.8                                    | 80.2                                    | 28.5                                         | 35.6                                          | 5                                                        | 68                                     | 28                                     | 2                                      | 2                                      | 161                                                       |
|        |         | Sevuparin/DF02+<br>Malanil | 14  | 3.7                                                     | 30.2                                  | 10.6                                    | 80.9                                    | 28.3                                         | 35                                            | 5.6                                                      | 75                                     | 20                                     | 2                                      | 3                                      | 233                                                       |
|        |         | Sevuparin/DF02+<br>Malanil | 1   | 5.3                                                     | 38.8                                  | 12.8                                    | 73.9                                    | 24.4                                         | 33                                            | 5.7                                                      | 80                                     | 18                                     | 1                                      | 1                                      | 112                                                       |
|        |         | Sevuparin/DF02+<br>Malanil | 2   | 4.5                                                     | 32.2                                  | 11.1                                    | 72                                      | 24.8                                         | 34.4                                          | 4.3                                                      | 50                                     | 43                                     | 6                                      | 1                                      | 66                                                        |
|        |         | Sevuparin/DF02+<br>Malanil | 3   | 4.2                                                     | 30.1                                  | 10.4                                    | 71.8                                    | 24.8                                         | 34.5                                          | 4.4                                                      | 38                                     | 55                                     | 5                                      | 2                                      | 84                                                        |
|        |         | Sevuparin/DF02+<br>Malanil | 7   | 4.1                                                     | 29.5                                  | 10                                      | 72.1                                    | 24.5                                         | 34                                            | 5.1                                                      | 39                                     | 50                                     | 5                                      | 6                                      | 222                                                       |
|        |         | Sevuparin/DF02+<br>Malanil | 14  | 4.5                                                     | 33.1                                  | 11.1                                    | 73.8                                    | 24.8                                         | 33.6                                          | 5.4                                                      | 49                                     | 42                                     | 4                                      | 5                                      | 285                                                       |
|        |         | Malanil                    | 1   | 5.6                                                     | 43.5                                  | 15                                      | 78.1                                    | 26.9                                         | 34.5                                          | 6.3                                                      | 66                                     | 25                                     | 6                                      | 3                                      | 91                                                        |
|        |         | Malanil                    | 2   | 5.3                                                     | 41.4                                  | 14.1                                    | 78.3                                    | 26.7                                         | 34.1                                          | 4.2                                                      | 51                                     | 35                                     | 8                                      | 4                                      | 65                                                        |
|        |         | Malanil                    | 3   | 4.9                                                     | 38.3                                  | 13.5                                    | 77.5                                    | 27.3                                         | 35.2                                          | 4.3                                                      | 52                                     | 33                                     | 10                                     | 5                                      | 64                                                        |
|        |         | Malanil                    | 7   | 4.6                                                     | 36.4                                  | 12.4                                    | 79.8                                    | 27.1                                         | 34                                            | 6.1                                                      | 52                                     | 38                                     | 7                                      | 3                                      | 168                                                       |

TSM02 Individual subject listings part 2

CSR Appendix 16.2

| SUBJID | INITIAL | ARM                        | DAY | RBC<br>(10 <sup>6</sup> /μL)<br><i>99=Not available</i> | HCT<br>(%)<br><i>99=Not available</i> | HB<br>(g/dL)<br><i>99=Not available</i> | MCV<br>(fL)<br><i>999=Not available</i> | MCH<br>(pg/cell)<br><i>999=Not available</i> | MCHC<br>(pg/cell)<br><i>999=Not available</i> | WBC<br>(10 <sup>3</sup> / μL)<br><i>99=Not available</i> | NEU<br>(%)<br><i>999=Not available</i> | LYM<br>(%)<br><i>999=Not available</i> | MON<br>(%)<br><i>999=Not available</i> | EOS<br>(%)<br><i>999=Not available</i> | PLT<br>(10 <sup>3</sup> / μL)<br><i>999=Not available</i> |
|--------|---------|----------------------------|-----|---------------------------------------------------------|---------------------------------------|-----------------------------------------|-----------------------------------------|----------------------------------------------|-----------------------------------------------|----------------------------------------------------------|----------------------------------------|----------------------------------------|----------------------------------------|----------------------------------------|-----------------------------------------------------------|
|        |         | Malanil                    | 14  | 4.9                                                     | 39                                    | 12.9                                    | 79.6                                    | 26.4                                         | 33.1                                          | 5.2                                                      | 60                                     | 30                                     | 6                                      | 2                                      | 172                                                       |
|        |         | Sevuparin/DF02+<br>Malanil | 1   | 5.1                                                     | 46.3                                  | 16.4                                    | 90.7                                    | 32.1                                         | 35.4                                          | 4.1                                                      | 69                                     | 24                                     | 5                                      | 2                                      | 154                                                       |
|        |         | Sevuparin/DF02+<br>Malanil | 2   | 4.6                                                     | 41.4                                  | 14.8                                    | 89.7                                    | 32                                           | 35.8                                          | 5.3                                                      | 64                                     | 30                                     | 5                                      | 1                                      | 94                                                        |
|        |         | Sevuparin/DF02+<br>Malanil | 3   | 4.6                                                     | 40.6                                  | 14.9                                    | 88.6                                    | 32.5                                         | 36.7                                          | 5.6                                                      | 58                                     | 32                                     | 8                                      | 2                                      | 108                                                       |
|        |         | Sevuparin/DF02+<br>Malanil | 7   | 4.7                                                     | 41.6                                  | 14.7                                    | 88.4                                    | 31.2                                         | 35.3                                          | 5.9                                                      | 44                                     | 45                                     | 4                                      | 7                                      | 175                                                       |
|        |         | Sevuparin/DF02+<br>Malanil | 14  | 4.3                                                     | 38.3                                  | 13.1                                    | 88.3                                    | 30.2                                         | 34.2                                          | 9                                                        | 38                                     | 52                                     | 4                                      | 6                                      | 336                                                       |
|        |         | Sevuparin/DF02+<br>Malanil | 1   | 6.1                                                     | 37.7                                  | 12.9                                    | 62.2                                    | 21.4                                         | 34.4                                          | 9.6                                                      | 82                                     | 12                                     | 3                                      | 3                                      | 63                                                        |
|        |         | Sevuparin/DF02+<br>Malanil | 2   | 5.1                                                     | 32                                    | 10.8                                    | 62.8                                    | 21.2                                         | 33.7                                          | 5.7                                                      | 61                                     | 30                                     | 7                                      | 2                                      | 75                                                        |
|        |         | Sevuparin/DF02+<br>Malanil | 3   | 4.9                                                     | 30.2                                  | 10.6                                    | 62                                      | 21.7                                         | 35                                            | 5.2                                                      | 50                                     | 40                                     | 8                                      | 2                                      | 120                                                       |
|        |         | Sevuparin/DF02+<br>Malanil | 7   | 5.1                                                     | 32.4                                  | 11.2                                    | 63.4                                    | 21.8                                         | 34.4                                          | 10.9                                                     | 60                                     | 32                                     | 6                                      | 2                                      | 576                                                       |
|        |         | Sevuparin/DF02+<br>Malanil | 14  | 6.3                                                     | 40.3                                  | 13                                      | 63.6                                    | 20.5                                         | 32.2                                          | 13.6                                                     | 36                                     | 57                                     | 5                                      | 2                                      | 219                                                       |
|        |         | Sevuparin/DF02+<br>Malanil | 1   | 6.1                                                     | 45.6                                  | 14.9                                    | 74.4                                    | 24.4                                         | 32.8                                          | 8.3                                                      | 85                                     | 11                                     | 2                                      | 2                                      | 56                                                        |
|        |         | Sevuparin/DF02+<br>Malanil | 2   | 5.3                                                     | 38.8                                  | 12.9                                    | 73                                      | 24.3                                         | 33.3                                          | 7                                                        | 56                                     | 35                                     | 6                                      | 3                                      | 67                                                        |
|        |         | Sevuparin/DF02+<br>Malanil | 3   | 4.9                                                     | 35.7                                  | 12.2                                    | 72.3                                    | 24.7                                         | 34.2                                          | 6.6                                                      | 45                                     | 45                                     | 8                                      | 2                                      | 76                                                        |

## TSM02 Individual subject listings part 2

## CSR Appendix 16.2

| SUBJID | INITIAL | ARM                        | DAY | RBC<br>(10 <sup>6</sup> /μL)<br><i>99=Not available</i> | HCT<br>(%)<br><i>99=Not available</i> | HB<br>(g/dL)<br><i>99=Not available</i> | MCV<br>(fL)<br><i>999=Not available</i> | MCH<br>(pg/cell)<br><i>999=Not available</i> | MCHC<br>(pg/cell)<br><i>999=Not available</i> | WBC<br>(10 <sup>3</sup> / μL)<br><i>99=Not available</i> | NEU<br>(%)<br><i>999=Not available</i> | LYM<br>(%)<br><i>999=Not available</i> | MON<br>(%)<br><i>999=Not available</i> | EOS<br>(%)<br><i>999=Not available</i> | PLT<br>(10 <sup>3</sup> / μL)<br><i>999=Not available</i> |
|--------|---------|----------------------------|-----|---------------------------------------------------------|---------------------------------------|-----------------------------------------|-----------------------------------------|----------------------------------------------|-----------------------------------------------|----------------------------------------------------------|----------------------------------------|----------------------------------------|----------------------------------------|----------------------------------------|-----------------------------------------------------------|
|        |         | Malanil                    |     |                                                         |                                       |                                         |                                         |                                              |                                               |                                                          |                                        |                                        |                                        |                                        |                                                           |
|        |         | Sevuparin/DF02+<br>Malanil | 7   | 4.4                                                     | 31.8                                  | 10.7                                    | 73.2                                    | 24.7                                         | 33.7                                          | 9.5                                                      | 51                                     | 40                                     | 5                                      | 4                                      | 235                                                       |
|        |         | Sevuparin/DF02+<br>Malanil | 14  | 3.4                                                     | 27.3                                  | 9.6                                     | 81                                      | 28.3                                         | 35                                            | 10.8                                                     | 55                                     | 31                                     | 4                                      | 10                                     | 271                                                       |
|        |         | Sevuparin/DF02+<br>Malanil | 1   | 5.5                                                     | 42                                    | 13.9                                    | 76.2                                    | 25.2                                         | 33.1                                          | 7.4                                                      | 78                                     | 15                                     | 5                                      | 2                                      | 87                                                        |
|        |         | Sevuparin/DF02+<br>Malanil | 2   | 5.3                                                     | 39.3                                  | 13                                      | 74.6                                    | 24.6                                         | 33                                            | 4.7                                                      | 66                                     | 25                                     | 5                                      | 4                                      | 53                                                        |
|        |         | Sevuparin/DF02+<br>Malanil | 3   | 5                                                       | 36.9                                  | 12.5                                    | 73.7                                    | 25                                           | 33.9                                          | 6.1                                                      | 51                                     | 35                                     | 9                                      | 5                                      | 72                                                        |
|        |         | Sevuparin/DF02+<br>Malanil | 7   | 5                                                       | 36.8                                  | 12.3                                    | 74.1                                    | 24.8                                         | 33.4                                          | 7.7                                                      | 62                                     | 28                                     | 7                                      | 3                                      | 178                                                       |
|        |         | Sevuparin/DF02+<br>Malanil | 14  | 4.9                                                     | 36.6                                  | 12.2                                    | 75.2                                    | 24.9                                         | 33.2                                          | 10.5                                                     | 44                                     | 49                                     | 3                                      | 4                                      | 222                                                       |
|        |         | Malanil                    | 1   | 4.6                                                     | 33.7                                  | 11.4                                    | 73.1                                    | 24.7                                         | 33.8                                          | 4.8                                                      | 75                                     | 20                                     | 3                                      | 2                                      | 63                                                        |
|        |         | Malanil                    | 2   | 4.7                                                     | 33.9                                  | 11.4                                    | 72.4                                    | 24.3                                         | 33.7                                          | 6                                                        | 66                                     | 30                                     | 3                                      | 1                                      | 47                                                        |
|        |         | Malanil                    | 3   | 4.7                                                     | 33.9                                  | 11.4                                    | 72                                      | 24.1                                         | 33.5                                          | 6                                                        | 54                                     | 37                                     | 7                                      | 2                                      | 30                                                        |
|        |         | Malanil                    | 7   | 4.2                                                     | 30.7                                  | 10.2                                    | 72.6                                    | 24.2                                         | 33.3                                          | 5                                                        | 56                                     | 38                                     | 4                                      | 2                                      | 266                                                       |
|        |         | Malanil                    | 14  | 4.2                                                     | 30.9                                  | 10.4                                    | 73.1                                    | 24.6                                         | 33.6                                          | 4.7                                                      | 42                                     | 50                                     | 5                                      | 3                                      | 284                                                       |
|        |         | Malanil                    | 1   | 4.8                                                     | 37.7                                  | 12.8                                    | 78.4                                    | 26.7                                         | 34.1                                          | 4.9                                                      | 50                                     | 40                                     | 4                                      | 6                                      | 153                                                       |
|        |         | Malanil                    | 2   | 4.9                                                     | 38.3                                  | 12.8                                    | 77.7                                    | 26                                           | 33.5                                          | 5                                                        | 75                                     | 18                                     | 6                                      | 1                                      | 109                                                       |
|        |         | Malanil                    | 3   | 5                                                       | 38.1                                  | 12.6                                    | 77                                      | 25.4                                         | 32.9                                          | 5                                                        | 45                                     | 50                                     | 3                                      | 2                                      | 106                                                       |
|        |         | Malanil                    | 7   | 4.6                                                     | 35.4                                  | 11.8                                    | 77.1                                    | 25.6                                         | 33.2                                          | 6.5                                                      | 54                                     | 38                                     | 3                                      | 5                                      | 281                                                       |

## TSM02 Individual subject listings part 2

## CSR Appendix 16.2

| SUBJID | INITIAL | ARM                        | DAY | RBC<br>(10 <sup>6</sup> /μL)<br><i>99=Not<br/>available</i> | HCT<br>(%)<br><i>99=Not<br/>available</i> | HB<br>(g/dL)<br><i>99=Not<br/>available</i> | MCV<br>(fL)<br><i>999=Not<br/>available</i> | MCH<br>(pg/cell)<br><i>999=Not<br/>available</i> | MCHC<br>(pg/cell)<br><i>999=Not<br/>available</i> | WBC<br>(10 <sup>3</sup> / μL)<br><i>99=Not<br/>available</i> | NEU<br>(%)<br><i>999=Not<br/>available</i> | LYM<br>(%)<br><i>999=Not<br/>available</i> | MON<br>(%)<br><i>999=Not<br/>available</i> | EOS<br>(%)<br><i>999=Not<br/>available</i> | PLT<br>(10 <sup>3</sup> / μL)<br><i>999=Not<br/>available</i> |
|--------|---------|----------------------------|-----|-------------------------------------------------------------|-------------------------------------------|---------------------------------------------|---------------------------------------------|--------------------------------------------------|---------------------------------------------------|--------------------------------------------------------------|--------------------------------------------|--------------------------------------------|--------------------------------------------|--------------------------------------------|---------------------------------------------------------------|
|        |         | Malanil                    | 14  | 4.5                                                         | 35.7                                      | 11.6                                        | 79.1                                        | 25.6                                             | 32.4                                              | 6.2                                                          | 49                                         | 40                                         | 3                                          | 8                                          | 315                                                           |
|        |         | Malanil                    | 1   | 3.8                                                         | 34.5                                      | 12.1                                        | 90.3                                        | 31.8                                             | 35.2                                              | 6.6                                                          | 81                                         | 15                                         | 2                                          | 2                                          | 107                                                           |
|        |         | Malanil                    | 2   | 3.7                                                         | 32.3                                      | 11.6                                        | 88.6                                        | 31.8                                             | 35.9                                              | 4.4                                                          | 68                                         | 24                                         | 5                                          | 3                                          | 122                                                           |
|        |         | Malanil                    | 3   | 3.7                                                         | 33.5                                      | 12                                          | 89.6                                        | 32                                               | 35.7                                              | 4.7                                                          | 59                                         | 30                                         | 6                                          | 5                                          | 109                                                           |
|        |         | Malanil                    | 7   | 3.6                                                         | 31.7                                      | 11.4                                        | 88                                          | 31.6                                             | 35.9                                              | 6.7                                                          | 70                                         | 25                                         | 3                                          | 2                                          | 156                                                           |
|        |         | Malanil                    | 14  | 3.7                                                         | 32.5                                      | 11.5                                        | 87.1                                        | 30.8                                             | 35.3                                              | 8                                                            | 65                                         | 27                                         | 3                                          | 4                                          | 110                                                           |
|        |         | Sevuparin/DF02+<br>Malanil | 1   | 5.4                                                         | 43                                        | 14.2                                        | 80.5                                        | 26.5                                             | 33                                                | 4.1                                                          | 64                                         | 30                                         | 3                                          | 3                                          | 71                                                            |
|        |         | Sevuparin/DF02+<br>Malanil | 2   | 4.7                                                         | 37.2                                      | 12.6                                        | 79.7                                        | 27.1                                             | 33.9                                              | 3.3                                                          | 42                                         | 50                                         | 4                                          | 4                                          | 28                                                            |
|        |         | Sevuparin/DF02+<br>Malanil | 3   | 4.5                                                         | 36.2                                      | 12.3                                        | 80                                          | 27.2                                             | 34.1                                              | 3.4                                                          | 54                                         | 40                                         | 1                                          | 5                                          | 29                                                            |
|        |         | Sevuparin/DF02+<br>Malanil | 7   | 4.6                                                         | 35.8                                      | 12                                          | 78.6                                        | 26.3                                             | 33.4                                              | 4.9                                                          | 49                                         | 41                                         | 3                                          | 7                                          | 257                                                           |
|        |         | Sevuparin/DF02+<br>Malanil | 14  | 4.6                                                         | 37.3                                      | 12.6                                        | 80.9                                        | 27.3                                             | 33.7                                              | 5.2                                                          | 64                                         | 30                                         | 3                                          | 3                                          | 130                                                           |
|        |         | Malanil                    | 1   | 4.8                                                         | 43.5                                      | 14.5                                        | 83.5                                        | 29.2                                             | 35                                                | 6.8                                                          | 80                                         | 13                                         | 2                                          | 5                                          | 143                                                           |
|        |         | Malanil                    | 2   | 5                                                           | 41.3                                      | 14.3                                        | 82.6                                        | 28.6                                             | 34.6                                              | 6.2                                                          | 66                                         | 28                                         | 4                                          | 2                                          | 87                                                            |
|        |         | Malanil                    | 3   | 5.1                                                         | 41.8                                      | 14.4                                        | 81.5                                        | 28                                               | 34.4                                              | 6                                                            | 63                                         | 30                                         | 5                                          | 2                                          | 101                                                           |
|        |         | Malanil                    | 7   | 5                                                           | 41.6                                      | 14                                          | 83.2                                        | 28                                               | 33.6                                              | 7.7                                                          | 41                                         | 50                                         | 4                                          | 5                                          | 273                                                           |
|        |         | Malanil                    | 14  | 4.5                                                         | 39.1                                      | 12.9                                        | 86.2                                        | 28.5                                             | 33.1                                              | 9                                                            | 54                                         | 40                                         | 3                                          | 3                                          | 402                                                           |
|        |         | Malanil                    | 1   | 4.6                                                         | 41                                        | 13.8                                        | 88.6                                        | 30                                               | 33.8                                              | 6.1                                                          | 76                                         | 16                                         | 5                                          | 3                                          | 138                                                           |
|        |         | Malanil                    | 2   | 4.2                                                         | 36.7                                      | 13                                          | 87.2                                        | 30.8                                             | 35.3                                              | 3.4                                                          | 63                                         | 30                                         | 5                                          | 2                                          | 86                                                            |
|        |         | Malanil                    | 3   | 4.4                                                         | 37.8                                      | 13.2                                        | 86.8                                        | 30.3                                             | 35                                                | 3.4                                                          | 55                                         | 40                                         | 4                                          | 1                                          | 123                                                           |

## TSM02 Individual subject listings part 2

## CSR Appendix 16.2

| SUBJID | INITIAL | ARM                        | DAY | RBC<br>(10 <sup>6</sup> /μL)<br><i>99=Not available</i> | HCT<br>(%)<br><i>99=Not available</i> | HB<br>(g/dL)<br><i>99=Not available</i> | MCV<br>(fL)<br><i>999=Not available</i> | MCH<br>(pg/cell)<br><i>999=Not available</i> | MCHC<br>(pg/cell)<br><i>999=Not available</i> | WBC<br>(10 <sup>3</sup> / μL)<br><i>99=Not available</i> | NEU<br>(%)<br><i>999=Not available</i> | LYM<br>(%)<br><i>999=Not available</i> | MON<br>(%)<br><i>999=Not available</i> | EOS<br>(%)<br><i>999=Not available</i> | PLT<br>(10 <sup>3</sup> / μL)<br><i>999=Not available</i> |
|--------|---------|----------------------------|-----|---------------------------------------------------------|---------------------------------------|-----------------------------------------|-----------------------------------------|----------------------------------------------|-----------------------------------------------|----------------------------------------------------------|----------------------------------------|----------------------------------------|----------------------------------------|----------------------------------------|-----------------------------------------------------------|
|        |         | Malanil                    | 7   | 3.8                                                     | 33.2                                  | 12.1                                    | 86.4                                    | 31.4                                         | 36.4                                          | 6.6                                                      | 55                                     | 36                                     | 4                                      | 5                                      | 254                                                       |
|        |         | Malanil                    | 14  | 4.2                                                     | 37.1                                  | 13                                      | 88.9                                    | 31.2                                         | 35.1                                          | 6                                                        | 55                                     | 40                                     | 3                                      | 2                                      | 252                                                       |
|        |         | Malanil                    | 1   | 4.2                                                     | 36                                    | 13                                      | 86.2                                    | 31.2                                         | 36.2                                          | 6.7                                                      | 50                                     | 41                                     | 6                                      | 3                                      | 59                                                        |
|        |         | Malanil                    | 2   | 4                                                       | 34.8                                  | 12.5                                    | 86.1                                    | 30.9                                         | 35.8                                          | 3.1                                                      | 59                                     | 35                                     | 5                                      | 1                                      | 23                                                        |
|        |         | Malanil                    | 3   | 4.1                                                     | 35                                    | 12.5                                    | 85.4                                    | 30.5                                         | 35.7                                          | 3.7                                                      | 50                                     | 46                                     | 3                                      | 1                                      | 39                                                        |
|        |         | Malanil                    | 7   | 3.8                                                     | 33.2                                  | 7.7                                     | 87.2                                    | 20.2                                         | 23.1                                          | 4                                                        | 40                                     | 54                                     | 4                                      | 2                                      | 156                                                       |
|        |         | Malanil                    | 14  | 3.7                                                     | 32.7                                  | 11.5                                    | 88.8                                    | 31.1                                         | 35.1                                          | 5.6                                                      | 50                                     | 45                                     | 3                                      | 2                                      | 154                                                       |
|        |         | Malanil                    | 1   | 4.8                                                     | 40.8                                  | 14.3                                    | 85.6                                    | 30                                           | 35                                            | 9.3                                                      | 75                                     | 20                                     | 3                                      | 2                                      | 153                                                       |
|        |         | Malanil                    | 2   | 4.3                                                     | 36.5                                  | 13                                      | 84.6                                    | 30.1                                         | 35.5                                          | 5.1                                                      | 63                                     | 28                                     | 6                                      | 3                                      | 77                                                        |
|        |         | Malanil                    | 3   | 4.6                                                     | 38.6                                  | 13.5                                    | 84                                      | 29.4                                         | 35                                            | 5.4                                                      | 46                                     | 50                                     | 3                                      | 1                                      | 115                                                       |
|        |         | Malanil                    | 7   | 4.3                                                     | 36.2                                  | 13.1                                    | 84.8                                    | 30.6                                         | 36                                            | 8.5                                                      | 59                                     | 36                                     | 3                                      | 2                                      | 305                                                       |
|        |         | Malanil                    | 14  | 4.5                                                     | 38.9                                  | 13.3                                    | 86.1                                    | 29.4                                         | 34.1                                          | 8.3                                                      | 60                                     | 31                                     | 3                                      | 6                                      | 333                                                       |
|        |         | Sevuparin/DF02+<br>Malanil | 1   | 5.2                                                     | 40.8                                  | 14.1                                    | 78.3                                    | 27.2                                         | 34.7                                          | 5.9                                                      | 78                                     | 18                                     | 2                                      | 2                                      | 71                                                        |
|        |         | Sevuparin/DF02+<br>Malanil | 2   | 4.9                                                     | 38.1                                  | 13.2                                    | 78                                      | 27                                           | 34.6                                          | 3.8                                                      | 63                                     | 30                                     | 5                                      | 2                                      | 26                                                        |
|        |         | Sevuparin/DF02+<br>Malanil | 3   | 5                                                       | 39                                    | 13.5                                    | 77.8                                    | 27                                           | 34.7                                          | 4.1                                                      | 51                                     | 40                                     | 8                                      | 1                                      | 63                                                        |
|        |         | Sevuparin/DF02+<br>Malanil | 7   | 5.1                                                     | 39.2                                  | 13.3                                    | 77.6                                    | 26.3                                         | 33.9                                          | 5.2                                                      | 53                                     | 38                                     | 3                                      | 6                                      | 155                                                       |
|        |         | Sevuparin/DF02+<br>Malanil | 14  | 4.9                                                     | 38.8                                  | 13.1                                    | 79.7                                    | 27                                           | 33.9                                          | 5.4                                                      | 57                                     | 35                                     | 2                                      | 6                                      | 196                                                       |
|        |         | Malanil                    | 1   | 5.7                                                     | 46.5                                  | 16.4                                    | 81.9                                    | 28.9                                         | 35.3                                          | 3                                                        | 71                                     | 22                                     | 5                                      | 2                                      | 65                                                        |
|        |         | Malanil                    | 2   | 5.6                                                     | 45.6                                  | 16.2                                    | 81.4                                    | 29                                           | 35.6                                          | 4.6                                                      | 49                                     | 45                                     | 3                                      | 3                                      | 65                                                        |

## TSM02 Individual subject listings part 2

## CSR Appendix 16.2

| SUBJID | INITIAL | ARM                        | DAY | RBC<br>(10 <sup>6</sup> /μL)<br><i>99=Not available</i> | HCT<br>(%)<br><i>99=Not available</i> | HB<br>(g/dL)<br><i>99=Not available</i> | MCV<br>(fL)<br><i>999=Not available</i> | MCH<br>(pg/cell)<br><i>999=Not available</i> | MCHC<br>(pg/cell)<br><i>999=Not available</i> | WBC<br>(10 <sup>3</sup> / μL)<br><i>99=Not available</i> | NEU<br>(%)<br><i>999=Not available</i> | LYM<br>(%)<br><i>999=Not available</i> | MON<br>(%)<br><i>999=Not available</i> | EOS<br>(%)<br><i>999=Not available</i> | PLT<br>(10 <sup>3</sup> / μL)<br><i>999=Not available</i> |
|--------|---------|----------------------------|-----|---------------------------------------------------------|---------------------------------------|-----------------------------------------|-----------------------------------------|----------------------------------------------|-----------------------------------------------|----------------------------------------------------------|----------------------------------------|----------------------------------------|----------------------------------------|----------------------------------------|-----------------------------------------------------------|
|        |         | Malanil                    | 3   | 5                                                       | 40.4                                  | 14.1                                    | 81.3                                    | 28.3                                         | 34.9                                          | 3.3                                                      | 49                                     | 45                                     | 4                                      | 2                                      | 53                                                        |
|        |         | Malanil                    | 7   | 4.6                                                     | 38                                    | 13.1                                    | 83                                      | 28.6                                         | 34.5                                          | 4                                                        | 52                                     | 42                                     | 4                                      | 2                                      | 157                                                       |
|        |         | Malanil                    | 14  | 4.7                                                     | 38.4                                  | 13.2                                    | 82                                      | 28.2                                         | 34.4                                          | 7.4                                                      | 50                                     | 44                                     | 3                                      | 3                                      | 300                                                       |
|        |         | Malanil                    | 1   | 5.5                                                     | 31.6                                  | 9.7                                     | 57.6                                    | 17.8                                         | 30.8                                          | 6.5                                                      | 61                                     | 30                                     | 5                                      | 4                                      | 105                                                       |
|        |         | Malanil                    | 2   | 5.3                                                     | 29.9                                  | 9.2                                     | 56.9                                    | 17.4                                         | 30.6                                          | 4.2                                                      | 61                                     | 30                                     | 4                                      | 5                                      | 79                                                        |
|        |         | Malanil                    | 3   | 5                                                       | 28.6                                  | 9                                       | 56.8                                    | 17.9                                         | 31.5                                          | 4.2                                                      | 49                                     | 40                                     | 4                                      | 7                                      | 84                                                        |
|        |         | Malanil                    | 7   | 5.1                                                     | 29.9                                  | 9.2                                     | 58.7                                    | 18                                           | 30.6                                          | 7.6                                                      | 56                                     | 36                                     | 3                                      | 5                                      | 156                                                       |
|        |         | Malanil                    | 14  | 5.2                                                     | 31.3                                  | 9.7                                     | 60.3                                    | 18.7                                         | 31                                            | 6.4                                                      | 50                                     | 42                                     | 4                                      | 4                                      | 172                                                       |
|        |         | Malanil                    | 1   | 4                                                       | 33.6                                  | 11.7                                    | 85.4                                    | 29.8                                         | 34.9                                          | 4                                                        | 69                                     | 25                                     | 4                                      | 2                                      | 51                                                        |
|        |         | Malanil                    | 2   | 3.6                                                     | 30.6                                  | 10.8                                    | 84.1                                    | 29.7                                         | 35.3                                          | 3.1                                                      | 68                                     | 25                                     | 4                                      | 3                                      | 45                                                        |
|        |         | Malanil                    | 3   | 4.1                                                     | 34.7                                  | 11.9                                    | 85                                      | 29.2                                         | 34.4                                          | 4.4                                                      | 62                                     | 30                                     | 5                                      | 3                                      | 52                                                        |
|        |         | Malanil                    | 7   | 3.6                                                     | 30.4                                  | 10.6                                    | 85.2                                    | 29.8                                         | 35                                            | 6.4                                                      | 58                                     | 30                                     | 5                                      | 7                                      | 118                                                       |
|        |         | Malanil                    | 14  | 3.8                                                     | 33.7                                  | 11.6                                    | 87.8                                    | 30.3                                         | 34.5                                          | 5.1                                                      | 58                                     | 30                                     | 3                                      | 9                                      | 214                                                       |
|        |         | Sevuparin/DF02+<br>Malanil | 1   | 4                                                       | 36.1                                  | 13                                      | 89.7                                    | 32.2                                         | 36                                            | 6.1                                                      | 85                                     | 10                                     | 3                                      | 2                                      | 59                                                        |
|        |         | Sevuparin/DF02+<br>Malanil | 2   | 3.7                                                     | 32.6                                  | 12                                      | 88                                      | 32.5                                         | 36.9                                          | 5.8                                                      | 63                                     | 25                                     | 9                                      | 3                                      | 38                                                        |
|        |         | Sevuparin/DF02+<br>Malanil | 3   | 3.7                                                     | 32.6                                  | 11.9                                    | 88.8                                    | 32.5                                         | 36.6                                          | 4.3                                                      | 46                                     | 48                                     | 4                                      | 2                                      | 57                                                        |
|        |         | Sevuparin/DF02+<br>Malanil | 7   | 3.1                                                     | 28                                    | 10.1                                    | 91                                      | 32.7                                         | 36                                            | 3.7                                                      | 60                                     | 30                                     | 3                                      | 7                                      | 186                                                       |
|        |         | Sevuparin/DF02+<br>Malanil | 14  | 3.5                                                     | 31.5                                  | 10.9                                    | 91.3                                    | 31.5                                         | 34.5                                          | 4.2                                                      | 59                                     | 30                                     | 5                                      | 6                                      | 220                                                       |
|        |         | Sevuparin/DF02+            | 1   | 5.4                                                     | 42.6                                  | 14.5                                    | 79.7                                    | 27.2                                         | 34.1                                          | 5                                                        | 55                                     | 38                                     | 2                                      | 5                                      | 192                                                       |

## TSM02 Individual subject listings part 2

## CSR Appendix 16.2

| SUBJID | INITIAL | ARM                        | DAY | RBC<br>(10 <sup>6</sup> /μL)<br><i>99=Not available</i> | HCT<br>(%)<br><i>99=Not available</i> | HB<br>(g/dL)<br><i>99=Not available</i> | MCV<br>(fL)<br><i>999=Not available</i> | MCH<br>(pg/cell)<br><i>999=Not available</i> | MCHC<br>(pg/cell)<br><i>999=Not available</i> | WBC<br>(10 <sup>3</sup> / μL)<br><i>99=Not available</i> | NEU<br>(%)<br><i>999=Not available</i> | LYM<br>(%)<br><i>999=Not available</i> | MON<br>(%)<br><i>999=Not available</i> | EOS<br>(%)<br><i>999=Not available</i> | PLT<br>(10 <sup>3</sup> / μL)<br><i>999=Not available</i> |
|--------|---------|----------------------------|-----|---------------------------------------------------------|---------------------------------------|-----------------------------------------|-----------------------------------------|----------------------------------------------|-----------------------------------------------|----------------------------------------------------------|----------------------------------------|----------------------------------------|----------------------------------------|----------------------------------------|-----------------------------------------------------------|
|        |         | Malanil                    |     |                                                         |                                       |                                         |                                         |                                              |                                               |                                                          |                                        |                                        |                                        |                                        |                                                           |
|        |         | Sevuparin/DF02+<br>Malanil | 2   | 5.3                                                     | 43.6                                  | 14.2                                    | 83                                      | 27                                           | 32.6                                          | 4.9                                                      | 62                                     | 25                                     | 4                                      | 9                                      | 184                                                       |
|        |         | Sevuparin/DF02+<br>Malanil | 3   | 5.1                                                     | 41.8                                  | 14.2                                    | 82.2                                    | 28                                           | 34.1                                          | 5.2                                                      | 53                                     | 36                                     | 4                                      | 7                                      | 223                                                       |
|        |         | Sevuparin/DF02+<br>Malanil | 7   | 5.1                                                     | 42.3                                  | 14.6                                    | 82.5                                    | 28.5                                         | 34.6                                          | 4.8                                                      | 50                                     | 38                                     | 2                                      | 10                                     | 246                                                       |
|        |         | Sevuparin/DF02+<br>Malanil | 14  | 5.2                                                     | 42                                    | 15                                      | 80.4                                    | 28.8                                         | 35.8                                          | 6.6                                                      | 57                                     | 30                                     | 4                                      | 9                                      | 276                                                       |
|        |         | Sevuparin/DF02+<br>Malanil | 1   | 4.3                                                     | 32.3                                  | 11.1                                    | 75.5                                    | 26                                           | 34.4                                          | 6.8                                                      | 72                                     | 20                                     | 5                                      | 3                                      | 103                                                       |
|        |         | Sevuparin/DF02+<br>Malanil | 2   | 4.1                                                     | 30.5                                  | 10.7                                    | 74.8                                    | 26.2                                         | 35                                            | 6.1                                                      | 58                                     | 33                                     | 8                                      | 1                                      | 85                                                        |
|        |         | Sevuparin/DF02+<br>Malanil | 3   | 4.1                                                     | 30                                    | 10.6                                    | 73.9                                    | 25.9                                         | 35.1                                          | 5.9                                                      | 51                                     | 37                                     | 5                                      | 7                                      | 90                                                        |
|        |         | Sevuparin/DF02+<br>Malanil | 7   | 4.1                                                     | 30.8                                  | 10.4                                    | 74.7                                    | 25.1                                         | 33.6                                          | 9.2                                                      | 57                                     | 36                                     | 4                                      | 3                                      | 237                                                       |
|        |         | Sevuparin/DF02+<br>Malanil | 14  | 4.3                                                     | 33.1                                  | 11.1                                    | 77.7                                    | 26.1                                         | 33.6                                          | 8.8                                                      | 66                                     | 30                                     | 2                                      | 2                                      | 282                                                       |
|        |         | Sevuparin/DF02+<br>Malanil | 1   | 4.7                                                     | 39.2                                  | 13.7                                    | 83.4                                    | 29                                           | 34.8                                          | 6.4                                                      | 76                                     | 17                                     | 4                                      | 3                                      | 79                                                        |
|        |         | Sevuparin/DF02+<br>Malanil | 2   | 4.2                                                     | 35                                    | 12                                      | 82.6                                    | 28.3                                         | 34.3                                          | 3.8                                                      | 65                                     | 26                                     | 8                                      | 1                                      | 79                                                        |
|        |         | Sevuparin/DF02+<br>Malanil | 3   | 4.6                                                     | 37.7                                  | 13                                      | 82.4                                    | 28.5                                         | 34.6                                          | 3.9                                                      | 46                                     | 48                                     | 4                                      | 2                                      | 83                                                        |
|        |         | Sevuparin/DF02+<br>Malanil | 7   | 4.1                                                     | 33.8                                  | 12                                      | 81.7                                    | 28.9                                         | 35.4                                          | 4.3                                                      | 66                                     | 30                                     | 3                                      | 1                                      | 280                                                       |



TSM02 Individual subject listings part 2

CSR Appendix 16.2

| SUBJID | INITIAL | ARM                        | DAY | RBC<br>(10 <sup>6</sup> /μL)<br><i>99=Not available</i> | HCT<br>(%)<br><i>99=Not available</i> | HB<br>(g/dL)<br><i>99=Not available</i> | MCV<br>(fL)<br><i>999=Not available</i> | MCH<br>(pg/cell)<br><i>999=Not available</i> | MCHC<br>(pg/cell)<br><i>999=Not available</i> | WBC<br>(10 <sup>3</sup> / μL)<br><i>99=Not available</i> | NEU<br>(%)<br><i>999=Not available</i> | LYM<br>(%)<br><i>999=Not available</i> | MON<br>(%)<br><i>999=Not available</i> | EOS<br>(%)<br><i>999=Not available</i> | PLT<br>(10 <sup>3</sup> / μL)<br><i>999=Not available</i> |
|--------|---------|----------------------------|-----|---------------------------------------------------------|---------------------------------------|-----------------------------------------|-----------------------------------------|----------------------------------------------|-----------------------------------------------|----------------------------------------------------------|----------------------------------------|----------------------------------------|----------------------------------------|----------------------------------------|-----------------------------------------------------------|
|        |         | Malanil                    |     |                                                         |                                       |                                         |                                         |                                              |                                               |                                                          |                                        |                                        |                                        |                                        |                                                           |
|        |         | Sevuparin/DF02+<br>Malanil | 14  | 4.9                                                     | 40.6                                  | 13.3                                    | 83                                      | 27.2                                         | 32.8                                          | 6.4                                                      | 57                                     | 35                                     | 6                                      | 2                                      | 372                                                       |
|        |         | Sevuparin/DF02+<br>Malanil | 1   | 4.5                                                     | 38.8                                  | 13.1                                    | 85.4                                    | 28.8                                         | 33.8                                          | 3.8                                                      | 58                                     | 38                                     | 3                                      | 1                                      | 144                                                       |
|        |         | Sevuparin/DF02+<br>Malanil | 2   | 4                                                       | 32.7                                  | 11.7                                    | 82.1                                    | 29.2                                         | 35.6                                          | 2.3                                                      | 48                                     | 45                                     | 4                                      | 3                                      | 121                                                       |
|        |         | Sevuparin/DF02+<br>Malanil | 3   | 4                                                       | 33.5                                  | 11.4                                    | 83.2                                    | 28.4                                         | 34.1                                          | 2.9                                                      | 40                                     | 53                                     | 5                                      | 2                                      | 121                                                       |
|        |         | Sevuparin/DF02+<br>Malanil | 7   | 4.1                                                     | 34.1                                  | 11.7                                    | 83.8                                    | 28.7                                         | 34.2                                          | 3.2                                                      | 51                                     | 40                                     | 3                                      | 6                                      | 198                                                       |
|        |         | Sevuparin/DF02+<br>Malanil | 14  | 4.2                                                     | 35.2                                  | 11.6                                    | 84.7                                    | 27.9                                         | 32.9                                          | 6.3                                                      | 58                                     | 34                                     | 5                                      | 3                                      | 248                                                       |
|        |         | Malanil                    | 1   | 5.4                                                     | 42                                    | 14                                      | 78.6                                    | 26.1                                         | 33.2                                          | 6.4                                                      | 79                                     | 16                                     | 4                                      | 1                                      | 74                                                        |
|        |         | Malanil                    | 2   | 5.8                                                     | 44.5                                  | 14.9                                    | 77.1                                    | 25.9                                         | 33.5                                          | 4.4                                                      | 60                                     | 35                                     | 4                                      | 1                                      | 98                                                        |
|        |         | Malanil                    | 3   | 5.2                                                     | 39.9                                  | 13.4                                    | 76.5                                    | 25.8                                         | 33.7                                          | 5.3                                                      | 66                                     | 30                                     | 4                                      | 0                                      | 104                                                       |
|        |         | Malanil                    | 7   | 4.8                                                     | 36.6                                  | 11.9                                    | 76.9                                    | 25                                           | 32.5                                          | 5.6                                                      | 65                                     | 30                                     | 4                                      | 1                                      | 310                                                       |
|        |         | Malanil                    | 14  | 4.7                                                     | 36.6                                  | 11.9                                    | 77.5                                    | 25.3                                         | 32.6                                          | 6.9                                                      | 67                                     | 30                                     | 2                                      | 1                                      | 327                                                       |
|        |         | Malanil                    | 1   | 5.5                                                     | 46.2                                  | 16.1                                    | 84.2                                    | 29.4                                         | 34.9                                          | 5.2                                                      | 85                                     | 12                                     | 2                                      | 1                                      | 56                                                        |
|        |         | Malanil                    | 2   | 4.9                                                     | 40.7                                  | 14.5                                    | 82.4                                    | 29.4                                         | 35.7                                          | 7.4                                                      | 62                                     | 34                                     | 3                                      | 1                                      | 77                                                        |
|        |         | Malanil                    | 3   | 4.7                                                     | 38.5                                  | 14.2                                    | 82                                      | 30.2                                         | 36.8                                          | 6.9                                                      | 59                                     | 34                                     | 6                                      | 1                                      | 82                                                        |
|        |         | Malanil                    | 7   | 4.3                                                     | 35.8                                  | 12.1                                    | 83.7                                    | 28.4                                         | 33.9                                          | 7                                                        | 63                                     | 32                                     | 4                                      | 1                                      | 289                                                       |
|        |         | Malanil                    | 14  | 4.5                                                     | 37.7                                  | 12.7                                    | 84.1                                    | 28.3                                         | 33.7                                          | 8.5                                                      | 61                                     | 35                                     | 3                                      | 1                                      | 297                                                       |
|        |         | Malanil                    | 1   | 4.3                                                     | 38.3                                  | 13.6                                    | 88.5                                    | 31.4                                         | 35.5                                          | 5.9                                                      | 83                                     | 12                                     | 3                                      | 2                                      | 55                                                        |

TSM02 Individual subject listings part 2

CSR Appendix 16.2

| <b>SUBJID</b> | <b>INITIAL</b> | <b>ARM</b> | <b>DAY</b> | <b>RBC</b><br>(10 <sup>6</sup> /μL)<br><i>99=Not available</i> | <b>HCT</b><br>(%)<br><i>99=Not available</i> | <b>HB</b><br>(g/dL)<br><i>99=Not available</i> | <b>MCV</b><br>(fL)<br><i>999=Not available</i> | <b>MCH</b><br>(pg/cell)<br><i>999=Not available</i> | <b>MCHC</b><br>(pg/cell)<br><i>999=Not available</i> | <b>WBC</b><br>(10 <sup>3</sup> / μL)<br><i>99=Not available</i> | <b>NEU</b><br>(%)<br><i>999=Not available</i> | <b>LYM</b><br>(%)<br><i>999=Not available</i> | <b>MON</b><br>(%)<br><i>999=Not available</i> | <b>EOS</b><br>(%)<br><i>999=Not available</i> | <b>PLT</b><br>(10 <sup>3</sup> / μL)<br><i>999=Not available</i> |
|---------------|----------------|------------|------------|----------------------------------------------------------------|----------------------------------------------|------------------------------------------------|------------------------------------------------|-----------------------------------------------------|------------------------------------------------------|-----------------------------------------------------------------|-----------------------------------------------|-----------------------------------------------|-----------------------------------------------|-----------------------------------------------|------------------------------------------------------------------|
|               |                | Malanil    | 2          | 3.8                                                            | 33.4                                         | 11.7                                           | 87.4                                           | 30.5                                                | 34.9                                                 | 5.4                                                             | 59                                            | 30                                            | 6                                             | 5                                             | 42                                                               |
|               |                | Malanil    | 3          | 3.7                                                            | 32.3                                         | 11.4                                           | 86.7                                           | 30.6                                                | 35.4                                                 | 5                                                               | 67                                            | 25                                            | 5                                             | 3                                             | 56                                                               |
|               |                | Malanil    | 7          | 3.2                                                            | 29.3                                         | 9.9                                            | 91.4                                           | 30.9                                                | 33.8                                                 | 9.6                                                             | 59                                            | 30                                            | 5                                             | 6                                             | 194                                                              |
|               |                | Malanil    | 14         | 3.4                                                            | 31.2                                         | 10.8                                           | 92.1                                           | 31.9                                                | 34.6                                                 | 8                                                               | 63                                            | 29                                            | 2                                             | 6                                             | 213                                                              |

## TSM02 Individual subject listings part 2

## CSR Appendix 16.2

## 16.2.8.1 Biochemistry

| <b>SUBJID</b> | <b>INITIAL</b> | <b>ARM</b>                 | <b>DAY</b> | <b>GLUC</b><br>(mg/dL)<br>999=<br>Not available | <b>BUN</b><br>(mg/dL)<br>999=<br>Not available | <b>CREAT</b><br>(mg/dL)<br>99=<br>Not available | <b>BILI</b><br>(mg/dL)<br>99=<br>Not available | <b>AST</b><br>(U/L)<br>9999=<br>Not available | <b>ALT</b><br>(U/L)<br>9999=<br>Not available | <b>ALP</b><br>(U/L)<br>9999=<br>Not available | <b>SODIUM</b><br>(mmol/L)<br>999=<br>Not available | <b>K</b><br>(mmol/L)<br>99=<br>Not available | <b>CL</b><br>(mmol/L)<br>999=<br>Not available | <b>CO2</b><br>(mmol/L)<br>999=<br>Not available | <b>CA</b><br>(mmol/L)<br>99=<br>Not available | <b>CK</b><br>(U/L)<br>9999=<br>Not available | <b>LDH</b><br>(U/L)<br>9999=<br>Not available |
|---------------|----------------|----------------------------|------------|-------------------------------------------------|------------------------------------------------|-------------------------------------------------|------------------------------------------------|-----------------------------------------------|-----------------------------------------------|-----------------------------------------------|----------------------------------------------------|----------------------------------------------|------------------------------------------------|-------------------------------------------------|-----------------------------------------------|----------------------------------------------|-----------------------------------------------|
|               |                | Malanil                    | 1          | 103                                             | 12.2                                           | 0.8                                             | 1.4                                            | 42                                            | 46                                            | 91                                            | 130.4                                              | 3.5                                          | 101                                            | 25.4                                            | 11                                            | 87                                           | 226                                           |
|               |                | Malanil                    | 2          | 121                                             | 10.5                                           | 0.9                                             | 1.9                                            | 35                                            | 39                                            | 71                                            | 130.1                                              | 3.4                                          | 105.4                                          | 25.4                                            | 10                                            | 44                                           | 202                                           |
|               |                | Malanil                    | 3          | 125                                             | 11.9                                           | 0.6                                             | 1.5                                            | 33                                            | 39                                            | 73                                            | 130.5                                              | 4.5                                          | 100.9                                          | 26.2                                            | 10.9                                          | 40                                           | 216                                           |
|               |                | Sevuparin/DF02+<br>Malanil | 1          | 157                                             | 5                                              | 0.9                                             | 0.7                                            | 35                                            | 21                                            | 80                                            | 134.2                                              | 4                                            | 96.2                                           | 23.3                                            | 11.6                                          | 134                                          | 138                                           |
|               |                | Sevuparin/DF02+<br>Malanil | 2          | 99                                              | 5.8                                            | 1.1                                             | 0.6                                            | 30                                            | 13                                            | 70                                            | 136.8                                              | 3.6                                          | 100.7                                          | 23.2                                            | 11                                            | 70                                           | 147                                           |
|               |                | Sevuparin/DF02+<br>Malanil | 3          | 80                                              | 10.3                                           | 0.7                                             | 0.4                                            | 22                                            | 12                                            | 63                                            | 138.3                                              | 3.6                                          | 104.1                                          | 23.1                                            | 10.8                                          | 50                                           | 150                                           |
|               |                | Sevuparin/DF02+<br>Malanil | 7          | 90                                              | 12.7                                           | 1.1                                             | 0.4                                            | 28                                            | 12                                            | 75                                            | 143.4                                              | 4                                            | 105.9                                          | 22.1                                            | 10.7                                          | 222                                          | 135                                           |
|               |                | Sevuparin/DF02+<br>Malanil | 14         | 136                                             | 8.4                                            | 1.1                                             | 0.4                                            | 47                                            | 20                                            | 63                                            | 141.2                                              | 4.1                                          | 104                                            | 23.5                                            | 10.8                                          | 577                                          | 119                                           |
|               |                | Sevuparin/DF02+<br>Malanil | 1          | 195                                             | 21.8                                           | 1.3                                             | 1.4                                            | 31                                            | 21                                            | 80                                            | 130.3                                              | 3.3                                          | 92.6                                           | 22.6                                            | 10.6                                          | 132                                          | 109                                           |
|               |                | Sevuparin/DF02+<br>Malanil | 2          | 165                                             | 19                                             | 0.9                                             | 1                                              | 29                                            | 21                                            | 69                                            | 133.7                                              | 3.6                                          | 102.8                                          | 22.4                                            | 10.4                                          | 130                                          | 121                                           |
|               |                | Sevuparin/DF02+<br>Malanil | 3          | 121                                             | 15.9                                           | 1                                               | 0.9                                            | 33                                            | 24                                            | 76                                            | 134.8                                              | 3.8                                          | 101.4                                          | 22.3                                            | 10.6                                          | 228                                          | 146                                           |
|               |                | Sevuparin/DF02+<br>Malanil | 7          | 121                                             | 16.5                                           | 0.8                                             | 0.7                                            | 144                                           | 171                                           | 113                                           | 138.2                                              | 3.9                                          | 101.8                                          | 23.2                                            | 11.5                                          | 71                                           | 138                                           |
|               |                | Sevuparin/DF02+<br>Malanil | 14         | 105                                             | 13.7                                           | 1                                               | 0.8                                            | 40                                            | 68                                            | 79                                            | 140.2                                              | 3.6                                          | 101.6                                          | 21.4                                            | 9                                             | 86                                           | 92                                            |

TSM02 Individual subject listings part 2

CSR Appendix 16.2

| SUBJID | INITIAL | ARM                        | DAY | GLUC<br>(mg/dL)<br>999=<br>Not available | BUN<br>(mg/dL)<br>999=<br>Not available | CREAT<br>(mg/dL)<br>99=<br>Not available | BILI<br>(mg/dL)<br>99=<br>Not available | AST<br>(U/L)<br>9999=<br>Not available | ALT<br>(U/L)<br>9999=<br>Not available | ALP<br>(U/L)<br>9999=<br>Not available | SODIUM<br>(mmol/L)<br>999=<br>Not available | K<br>(mmol/L)<br>99=<br>Not available | CL<br>(mmol/L)<br>999=<br>Not available | CO2<br>(mmol/L)<br>999=<br>Not available | CA<br>(mmol/L)<br>99=<br>Not available | CK<br>(U/L)<br>9999=<br>Not available | LDH<br>(U/L)<br>9999=<br>Not available |
|--------|---------|----------------------------|-----|------------------------------------------|-----------------------------------------|------------------------------------------|-----------------------------------------|----------------------------------------|----------------------------------------|----------------------------------------|---------------------------------------------|---------------------------------------|-----------------------------------------|------------------------------------------|----------------------------------------|---------------------------------------|----------------------------------------|
|        |         | Malanil                    |     |                                          |                                         |                                          |                                         |                                        |                                        |                                        |                                             |                                       |                                         |                                          |                                        |                                       |                                        |
|        |         | Malanil                    | 1   | 75                                       | 14.6                                    | 1                                        | 1.9                                     | 22                                     | 20                                     | 73                                     | 137.1                                       | 3.8                                   | 98.7                                    | 24.8                                     | 10.6                                   | 46                                    | 180                                    |
|        |         | Malanil                    | 2   | 116                                      | 10.8                                    | 0.9                                      | 1.5                                     | 29                                     | 18                                     | 62                                     | 135.8                                       | 4                                     | 102.5                                   | 24.5                                     | 10.3                                   | 45                                    | 231                                    |
|        |         | Malanil                    | 3   | 142                                      | 9                                       | 0.7                                      | 1.2                                     | 37                                     | 23                                     | 55                                     | 135.3                                       | 4.1                                   | 101                                     | 24.8                                     | 7.7                                    | 48                                    | 222                                    |
|        |         | Malanil                    | 7   | 85                                       | 13.8                                    | 1                                        | 0.8                                     | 32                                     | 36                                     | 87                                     | 137.9                                       | 3.9                                   | 98.5                                    | 22                                       | 8.7                                    | 53                                    | 149                                    |
|        |         | Malanil                    | 14  | 93                                       | 11.4                                    | 0.9                                      | 0.8                                     | 20                                     | 25                                     | 59                                     | 137.1                                       | 4                                     | 104.6                                   | 22.8                                     | 8.1                                    | 110                                   | 97                                     |
|        |         | Malanil                    | 1   | 102                                      | 9.6                                     | 0.9                                      | 2.8                                     | 31                                     | 58                                     | 80                                     | 137.9                                       | 4.6                                   | 101                                     | 24.7                                     | 11.8                                   | 67                                    | 283                                    |
|        |         | Malanil                    | 2   | 115                                      | 13.8                                    | 1                                        | 1.8                                     | 35                                     | 50                                     | 67                                     | 137                                         | 3.8                                   | 104.1                                   | 23.2                                     | 8.4                                    | 158                                   | 284                                    |
|        |         | Malanil                    | 3   | 140                                      | 16                                      | 0.7                                      | 1.3                                     | 25                                     | 48                                     | 63                                     | 135.9                                       | 3.8                                   | 103.5                                   | 23.6                                     | 8.3                                    | 97                                    | 245                                    |
|        |         | Malanil                    | 7   | 94                                       | 11.8                                    | 0.8                                      | 0.8                                     | 46                                     | 48                                     | 85                                     | 137.8                                       | 3.8                                   | 101                                     | 22.7                                     | 9.2                                    | 72                                    | 196                                    |
|        |         | Malanil                    | 14  | 93                                       | 8.1                                     | 0.8                                      | 1.1                                     | 18                                     | 23                                     | 58                                     | 137.3                                       | 4                                     | 104.9                                   | 21.8                                     | 9.8                                    | 99                                    | 139                                    |
|        |         | Sevuparin/DF02+<br>Malanil | 1   | 134                                      | 21.9                                    | 1                                        | 1.1                                     | 36                                     | 21                                     | 121                                    | 133.8                                       | 3.5                                   | 102.6                                   | 22.1                                     | 8.2                                    | 148                                   | 90                                     |
|        |         | Sevuparin/DF02+<br>Malanil | 2   | 112                                      | 20.1                                    | 0.7                                      | 0.9                                     | 39                                     | 21                                     | 125                                    | 132.2                                       | 3.9                                   | 105                                     | 23.5                                     | 7.7                                    | 74                                    | 73                                     |
|        |         | Sevuparin/DF02+<br>Malanil | 3   | 96                                       | 13                                      | 0.8                                      | 0.9                                     | 35                                     | 20                                     | 146                                    | 133.6                                       | 3.5                                   | 105.2                                   | 23.7                                     | 7.6                                    | 275                                   | 74                                     |
|        |         | Sevuparin/DF02+<br>Malanil | 7   | 171                                      | 12.7                                    | 0.9                                      | 0.4                                     | 176                                    | 159                                    | 222                                    | 136.6                                       | 4.4                                   | 105.5                                   | 22.5                                     | 8.6                                    | 140                                   | 208                                    |
|        |         | Sevuparin/DF02+<br>Malanil | 14  | 103                                      | 10.5                                    | 0.7                                      | 0.8                                     | 43                                     | 39                                     | 151                                    | 135.8                                       | 4.3                                   | 105.1                                   | 22.8                                     | 8.5                                    | 124                                   | 133                                    |
|        |         | Malanil                    | 1   | 97                                       | 16.3                                    | 1.1                                      | 1.8                                     | 35                                     | 27                                     | 62                                     | 132                                         | 4.2                                   | 101.7                                   | 24.5                                     | 9                                      | 47                                    | 217                                    |
|        |         | Malanil                    | 2   | 94                                       | 12.7                                    | 0.8                                      | 1                                       | 31                                     | 25                                     | 69                                     | 133.6                                       | 3.9                                   | 97.3                                    | 27.2                                     | 7.9                                    | 46                                    | 186                                    |

## TSM02 Individual subject listings part 2

## CSR Appendix 16.2

| SUBJID | INITIAL | ARM                        | DAY | GLUC<br>(mg/dL)<br>999=<br>Not available | BUN<br>(mg/dL)<br>999=<br>Not available | CREAT<br>(mg/dL)<br>99=<br>Not available | BILI<br>(mg/dL)<br>99=<br>Not available | AST<br>(U/L)<br>9999=<br>Not available | ALT<br>(U/L)<br>9999=<br>Not available | ALP<br>(U/L)<br>9999=<br>Not available | SODIUM<br>(mmol/L)<br>999=<br>Not available | K<br>(mmol/L)<br>99=<br>Not available | CL<br>(mmol/L)<br>999=<br>Not available | CO2<br>(mmol/L)<br>999=<br>Not available | CA<br>(mmol/L)<br>99=<br>Not available | CK<br>(U/L)<br>9999=<br>Not available | LDH<br>(U/L)<br>9999=<br>Not available |
|--------|---------|----------------------------|-----|------------------------------------------|-----------------------------------------|------------------------------------------|-----------------------------------------|----------------------------------------|----------------------------------------|----------------------------------------|---------------------------------------------|---------------------------------------|-----------------------------------------|------------------------------------------|----------------------------------------|---------------------------------------|----------------------------------------|
|        |         | Malanil                    | 3   | 85                                       | 10.7                                    | 0.9                                      | 1.1                                     | 32                                     | 30                                     | 68                                     | 138.5                                       | 4.2                                   | 103.2                                   | 24.5                                     | 7.7                                    | 46                                    | 184                                    |
|        |         | Malanil                    | 7   | 124                                      | 5.8                                     | 0.9                                      | 0.7                                     | 30                                     | 36                                     | 85                                     | 136                                         | 4.5                                   | 100.5                                   | 25.2                                     | 8.5                                    | 55                                    | 130                                    |
|        |         | Sevuparin/DF02+<br>Malanil | 1   | 76                                       | 25.7                                    | 2                                        | 0.6                                     | 22                                     | 21                                     | 68                                     | 138.1                                       | 3.3                                   | 107.1                                   | 23.6                                     | 8.7                                    | 68                                    | 117                                    |
|        |         | Sevuparin/DF02+<br>Malanil | 2   | 123                                      | 18.9                                    | 2                                        | 0.6                                     | 16                                     | 15                                     | 61                                     | 138.8                                       | 3.5                                   | 107.8                                   | 21.1                                     | 7.5                                    | 2                                     | 122                                    |
|        |         | Sevuparin/DF02+<br>Malanil | 3   | 123                                      | 22.7                                    | 1.9                                      | 0.7                                     | 13                                     | 12                                     | 76                                     | 138.7                                       | 3.7                                   | 103.8                                   | 21.1                                     | 7.8                                    | 38                                    | 147                                    |
|        |         | Sevuparin/DF02+<br>Malanil | 7   | 86                                       | 25.6                                    | 2.3                                      | 0.8                                     | 26                                     | 38                                     | 97                                     | 135.8                                       | 4                                     | 101.6                                   | 22.9                                     | 9.2                                    | 52                                    | 100                                    |
|        |         | Sevuparin/DF02+<br>Malanil | 14  | 112                                      | 15.4                                    | 1.9                                      | 0.8                                     | 34                                     | 34                                     | 105                                    | 136.1                                       | 4.1                                   | 102                                     | 26.8                                     | 9                                      | 39                                    | 76                                     |
|        |         | Sevuparin/DF02+<br>Malanil | 1   | 95                                       | 16.7                                    | 1                                        | 1.2                                     | 31                                     | 24                                     | 147                                    | 134.7                                       | 3.5                                   | 99.4                                    | 21.7                                     | 8.2                                    | 34                                    | 310                                    |
|        |         | Sevuparin/DF02+<br>Malanil | 2   | 133                                      | 8.1                                     | 0.7                                      | 1                                       | 22                                     | 17                                     | 96                                     | 133.3                                       | 3.6                                   | 105                                     | 21.7                                     | 7                                      | 23                                    | 300                                    |
|        |         | Sevuparin/DF02+<br>Malanil | 3   | 94                                       | 10.8                                    | 0.6                                      | 1.1                                     | 20                                     | 16                                     | 94                                     | 134.1                                       | 3.2                                   | 102.7                                   | 23.4                                     | 7.7                                    | 15                                    | 343                                    |
|        |         | Sevuparin/DF02+<br>Malanil | 7   | 93                                       | 4.6                                     | 0.8                                      | 0.6                                     | 59                                     | 53                                     | 94                                     | 141.2                                       | 3.7                                   | 108.6                                   | 24.6                                     | 8                                      | 143                                   | 314                                    |
|        |         | Sevuparin/DF02+<br>Malanil | 14  | 82                                       | 7.4                                     | 0.8                                      | 0.7                                     | 20                                     | 17                                     | 125                                    | 140.8                                       | 4.1                                   | 101.6                                   | 29.1                                     | 8.6                                    | 90                                    | 193                                    |
|        |         | Malanil                    | 1   | 109                                      | 11.3                                    | 0.9                                      | 1.2                                     | 18                                     | 10                                     | 122                                    | 136.3                                       | 3.9                                   | 100.8                                   | 26.1                                     | 8.2                                    | 47                                    | 132                                    |
|        |         | Malanil                    | 2   | 114                                      | 11.6                                    | 0.9                                      | 1.3                                     | 21                                     | 11                                     | 104                                    | 134.9                                       | 4                                     | 103                                     | 26.9                                     | 7.8                                    | 44                                    | 168                                    |
|        |         | Malanil                    | 3   | 125                                      | 13.2                                    | 1                                        | 1                                       | 15                                     | 8                                      | 102                                    | 136.7                                       | 4                                     | 101.9                                   | 23.9                                     | 8.1                                    | 25                                    | 136                                    |

## TSM02 Individual subject listings part 2

## CSR Appendix 16.2

| <b>SUBJID</b> | <b>INITIAL</b> | <b>ARM</b>                 | <b>DAY</b> | <b>GLUC</b><br>(mg/dL)<br>999=<br><i>Not available</i> | <b>BUN</b><br>(mg/dL)<br>999=<br><i>Not available</i> | <b>CREAT</b><br>(mg/dL)<br>99=<br><i>Not available</i> | <b>BILI</b><br>(mg/dL)<br>99=<br><i>Not available</i> | <b>AST</b><br>(U/L)<br>9999=<br><i>Not available</i> | <b>ALT</b><br>(U/L)<br>9999=<br><i>Not available</i> | <b>ALP</b><br>(U/L)<br>9999=<br><i>Not available</i> | <b>SODIUM</b><br>(mmol/L)<br>999=<br><i>Not available</i> | <b>K</b><br>(mmol/L)<br>99=<br><i>Not available</i> | <b>CL</b><br>(mmol/L)<br>999=<br><i>Not available</i> | <b>CO2</b><br>(mmol/L)<br>999=<br><i>Not available</i> | <b>CA</b><br>(mmol/L)<br>99=<br><i>Not available</i> | <b>CK</b><br>(U/L)<br>9999=<br><i>Not available</i> | <b>LDH</b><br>(U/L)<br>9999=<br><i>Not available</i> |
|---------------|----------------|----------------------------|------------|--------------------------------------------------------|-------------------------------------------------------|--------------------------------------------------------|-------------------------------------------------------|------------------------------------------------------|------------------------------------------------------|------------------------------------------------------|-----------------------------------------------------------|-----------------------------------------------------|-------------------------------------------------------|--------------------------------------------------------|------------------------------------------------------|-----------------------------------------------------|------------------------------------------------------|
|               |                | Malanil                    | 7          | 93                                                     | 7.8                                                   | 0.9                                                    | 0.5                                                   | 20                                                   | 13                                                   | 121                                                  | 139.7                                                     | 5.1                                                 | 103.9                                                 | 30.7                                                   | 9                                                    | 45                                                  | 109                                                  |
|               |                | Malanil                    | 14         | 80                                                     | 9.6                                                   | 1                                                      | 1                                                     | 21                                                   | 17                                                   | 120                                                  | 138.3                                                     | 4.1                                                 | 98.8                                                  | 24.8                                                   | 8.8                                                  | 94                                                  | 123                                                  |
|               |                | Malanil                    | 1          | 109                                                    | 11.1                                                  | 0.9                                                    | 1.3                                                   | 28                                                   | 21                                                   | 206                                                  | 137.7                                                     | 4                                                   | 100.9                                                 | 27.4                                                   | 8.4                                                  | 129                                                 | 219                                                  |
|               |                | Malanil                    | 2          | 102                                                    | 17.9                                                  | 0.7                                                    | 1                                                     | 21                                                   | 17                                                   | 188                                                  | 136.7                                                     | 4                                                   | 99.6                                                  | 26.5                                                   | 8.3                                                  | 77                                                  | 212                                                  |
|               |                | Malanil                    | 3          | 96                                                     | 16.3                                                  | 0.9                                                    | 1.1                                                   | 22                                                   | 17                                                   | 190                                                  | 136.9                                                     | 4.4                                                 | 98.8                                                  | 27                                                     | 8.2                                                  | 65                                                  | 220                                                  |
|               |                | Malanil                    | 7          | 96                                                     | 12.5                                                  | 1                                                      | 1.1                                                   | 23                                                   | 17                                                   | 159                                                  | 136.4                                                     | 4.6                                                 | 97.4                                                  | 25.3                                                   | 9                                                    | 115                                                 | 180                                                  |
|               |                | Malanil                    | 14         | 87                                                     | 11.5                                                  | 0.9                                                    | 0.8                                                   | 29                                                   | 21                                                   | 184                                                  | 141.6                                                     | 4                                                   | 106.1                                                 | 24.4                                                   | 8.5                                                  | 310                                                 | 309                                                  |
|               |                | Sevuparin/DF02+<br>Malanil | 1          | 147                                                    | 12.5                                                  | 0.9                                                    | 0.7                                                   | 29                                                   | 19                                                   | 140                                                  | 138.9                                                     | 3.9                                                 | 100.7                                                 | 26.5                                                   | 8.6                                                  | 37                                                  | 197                                                  |
|               |                | Sevuparin/DF02+<br>Malanil | 2          | 107                                                    | 8.3                                                   | 0.9                                                    | 0.9                                                   | 28                                                   | 13                                                   | 100                                                  | 132.7                                                     | 4.3                                                 | 101.4                                                 | 23.3                                                   | 8                                                    | 34                                                  | 296                                                  |
|               |                | Sevuparin/DF02+<br>Malanil | 3          | 129                                                    | 11.2                                                  | 1.1                                                    | 0.9                                                   | 33                                                   | 16                                                   | 106                                                  | 137.8                                                     | 4.1                                                 | 104.9                                                 | 25                                                     | 8.4                                                  | 32                                                  | 309                                                  |
|               |                | Sevuparin/DF02+<br>Malanil | 7          | 94                                                     | 8.6                                                   | 0.7                                                    | 0.7                                                   | 41                                                   | 33                                                   | 106                                                  | 145.5                                                     | 3.9                                                 | 109.4                                                 | 27                                                     | 8.3                                                  | 48                                                  | 254                                                  |
|               |                | Sevuparin/DF02+<br>Malanil | 1          | 115                                                    | 11.8                                                  | 0.8                                                    | 2.5                                                   | 65                                                   | 41                                                   | 73                                                   | 135.4                                                     | 3.9                                                 | 90.8                                                  | 26.1                                                   | 8.4                                                  | 62                                                  | 162                                                  |
|               |                | Sevuparin/DF02+<br>Malanil | 2          | 153                                                    | 4.9                                                   | 0.4                                                    | 2.5                                                   | 83                                                   | 47                                                   | 60                                                   | 129.9                                                     | 3.7                                                 | 90.2                                                  | 26.5                                                   | 7.2                                                  | 34                                                  | 202                                                  |
|               |                | Sevuparin/DF02+<br>Malanil | 3          | 114                                                    | 12                                                    | 0.7                                                    | 1.4                                                   | 52                                                   | 44                                                   | 61                                                   | 134                                                       | 3.7                                                 | 90.4                                                  | 26                                                     | 7                                                    | 26                                                  | 165                                                  |

TSM02 Individual subject listings part 2

CSR Appendix 16.2

| SUBJID | INITIAL | ARM                        | DAY | GLUC<br>(mg/dL)<br>999=<br>Not available | BUN<br>(mg/dL)<br>999=<br>Not available | CREAT<br>(mg/dL)<br>99=<br>Not available | BILI<br>(mg/dL)<br>99=<br>Not available | AST<br>(U/L)<br>9999=<br>Not available | ALT<br>(U/L)<br>9999=<br>Not available | ALP<br>(U/L)<br>9999=<br>Not available | SODIUM<br>(mmol/L)<br>999=<br>Not available | K<br>(mmol/L)<br>99=<br>Not available | CL<br>(mmol/L)<br>999=<br>Not available | CO2<br>(mmol/L)<br>999=<br>Not available | CA<br>(mmol/L)<br>99=<br>Not available | CK<br>(U/L)<br>9999=<br>Not available | LDH<br>(U/L)<br>9999=<br>Not available |
|--------|---------|----------------------------|-----|------------------------------------------|-----------------------------------------|------------------------------------------|-----------------------------------------|----------------------------------------|----------------------------------------|----------------------------------------|---------------------------------------------|---------------------------------------|-----------------------------------------|------------------------------------------|----------------------------------------|---------------------------------------|----------------------------------------|
|        |         | Sevuparin/DF02+<br>Malanil | 7   | 95                                       | 9.5                                     | 0.9                                      | 1.2                                     | 36                                     | 49                                     | 101                                    | 136.2                                       | 3.9                                   | 99.5                                    | 26.1                                     | 8.5                                    | 34                                    | 145                                    |
|        |         | Sevuparin/DF02+<br>Malanil | 14  | 83                                       | 11.1                                    | 0.9                                      | 0.8                                     | 36                                     | 35                                     | 92                                     | 140.5                                       | 4.3                                   | 101.5                                   | 25                                       | 8.3                                    | 111                                   | 158                                    |
|        |         | Malanil                    | 1   | 149                                      | 12.5                                    | 1.1                                      | 1.2                                     | 25                                     | 17                                     | 84                                     | 140.5                                       | 4.3                                   | 101.8                                   | 27.7                                     | 8.6                                    | 83                                    | 116                                    |
|        |         | Malanil                    | 2   | 119                                      | 10.2                                    | 1.2                                      | 2.4                                     | 43                                     | 23                                     | 77                                     | 135.5                                       | 3.6                                   | 99.9                                    | 24.5                                     | 7.8                                    | 43                                    | 172                                    |
|        |         | Malanil                    | 3   | 152                                      | 13.5                                    | 1                                        | 1.4                                     | 28                                     | 22                                     | 76                                     | 133.3                                       | 3.6                                   | 98.2                                    | 23.8                                     | 7.7                                    | 26                                    | 183                                    |
|        |         | Malanil                    | 7   | 95                                       | 11.9                                    | 1                                        | 0.5                                     | 54                                     | 55                                     | 89                                     | 139.5                                       | 4.9                                   | 97.7                                    | 27.2                                     | 8.8                                    | 52                                    | 180                                    |
|        |         | Malanil                    | 14  | 77                                       | 16.2                                    | 1                                        | 0.7                                     | 21                                     | 24                                     | 93                                     | 140.4                                       | 4.4                                   | 98.5                                    | 27.6                                     | 8.9                                    | 64                                    | 123                                    |
|        |         | Malanil                    | 1   | 170                                      | 24.5                                    | 1.3                                      | 2.4                                     | 33                                     | 27                                     | 114                                    | 136.6                                       | 3.5                                   | 98.1                                    | 24.4                                     | 7.4                                    | 33                                    | 150                                    |
|        |         | Malanil                    | 2   | 138                                      | 19.9                                    | 0.7                                      | 1.9                                     | 30                                     | 25                                     | 85                                     | 133.5                                       | 3.3                                   | 96.9                                    | 25.2                                     | 7.1                                    | 21                                    | 185                                    |
|        |         | Malanil                    | 3   | 103                                      | 15.8                                    | 0.9                                      | 2.5                                     | 33                                     | 25                                     | 92                                     | 137.1                                       | 3.6                                   | 97.8                                    | 26.5                                     | 7                                      | 16                                    | 171                                    |
|        |         | Malanil                    | 7   | 90                                       | 12.4                                    | 0.8                                      | 0.6                                     | 60                                     | 69                                     | 111                                    | 138.7                                       | 3.7                                   | 100                                     | 28.4                                     | 7.1                                    | 28                                    | 155                                    |
|        |         | Malanil                    | 14  | 84                                       | 11.9                                    | 1                                        | 1.5                                     | 63                                     | 105                                    | 131                                    | 138.4                                       | 4                                     | 95.2                                    | 27.8                                     | 8.3                                    | 43                                    | 217                                    |
|        |         | Malanil                    | 1   | 173                                      | 12                                      | 0.9                                      | 1.2                                     | 32                                     | 12                                     | 269                                    | 136.5                                       | 3.8                                   | 97.2                                    | 26.8                                     | 8.2                                    | 100                                   | 91                                     |
|        |         | Malanil                    | 2   | 108                                      | 11.2                                    | 0.9                                      | 0.6                                     | 33                                     | 13                                     | 282                                    | 139.2                                       | 4                                     | 100.4                                   | 27.1                                     | 8.6                                    | 66                                    | 93                                     |
|        |         | Malanil                    | 3   | 131                                      | 13.4                                    | 0.8                                      | 1                                       | 33                                     | 16                                     | 313                                    | 138.7                                       | 3.8                                   | 95.4                                    | 27.3                                     | 9                                      | 70                                    | 152                                    |
|        |         | Malanil                    | 7   | 83                                       | 15.1                                    | 1                                        | 0.3                                     | 32                                     | 10                                     | 255                                    | 145                                         | 3.7                                   | 104.6                                   | 25.9                                     | 8.4                                    | 99                                    | 143                                    |
|        |         | Malanil                    | 14  | 112                                      | 11.5                                    | 0.9                                      | 0.8                                     | 29                                     | 11                                     | 226                                    | 141.7                                       | 5.3                                   | 103.2                                   | 25.9                                     | 9.6                                    | 117                                   | 127                                    |
|        |         | Sevuparin/DF02+<br>Malanil | 1   | 191                                      | 6.4                                     | 0.8                                      | 1.1                                     | 37                                     | 22                                     | 54                                     | 135                                         | 4.2                                   | 104.8                                   | 25.8                                     | 9                                      | 58                                    | 227                                    |
|        |         | Sevuparin/DF02+<br>Malanil | 2   | 103                                      | 7.6                                     | 0.7                                      | 0.7                                     | 20                                     | 16                                     | 65                                     | 137                                         | 3.2                                   | 106.6                                   | 24.8                                     | 7.6                                    | 31                                    | 212                                    |

## TSM02 Individual subject listings part 2

## CSR Appendix 16.2

| SUBJID | INITIAL | ARM                        | DAY | GLUC<br>(mg/dL)<br>999=<br>Not available | BUN<br>(mg/dL)<br>999=<br>Not available | CREAT<br>(mg/dL)<br>99=<br>Not available | BILI<br>(mg/dL)<br>99=<br>Not available | AST<br>(U/L)<br>9999=<br>Not available | ALT<br>(U/L)<br>9999=<br>Not available | ALP<br>(U/L)<br>9999=<br>Not available | SODIUM<br>(mmol/L)<br>999=<br>Not available | K<br>(mmol/L)<br>99=<br>Not available | CL<br>(mmol/L)<br>999=<br>Not available | CO2<br>(mmol/L)<br>999=<br>Not available | CA<br>(mmol/L)<br>99=<br>Not available | CK<br>(U/L)<br>9999=<br>Not available | LDH<br>(U/L)<br>9999=<br>Not available |
|--------|---------|----------------------------|-----|------------------------------------------|-----------------------------------------|------------------------------------------|-----------------------------------------|----------------------------------------|----------------------------------------|----------------------------------------|---------------------------------------------|---------------------------------------|-----------------------------------------|------------------------------------------|----------------------------------------|---------------------------------------|----------------------------------------|
|        |         | Sevuparin/DF02+<br>Malanil | 3   | 105                                      | 7.7                                     | 0.8                                      | 0.8                                     | 21                                     | 16                                     | 68                                     | 136.8                                       | 3.7                                   | 106.9                                   | 23.3                                     | 8.1                                    | 27                                    | 229                                    |
|        |         | Sevuparin/DF02+<br>Malanil | 7   | 104                                      | 8.3                                     | 0.9                                      | 0.6                                     | 49                                     | 59                                     | 60                                     | 138.5                                       | 4.5                                   | 102.6                                   | 27.5                                     | 9.3                                    | 75                                    | 200                                    |
|        |         | Sevuparin/DF02+<br>Malanil | 14  | 72                                       | 11.7                                    | 1.2                                      | 1.4                                     | 42                                     | 32                                     | 65                                     | 135.3                                       | 4.5                                   | 99.2                                    | 21.5                                     | 8.7                                    | 335                                   | 265                                    |
|        |         | Sevuparin/DF02+<br>Malanil | 1   | 154                                      | 19.4                                    | 1.3                                      | 1.8                                     | 31                                     | 42                                     | 105                                    | 136.3                                       | 4.1                                   | 98.2                                    | 26.4                                     | 8.3                                    | 43                                    | 157                                    |
|        |         | Sevuparin/DF02+<br>Malanil | 2   | 158                                      | 21.2                                    | 1.1                                      | 1.1                                     | 22                                     | 28                                     | 85                                     | 134.6                                       | 3.9                                   | 93.5                                    | 28.3                                     | 7.8                                    | 34                                    | 148                                    |
|        |         | Sevuparin/DF02+<br>Malanil | 3   | 142                                      | 14.6                                    | 1.2                                      | 0.9                                     | 20                                     | 23                                     | 79                                     | 134.7                                       | 3.8                                   | 98.8                                    | 25                                       | 7.7                                    | 24                                    | 159                                    |
|        |         | Sevuparin/DF02+<br>Malanil | 7   | 115                                      | 8.6                                     | 1.1                                      | 0.9                                     | 173                                    | 200                                    | 99                                     | 137.4                                       | 4.3                                   | 99.5                                    | 26.1                                     | 7.9                                    | 39                                    | 198                                    |
|        |         | Sevuparin/DF02+<br>Malanil | 14  | 194                                      | 7.5                                     | 1.1                                      | 0.6                                     | 41                                     | 100                                    | 75                                     | 139.8                                       | 4                                     | 104.8                                   | 26.7                                     | 7.8                                    | 49                                    | 152                                    |
|        |         | Sevuparin/DF02+<br>Malanil | 1   | 143                                      | 12.4                                    | 0.9                                      | 1.4                                     | 19                                     | 12                                     | 45                                     | 130.5                                       | 3.8                                   | 98.1                                    | 24                                       | 8.4                                    | 82                                    | 134                                    |
|        |         | Sevuparin/DF02+<br>Malanil | 2   | 82                                       | 4.8                                     | 0.7                                      | 0.7                                     | 19                                     | 12                                     | 52                                     | 131.7                                       | 4.1                                   | 102.7                                   | 25                                       | 7.2                                    | 30                                    | 136                                    |
|        |         | Sevuparin/DF02+<br>Malanil | 3   | 105                                      | 7.8                                     | 0.7                                      | 0.7                                     | 13                                     | 9                                      | 54                                     | 129.9                                       | 3.1                                   | 101.8                                   | 24.5                                     | 7.5                                    | 18                                    | 137                                    |
|        |         | Sevuparin/DF02+<br>Malanil | 7   | 80                                       | 7.1                                     | 0.6                                      | 0.5                                     | 86                                     | 105                                    | 45                                     | 136                                         | 3.9                                   | 104.9                                   | 26                                       | 7.5                                    | 43                                    | 122                                    |
|        |         | Sevuparin/DF02+<br>Malanil | 14  | 81                                       | 7.4                                     | 0.7                                      | 0.9                                     | 22                                     | 35                                     | 46                                     | 138.5                                       | 4.5                                   | 102.9                                   | 24.4                                     | 8.1                                    | 62                                    | 203                                    |



## TSM02 Individual subject listings part 2

## CSR Appendix 16.2

| <b>SUBJID</b> | <b>INITIAL</b> | <b>ARM</b>                 | <b>DAY</b> | <b>GLUC</b><br>(mg/dL)<br>999=<br><i>Not available</i> | <b>BUN</b><br>(mg/dL)<br>999=<br><i>Not available</i> | <b>CREAT</b><br>(mg/dL)<br>99=<br><i>Not available</i> | <b>BILI</b><br>(mg/dL)<br>99=<br><i>Not available</i> | <b>AST</b><br>(U/L)<br>9999=<br><i>Not available</i> | <b>ALT</b><br>(U/L)<br>9999=<br><i>Not available</i> | <b>ALP</b><br>(U/L)<br>9999=<br><i>Not available</i> | <b>SODIUM</b><br>(mmol/L)<br>999=<br><i>Not available</i> | <b>K</b><br>(mmol/L)<br>99=<br><i>Not available</i> | <b>CL</b><br>(mmol/L)<br>999=<br><i>Not available</i> | <b>CO2</b><br>(mmol/L)<br>999=<br><i>Not available</i> | <b>CA</b><br>(mmol/L)<br>99=<br><i>Not available</i> | <b>CK</b><br>(U/L)<br>9999=<br><i>Not available</i> | <b>LDH</b><br>(U/L)<br>9999=<br><i>Not available</i> |
|---------------|----------------|----------------------------|------------|--------------------------------------------------------|-------------------------------------------------------|--------------------------------------------------------|-------------------------------------------------------|------------------------------------------------------|------------------------------------------------------|------------------------------------------------------|-----------------------------------------------------------|-----------------------------------------------------|-------------------------------------------------------|--------------------------------------------------------|------------------------------------------------------|-----------------------------------------------------|------------------------------------------------------|
|               |                | Malanil                    | 1          | 85                                                     | 14.3                                                  | 1                                                      | 1                                                     | 34                                                   | 25                                                   | 79                                                   | 134                                                       | 4                                                   | 99                                                    | 25.5                                                   | 8.3                                                  | 192                                                 | 119                                                  |
|               |                | Malanil                    | 2          | 87                                                     | 16                                                    | 1                                                      | 1                                                     | 22                                                   | 18                                                   | 70                                                   | 132.9                                                     | 3.9                                                 | 101.9                                                 | 27.5                                                   | 8                                                    | 87                                                  | 103                                                  |
|               |                | Malanil                    | 3          | 101                                                    | 13.5                                                  | 0.9                                                    | 0.8                                                   | 20                                                   | 15                                                   | 61                                                   | 132.3                                                     | 3.9                                                 | 100.5                                                 | 23.6                                                   | 7.8                                                  | 57                                                  | 95                                                   |
|               |                | Malanil                    | 7          | 85                                                     | 10                                                    | 0.9                                                    | 0.5                                                   | 27                                                   | 19                                                   | 50                                                   | 136.2                                                     | 3.7                                                 | 102.5                                                 | 23.9                                                   | 7.4                                                  | 163                                                 | 95                                                   |
|               |                | Malanil                    | 14         | 70                                                     | 10.4                                                  | 0.9                                                    | 0.5                                                   | 25                                                   | 22                                                   | 63                                                   | 137.9                                                     | 4.6                                                 | 103.7                                                 | 25.9                                                   | 7.4                                                  | 179                                                 | 145                                                  |
|               |                | Sevuparin/DF02+<br>Malanil | 1          | 89                                                     | 9.5                                                   | 1.1                                                    | 1.7                                                   | 31                                                   | 25                                                   | 74                                                   | 135.9                                                     | 4.5                                                 | 97                                                    | 23.4                                                   | 8.3                                                  | 68                                                  | 145                                                  |
|               |                | Sevuparin/DF02+<br>Malanil | 2          | 113                                                    | 11.6                                                  | 0.9                                                    | 1.2                                                   | 38                                                   | 28                                                   | 133                                                  | 130.8                                                     | 3.8                                                 | 98                                                    | 25.5                                                   | 7.5                                                  | 37                                                  | 193                                                  |
|               |                | Sevuparin/DF02+<br>Malanil | 3          | 108                                                    | 10.2                                                  | 0.8                                                    | 1.1                                                   | 22                                                   | 19                                                   | 137                                                  | 132                                                       | 3.5                                                 | 95.7                                                  | 15.5                                                   | 7.7                                                  | 22                                                  | 199                                                  |
|               |                | Sevuparin/DF02+<br>Malanil | 7          | 92                                                     | 12.7                                                  | 0.8                                                    | 0.7                                                   | 39                                                   | 43                                                   | 145                                                  | 138.2                                                     | 4.4                                                 | 102.7                                                 | 23.1                                                   | 8.1                                                  | 31                                                  | 147                                                  |
|               |                | Sevuparin/DF02+<br>Malanil | 14         | 80                                                     | 10.9                                                  | 1.1                                                    | 0.9                                                   | 21                                                   | 18                                                   | 109                                                  | 139.3                                                     | 4.3                                                 | 106.4                                                 | 25                                                     | 8                                                    | 118                                                 | 176                                                  |
|               |                | Sevuparin/DF02+<br>Malanil | 1          | 107                                                    | 12                                                    | 0.7                                                    | 1.6                                                   | 30                                                   | 35                                                   | 79                                                   | 129                                                       | 3.3                                                 | 88                                                    | 24.6                                                   | 8.3                                                  | 52                                                  | 186                                                  |
|               |                | Sevuparin/DF02+<br>Malanil | 2          | 122                                                    | 7.5                                                   | 0.7                                                    | 1.2                                                   | 57                                                   | 33                                                   | 82                                                   | 129.6                                                     | 3.6                                                 | 95.4                                                  | 22.3                                                   | 7.1                                                  | 27                                                  | 172                                                  |
|               |                | Sevuparin/DF02+<br>Malanil | 3          | 93                                                     | 4.6                                                   | 0.7                                                    | 0.8                                                   | 108                                                  | 52                                                   | 123                                                  | 133.9                                                     | 3.6                                                 | 102.1                                                 | 24.5                                                   | 7.1                                                  | 29                                                  | 193                                                  |
|               |                | Sevuparin/DF02+<br>Malanil | 7          | 90                                                     | 4.4                                                   | 0.8                                                    | 0.9                                                   | 52                                                   | 89                                                   | 117                                                  | 144.7                                                     | 4.4                                                 | 109.2                                                 | 21.9                                                   | 8.1                                                  | 59                                                  | 151                                                  |
|               |                | Sevuparin/DF02+<br>Malanil | 14         | 86                                                     | 13.4                                                  | 0.9                                                    | 0.6                                                   | 44                                                   | 29                                                   | 80                                                   | 142.1                                                     | 5.4                                                 | 105.7                                                 | 20.6                                                   | 9                                                    | 352                                                 | 262                                                  |

## TSM02 Individual subject listings part 2

## CSR Appendix 16.2

| SUBJID | INITIAL | ARM                        | DAY | GLUC<br>(mg/dL)<br>999=<br>Not available | BUN<br>(mg/dL)<br>999=<br>Not available | CREAT<br>(mg/dL)<br>99=<br>Not available | BILI<br>(mg/dL)<br>99=<br>Not available | AST<br>(U/L)<br>9999=<br>Not available | ALT<br>(U/L)<br>9999=<br>Not available | ALP<br>(U/L)<br>9999=<br>Not available | SODIUM<br>(mmol/L)<br>999=<br>Not available | K<br>(mmol/L)<br>99=<br>Not available | CL<br>(mmol/L)<br>999=<br>Not available | CO2<br>(mmol/L)<br>999=<br>Not available | CA<br>(mmol/L)<br>99=<br>Not available | CK<br>(U/L)<br>9999=<br>Not available | LDH<br>(U/L)<br>9999=<br>Not available |
|--------|---------|----------------------------|-----|------------------------------------------|-----------------------------------------|------------------------------------------|-----------------------------------------|----------------------------------------|----------------------------------------|----------------------------------------|---------------------------------------------|---------------------------------------|-----------------------------------------|------------------------------------------|----------------------------------------|---------------------------------------|----------------------------------------|
|        |         | Sevuparin/DF02+<br>Malanil | 1   | 127                                      | 12.8                                    | 0.9                                      | 2                                       | 45                                     | 52                                     | 124                                    | 137.2                                       | 3.1                                   | 100.4                                   | 22.4                                     | 7.8                                    | 118                                   | 173                                    |
|        |         | Sevuparin/DF02+<br>Malanil | 2   | 127                                      | 11.8                                    | 0.7                                      | 1.1                                     | 41                                     | 51                                     | 103                                    | 136.4                                       | 3.9                                   | 97                                      | 24.7                                     | 7                                      | 46                                    | 169                                    |
|        |         | Sevuparin/DF02+<br>Malanil | 3   | 108                                      | 12.9                                    | 0.7                                      | 0.8                                     | 34                                     | 43                                     | 95                                     | 136.1                                       | 4                                     | 100.2                                   | 23                                       | 7.4                                    | 30                                    | 142                                    |
|        |         | Sevuparin/DF02+<br>Malanil | 7   | 88                                       | 12.3                                    | 0.7                                      | 3.4                                     | 32                                     | 35                                     | 70                                     | 137.7                                       | 4.1                                   | 105.9                                   | 22.2                                     | 7.5                                    | 67                                    | 261                                    |
|        |         | Sevuparin/DF02+<br>Malanil | 14  | 100                                      | 9.3                                     | 0.8                                      | 1.5                                     | 27                                     | 24                                     | 80                                     | 139.6                                       | 4.3                                   | 107.1                                   | 18.5                                     | 8.6                                    | 81                                    | 329                                    |
|        |         | Sevuparin/DF02+<br>Malanil | 1   | 123                                      | 18.1                                    | 1                                        | 1.4                                     | 21                                     | 19                                     | 85                                     | 136.2                                       | 3.3                                   | 102.8                                   | 26.2                                     | 7.9                                    | 85                                    | 144                                    |
|        |         | Sevuparin/DF02+<br>Malanil | 2   | 108                                      | 14                                      | 0.8                                      | 1.1                                     | 21                                     | 17                                     | 70                                     | 132.6                                       | 4                                     | 100.3                                   | 21.3                                     | 6.6                                    | 41                                    | 194                                    |
|        |         | Sevuparin/DF02+<br>Malanil | 3   | 114                                      | 14.5                                    | 0.8                                      | 0.8                                     | 17                                     | 15                                     | 68                                     | 132.6                                       | 3.3                                   | 100.8                                   | 21.9                                     | 7                                      | 27                                    | 220                                    |
|        |         | Sevuparin/DF02+<br>Malanil | 7   | 101                                      | 8.5                                     | 1                                        | 0.6                                     | 28                                     | 24                                     | 67                                     | 136.1                                       | 4.5                                   | 100.7                                   | 26.4                                     | 8.5                                    | 44                                    | 216                                    |
|        |         | Sevuparin/DF02+<br>Malanil | 14  | 143                                      | 5.8                                     | 0.6                                      | 0.6                                     | 33                                     | 32                                     | 81                                     | 137.2                                       | 4                                     | 103.8                                   | 20                                       | 8.3                                    | 96                                    | 232                                    |
|        |         | Malanil                    | 1   | 139                                      | 6                                       | 1                                        | 1                                       | 50                                     | 36                                     | 57                                     | 139.3                                       | 2.7                                   | 105.4                                   | 22.7                                     | 8.1                                    | 121                                   | 212                                    |
|        |         | Malanil                    | 2   | 153                                      | 6.6                                     | 0.8                                      | 1.3                                     | 29                                     | 31                                     | 55                                     | 137.5                                       | 2.6                                   | 103.4                                   | 20.8                                     | 8                                      | 59                                    | 308                                    |
|        |         | Malanil                    | 3   | 139                                      | 10.5                                    | 0.9                                      | 1                                       | 17                                     | 23                                     | 54                                     | 138.4                                       | 3.7                                   | 105.2                                   | 26.3                                     | 8.6                                    | 40                                    | 182                                    |
|        |         | Malanil                    | 7   | 122                                      | 7.7                                     | 0.7                                      | 0.8                                     | 13                                     | 15                                     | 45                                     | 141.4                                       | 3.1                                   | 104.7                                   | 25.9                                     | 8.4                                    | 54                                    | 149                                    |
|        |         | Malanil                    | 14  | 114                                      | 4.3                                     | 0.6                                      | 0.6                                     | 14                                     | 9                                      | 46                                     | 142.5                                       | 3.3                                   | 105.7                                   | 26.1                                     | 7.5                                    | 88                                    | 144                                    |

## TSM02 Individual subject listings part 2

## CSR Appendix 16.2

| <b>SUBJID</b> | <b>INITIAL</b> | <b>ARM</b>                 | <b>DAY</b> | <b>GLUC</b><br>(mg/dL)<br>999=<br><i>Not available</i> | <b>BUN</b><br>(mg/dL)<br>999=<br><i>Not available</i> | <b>CREAT</b><br>(mg/dL)<br>99=<br><i>Not available</i> | <b>BILI</b><br>(mg/dL)<br>99=<br><i>Not available</i> | <b>AST</b><br>(U/L)<br>9999=<br><i>Not available</i> | <b>ALT</b><br>(U/L)<br>9999=<br><i>Not available</i> | <b>ALP</b><br>(U/L)<br>9999=<br><i>Not available</i> | <b>SODIUM</b><br>(mmol/L)<br>999=<br><i>Not available</i> | <b>K</b><br>(mmol/L)<br>99=<br><i>Not available</i> | <b>CL</b><br>(mmol/L)<br>999=<br><i>Not available</i> | <b>CO2</b><br>(mmol/L)<br>999=<br><i>Not available</i> | <b>CA</b><br>(mmol/L)<br>99=<br><i>Not available</i> | <b>CK</b><br>(U/L)<br>9999=<br><i>Not available</i> | <b>LDH</b><br>(U/L)<br>9999=<br><i>Not available</i> |
|---------------|----------------|----------------------------|------------|--------------------------------------------------------|-------------------------------------------------------|--------------------------------------------------------|-------------------------------------------------------|------------------------------------------------------|------------------------------------------------------|------------------------------------------------------|-----------------------------------------------------------|-----------------------------------------------------|-------------------------------------------------------|--------------------------------------------------------|------------------------------------------------------|-----------------------------------------------------|------------------------------------------------------|
|               |                | Malanil                    | 1          | 119                                                    | 14.5                                                  | 1.1                                                    | 1.5                                                   | 21                                                   | 17                                                   | 53                                                   | 138.7                                                     | 4                                                   | 104.8                                                 | 22.3                                                   | 8.4                                                  | 94                                                  | 143                                                  |
|               |                | Malanil                    | 2          | 188                                                    | 10.5                                                  | 1.1                                                    | 1.6                                                   | 25                                                   | 17                                                   | 47                                                   | 135.7                                                     | 3.8                                                 | 100.9                                                 | 25.5                                                   | 8.2                                                  | 61                                                  | 248                                                  |
|               |                | Malanil                    | 3          | 124                                                    | 14.9                                                  | 1.1                                                    | 1.1                                                   | 16                                                   | 17                                                   | 47                                                   | 134.5                                                     | 4                                                   | 103.4                                                 | 21.6                                                   | 8.4                                                  | 31                                                  | 173                                                  |
|               |                | Malanil                    | 7          | 91                                                     | 11.6                                                  | 0.7                                                    | 0.5                                                   | 20                                                   | 23                                                   | 47                                                   | 139.1                                                     | 4.4                                                 | 105.6                                                 | 22                                                     | 8.8                                                  | 112                                                 | 158                                                  |
|               |                | Malanil                    | 14         | 100                                                    | 7.8                                                   | 1                                                      | 0.5                                                   | 20                                                   | 16                                                   | 49                                                   | 140.8                                                     | 4                                                   | 104.6                                                 | 27                                                     | 8.1                                                  | 191                                                 | 130                                                  |
|               |                | Malanil                    | 1          | 121                                                    | 10.8                                                  | 1.1                                                    | 3.1                                                   | 30                                                   | 19                                                   | 88                                                   | 134.7                                                     | 3.4                                                 | 102.5                                                 | 21.5                                                   | 8.3                                                  | 70                                                  | 195                                                  |
|               |                | Malanil                    | 2          | 162                                                    | 17                                                    | 1                                                      | 1.9                                                   | 56                                                   | 58                                                   | 96                                                   | 135.8                                                     | 3.6                                                 | 104.2                                                 | 21.5                                                   | 8.2                                                  | 41                                                  | 204                                                  |
|               |                | Malanil                    | 3          | 149                                                    | 13.5                                                  | 1.1                                                    | 1.9                                                   | 49                                                   | 65                                                   | 102                                                  | 134.8                                                     | 3.9                                                 | 103.2                                                 | 23.8                                                   | 8.1                                                  | 30                                                  | 164                                                  |
|               |                | Malanil                    | 7          | 107                                                    | 6.8                                                   | 0.7                                                    | 1.5                                                   | 44                                                   | 84                                                   | 127                                                  | 135.7                                                     | 3.6                                                 | 103.3                                                 | 21.2                                                   | 8.4                                                  | 83                                                  | 167                                                  |
|               |                | Malanil                    | 14         | 109                                                    | 9.2                                                   | 0.7                                                    | 0.9                                                   | 37                                                   | 33                                                   | 124                                                  | 140.5                                                     | 3.4                                                 | 102.2                                                 | 21.8                                                   | 7.9                                                  | 110                                                 | 204                                                  |
|               |                | Sevuparin/DF02+<br>Malanil | 1          | 131                                                    | 11                                                    | 1.1                                                    | 2.2                                                   | 33                                                   | 32                                                   | 44                                                   | 130.7                                                     | 3.4                                                 | 97.9                                                  | 28.9                                                   | 8                                                    | 44                                                  | 308                                                  |
|               |                | Sevuparin/DF02+<br>Malanil | 2          | 153                                                    | 10.7                                                  | 0.9                                                    | 1.3                                                   | 39                                                   | 35                                                   | 36                                                   | 134.4                                                     | 3.3                                                 | 97.7                                                  | 30.8                                                   | 7.3                                                  | 27                                                  | 281                                                  |
|               |                | Sevuparin/DF02+<br>Malanil | 3          | 127                                                    | 7.7                                                   | 0.9                                                    | 1.1                                                   | 78                                                   | 62                                                   | 57                                                   | 134.5                                                     | 3.5                                                 | 101.3                                                 | 27.8                                                   | 7.3                                                  | 31                                                  | 358                                                  |
|               |                | Sevuparin/DF02+<br>Malanil | 7          | 104                                                    | 7.3                                                   | 0.9                                                    | 0.8                                                   | 451                                                  | 391                                                  | 138                                                  | 138.8                                                     | 4                                                   | 103.5                                                 | 24.2                                                   | 7.9                                                  | 83                                                  | 431                                                  |
|               |                | Sevuparin/DF02+<br>Malanil | 14         | 100                                                    | 9.5                                                   | 0.9                                                    | 2                                                     | 45                                                   | 380                                                  | 208                                                  | 137.2                                                     | 4.5                                                 | 105.9                                                 | 22                                                     | 7.7                                                  | 92                                                  | 521                                                  |
|               |                | Malanil                    | 1          | 156                                                    | 17.2                                                  | 1.5                                                    | 3                                                     | 24                                                   | 18                                                   | 52                                                   | 129.5                                                     | 3.2                                                 | 90.1                                                  | 23.6                                                   | 8.4                                                  | 154                                                 | 196                                                  |
|               |                | Malanil                    | 2          | 148                                                    | 16.6                                                  | 1.2                                                    | 2.2                                                   | 14                                                   | 17                                                   | 68                                                   | 128.1                                                     | 3.1                                                 | 92.4                                                  | 24.8                                                   | 8.2                                                  | 66                                                  | 245                                                  |
|               |                | Malanil                    | 3          | 147                                                    | 20.3                                                  | 1.1                                                    | 2.2                                                   | 16                                                   | 16                                                   | 63                                                   | 132.8                                                     | 3.1                                                 | 90.7                                                  | 25.2                                                   | 8.1                                                  | 33                                                  | 216                                                  |

TSM02 Individual subject listings part 2

CSR Appendix 16.2

| <b>SUBJID</b> | <b>INITIAL</b> | <b>ARM</b>      | <b>DAY</b> | <b>GLUC</b><br>(mg/dL)<br>999=<br><i>Not available</i> | <b>BUN</b><br>(mg/dL)<br>999=<br><i>Not available</i> | <b>CREAT</b><br>(mg/dL)<br>99=<br><i>Not available</i> | <b>BILI</b><br>(mg/dL)<br>99=<br><i>Not available</i> | <b>AST</b><br>(U/L)<br>9999=<br><i>Not available</i> | <b>ALT</b><br>(U/L)<br>9999=<br><i>Not available</i> | <b>ALP</b><br>(U/L)<br>9999=<br><i>Not available</i> | <b>SODIUM</b><br>(mmol/L)<br>999=<br><i>Not available</i> | <b>K</b><br>(mmol/L)<br>99=<br><i>Not available</i> | <b>CL</b><br>(mmol/L)<br>999=<br><i>Not available</i> | <b>CO2</b><br>(mmol/L)<br>999=<br><i>Not available</i> | <b>CA</b><br>(mmol/L)<br>99=<br><i>Not available</i> | <b>CK</b><br>(U/L)<br>9999=<br><i>Not available</i> | <b>LDH</b><br>(U/L)<br>9999=<br><i>Not available</i> |
|---------------|----------------|-----------------|------------|--------------------------------------------------------|-------------------------------------------------------|--------------------------------------------------------|-------------------------------------------------------|------------------------------------------------------|------------------------------------------------------|------------------------------------------------------|-----------------------------------------------------------|-----------------------------------------------------|-------------------------------------------------------|--------------------------------------------------------|------------------------------------------------------|-----------------------------------------------------|------------------------------------------------------|
|               |                | Malanil         | 7          | 119                                                    | 15.1                                                  | 1                                                      | 0.9                                                   | 20                                                   | 25                                                   | 56                                                   | 135.7                                                     | 4                                                   | 97.6                                                  | 29.6                                                   | 8                                                    | 52                                                  | 212                                                  |
|               |                | Malanil         | 14         | 106                                                    | 8.6                                                   | 1.1                                                    | 1.1                                                   | 19                                                   | 29                                                   | 61                                                   | 139.1                                                     | 4.4                                                 | 105.6                                                 | 29                                                     | 8.1                                                  | 114                                                 | 228                                                  |
|               |                | Malanil         | 1          | 215                                                    | 13.2                                                  | 1.1                                                    | 1.2                                                   | 19                                                   | 14                                                   | 55                                                   | 135.4                                                     | 4.3                                                 | 100.8                                                 | 25.9                                                   | 8.2                                                  | 63                                                  | 112                                                  |
|               |                | Malanil         | 2          | 175                                                    | 14.6                                                  | 0.9                                                    | 1.3                                                   | 17                                                   | 11                                                   | 46                                                   | 131.6                                                     | 3.7                                                 | 99.6                                                  | 22.2                                                   | 7.7                                                  | 40                                                  | 117                                                  |
|               |                | Malanil         | 3          | 149                                                    | 6.8                                                   | 1                                                      | 1                                                     | 18                                                   | 12                                                   | 45                                                   | 135.7                                                     | 3.8                                                 | 100.4                                                 | 23.2                                                   | 8.1                                                  | 39                                                  | 146                                                  |
|               |                | Malanil         | 7          | 103                                                    | 15.5                                                  | 0.8                                                    | 0.6                                                   | 14                                                   | 12                                                   | 56                                                   | 138.9                                                     | 4                                                   | 103.1                                                 | 27.3                                                   | 8                                                    | 81                                                  | 131                                                  |
|               |                | Malanil         | 14         | 84                                                     | 10.4                                                  | 0.9                                                    | 0.8                                                   | 18                                                   | 9                                                    | 57                                                   | 140.6                                                     | 3.8                                                 | 105                                                   | 24.1                                                   | 8.2                                                  | 106                                                 | 152                                                  |
|               |                | Malanil         | 1          | 119                                                    | 8.5                                                   | 0.8                                                    | 1.6                                                   | 79                                                   | 82                                                   | 64                                                   | 138.4                                                     | 3.5                                                 | 100                                                   | 26.3                                                   | 7.7                                                  | 298                                                 | 196                                                  |
|               |                | Malanil         | 2          | 180                                                    | 6.5                                                   | 0.9                                                    | 1.6                                                   | 78                                                   | 65                                                   | 58                                                   | 131.1                                                     | 3.1                                                 | 98.6                                                  | 27.6                                                   | 7.8                                                  | 117                                                 | 273                                                  |
|               |                | Malanil         | 3          | 116                                                    | 8.8                                                   | 0.7                                                    | 1.4                                                   | 71                                                   | 59                                                   | 57                                                   | 135.2                                                     | 3.5                                                 | 102.6                                                 | 21.8                                                   | 7.7                                                  | 50                                                  | 258                                                  |
|               |                | Malanil         | 7          | 107                                                    | 4.8                                                   | 0.8                                                    | 1.1                                                   | 143                                                  | 78                                                   | 66                                                   | 145.3                                                     | 3.6                                                 | 108                                                   | 20.2                                                   | 7.5                                                  | 112                                                 | 287                                                  |
|               |                | Malanil         | 14         | 100                                                    | 13                                                    | 0.8                                                    | 1.1                                                   | 160                                                  | 73                                                   | 45                                                   | 143.6                                                     | 3.8                                                 | 106.1                                                 | 26.8                                                   | 8                                                    | 125                                                 | 245                                                  |
|               |                | Malanil         | 1          | 123                                                    | 12                                                    | 1.1                                                    | 1.6                                                   | 22                                                   | 22                                                   | 83                                                   | 137.9                                                     | 3.7                                                 | 102.4                                                 | 23.2                                                   | 8.1                                                  | 93                                                  | 131                                                  |
|               |                | Malanil         | 2          | 166                                                    | 10.1                                                  | 1.2                                                    | 1.5                                                   | 17                                                   | 19                                                   | 73                                                   | 133                                                       | 3.6                                                 | 103.1                                                 | 20.5                                                   | 7.9                                                  | 46                                                  | 188                                                  |
|               |                | Malanil         | 3          | 130                                                    | 11.8                                                  | 1                                                      | 1.3                                                   | 18                                                   | 22                                                   | 73                                                   | 136                                                       | 3.9                                                 | 102.7                                                 | 21.2                                                   | 8.3                                                  | 35                                                  | 177                                                  |
|               |                | Malanil         | 7          | 99                                                     | 10.4                                                  | 0.9                                                    | 1.5                                                   | 27                                                   | 42                                                   | 77                                                   | 142.4                                                     | 3.9                                                 | 105.4                                                 | 19.9                                                   | 8.4                                                  | 106                                                 | 165                                                  |
|               |                | Malanil         | 14         | 79                                                     | 8.6                                                   | 1.1                                                    | 0.8                                                   | 20                                                   | 28                                                   | 54                                                   | 138                                                       | 4.4                                                 | 103.3                                                 | 26.4                                                   | 8.6                                                  | 114                                                 | 120                                                  |
|               |                | Sevuparin/DF02+ | 1          | 161                                                    | 17                                                    | 0.9                                                    | 2                                                     | 11                                                   | 10                                                   | 132                                                  | 132.9                                                     | 4.1                                                 | 100.6                                                 | 21.5                                                   | 7.9                                                  | 50                                                  | 151                                                  |

## TSM02 Individual subject listings part 2

## CSR Appendix 16.2

| SUBJID | INITIAL | ARM                        | DAY | GLUC<br>(mg/dL)<br>999=<br>Not available | BUN<br>(mg/dL)<br>999=<br>Not available | CREAT<br>(mg/dL)<br>99=<br>Not available | BILI<br>(mg/dL)<br>99=<br>Not available | AST<br>(U/L)<br>9999=<br>Not available | ALT<br>(U/L)<br>9999=<br>Not available | ALP<br>(U/L)<br>9999=<br>Not available | SODIUM<br>(mmol/L)<br>999=<br>Not available | K<br>(mmol/L)<br>99=<br>Not available | CL<br>(mmol/L)<br>999=<br>Not available | CO2<br>(mmol/L)<br>999=<br>Not available | CA<br>(mmol/L)<br>99=<br>Not available | CK<br>(U/L)<br>9999=<br>Not available | LDH<br>(U/L)<br>9999=<br>Not available |
|--------|---------|----------------------------|-----|------------------------------------------|-----------------------------------------|------------------------------------------|-----------------------------------------|----------------------------------------|----------------------------------------|----------------------------------------|---------------------------------------------|---------------------------------------|-----------------------------------------|------------------------------------------|----------------------------------------|---------------------------------------|----------------------------------------|
|        |         | Malanil                    |     |                                          |                                         |                                          |                                         |                                        |                                        |                                        |                                             |                                       |                                         |                                          |                                        |                                       |                                        |
|        |         | Sevuparin/DF02+<br>Malanil | 2   | 143                                      | 15.3                                    | 1                                        | 1.6                                     | 18                                     | 11                                     | 100                                    | 126.3                                       | 3.6                                   | 98.2                                    | 19.8                                     | 7.4                                    | 23                                    | 246                                    |
|        |         | Sevuparin/DF02+<br>Malanil | 3   | 97                                       | 16.7                                    | 0.8                                      | 1                                       | 14                                     | 10                                     | 91                                     | 132.8                                       | 4                                     | 101                                     | 18.8                                     | 7.8                                    | 15                                    | 202                                    |
|        |         | Sevuparin/DF02+<br>Malanil | 7   | 76                                       | 10                                      | 0.8                                      | 0.8                                     | 25                                     | 29                                     | 97                                     | 141.4                                       | 4                                     | 104.4                                   | 19.7                                     | 8.3                                    | 42                                    | 163                                    |
|        |         | Sevuparin/DF02+<br>Malanil | 14  | 82                                       | 9.3                                     | 0.9                                      | 0.5                                     | 17                                     | 15                                     | 78                                     | 138.1                                       | 4.2                                   | 103                                     | 26.9                                     | 8.3                                    | 79                                    | 234                                    |
|        |         | Malanil                    | 1   | 187                                      | 15.3                                    | 1.1                                      | 2.7                                     | 19                                     | 20                                     | 84                                     | 136.7                                       | 3.8                                   | 100.6                                   | 25.5                                     | 8.4                                    | 82                                    | 188                                    |
|        |         | Malanil                    | 2   | 81                                       | 21.2                                    | 0.9                                      | 1.7                                     | 19                                     | 18                                     | 75                                     | 136.5                                       | 3.9                                   | 102                                     | 18.4                                     | 8.3                                    | 45                                    | 174                                    |
|        |         | Malanil                    | 3   | 130                                      | 18                                      | 0.9                                      | 1.6                                     | 14                                     | 13                                     | 56                                     | 132.8                                       | 3.8                                   | 104.2                                   | 26.2                                     | 7.5                                    | 36                                    | 192                                    |
|        |         | Malanil                    | 7   | 84                                       | 6.9                                     | 0.8                                      | 1.2                                     | 22                                     | 23                                     | 66                                     | 141                                         | 3.6                                   | 105.9                                   | 20.2                                     | 7.8                                    | 62                                    | 170                                    |
|        |         | Malanil                    | 14  | 89                                       | 14.8                                    | 1                                        | 1.5                                     | 25                                     | 29                                     | 54                                     | 139.3                                       | 4.2                                   | 103.3                                   | 25.4                                     | 7.9                                    | 116                                   | 248                                    |
|        |         | Malanil                    | 1   | 98                                       | 15                                      | 0.8                                      | 1.4                                     | 45                                     | 39                                     | 79                                     | 135.5                                       | 3.5                                   | 104.5                                   | 27.4                                     | 7.4                                    | 180                                   | 194                                    |
|        |         | Malanil                    | 2   | 141                                      | 6                                       | 0.9                                      | 1.3                                     | 36                                     | 38                                     | 100                                    | 135.3                                       | 3.5                                   | 105                                     | 22                                       | 7.7                                    | 85                                    | 193                                    |
|        |         | Malanil                    | 3   | 99                                       | 17.7                                    | 0.8                                      | 1.1                                     | 29                                     | 34                                     | 97                                     | 137.3                                       | 3.7                                   | 106.1                                   | 20.1                                     | 7.6                                    | 63                                    | 168                                    |
|        |         | Malanil                    | 7   | 91                                       | 10.5                                    | 0.8                                      | 1.2                                     | 27                                     | 26                                     | 82                                     | 139.9                                       | 3.9                                   | 106.4                                   | 23                                       | 7.6                                    | 111                                   | 188                                    |
|        |         | Malanil                    | 14  | 149                                      | 17.5                                    | 0.8                                      | 1.7                                     | 29                                     | 20                                     | 89                                     | 137.3                                       | 3.6                                   | 103.1                                   | 23.4                                     | 7.7                                    | 114                                   | 198                                    |
|        |         | Malanil                    | 1   | 120                                      | 11.7                                    | 0.9                                      | 0.9                                     | 45                                     | 29                                     | 56                                     | 135                                         | 2.7                                   | 104.3                                   | 24.7                                     | 7.4                                    | 138                                   | 220                                    |
|        |         | Malanil                    | 2   | 129                                      | 11.2                                    | 0.9                                      | 0.7                                     | 35                                     | 28                                     | 62                                     | 135.1                                       | 3.1                                   | 104.2                                   | 26.2                                     | 6.7                                    | 93                                    | 208                                    |
|        |         | Malanil                    | 3   | 127                                      | 7.5                                     | 1                                        | 0.7                                     | 49                                     | 44                                     | 87                                     | 140.1                                       | 3                                     | 105.8                                   | 25.3                                     | 7.5                                    | 83                                    | 298                                    |
|        |         | Malanil                    | 7   | 107                                      | 8.9                                     | 1                                        | 0.6                                     | 41                                     | 40                                     | 65                                     | 139.2                                       | 3.6                                   | 103.8                                   | 28.7                                     | 7                                      | 178                                   | 306                                    |

## TSM02 Individual subject listings part 2

## CSR Appendix 16.2

| SUBJID | INITIAL | ARM                        | DAY | GLUC<br>(mg/dL)<br>999=<br>Not available | BUN<br>(mg/dL)<br>999=<br>Not available | CREAT<br>(mg/dL)<br>99=<br>Not available | BILI<br>(mg/dL)<br>99=<br>Not available | AST<br>(U/L)<br>9999=<br>Not available | ALT<br>(U/L)<br>9999=<br>Not available | ALP<br>(U/L)<br>9999=<br>Not available | SODIUM<br>(mmol/L)<br>999=<br>Not available | K<br>(mmol/L)<br>99=<br>Not available | CL<br>(mmol/L)<br>999=<br>Not available | CO2<br>(mmol/L)<br>999=<br>Not available | CA<br>(mmol/L)<br>99=<br>Not available | CK<br>(U/L)<br>9999=<br>Not available | LDH<br>(U/L)<br>9999=<br>Not available |
|--------|---------|----------------------------|-----|------------------------------------------|-----------------------------------------|------------------------------------------|-----------------------------------------|----------------------------------------|----------------------------------------|----------------------------------------|---------------------------------------------|---------------------------------------|-----------------------------------------|------------------------------------------|----------------------------------------|---------------------------------------|----------------------------------------|
|        |         | Malanil                    | 14  | 102                                      | 4.1                                     | 1.1                                      | 0.9                                     | 29                                     | 25                                     | 81                                     | 138.5                                       | 4.4                                   | 101.2                                   | 24.1                                     | 8                                      | 157                                   | 298                                    |
|        |         | Sevuparin/DF02+<br>Malanil | 1   | 144                                      | 18.5                                    | 1.2                                      | 5.7                                     | 27                                     | 24                                     | 60                                     | 125.9                                       | 3.3                                   | 93.9                                    | 24.1                                     | 7.9                                    | 122                                   | 161                                    |
|        |         | Sevuparin/DF02+<br>Malanil | 2   | 90                                       | 15.2                                    | 0.8                                      | 2.4                                     | 24                                     | 22                                     | 48                                     | 136                                         | 3.1                                   | 98.9                                    | 20.4                                     | 6.9                                    | 55                                    | 160                                    |
|        |         | Sevuparin/DF02+<br>Malanil | 3   | 98                                       | 11.9                                    | 1                                        | 2.9                                     | 22                                     | 22                                     | 59                                     | 137.4                                       | 3.2                                   | 96.8                                    | 22.9                                     | 7.2                                    | 34                                    | 186                                    |
|        |         | Sevuparin/DF02+<br>Malanil | 7   | 106                                      | 7.2                                     | 0.5                                      | 1.1                                     | 23                                     | 26                                     | 56                                     | 140.9                                       | 3.7                                   | 105.1                                   | 24                                       | 7.4                                    | 47                                    | 140                                    |
|        |         | Sevuparin/DF02+<br>Malanil | 14  | 113                                      | 9.2                                     | 0.9                                      | 1                                       | 22                                     | 21                                     | 52                                     | 140.5                                       | 3.8                                   | 108.4                                   | 24.3                                     | 8.3                                    | 61                                    | 150                                    |
|        |         | Sevuparin/DF02+<br>Malanil | 1   | 107                                      | 9.2                                     | 0.9                                      | 0.6                                     | 18                                     | 10                                     | 128                                    | 138.5                                       | 3.7                                   | 103.8                                   | 23.8                                     | 9                                      | 117                                   | 133                                    |
|        |         | Sevuparin/DF02+<br>Malanil | 2   | 107                                      | 8.5                                     | 0.7                                      | 0.5                                     | 16                                     | 11                                     | 126                                    | 138                                         | 3.4                                   | 100.5                                   | 25.4                                     | 9                                      | 54                                    | 138                                    |
|        |         | Sevuparin/DF02+<br>Malanil | 3   | 86                                       | 8.6                                     | 0.9                                      | 0.7                                     | 17                                     | 18                                     | 119                                    | 137.8                                       | 3.7                                   | 102.5                                   | 23.5                                     | 9.1                                    | 43                                    | 132                                    |
|        |         | Sevuparin/DF02+<br>Malanil | 7   | 103                                      | 11.7                                    | 0.9                                      | 0.7                                     | 69                                     | 82                                     | 87                                     | 137.8                                       | 4                                     | 100.3                                   | 23.1                                     | 9.5                                    | 118                                   | 175                                    |
|        |         | Sevuparin/DF02+<br>Malanil | 14  | 130                                      | 8.9                                     | 0.9                                      | 0.7                                     | 24                                     | 20                                     | 90                                     | 141.7                                       | 3.8                                   | 103.1                                   | 26.2                                     | 9.2                                    | 189                                   | 112                                    |
|        |         | Sevuparin/DF02+<br>Malanil | 1   | 128                                      | 16.7                                    | 1                                        | 1.2                                     | 26                                     | 41                                     | 123                                    | 138                                         | 3.9                                   | 104.4                                   | 25.9                                     | 8                                      | 66                                    | 166                                    |
|        |         | Sevuparin/DF02+<br>Malanil | 2   | 124                                      | 13.3                                    | 0.9                                      | 1.4                                     | 17                                     | 31                                     | 122                                    | 135.5                                       | 3.8                                   | 103.2                                   | 28.1                                     | 8.1                                    | 35                                    | 197                                    |
|        |         | Sevuparin/DF02+<br>Malanil | 3   | 108                                      | 15                                      | 0.9                                      | 1.2                                     | 17                                     | 26                                     | 120                                    | 134.3                                       | 3.7                                   | 106.2                                   | 26.3                                     | 8.6                                    | 21                                    | 210                                    |

## TSM02 Individual subject listings part 2

## CSR Appendix 16.2

| SUBJID | INITIAL | ARM                        | DAY | GLUC<br>(mg/dL)<br>999=<br>Not available | BUN<br>(mg/dL)<br>999=<br>Not available | CREAT<br>(mg/dL)<br>99=<br>Not available | BILI<br>(mg/dL)<br>99=<br>Not available | AST<br>(U/L)<br>9999=<br>Not available | ALT<br>(U/L)<br>9999=<br>Not available | ALP<br>(U/L)<br>9999=<br>Not available | SODIUM<br>(mmol/L)<br>999=<br>Not available | K<br>(mmol/L)<br>99=<br>Not available | CL<br>(mmol/L)<br>999=<br>Not available | CO2<br>(mmol/L)<br>999=<br>Not available | CA<br>(mmol/L)<br>99=<br>Not available | CK<br>(U/L)<br>9999=<br>Not available | LDH<br>(U/L)<br>9999=<br>Not available |
|--------|---------|----------------------------|-----|------------------------------------------|-----------------------------------------|------------------------------------------|-----------------------------------------|----------------------------------------|----------------------------------------|----------------------------------------|---------------------------------------------|---------------------------------------|-----------------------------------------|------------------------------------------|----------------------------------------|---------------------------------------|----------------------------------------|
|        |         | Malanil                    |     |                                          |                                         |                                          |                                         |                                        |                                        |                                        |                                             |                                       |                                         |                                          |                                        |                                       |                                        |
|        |         | Sevuparin/DF02+<br>Malanil | 7   | 97                                       | 13.6                                    | 1                                        | 1.5                                     | 109                                    | 276                                    | 147                                    | 140.5                                       | 4.9                                   | 105.4                                   | 29.7                                     | 9.5                                    | 65                                    | 197                                    |
|        |         | Sevuparin/DF02+<br>Malanil | 14  | 100                                      | 9                                       | 0.9                                      | 1                                       | 32                                     | 95                                     | 101                                    | 138.4                                       | 4.1                                   | 106.7                                   | 26.3                                     | 8.9                                    | 66                                    | 245                                    |
|        |         | Sevuparin/DF02+<br>Malanil | 1   | 94                                       | 13.2                                    | 1.3                                      | 2.3                                     | 33                                     | 27                                     | 77                                     | 129.8                                       | 3.6                                   | 95.7                                    | 28.1                                     | 9.1                                    | 89                                    | 213                                    |
|        |         | Sevuparin/DF02+<br>Malanil | 2   | 138                                      | 14.9                                    | 1.1                                      | 1.4                                     | 24                                     | 24                                     | 79                                     | 129.3                                       | 3.3                                   | 101.3                                   | 26.6                                     | 8.5                                    | 59                                    | 221                                    |
|        |         | Sevuparin/DF02+<br>Malanil | 3   | 115                                      | 11.7                                    | 0.9                                      | 1.1                                     | 22                                     | 26                                     | 87                                     | 133.4                                       | 3.9                                   | 101.1                                   | 31.9                                     | 8.3                                    | 30                                    | 222                                    |
|        |         | Sevuparin/DF02+<br>Malanil | 7   | 101                                      | 6.4                                     | 1                                        | 0.9                                     | 51                                     | 65                                     | 65                                     | 136.7                                       | 3.4                                   | 107.9                                   | 27                                       | 8.9                                    | 71                                    | 180                                    |
|        |         | Sevuparin/DF02+<br>Malanil | 14  | 97                                       | 12.8                                    | 1.1                                      | 1.4                                     | 30                                     | 26                                     | 71                                     | 141.2                                       | 4.2                                   | 100.1                                   | 28.3                                     | 10.1                                   | 48                                    | 209                                    |
|        |         | Sevuparin/DF02+<br>Malanil | 1   | 109                                      | 14.9                                    | 1.1                                      | 0.8                                     | 25                                     | 25                                     | 66                                     | 132.3                                       | 3.5                                   | 102.4                                   | 26.7                                     | 9.2                                    | 85                                    | 159                                    |
|        |         | Sevuparin/DF02+<br>Malanil | 2   | 131                                      | 12.7                                    | 1                                        | 0.8                                     | 21                                     | 21                                     | 61                                     | 129.6                                       | 3.5                                   | 101.2                                   | 25.7                                     | 8.7                                    | 45                                    | 157                                    |
|        |         | Sevuparin/DF02+<br>Malanil | 3   | 93                                       | 12.3                                    | 0.9                                      | 0.9                                     | 16                                     | 19                                     | 59                                     | 132.3                                       | 3.5                                   | 102.6                                   | 26.3                                     | 8.8                                    | 36                                    | 161                                    |
|        |         | Sevuparin/DF02+<br>Malanil | 7   | 116                                      | 8                                       | 1                                        | 0.6                                     | 99                                     | 75                                     | 69                                     | 135                                         | 4.4                                   | 103                                     | 28.1                                     | 8.4                                    | 71                                    | 194                                    |
|        |         | Sevuparin/DF02+<br>Malanil | 14  | 92                                       | 10                                      | 0.9                                      | 0.6                                     | 29                                     | 39                                     | 57                                     | 139.8                                       | 4.1                                   | 103.2                                   | 26.9                                     | 9.1                                    | 100                                   | 129                                    |
|        |         | Malanil                    | 1   | 118                                      | 22                                      | 1.3                                      | 1.3                                     | 34                                     | 26                                     | 108                                    | 133.6                                       | 3.8                                   | 96.6                                    | 25.4                                     | 9.2                                    | 144                                   | 149                                    |

TSM02 Individual subject listings part 2

CSR Appendix 16.2

| <b>SUBJID</b> | <b>INITIAL</b> | <b>ARM</b> | <b>DAY</b> | <b>GLUC</b><br>(mg/dL)<br>999=<br><i>Not available</i> | <b>BUN</b><br>(mg/dL)<br>999=<br><i>Not available</i> | <b>CREAT</b><br>(mg/dL)<br>99=<br><i>Not available</i> | <b>BILI</b><br>(mg/dL)<br>99=<br><i>Not available</i> | <b>AST</b><br>(U/L)<br>9999=<br><i>Not available</i> | <b>ALT</b><br>(U/L)<br>9999=<br><i>Not available</i> | <b>ALP</b><br>(U/L)<br>9999=<br><i>Not available</i> | <b>SODIUM</b><br>(mmol/L)<br>999=<br><i>Not available</i> | <b>K</b><br>(mmol/L)<br>99=<br><i>Not available</i> | <b>CL</b><br>(mmol/L)<br>999=<br><i>Not available</i> | <b>CO2</b><br>(mmol/L)<br>999=<br><i>Not available</i> | <b>CA</b><br>(mmol/L)<br>99=<br><i>Not available</i> | <b>CK</b><br>(U/L)<br>9999=<br><i>Not available</i> | <b>LDH</b><br>(U/L)<br>9999=<br><i>Not available</i> |
|---------------|----------------|------------|------------|--------------------------------------------------------|-------------------------------------------------------|--------------------------------------------------------|-------------------------------------------------------|------------------------------------------------------|------------------------------------------------------|------------------------------------------------------|-----------------------------------------------------------|-----------------------------------------------------|-------------------------------------------------------|--------------------------------------------------------|------------------------------------------------------|-----------------------------------------------------|------------------------------------------------------|
|               |                | Malanil    | 2          | 99                                                     | 11.9                                                  | 0.9                                                    | 0.9                                                   | 36                                                   | 32                                                   | 88                                                   | 132                                                       | 3.8                                                 | 101.9                                                 | 26.8                                                   | 8.4                                                  | 13                                                  | 210                                                  |
|               |                | Malanil    | 3          | 78                                                     | 16.3                                                  | 0.9                                                    | 1.3                                                   | 25                                                   | 26                                                   | 93                                                   | 131.2                                                     | 4.1                                                 | 99.9                                                  | 24.9                                                   | 8.7                                                  | 53                                                  | 192                                                  |
|               |                | Malanil    | 7          | 96                                                     | 12.2                                                  | 0.9                                                    | 0.5                                                   | 28                                                   | 30                                                   | 73                                                   | 139                                                       | 4.4                                                 | 100.3                                                 | 30.7                                                   | 8.5                                                  | 53                                                  | 143                                                  |
|               |                | Malanil    | 14         | 90                                                     | 9.8                                                   | 0.9                                                    | 0.5                                                   | 18                                                   | 19                                                   | 92                                                   | 137.6                                                     | 4.3                                                 | 99.4                                                  | 27.2                                                   | 9.1                                                  | 85                                                  | 146                                                  |
|               |                | Malanil    | 1          | 99                                                     | 22.1                                                  | 1.2                                                    | 3.4                                                   | 45                                                   | 50                                                   | 152                                                  | 133.4                                                     | 3.7                                                 | 100.6                                                 | 22.4                                                   | 8.7                                                  | 48                                                  | 268                                                  |
|               |                | Malanil    | 2          | 101                                                    | 20                                                    | 0.9                                                    | 2                                                     | 44                                                   | 52                                                   | 109                                                  | 128.4                                                     | 3.5                                                 | 98                                                    | 22.9                                                   | 8.4                                                  | 36                                                  | 325                                                  |
|               |                | Malanil    | 3          | 115                                                    | 18.8                                                  | 0.3                                                    | 2.2                                                   | 44                                                   | 45                                                   | 151                                                  | 130.1                                                     | 4                                                   | 100.1                                                 | 25.9                                                   | 8.4                                                  | 26                                                  | 382                                                  |
|               |                | Malanil    | 7          | 81                                                     | 11                                                    | 1                                                      | 0.7                                                   | 112                                                  | 214                                                  | 331                                                  | 141.2                                                     | 4.3                                                 | 101.6                                                 | 28.2                                                   | 8.4                                                  | 41                                                  | 264                                                  |
|               |                | Malanil    | 14         | 98                                                     | 10.8                                                  | 0.9                                                    | 1.1                                                   | 38                                                   | 80                                                   | 224                                                  | 138.3                                                     | 4.2                                                 | 99.1                                                  | 28.3                                                   | 8.5                                                  | 80                                                  | 286                                                  |
|               |                | Malanil    | 1          | 96                                                     | 14.9                                                  | 0.8                                                    | 5.1                                                   | 29                                                   | 18                                                   | 80                                                   | 132.9                                                     | 3.8                                                 | 99                                                    | 25.7                                                   | 8.5                                                  | 50                                                  | 105                                                  |
|               |                | Malanil    | 2          | 125                                                    | 20.1                                                  | 0.9                                                    | 4.5                                                   | 23                                                   | 15                                                   | 66                                                   | 135.5                                                     | 3.2                                                 | 95.2                                                  | 25.5                                                   | 7.9                                                  | 36                                                  | 97                                                   |
|               |                | Malanil    | 3          | 90                                                     | 18.3                                                  | 0.8                                                    | 4.1                                                   | 27                                                   | 14                                                   | 61                                                   | 133.3                                                     | 3.9                                                 | 89.1                                                  | 26.8                                                   | 8.4                                                  | 36                                                  | 436                                                  |
|               |                | Malanil    | 7          | 77                                                     | 9.5                                                   | 0.9                                                    | 1.6                                                   | 24                                                   | 18                                                   | 85                                                   | 139.2                                                     | 3.5                                                 | 103.4                                                 | 30.4                                                   | 8.1                                                  | 52                                                  | 256                                                  |
|               |                | Malanil    | 14         | 105                                                    | 10.5                                                  | 1                                                      | 1.4                                                   | 21                                                   | 16                                                   | 107                                                  | 137                                                       | 3.8                                                 | 102.5                                                 | 25.5                                                   | 8.3                                                  | 95                                                  | 209                                                  |



TSM02 Individual subject listings part 2

CSR Appendix 16.2

16.2.8.2 Coagulation tests

| SUBJID | INITIAL | ARM                     | TIMEPOINT | APTT | PT   | INR  |
|--------|---------|-------------------------|-----------|------|------|------|
|        |         | Sevuparin/DF02+ Malanil | screening | 30.6 | 11.3 | 0.98 |
|        |         | Sevuparin/DF02+ Malanil | pre-dose  | 30.6 | 11.3 | 0.98 |
|        |         | Sevuparin/DF02+ Malanil | D1H2      | 40.2 | 11.7 | 1.02 |
|        |         | Sevuparin/DF02+ Malanil | D1H5      | 30.6 | 11.7 | 1.02 |
|        |         | Sevuparin/DF02+ Malanil | D1H11     | 31.8 | 11.2 | 0.97 |
|        |         | Sevuparin/DF02+ Malanil | D1H17     | 32.8 | 11   | 0.96 |
|        |         | Sevuparin/DF02+ Malanil | D1H23     | 30.3 | 10.6 | 0.92 |
|        |         | Sevuparin/DF02+ Malanil | D2H29     | 33   | 11.4 | 0.99 |
|        |         | Sevuparin/DF02+ Malanil | D2H32     | 45.7 | 11.2 | 0.97 |
|        |         | Sevuparin/DF02+ Malanil | D2H35     | 31.6 | 10.3 | 0.9  |
|        |         | Sevuparin/DF02+ Malanil | D2H41     | 36.3 | 10.1 | 0.88 |
|        |         | Sevuparin/DF02+ Malanil | D2H47     | 34.3 | 11.6 | 1.01 |
|        |         | Sevuparin/DF02+ Malanil | D3H53     | 33.2 | 11.8 | 1.03 |
|        |         | Sevuparin/DF02+ Malanil | D3H59     | 37.4 | 13.5 | 1.17 |
|        |         | Sevuparin/DF02+ Malanil | D3H65     | 33.6 | 11.7 | 1.02 |
|        |         | Sevuparin/DF02+ Malanil | D3H68     | 40.9 | 11.6 | 1.01 |
|        |         | Sevuparin/DF02+ Malanil | D3H71     | 33.5 | 11.3 | 0.98 |
|        |         | Sevuparin/DF02+ Malanil | D7        | 25.8 | 11.6 | 1.01 |
|        |         | Sevuparin/DF02+ Malanil | D14       | 27.5 | 11.6 | 1.01 |
|        |         | Sevuparin/DF02+ Malanil | screening | 31.2 | 14.9 | 1.3  |
|        |         | Sevuparin/DF02+ Malanil | pre-dose  | 31.2 | 14.9 | 1.3  |

## TSM02 Individual subject listings part 2

## CSR Appendix 16.2

| SUBJID | INITIAL | ARM                     | TIMEPOINT | APTT | PT   | INR  |
|--------|---------|-------------------------|-----------|------|------|------|
|        |         | Sevuparin/DF02+ Malanil | D1H2      | 48   | 16.3 | 1.42 |
|        |         | Sevuparin/DF02+ Malanil | D1H5      | 34.1 | 13.9 | 1.21 |
|        |         | Sevuparin/DF02+ Malanil | D1H11     | 38.4 | 15.2 | 1.32 |
|        |         | Sevuparin/DF02+ Malanil | D1H17     | 38.2 | 13.9 | 1.21 |
|        |         | Sevuparin/DF02+ Malanil | D1H23     | 40.6 | 13.5 | 1.17 |
|        |         | Sevuparin/DF02+ Malanil | D2H29     | 39.6 | 13.6 | 1.18 |
|        |         | Sevuparin/DF02+ Malanil | D2H32     | 48.7 | 14.4 | 1.25 |
|        |         | Sevuparin/DF02+ Malanil | D2H35     | 41.1 | 14.2 | 1.23 |
|        |         | Sevuparin/DF02+ Malanil | D2H41     | 41.4 | 14.2 | 1.23 |
|        |         | Sevuparin/DF02+ Malanil | D2H47     | 35.7 | 13.8 | 1.2  |
|        |         | Sevuparin/DF02+ Malanil | D3H53     | 39.5 | 14.3 | 1.24 |
|        |         | Sevuparin/DF02+ Malanil | D3H59     | 39.5 | 13.9 | 1.21 |
|        |         | Sevuparin/DF02+ Malanil | D3H65     | 35.2 | 14.4 | 1.25 |
|        |         | Sevuparin/DF02+ Malanil | D3H68     | 45.8 | 14.1 | 1.23 |
|        |         | Sevuparin/DF02+ Malanil | D3H71     | 39.3 | 13.7 | 1.19 |
|        |         | Sevuparin/DF02+ Malanil | D7        | 30.4 | 15   | 1.3  |
|        |         | Sevuparin/DF02+ Malanil | D14       | 29.8 | 13.1 | 1.14 |
|        |         | Sevuparin/DF02+ Malanil | screening | 28.5 | 13.2 | 1.15 |
|        |         | Sevuparin/DF02+ Malanil | pre-dose  | 28.5 | 13.2 | 1.15 |
|        |         | Sevuparin/DF02+ Malanil | D1H2      | 37.9 | 13.6 | 1.18 |
|        |         | Sevuparin/DF02+ Malanil | D1H5      | 30.3 | 14.7 | 1.28 |
|        |         | Sevuparin/DF02+ Malanil | D1H11     | 31.8 | 13.5 | 1.17 |
|        |         | Sevuparin/DF02+ Malanil | D1H17     | 28.6 | 12.1 | 1.05 |

## TSM02 Individual subject listings part 2

## CSR Appendix 16.2

| SUBJID | INITIAL | ARM                     | TIMEPOINT | APTT | PT   | INR  |
|--------|---------|-------------------------|-----------|------|------|------|
|        |         | Sevuparin/DF02+ Malanil | D1H23     | 35   | 11.4 | 0.99 |
|        |         | Sevuparin/DF02+ Malanil | D2H29     | 29.5 | 13.3 | 1.16 |
|        |         | Sevuparin/DF02+ Malanil | D2H32     | 43.5 | 11.9 | 1.03 |
|        |         | Sevuparin/DF02+ Malanil | D2H35     | 29.6 | 12.7 | 1.1  |
|        |         | Sevuparin/DF02+ Malanil | D2H41     | 29.6 | 12   | 1.04 |
|        |         | Sevuparin/DF02+ Malanil | D2H47     | 30.2 | 12.7 | 1.1  |
|        |         | Sevuparin/DF02+ Malanil | D3H53     | 27.3 | 13.6 | 1.18 |
|        |         | Sevuparin/DF02+ Malanil | D3H59     | 32.9 | 13.4 | 1.17 |
|        |         | Sevuparin/DF02+ Malanil | D3H65     | 34.4 | 13.1 | 1.14 |
|        |         | Sevuparin/DF02+ Malanil | D3H68     | 42.9 | 14.3 | 1.24 |
|        |         | Sevuparin/DF02+ Malanil | D3H71     | 29.1 | 11.8 | 1.03 |
|        |         | Sevuparin/DF02+ Malanil | D7        | 28.7 | 12.9 | 1.12 |
|        |         | Sevuparin/DF02+ Malanil | D14       | 25.9 | 10.9 | 0.91 |
|        |         | Sevuparin/DF02+ Malanil | screening | 28.8 | 12.6 | 1.05 |
|        |         | Sevuparin/DF02+ Malanil | pre-dose  | 28.8 | 12.6 | 1.05 |
|        |         | Sevuparin/DF02+ Malanil | D1H2      | 42.5 | 13.5 | 1.13 |
|        |         | Sevuparin/DF02+ Malanil | D1H5      | 33.5 | 13.9 | 1.16 |
|        |         | Sevuparin/DF02+ Malanil | D1H11     | 38.6 | 15.3 | 1.26 |
|        |         | Sevuparin/DF02+ Malanil | D1H17     | 41.4 | 14.8 | 1.22 |
|        |         | Sevuparin/DF02+ Malanil | D1H23     | 49.4 | 14.8 | 1.22 |
|        |         | Sevuparin/DF02+ Malanil | D2H29     | 48   | 14.6 | 1.22 |
|        |         | Sevuparin/DF02+ Malanil | D2H32     | 70.7 | 16.2 | 1.34 |
|        |         | Sevuparin/DF02+ Malanil | D2H35     | 53.4 | 13.4 | 1.12 |

## TSM02 Individual subject listings part 2

## CSR Appendix 16.2

| SUBJID | INITIAL | ARM                     | TIMEPOINT | APTT | PT   | INR  |
|--------|---------|-------------------------|-----------|------|------|------|
|        |         | Sevuparin/DF02+ Malanil | D2H41     | 50.3 | 15.3 | 1.26 |
|        |         | Sevuparin/DF02+ Malanil | D2H47     | 48.3 | 13.8 | 1.15 |
|        |         | Sevuparin/DF02+ Malanil | D3H53     | 41.5 | 14.5 | 1.21 |
|        |         | Sevuparin/DF02+ Malanil | D3H59     | 45.1 | 13.4 | 1.12 |
|        |         | Sevuparin/DF02+ Malanil | D3H65     | 45.6 | 14   | 1.17 |
|        |         | Sevuparin/DF02+ Malanil | D3H68     | 68.5 | 14.2 | 1.18 |
|        |         | Sevuparin/DF02+ Malanil | D3H71     | 43.4 | 13.7 | 1.14 |
|        |         | Sevuparin/DF02+ Malanil | D7        | 26.9 | 12.5 | 1.04 |
|        |         | Sevuparin/DF02+ Malanil | D14       | 27   | 13.2 | 1.1  |
|        |         | Sevuparin/DF02+ Malanil | screening | 30.7 | 12.9 | 1.08 |
|        |         | Sevuparin/DF02+ Malanil | pre-dose  | 30.7 | 12.9 | 1.08 |
|        |         | Sevuparin/DF02+ Malanil | D1H2      | 35   | 13.6 | 1.13 |
|        |         | Sevuparin/DF02+ Malanil | D1H5      | 30.2 | 14.8 | 1.22 |
|        |         | Sevuparin/DF02+ Malanil | D1H11     | 36.2 | 15   | 1.24 |
|        |         | Sevuparin/DF02+ Malanil | D1H17     | 32.4 | 12.6 | 1.05 |
|        |         | Sevuparin/DF02+ Malanil | D1H23     | 33.7 | 14.3 | 1.19 |
|        |         | Sevuparin/DF02+ Malanil | D2H29     | 33.1 | 12.7 | 1.06 |
|        |         | Sevuparin/DF02+ Malanil | D2H32     | 52.2 | 13.7 | 1.14 |
|        |         | Sevuparin/DF02+ Malanil | D2H35     | 36.4 | 13.4 | 1.12 |
|        |         | Sevuparin/DF02+ Malanil | D2H41     | 34.9 | 12.7 | 1.06 |
|        |         | Sevuparin/DF02+ Malanil | D2H47     | 33.8 | 12.9 | 1.08 |
|        |         | Sevuparin/DF02+ Malanil | D3H53     | 34   | 12.3 | 1.02 |
|        |         | Sevuparin/DF02+ Malanil | D3H59     | 34.2 | 13   | 1.08 |

## TSM02 Individual subject listings part 2

## CSR Appendix 16.2

| <b>SUBJID</b> | <b>INITIAL</b> | <b>ARM</b>              | <b>TIMEPOINT</b> | <b>APTT</b> | <b>PT</b> | <b>INR</b> |
|---------------|----------------|-------------------------|------------------|-------------|-----------|------------|
|               |                | Sevuparin/DF02+ Malanil | D3H65            | 32.6        | 12.1      | 1.01       |
|               |                | Sevuparin/DF02+ Malanil | D3H68            | 42          | 13.2      | 1.1        |
|               |                | Sevuparin/DF02+ Malanil | D3H71            | 31          | 12.4      | 1.03       |
|               |                | Sevuparin/DF02+ Malanil | D7               | 27.8        | 13.3      | 1.11       |
|               |                | Sevuparin/DF02+ Malanil | D14              | 27.6        | 12.9      | 1.08       |
|               |                | Sevuparin/DF02+ Malanil | screening        | 29.9        | 13.1      | 1.09       |
|               |                | Sevuparin/DF02+ Malanil | pre-dose         | 29.9        | 13.1      | 1.09       |
|               |                | Sevuparin/DF02+ Malanil | D1H2             | 40.6        | 11.7      | 0.98       |
|               |                | Sevuparin/DF02+ Malanil | D1H5             | 33.9        | 13.5      | 1.13       |
|               |                | Sevuparin/DF02+ Malanil | D1H11            | 41.6        | 14.1      | 1.18       |
|               |                | Sevuparin/DF02+ Malanil | D1H17            | 33.2        | 12.2      | 1.02       |
|               |                | Sevuparin/DF02+ Malanil | D1H23            | 38.8        | 12.8      | 1.07       |
|               |                | Sevuparin/DF02+ Malanil | D2H29            | 35          | 12.8      | 1.07       |
|               |                | Sevuparin/DF02+ Malanil | D2H32            | 65.7        | 12.3      | 1.02       |
|               |                | Sevuparin/DF02+ Malanil | D2H35            | 38.5        | 13.2      | 1.1        |
|               |                | Sevuparin/DF02+ Malanil | D2H41            | 32.2        | 12.3      | 1.02       |
|               |                | Sevuparin/DF02+ Malanil | D2H47            | 34          | 11.9      | 0.99       |
|               |                | Sevuparin/DF02+ Malanil | D3H53            | 38.2        | 14        | 1.17       |
|               |                | Sevuparin/DF02+ Malanil | D3H59            | 33.8        | 13        | 1.08       |
|               |                | Sevuparin/DF02+ Malanil | D3H65            | 32.1        | 11.6      | 0.97       |
|               |                | Sevuparin/DF02+ Malanil | D3H68            | 44.2        | 11.9      | 0.99       |
|               |                | Sevuparin/DF02+ Malanil | D3H71            | 39.2        | 13.8      | 1.15       |
|               |                | Sevuparin/DF02+ Malanil | D7               | 25.8        | 14.3      | 1.19       |

## TSM02 Individual subject listings part 2

## CSR Appendix 16.2

| <b>SUBJID</b> | <b>INITIAL</b> | <b>ARM</b>              | <b>TIMEPOINT</b> | <b>APTT</b> | <b>PT</b> | <b>INR</b> |
|---------------|----------------|-------------------------|------------------|-------------|-----------|------------|
|               |                | Sevuparin/DF02+ Malanil | screening        | 28          | 13.2      | 1.1        |
|               |                | Sevuparin/DF02+ Malanil | pre-dose         | 28          | 13.2      | 1.1        |
|               |                | Sevuparin/DF02+ Malanil | D1H2             | 38.9        | 13.3      | 1.11       |
|               |                | Sevuparin/DF02+ Malanil | D1H5             | 30.1        | 13.6      | 1.13       |
|               |                | Sevuparin/DF02+ Malanil | D1H11            | 35.2        | 16.1      | 1.33       |
|               |                | Sevuparin/DF02+ Malanil | D1H17            | 42.4        | 17.4      | 1.44       |
|               |                | Sevuparin/DF02+ Malanil | D1H23            | 44.4        | 17.5      | 1.45       |
|               |                | Sevuparin/DF02+ Malanil | D2H29            | 41.9        | 17        | 1.41       |
|               |                | Sevuparin/DF02+ Malanil | D2H32            | 78.5        | 21.4      | 1.76       |
|               |                | Sevuparin/DF02+ Malanil | D2H35            | 44.1        | 17.1      | 1.42       |
|               |                | Sevuparin/DF02+ Malanil | D2H41            | 43          | 17.2      | 1.42       |
|               |                | Sevuparin/DF02+ Malanil | D2H47            | 40.8        | 14.6      | 1.22       |
|               |                | Sevuparin/DF02+ Malanil | D3H53            | 42.3        | 16.6      | 1.37       |
|               |                | Sevuparin/DF02+ Malanil | D3H59            | 41.2        | 16.3      | 1.35       |
|               |                | Sevuparin/DF02+ Malanil | D3H65            | 39.3        | 14        | 1.17       |
|               |                | Sevuparin/DF02+ Malanil | D3H68            | 54          | 14.8      | 1.22       |
|               |                | Sevuparin/DF02+ Malanil | D3H71            | 39.4        | 15.3      | 1.26       |
|               |                | Sevuparin/DF02+ Malanil | D7               | 28.3        | 13.4      | 1.12       |
|               |                | Sevuparin/DF02+ Malanil | D14              | 28.8        | 14.2      | 1.18       |
|               |                | Sevuparin/DF02+ Malanil | screening        | 26.3        | 12.1      | 1.01       |
|               |                | Sevuparin/DF02+ Malanil | pre-dose         | 26.3        | 12.1      | 1.01       |
|               |                | Sevuparin/DF02+ Malanil | D1H2             | 49.1        | 13.9      | 1.16       |
|               |                | Sevuparin/DF02+ Malanil | D1H5             | 31.2        | 13.3      | 1.11       |

## TSM02 Individual subject listings part 2

## CSR Appendix 16.2

| SUBJID | INITIAL | ARM                     | TIMEPOINT | APTT | PT   | INR  |
|--------|---------|-------------------------|-----------|------|------|------|
|        |         | Sevuparin/DF02+ Malanil | D1H11     | 30.1 | 14.4 | 1.2  |
|        |         | Sevuparin/DF02+ Malanil | D1H17     | 36.5 | 13.5 | 1.13 |
|        |         | Sevuparin/DF02+ Malanil | D1H23     | 26.2 | 13   | 1.08 |
|        |         | Sevuparin/DF02+ Malanil | D2H29     | 38.5 | 13.2 | 1.1  |
|        |         | Sevuparin/DF02+ Malanil | D2H32     | 52   | 13.6 | 1.13 |
|        |         | Sevuparin/DF02+ Malanil | D2H35     | 36.7 | 13.9 | 1.16 |
|        |         | Sevuparin/DF02+ Malanil | D2H41     | 36.8 | 13.4 | 1.12 |
|        |         | Sevuparin/DF02+ Malanil | D2H47     | 39   | 12.6 | 1.05 |
|        |         | Sevuparin/DF02+ Malanil | D3H53     | 38.3 | 13.2 | 1.1  |
|        |         | Sevuparin/DF02+ Malanil | D3H59     | 36.1 | 13.2 | 1.1  |
|        |         | Sevuparin/DF02+ Malanil | D3H65     | 37.2 | 12.9 | 1.08 |
|        |         | Sevuparin/DF02+ Malanil | D3H68     | 53.2 | 13.5 | 1.13 |
|        |         | Sevuparin/DF02+ Malanil | D3H71     | 35.4 | 13.1 | 1.09 |
|        |         | Sevuparin/DF02+ Malanil | D7        | 25.9 | 11.8 | 0.98 |
|        |         | Sevuparin/DF02+ Malanil | D14       | 25.5 | 10.8 | 0.9  |
|        |         | Sevuparin/DF02+ Malanil | screening | 24.1 | 11.8 | 0.98 |
|        |         | Sevuparin/DF02+ Malanil | pre-dose  | 24.1 | 11.8 | 0.98 |
|        |         | Sevuparin/DF02+ Malanil | D1H2      | 68.9 | 16.3 | 1.35 |
|        |         | Sevuparin/DF02+ Malanil | D1H5      | 38.5 | 14   | 1.17 |
|        |         | Sevuparin/DF02+ Malanil | D1H11     | 45.5 | 15.9 | 1.32 |
|        |         | Sevuparin/DF02+ Malanil | D1H17     | 47.1 | 16.1 | 1.33 |
|        |         | Sevuparin/DF02+ Malanil | D1H23     | 46.3 | 14.2 | 1.18 |
|        |         | Sevuparin/DF02+ Malanil | D2H29     | 45.4 | 14   | 1.17 |

## TSM02 Individual subject listings part 2

## CSR Appendix 16.2

| <b>SUBJID</b> | <b>INITIAL</b> | <b>ARM</b>              | <b>TIMEPOINT</b> | <b>APTT</b> | <b>PT</b> | <b>INR</b> |
|---------------|----------------|-------------------------|------------------|-------------|-----------|------------|
|               |                | Sevuparin/DF02+ Malanil | D2H32            | 73.7        | 16.9      | 1.4        |
|               |                | Sevuparin/DF02+ Malanil | D2H35            | 53.9        | 14.8      | 1.22       |
|               |                | Sevuparin/DF02+ Malanil | D2H41            | 48.3        | 15        | 1.24       |
|               |                | Sevuparin/DF02+ Malanil | D2H47            | 48.1        | 13.9      | 1.16       |
|               |                | Sevuparin/DF02+ Malanil | D3H53            | 47.1        | 14.6      | 1.22       |
|               |                | Sevuparin/DF02+ Malanil | D3H59            | 53.7        | 14.6      | 1.22       |
|               |                | Sevuparin/DF02+ Malanil | D3H65            | 57.5        | 14        | 1.17       |
|               |                | Sevuparin/DF02+ Malanil | D3H68            | 71.6        | 14.9      | 1.23       |
|               |                | Sevuparin/DF02+ Malanil | D3H71            | 51.9        | 13.4      | 1.12       |
|               |                | Sevuparin/DF02+ Malanil | D7               | 27.5        | 10.8      | 0.9        |
|               |                | Sevuparin/DF02+ Malanil | D14              | 25.6        | 13.9      | 1.16       |
|               |                | Sevuparin/DF02+ Malanil | screening        | 27.8        | 14.6      | 1.22       |
|               |                | Sevuparin/DF02+ Malanil | pre-dose         | 27.8        | 14.6      | 1.22       |
|               |                | Sevuparin/DF02+ Malanil | D1H2             | 50.4        | 17.7      | 1.47       |
|               |                | Sevuparin/DF02+ Malanil | D1H5             | 33.8        | 16.4      | 1.36       |
|               |                | Sevuparin/DF02+ Malanil | D1H11            | 37          | 17.6      | 1.46       |
|               |                | Sevuparin/DF02+ Malanil | D1H17            | 37.1        | 16        | 1.32       |
|               |                | Sevuparin/DF02+ Malanil | D1H23            | 37.9        | 18        | 1.49       |
|               |                | Sevuparin/DF02+ Malanil | D2H29            | 36.6        | 14.6      | 1.22       |
|               |                | Sevuparin/DF02+ Malanil | D2H32            | 52.2        | 15.4      | 1.27       |
|               |                | Sevuparin/DF02+ Malanil | D2H35            | 38.2        | 16.8      | 1.39       |
|               |                | Sevuparin/DF02+ Malanil | D2H41            | 34          | 14.9      | 1.23       |
|               |                | Sevuparin/DF02+ Malanil | D2H47            | 34.5        | 14.1      | 1.18       |



## TSM02 Individual subject listings part 2

## CSR Appendix 16.2

| <b>SUBJID</b> | <b>INITIAL</b> | <b>ARM</b>              | <b>TIMEPOINT</b> | <b>APTT</b> | <b>PT</b> | <b>INR</b> |
|---------------|----------------|-------------------------|------------------|-------------|-----------|------------|
|               |                | Sevuparin/DF02+ Malanil | D3H53            | 28.2        | 13.1      | 1.09       |
|               |                | Sevuparin/DF02+ Malanil | D3H59            | 35.2        | 14.6      | 1.22       |
|               |                | Sevuparin/DF02+ Malanil | D3H65            | 34.3        | 14.9      | 1.23       |
|               |                | Sevuparin/DF02+ Malanil | D3H68            | 48.7        | 14.2      | 1.18       |
|               |                | Sevuparin/DF02+ Malanil | D3H71            | 32.7        | 14.6      | 1.22       |
|               |                | Sevuparin/DF02+ Malanil | D7               | 25.7        | 13.8      | 1.15       |
|               |                | Sevuparin/DF02+ Malanil | D14              | 24.5        | 13.6      | 1.13       |
|               |                | Sevuparin/DF02+ Malanil | screening        | 29.5        | 12.4      | 1.03       |
|               |                | Sevuparin/DF02+ Malanil | pre-dose         | 29.5        | 12.4      | 1.03       |
|               |                | Sevuparin/DF02+ Malanil | D1H2             | 43.8        | 14.5      | 1.21       |
|               |                | Sevuparin/DF02+ Malanil | D1H5             | 34.4        | 13.2      | 1.1        |
|               |                | Sevuparin/DF02+ Malanil | D1H11            | 38.3        | 17.6      | 1.42       |
|               |                | Sevuparin/DF02+ Malanil | D1H17            | 51.4        | 17.4      | 1.44       |
|               |                | Sevuparin/DF02+ Malanil | D1H23            | 35.2        | 12.7      | 1.06       |
|               |                | Sevuparin/DF02+ Malanil | D2H29            | 33.3        | 12.3      | 1.02       |
|               |                | Sevuparin/DF02+ Malanil | D2H32            | 40.7        | 15.3      | 1.26       |
|               |                | Sevuparin/DF02+ Malanil | D2H35            | 35.4        | 12.9      | 1.08       |
|               |                | Sevuparin/DF02+ Malanil | D2H41            | 37          | 12.9      | 1.08       |
|               |                | Sevuparin/DF02+ Malanil | D2H47            | 35          | 11.7      | 0.98       |
|               |                | Sevuparin/DF02+ Malanil | D3H53            | 44.9        | 16.7      | 1.38       |
|               |                | Sevuparin/DF02+ Malanil | D3H59            | 38.2        | 13.6      | 1.13       |
|               |                | Sevuparin/DF02+ Malanil | D3H65            | 37.1        | 13.6      | 1.13       |
|               |                | Sevuparin/DF02+ Malanil | D3H68            | 45.6        | 14.8      | 1.22       |

## TSM02 Individual subject listings part 2

## CSR Appendix 16.2

| <b>SUBJID</b> | <b>INITIAL</b> | <b>ARM</b>              | <b>TIMEPOINT</b> | <b>APTT</b> | <b>PT</b> | <b>INR</b> |
|---------------|----------------|-------------------------|------------------|-------------|-----------|------------|
|               |                | Sevuparin/DF02+ Malanil | D3H71            | 33.7        | 13.3      | 1.11       |
|               |                | Sevuparin/DF02+ Malanil | D7               | 26.8        | 12.5      | 1.04       |
|               |                | Sevuparin/DF02+ Malanil | D14              | 26.4        | 11.2      | 0.93       |
|               |                | Sevuparin/DF02+ Malanil | screening        | 30          | 11.5      | 0.96       |
|               |                | Sevuparin/DF02+ Malanil | pre-dose         | 30          | 11.5      | 0.96       |
|               |                | Sevuparin/DF02+ Malanil | D1H2             | 41.3        | 12.4      | 1.03       |
|               |                | Sevuparin/DF02+ Malanil | D1H5             | 29.9        | 11.9      | 0.99       |
|               |                | Sevuparin/DF02+ Malanil | D1H11            | 33.8        | 12.1      | 1.01       |
|               |                | Sevuparin/DF02+ Malanil | D1H17            | 32.1        | 12        | 1          |
|               |                | Sevuparin/DF02+ Malanil | D1H23            | 29.7        | 11.5      | 0.96       |
|               |                | Sevuparin/DF02+ Malanil | D2H29            | 29.3        | 12.4      | 1.03       |
|               |                | Sevuparin/DF02+ Malanil | D2H32            | 46.1        | 12.3      | 1.02       |
|               |                | Sevuparin/DF02+ Malanil | D2H35            | 33.3        | 11.6      | 0.97       |
|               |                | Sevuparin/DF02+ Malanil | D2H41            | 31.6        | 12.1      | 1.01       |
|               |                | Sevuparin/DF02+ Malanil | D2H47            | 30.3        | 11.7      | 0.98       |
|               |                | Sevuparin/DF02+ Malanil | D3H53            | 34.7        | 12.7      | 1.06       |
|               |                | Sevuparin/DF02+ Malanil | D3H59            | 29.5        | 13.2      | 1.1        |
|               |                | Sevuparin/DF02+ Malanil | D3H65            | 30.1        | 12.2      | 1.02       |
|               |                | Sevuparin/DF02+ Malanil | D3H68            | 26          | 11.1      | 0.93       |
|               |                | Sevuparin/DF02+ Malanil | D3H71            | 27.1        | 10.8      | 0.9        |
|               |                | Sevuparin/DF02+ Malanil | D7               | 27.4        | 11.5      | 0.96       |
|               |                | Sevuparin/DF02+ Malanil | D14              | 27.6        | 11        | 0.92       |
|               |                | Sevuparin/DF02+ Malanil | screening        | 22.4        | 11.7      | 0.98       |

## TSM02 Individual subject listings part 2

## CSR Appendix 16.2

| <b>SUBJID</b> | <b>INITIAL</b> | <b>ARM</b>              | <b>TIMEPOINT</b> | <b>APTT</b> | <b>PT</b> | <b>INR</b> |
|---------------|----------------|-------------------------|------------------|-------------|-----------|------------|
|               |                | Sevuparin/DF02+ Malanil | pre-dose         | 22.4        | 11.7      | 0.98       |
|               |                | Sevuparin/DF02+ Malanil | D1H2             | 39.4        | 16        | 1.32       |
|               |                | Sevuparin/DF02+ Malanil | D1H5             | 32.7        | 15.5      | 1.28       |
|               |                | Sevuparin/DF02+ Malanil | D1H11            | 42.1        | 17.6      | 1.46       |
|               |                | Sevuparin/DF02+ Malanil | D1H17            | 30.5        | 13.6      | 1.13       |
|               |                | Sevuparin/DF02+ Malanil | D1H23            | 30.3        | 12.6      | 1.05       |
|               |                | Sevuparin/DF02+ Malanil | D2H29            | 31.1        | 13.4      | 1.12       |
|               |                | Sevuparin/DF02+ Malanil | D2H32            | 49.6        | 15.8      | 1.31       |
|               |                | Sevuparin/DF02+ Malanil | D2H35            | 42.9        | 17.1      | 1.42       |
|               |                | Sevuparin/DF02+ Malanil | D2H41            | 34.8        | 14.6      | 1.22       |
|               |                | Sevuparin/DF02+ Malanil | D2H47            | 38.1        | 13        | 1.08       |
|               |                | Sevuparin/DF02+ Malanil | D3H53            | 39.4        | 15.5      | 1.28       |
|               |                | Sevuparin/DF02+ Malanil | D3H59            | 36.8        | 13.9      | 1.16       |
|               |                | Sevuparin/DF02+ Malanil | D3H65            | 41.7        | 15.2      | 1.26       |
|               |                | Sevuparin/DF02+ Malanil | D3H68            | 50.3        | 14.2      | 1.18       |
|               |                | Sevuparin/DF02+ Malanil | D3H71            | 37.8        | 13.1      | 1.09       |
|               |                | Sevuparin/DF02+ Malanil | D7               | 27.6        | 11.9      | 0.99       |
|               |                | Sevuparin/DF02+ Malanil | D14              | 26          | 12.2      | 1.02       |
|               |                | Sevuparin/DF02+ Malanil | screening        | 30.3        | 12.8      | 1.07       |
|               |                | Sevuparin/DF02+ Malanil | pre-dose         | 30.3        | 12.8      | 1.07       |
|               |                | Sevuparin/DF02+ Malanil | D1H2             | 37          | 14.6      | 1.22       |
|               |                | Sevuparin/DF02+ Malanil | D1H5             | 32.8        | 14.6      | 1.22       |
|               |                | Sevuparin/DF02+ Malanil | D1H11            | 34.1        | 13.8      | 1.15       |

## TSM02 Individual subject listings part 2

## CSR Appendix 16.2

| SUBJID | INITIAL | ARM                     | TIMEPOINT | APTT | PT   | INR  |
|--------|---------|-------------------------|-----------|------|------|------|
|        |         | Sevuparin/DF02+ Malanil | D1H17     | 36.8 | 15.1 | 1.25 |
|        |         | Sevuparin/DF02+ Malanil | D1H23     | 34.5 | 15.5 | 1.28 |
|        |         | Sevuparin/DF02+ Malanil | D2H29     | 38.9 | 15.8 | 1.31 |
|        |         | Sevuparin/DF02+ Malanil | D2H32     | 56.9 | 17.2 | 1.42 |
|        |         | Sevuparin/DF02+ Malanil | D2H35     | 44.1 | 16.2 | 1.34 |
|        |         | Sevuparin/DF02+ Malanil | D2H41     | 40.9 | 16.2 | 1.34 |
|        |         | Sevuparin/DF02+ Malanil | D2H47     | 36.2 | 14.3 | 1.19 |
|        |         | Sevuparin/DF02+ Malanil | D3H53     | 35.9 | 14.5 | 1.21 |
|        |         | Sevuparin/DF02+ Malanil | D3H59     | 40   | 14.7 | 1.22 |
|        |         | Sevuparin/DF02+ Malanil | D3H65     | 41.2 | 15.9 | 1.32 |
|        |         | Sevuparin/DF02+ Malanil | D3H68     | 44.6 | 13.2 | 1.1  |
|        |         | Sevuparin/DF02+ Malanil | D3H71     | 35.7 | 13.6 | 1.13 |
|        |         | Sevuparin/DF02+ Malanil | D7        | 27   | 13.2 | 1.1  |
|        |         | Sevuparin/DF02+ Malanil | D14       | 25.8 | 12.4 | 1.03 |
|        |         | Sevuparin/DF02+ Malanil | screening | 28.5 | 13.6 | 1.13 |
|        |         | Sevuparin/DF02+ Malanil | pre-dose  | 28.5 | 13.6 | 1.13 |
|        |         | Sevuparin/DF02+ Malanil | D1H2      | 39.6 | 14.1 | 1.18 |
|        |         | Sevuparin/DF02+ Malanil | D1H5      | 29.3 | 13.5 | 1.13 |
|        |         | Sevuparin/DF02+ Malanil | D1H11     | 30.6 | 13.9 | 1.16 |
|        |         | Sevuparin/DF02+ Malanil | D1H17     | 32.2 | 13.9 | 1.16 |
|        |         | Sevuparin/DF02+ Malanil | D1H23     | 30.6 | 14.3 | 1.19 |
|        |         | Sevuparin/DF02+ Malanil | D2H29     | 33.3 | 13.8 | 1.15 |
|        |         | Sevuparin/DF02+ Malanil | D2H32     | 41.1 | 13   | 1.08 |

## TSM02 Individual subject listings part 2

## CSR Appendix 16.2

| <b>SUBJID</b> | <b>INITIAL</b> | <b>ARM</b>              | <b>TIMEPOINT</b> | <b>APTT</b> | <b>PT</b> | <b>INR</b> |
|---------------|----------------|-------------------------|------------------|-------------|-----------|------------|
|               |                | Sevuparin/DF02+ Malanil | D2H35            | 33.1        | 14.1      | 1.18       |
|               |                | Sevuparin/DF02+ Malanil | D2H41            | 33.6        | 13.5      | 1.13       |
|               |                | Sevuparin/DF02+ Malanil | D2H47            | 32.8        | 13.8      | 1.15       |
|               |                | Sevuparin/DF02+ Malanil | D3H53            | 36.4        | 15.6      | 1.29       |
|               |                | Sevuparin/DF02+ Malanil | D3H59            | 34.3        | 14.1      | 1.18       |
|               |                | Sevuparin/DF02+ Malanil | D3H65            | 35.6        | 14        | 1.17       |
|               |                | Sevuparin/DF02+ Malanil | D3H68            | 46.7        | 14        | 1.17       |
|               |                | Sevuparin/DF02+ Malanil | D3H71            | 36.9        | 13.9      | 1.16       |
|               |                | Sevuparin/DF02+ Malanil | D7               | 30.1        | 13.7      | 1.14       |
|               |                | Sevuparin/DF02+ Malanil | D14              | 28.8        | 12.8      | 1.07       |
|               |                | Sevuparin/DF02+ Malanil | screening        | 29.3        | 15.5      | 1.28       |
|               |                | Sevuparin/DF02+ Malanil | pre-dose         | 29.3        | 15.5      | 1.28       |
|               |                | Sevuparin/DF02+ Malanil | D1H2             | 48          | 16.5      | 1.37       |
|               |                | Sevuparin/DF02+ Malanil | D1H5             | 35.2        | 16.9      | 1.4        |
|               |                | Sevuparin/DF02+ Malanil | D1H11            | 37.1        | 18.7      | 1.55       |
|               |                | Sevuparin/DF02+ Malanil | D1H17            | 43          | 18.2      | 1.51       |
|               |                | Sevuparin/DF02+ Malanil | D1H23            | 47.1        | 17.2      | 1.42       |
|               |                | Sevuparin/DF02+ Malanil | D2H29            | 44.1        | 14.1      | 1.18       |
|               |                | Sevuparin/DF02+ Malanil | D2H32            | 72.4        | 16.1      | 1.33       |
|               |                | Sevuparin/DF02+ Malanil | D2H35            | 52.2        | 16.1      | 1.33       |
|               |                | Sevuparin/DF02+ Malanil | D2H41            | 46.5        | 14.1      | 1.18       |
|               |                | Sevuparin/DF02+ Malanil | D2H47            | 44.8        | 13.2      | 1.1        |
|               |                | Sevuparin/DF02+ Malanil | D3H53            | 40          | 13.4      | 1.12       |

## TSM02 Individual subject listings part 2

## CSR Appendix 16.2

| SUBJID | INITIAL | ARM                     | TIMEPOINT | APTT | PT   | INR  |
|--------|---------|-------------------------|-----------|------|------|------|
|        |         | Sevuparin/DF02+ Malanil | D3H59     | 47   | 14.5 | 1.21 |
|        |         | Sevuparin/DF02+ Malanil | D3H65     | 43   | 14.1 | 1.18 |
|        |         | Sevuparin/DF02+ Malanil | D3H68     | 55.8 | 13.2 | 1.1  |
|        |         | Sevuparin/DF02+ Malanil | D3H71     | 39.5 | 13   | 1.08 |
|        |         | Sevuparin/DF02+ Malanil | D7        | 29.6 | 12.7 | 1.06 |
|        |         | Sevuparin/DF02+ Malanil | D14       | 29.4 | 13.6 | 1.13 |
|        |         | Sevuparin/DF02+ Malanil | screening | 38.8 | 14.7 | 1.22 |
|        |         | Sevuparin/DF02+ Malanil | pre-dose  | 38.8 | 14.7 | 1.22 |
|        |         | Sevuparin/DF02+ Malanil | D1H2      | 46.1 | 15.5 | 1.28 |
|        |         | Sevuparin/DF02+ Malanil | D1H5      | 35.1 | 15.1 | 1.25 |
|        |         | Sevuparin/DF02+ Malanil | D1H11     | 34.7 | 14.9 | 1.23 |
|        |         | Sevuparin/DF02+ Malanil | D1H17     | 35.7 | 14.5 | 1.21 |
|        |         | Sevuparin/DF02+ Malanil | D1H23     | 36.5 | 14.1 | 1.18 |
|        |         | Sevuparin/DF02+ Malanil | D2H29     | 39.1 | 14.9 | 1.23 |
|        |         | Sevuparin/DF02+ Malanil | D2H32     | 54.5 | 16.2 | 1.34 |
|        |         | Sevuparin/DF02+ Malanil | D2H35     | 49.4 | 16.1 | 1.33 |
|        |         | Sevuparin/DF02+ Malanil | D2H41     | 40.2 | 15.6 | 1.29 |
|        |         | Sevuparin/DF02+ Malanil | D2H47     | 44.6 | 17.2 | 1.42 |
|        |         | Sevuparin/DF02+ Malanil | D3H53     | 45.6 | 17.9 | 1.48 |
|        |         | Sevuparin/DF02+ Malanil | D3H59     | 42.5 | 16.2 | 1.34 |
|        |         | Sevuparin/DF02+ Malanil | D3H65     | 33.5 | 13.7 | 1.14 |
|        |         | Sevuparin/DF02+ Malanil | D3H68     | 49.1 | 15.2 | 1.26 |
|        |         | Sevuparin/DF02+ Malanil | D3H71     | 42   | 15.1 | 1.25 |

## TSM02 Individual subject listings part 2

## CSR Appendix 16.2

| <b>SUBJID</b> | <b>INITIAL</b> | <b>ARM</b>              | <b>TIMEPOINT</b> | <b>APTT</b> | <b>PT</b> | <b>INR</b> |
|---------------|----------------|-------------------------|------------------|-------------|-----------|------------|
|               |                | Sevuparin/DF02+ Malanil | D7               | 32.1        | 13.6      | 1.13       |
|               |                | Sevuparin/DF02+ Malanil | D14              | 31.9        | 14.6      | 1.22       |
|               |                | Sevuparin/DF02+ Malanil | screening        | 25.7        | 12.5      | 1.04       |
|               |                | Sevuparin/DF02+ Malanil | pre-dose         | 25.7        | 12.5      | 1.04       |
|               |                | Sevuparin/DF02+ Malanil | D1H2             | 32.1        | 12.3      | 1.02       |
|               |                | Sevuparin/DF02+ Malanil | D1H5             | 25.5        | 12.2      | 1.02       |
|               |                | Sevuparin/DF02+ Malanil | D1H11            | 28.7        | 12.8      | 1.07       |
|               |                | Sevuparin/DF02+ Malanil | D1H17            | 28.1        | 13.1      | 1.09       |
|               |                | Sevuparin/DF02+ Malanil | D1H23            | 30.9        | 13.9      | 1.16       |
|               |                | Sevuparin/DF02+ Malanil | D2H29            | 28.5        | 13.4      | 1.12       |
|               |                | Sevuparin/DF02+ Malanil | D2H32            | 41.5        | 12.8      | 1.07       |
|               |                | Sevuparin/DF02+ Malanil | D2H35            | 29.2        | 13.1      | 1.09       |
|               |                | Sevuparin/DF02+ Malanil | D2H41            | 28.7        | 13.3      | 1.11       |
|               |                | Sevuparin/DF02+ Malanil | D2H47            | 32.6        | 13.1      | 1.09       |
|               |                | Sevuparin/DF02+ Malanil | D3H53            | 32.3        | 14.5      | 1.21       |
|               |                | Sevuparin/DF02+ Malanil | D3H59            | 29.3        | 13.2      | 1.1        |
|               |                | Sevuparin/DF02+ Malanil | D3H65            | 28.6        | 13.8      | 1.15       |
|               |                | Sevuparin/DF02+ Malanil | D3H68            | 37.3        | 14.3      | 1.19       |
|               |                | Sevuparin/DF02+ Malanil | D3H71            | 28.8        | 13.6      | 1.13       |
|               |                | Sevuparin/DF02+ Malanil | D7               | 24.9        | 11.5      | 0.96       |
|               |                | Sevuparin/DF02+ Malanil | D14              | 24.6        | 11.7      | 0.98       |
|               |                | Sevuparin/DF02+ Malanil | screening        | 28.1        | 13.7      | 1.14       |
|               |                | Sevuparin/DF02+ Malanil | pre-dose         | 28.1        | 13.7      | 1.14       |

## TSM02 Individual subject listings part 2

## CSR Appendix 16.2

| SUBJID | INITIAL | ARM                     | TIMEPOINT | APTT | PT   | INR  |
|--------|---------|-------------------------|-----------|------|------|------|
|        |         | Sevuparin/DF02+ Malanil | D1H2      | 38.7 | 14.1 | 1.18 |
|        |         | Sevuparin/DF02+ Malanil | D1H5      | 30.5 | 13.8 | 1.15 |
|        |         | Sevuparin/DF02+ Malanil | D1H11     | 36.6 | 15.1 | 1.25 |
|        |         | Sevuparin/DF02+ Malanil | D1H17     | 28.5 | 12.6 | 1.05 |
|        |         | Sevuparin/DF02+ Malanil | D1H23     | 35.2 | 16.3 | 1.35 |
|        |         | Sevuparin/DF02+ Malanil | D2H29     | 32.5 | 14.3 | 1.19 |
|        |         | Sevuparin/DF02+ Malanil | D2H32     | 42.8 | 13.6 | 1.13 |
|        |         | Sevuparin/DF02+ Malanil | D2H35     | 31.5 | 13.7 | 1.14 |
|        |         | Sevuparin/DF02+ Malanil | D2H41     | 37.2 | 16.7 | 1.38 |
|        |         | Sevuparin/DF02+ Malanil | D2H47     | 35.9 | 14.1 | 1.18 |
|        |         | Sevuparin/DF02+ Malanil | D3H53     | 31.4 | 12.6 | 1.05 |
|        |         | Sevuparin/DF02+ Malanil | D3H59     | 34.2 | 13.9 | 1.16 |
|        |         | Sevuparin/DF02+ Malanil | D3H65     | 31.4 | 13.1 | 1.09 |
|        |         | Sevuparin/DF02+ Malanil | D3H68     | 52.6 | 13.6 | 1.13 |
|        |         | Sevuparin/DF02+ Malanil | D3H71     | 31.4 | 11.6 | 0.97 |
|        |         | Sevuparin/DF02+ Malanil | D7        | 24.7 | 11.3 | 0.94 |
|        |         | Sevuparin/DF02+ Malanil | D14       | 23.3 | 10.5 | 0.88 |
|        |         | Sevuparin/DF02+ Malanil | screening | 33.8 | 15.3 | 1.26 |
|        |         | Sevuparin/DF02+ Malanil | pre-dose  | 33.8 | 15.3 | 1.26 |
|        |         | Sevuparin/DF02+ Malanil | D1H2      | 49.1 | 15.1 | 1.25 |
|        |         | Sevuparin/DF02+ Malanil | D1H5      | 35.6 | 15.3 | 1.26 |
|        |         | Sevuparin/DF02+ Malanil | D1H11     | 39   | 15.6 | 1.29 |
|        |         | Sevuparin/DF02+ Malanil | D1H17     | 38.8 | 14.4 | 1.2  |



## TSM02 Individual subject listings part 2

## CSR Appendix 16.2

| SUBJID | INITIAL | ARM                     | TIMEPOINT | APTT | PT   | INR  |
|--------|---------|-------------------------|-----------|------|------|------|
|        |         | Sevuparin/DF02+ Malanil | D1H23     | 36.4 | 15.9 | 1.32 |
|        |         | Sevuparin/DF02+ Malanil | D2H29     | 38   | 14.9 | 1.23 |
|        |         | Sevuparin/DF02+ Malanil | D2H32     | 55.7 | 15.6 | 1.29 |
|        |         | Sevuparin/DF02+ Malanil | D2H35     | 40.4 | 14.2 | 1.18 |
|        |         | Sevuparin/DF02+ Malanil | D2H41     | 39.7 | 15.1 | 1.25 |
|        |         | Sevuparin/DF02+ Malanil | D2H47     | 33.5 | 13.8 | 1.15 |
|        |         | Sevuparin/DF02+ Malanil | D3H53     | 38.2 | 15.4 | 1.27 |
|        |         | Sevuparin/DF02+ Malanil | D3H59     | 34.6 | 13.6 | 1.13 |
|        |         | Sevuparin/DF02+ Malanil | D3H65     | 38.1 | 14.4 | 1.2  |
|        |         | Sevuparin/DF02+ Malanil | D3H68     | 35.5 | 14.7 | 1.22 |
|        |         | Sevuparin/DF02+ Malanil | D3H71     | 33.1 | 14.3 | 1.19 |
|        |         | Sevuparin/DF02+ Malanil | D7        | 29   | 15.5 | 1.28 |
|        |         | Sevuparin/DF02+ Malanil | D14       | 26.9 | 12.5 | 1.04 |
|        |         | Sevuparin/DF02+ Malanil | screening | 29.7 | 15.5 | 1.28 |
|        |         | Sevuparin/DF02+ Malanil | pre-dose  | 29.7 | 15.5 | 1.28 |
|        |         | Sevuparin/DF02+ Malanil | D1H2      | 37.5 | 13.9 | 1.16 |
|        |         | Sevuparin/DF02+ Malanil | D1H5      | 27.7 | 13.4 | 1.12 |
|        |         | Sevuparin/DF02+ Malanil | D1H11     | 28   | 13   | 1.08 |
|        |         | Sevuparin/DF02+ Malanil | D1H17     | 29.3 | 13   | 1.08 |
|        |         | Sevuparin/DF02+ Malanil | D1H23     | 28.7 | 13.5 | 1.13 |
|        |         | Sevuparin/DF02+ Malanil | D2H29     | 30.7 | 14.1 | 1.18 |
|        |         | Sevuparin/DF02+ Malanil | D2H32     | 43.5 | 14   | 1.17 |
|        |         | Sevuparin/DF02+ Malanil | D2H35     | 36.1 | 14.6 | 1.22 |

TSM02 Individual subject listings part 2

CSR Appendix 16.2

| <b>SUBJID</b> | <b>INITIAL</b> | <b>ARM</b>              | <b>TIMEPOINT</b> | <b>APTT</b> | <b>PT</b> | <b>INR</b> |
|---------------|----------------|-------------------------|------------------|-------------|-----------|------------|
|               |                | Sevuparin/DF02+ Malanil | D2H41            | 40          | 11.8      | 0.98       |
|               |                | Sevuparin/DF02+ Malanil | D2H47            | 29.1        | 12.4      | 1.03       |
|               |                | Sevuparin/DF02+ Malanil | D3H53            | 31.6        | 13.1      | 1.09       |
|               |                | Sevuparin/DF02+ Malanil | D3H59            | 31.9        | 12.6      | 1.05       |
|               |                | Sevuparin/DF02+ Malanil | D3H65            | 42          | 12.9      | 1.08       |
|               |                | Sevuparin/DF02+ Malanil | D3H68            | 47.5        | 13.6      | 1.13       |
|               |                | Sevuparin/DF02+ Malanil | D3H71            | 36.3        | 14.2      | 1.18       |
|               |                | Sevuparin/DF02+ Malanil | D7               | 28.2        | 12.9      | 1.08       |
|               |                | Sevuparin/DF02+ Malanil | D14              | 28.5        | 12.8      | 1.07       |

## TSM02 Individual subject listings part 2

## CSR Appendix 16.2

## 16.2.9 Concomitant medications

| SUBJID | INITIAL | ARM                        | CM SEQ | DRUGNAME                           | ATC TERM                              | ATC CODE | START DATE<br>TIME<br><i>99:99=UNK</i> | DUR<br>(days) | DOSE | UNIT | ROUTE | FREQ | INDICATION                                      |
|--------|---------|----------------------------|--------|------------------------------------|---------------------------------------|----------|----------------------------------------|---------------|------|------|-------|------|-------------------------------------------------|
|        |         | Sevuparin/DF02+<br>Malanil | 1      | ALB                                | ALBENDAZOLE                           | P02CA03  |                                        | 3             | 2    | TABS | PO    | OD   | EOSINOPHILIA,PAR<br>SITE STOOL TEST<br>POSITIVE |
|        |         | Sevuparin/DF02+<br>Malanil | 1      | Potassium<br>Chloride              | POTASSIUM<br>CHLORIDE                 | B05XA01  |                                        | 2             | 10   | ML   | IV    | OD   | HYPOKALEMIA                                     |
|        |         | Sevuparin/DF02+<br>Malanil | 2      | PARA                               | PARACETAMOL                           | N02BE01  |                                        | 1             | 300  | MG   | IM    | OD   | FEVER                                           |
|        |         | Sevuparin/DF02+<br>Malanil | 3      | FS                                 | FERROUS SULFATE                       | B03AA07  |                                        | 20            | 1    | TABS | PO    | TDS  | ANEMIA                                          |
|        |         | Sevuparin/DF02+<br>Malanil | 4      | Dextrose 5%<br>in normal<br>saline | ELECTROLYTES<br>WITH<br>CARBOHYDRATES | B05BB02  |                                        | 2             | 1000 | ML   | IV    | OD   | HYPOKALEMIA                                     |
|        |         | Malanil                    | 1      | Chlorphenira<br>mine               | CHLORPHENAMINE                        | R06AB04  |                                        | 1             | 2    | TABS | PO    | OD   | ERYTHEMATOUS<br>RASH                            |
|        |         | Malanil                    | 2      | Calamine<br>lotion                 | OTHER<br>ANTIPRURITICS                | D04AX    |                                        | 1             | 60   | ML   | TOP   | PRN  | ERYTHEMATOUS<br>RASH                            |
|        |         | Malanil                    | 1      | PARA                               | PARACETAMOL                           | N02BE01  |                                        | NK            | 2    | TABS | PO    | PRN  | FEVER                                           |
|        |         | Sevuparin/DF02+<br>Malanil | 1      | PARA                               | PARACETAMOL                           | N02BE01  |                                        | 2             | 2    | TABS | PO    | PRN  | FEVER                                           |
|        |         | Sevuparin/DF02+<br>Malanil | 2      | GLUCOSE                            | GLUCOSE                               | V06DC01  |                                        | 1             | 50   | ML   | IV    | PRN  | ANOREXIA                                        |

## TSM02 Individual subject listings part 2

## CSR Appendix 16.2

| SUBJID | INITIAL | ARM                        | CM SEQ | DRUGNAME                            | ATC TERM                                 | ATC CODE | START DATE<br>TIME<br><i>99:99=UNK</i> | DUR<br>(days) | DOSE | UNIT  | ROUTE | FREQ | INDICATION     |
|--------|---------|----------------------------|--------|-------------------------------------|------------------------------------------|----------|----------------------------------------|---------------|------|-------|-------|------|----------------|
|        |         | Sevuparin/DF02+<br>Malanil | 3      | PARA                                | PARACETAMOL                              | N02BE01  |                                        | 1             | 2    | ML    | IM    | PRN  | FEVER          |
|        |         | Sevuparin/DF02+<br>Malanil | 4      | 5% DNSS<br>Dextrose 5%<br>in Saline | ELECTROLYTES<br>WITH<br>CARBOHYDRATES    | B05BB02  |                                        | 1             | 1000 | ML    | IV    | OD   | ANOREXIA       |
|        |         | Sevuparin/DF02+<br>Malanil | 5      | PLA                                 | METOCLOPRAMIDE                           | A03FA01  |                                        | 1             | 2    | ML    | IV    | PRN  | ANOREXIA       |
|        |         | Sevuparin/DF02+<br>Malanil | 6      | AMOX                                | AMOXICILLIN                              | J01CA04  |                                        | 8             | 2    | TABS  | PO    | BD   | PHARYNGITIS    |
|        |         | Sevuparin/DF02+<br>Malanil | 7      | FLUIMUCIL                           | ACETYLCYSTEINE                           | R05CB01  |                                        | 4             | 100  | MG    | PO    | TDS  | PHARYNGITIS    |
|        |         | Sevuparin/DF02+<br>Malanil | 8      | PARA                                | PARACETAMOL                              | N02BE01  |                                        | NK            | 2    | TABS  | PO    | PRN  | PHARYNGITIS    |
|        |         | Sevuparin/DF02+<br>Malanil | 1      | 5% DNSS<br>Dextrose 5%<br>in Saline | ELECTROLYTES<br>WITH<br>CARBOHYDRATES    | B05BB02  |                                        | 1             | 2000 | ML    | IV    | OD   | SUPPLEMENT     |
|        |         | Sevuparin/DF02+<br>Malanil | 2      | PARA                                | PARACETAMOL                              | N02BE01  |                                        | 2             | 2    | TABS  | PO    | PRN  | FEVER          |
|        |         | Sevuparin/DF02+<br>Malanil | 3      | ALUMMILK                            | ANTACIDS                                 | A02A     |                                        | 1             | 30   | ML    | PO    | PRN  | ABDOMINAL PAIN |
|        |         | Sevuparin/DF02+<br>Malanil | 4      | ORS                                 | ORAL REHYDRATION<br>SALT<br>FORMULATIONS | A07CA    |                                        | 1             | 1    | UNITS | PO    | PRN  | SUPPLEMENT     |
|        |         | Malanil                    | 1      | PARA                                | PARACETAMOL                              | N02BE01  |                                        | 1             | 2    | TABS  | PO    | PRN  | FEVER          |

## TSM02 Individual subject listings part 2

## CSR Appendix 16.2

| SUBJID | INITIAL | ARM                        | CM SEQ | DRUGNAME                                                        | ATC TERM                                  | ATC CODE | START DATE<br>TIME<br><i>99:99=UNK</i> | DUR<br>(days) | DOSE | UNIT | ROUTE | FREQ | INDICATION                 |
|--------|---------|----------------------------|--------|-----------------------------------------------------------------|-------------------------------------------|----------|----------------------------------------|---------------|------|------|-------|------|----------------------------|
|        |         | Sevuparin/DF02+<br>Malanil | 1      | PARA                                                            | PARACETAMOL                               | N02BE01  |                                        | 1             | 2    | TABS | PO    | PRN  | FEVER                      |
|        |         | Sevuparin/DF02+<br>Malanil | 1      | PARA                                                            | PARACETAMOL                               | N02BE01  |                                        | 2             | 2    | TABS | PO    | PRN  | FEVER                      |
|        |         | Malanil                    | 1      | PARA                                                            | PARACETAMOL                               | N02BE01  |                                        | 3             | 2    | TABS | PO    | PRN  | FEVER                      |
|        |         | Malanil                    | 2      | PLA                                                             | METOCLOPRAMIDE                            | A03FA01  |                                        | 1             | 10   | MG   | IV    | PRN  | NAUSEA                     |
|        |         | Malanil                    | 3      | DOMPERID<br>ONE                                                 | DOMPERIDONE                               | A03FA03  |                                        | 3             | 1    | TABS | PO    | QDS  | ANTIEMETIC                 |
|        |         | Malanil                    | 1      | PARA                                                            | PARACETAMOL                               | N02BE01  |                                        | 1             | 2    | TABS | PO    | PRN  | FEVER                      |
|        |         | Malanil                    | 2      | POTASSIUM<br>CHLORIDE<br>ELIXIR                                 | POTASSIUM<br>CHLORIDE                     | A12BA01  |                                        | 1             | 30   | ML   | PO    | PRN  | HYPOKALEMIA                |
|        |         | Sevuparin/DF02+<br>Malanil | 1      | PARA                                                            | PARACETAMOL                               | N02BE01  |                                        | 1             | 2    | TABS | PO    | PRN  | FEVER                      |
|        |         | Sevuparin/DF02+<br>Malanil | 2      | OFLOXACIN                                                       | OFLOXACIN                                 | J01MA01  |                                        | 5             | 400  | MG   | PO    | BD   | URINARY TRACT<br>INFECTION |
|        |         | Sevuparin/DF02+<br>Malanil | 3      | Levonorgestre<br>l (0.15mg)<br>Ethinyl<br>estradiol<br>(0.03mg) | LEVONORGESTREL<br>AND<br>ETHINYLESTRADIOL | G03AA07  |                                        | ONGO<br>ING   | 1    | TABS | PO    | OD   | PREVENT<br>PREGNANCY       |
|        |         | Sevuparin/DF02+<br>Malanil | 1      | PLA                                                             | METOCLOPRAMIDE                            | A03FA01  |                                        | 1             | 10   | MG   | IV    | PRN  | VOMITING                   |

## TSM02 Individual subject listings part 2

## CSR Appendix 16.2

| SUBJID | INITIAL | ARM                        | CM SEQ | DRUGNAME                                                          | ATC TERM                                  | ATC CODE | START DATE<br>TIME<br><i>99:99=UNK</i> | DUR<br>(days) | DOSE | UNIT | ROUTE | FREQ | INDICATION           |
|--------|---------|----------------------------|--------|-------------------------------------------------------------------|-------------------------------------------|----------|----------------------------------------|---------------|------|------|-------|------|----------------------|
|        |         | Malanil                    |        |                                                                   |                                           |          |                                        |               |      |      |       |      |                      |
|        |         | Sevuparin/DF02+<br>Malanil | 2      | PARA                                                              | PARACETAMOL                               | N02BE01  |                                        | 3             | 2    | TABS | PO    | PRN  | FEVER                |
|        |         | Sevuparin/DF02+<br>Malanil | 3      | Levonorgestre<br>l (0.15 mg)<br>Ethinyl<br>estradiol (0.03<br>mg) | LEVONORGESTREL<br>AND<br>ETHINYLESTRADIOL | G03AA07  |                                        | ONGO<br>ING   | 1    | TABS | PO    | OD   | PREVENT<br>PREGNANCY |
|        |         | Sevuparin/DF02+<br>Malanil | 1      | PARA                                                              | PARACETAMOL                               | N02BE01  |                                        | 3             | 2    | TABS | PO    | PRN  | FEVER                |
|        |         | Sevuparin/DF02+<br>Malanil | 2      | NORMAL<br>SALINE<br>SOLUTION                                      | SODIUM CHLORIDE                           | B05XA03  |                                        | 2             | 1000 | ML   | IV    | OD   | ANOREXIA             |
|        |         | Sevuparin/DF02+<br>Malanil | 3      | RANITIDINE                                                        | RANITIDINE                                | A02BA02  |                                        | 4             | 1    | TABS | PO    | BD   | ABDOMINAL PAIN       |
|        |         | Sevuparin/DF02+<br>Malanil | 4      | ANTACID<br>SUSPENSIO<br>N                                         | ANTACIDS                                  | A02A     |                                        | 4             | 30   | ML   | PO    | TDS  | ABDOMINAL PAIN       |
|        |         | Sevuparin/DF02+<br>Malanil | 5      | Levonorgestre<br>l (0.15 mg)<br>Ethinyl<br>estradiol (0.03<br>mg) | LEVONORGESTREL<br>AND<br>ETHINYLESTRADIOL | G03AA07  |                                        | ONGO<br>ING   | 1    | TABS | PO    | OD   | PREVENT<br>PREGNANCY |
|        |         | Sevuparin/DF02+<br>Malanil | 1      | PARA                                                              | PARACETAMOL                               | N02BE01  |                                        | 3             | 2    | TABS | PO    | PRN  | FEVER                |
|        |         | Sevuparin/DF02+<br>Malanil | 1      | PARA                                                              | PARACETAMOL                               | N02BE01  |                                        | 2             | 2    | TABS | PO    | PRN  | FEVER                |

## TSM02 Individual subject listings part 2

## CSR Appendix 16.2

| SUBJID | INITIAL | ARM                        | CM SEQ | DRUGNAME                        | ATC TERM              | ATC CODE | START DATE<br>TIME<br><i>99:99=UNK</i> | DUR<br>(days) | DOSE | UNIT | ROUTE | FREQ | INDICATION  |
|--------|---------|----------------------------|--------|---------------------------------|-----------------------|----------|----------------------------------------|---------------|------|------|-------|------|-------------|
|        |         | Sevuparin/DF02+<br>Malanil | 2      | NORMAL<br>SALINE<br>SOLUTION    | SODIUM CHLORIDE       | B05XA03  |                                        | 4             | 1920 | ML   | IV    | OD   | ANOREXIA    |
|        |         | Sevuparin/DF02+<br>Malanil | 3      | POTASSIUM<br>CHLORIDE<br>ELIXIR | POTASSIUM<br>CHLORIDE | A12BA01  |                                        | 1             | 30   | ML   | PO    | PRN  | ANOREXIA    |
|        |         | Sevuparin/DF02+<br>Malanil | 1      | PARA                            | PARACETAMOL           | N02BE01  |                                        | 2             | 2    | TABS | PO    | PRN  | FEVER       |
|        |         | Sevuparin/DF02+<br>Malanil | 2      | POTASSIUM<br>CHLORIDE<br>ELIXIR | POTASSIUM<br>CHLORIDE | A12BA01  |                                        | 1             | 60   | ML   | PO    | OD   | ANOREXIA    |
|        |         | Sevuparin/DF02+<br>Malanil | 1      | POTASSIUM<br>CHLORIDE<br>ELIXIR | POTASSIUM<br>CHLORIDE | A12BA01  |                                        | 1             | 30   | ML   | PO    | PRN  | HYPOKALEMIA |
|        |         | Sevuparin/DF02+<br>Malanil | 2      | PARA                            | PARACETAMOL           | N02BE01  |                                        | 3             | 2    | TABS | PO    | PRN  | FEVER       |
|        |         | Malanil                    | 1      | PARA                            | PARACETAMOL           | N02BE01  |                                        | 2             | 2    | TABS | PO    | PRN  | FEVER       |
|        |         | Malanil                    | 1      | PARA                            | PARACETAMOL           | N02BE01  |                                        | 2             | 2    | TABS | PO    | PRN  | FEVER       |
|        |         | Malanil                    | 1      | PARA                            | PARACETAMOL           | N02BE01  |                                        | 1             | 2    | TABS | PO    | PRN  | FEVER       |
|        |         | Malanil                    | 1      | PARA                            | PARACETAMOL           | N02BE01  |                                        | 1             | 2    | TABS | PO    | PRN  | FEVER       |
|        |         | Malanil                    | 1      | PARA                            | PARACETAMOL           | N02BE01  |                                        | 2             | 2    | TABS | PO    | PRN  | FEVER       |

## TSM02 Individual subject listings part 2

## CSR Appendix 16.2

| SUBJID | INITIAL | ARM                        | CM SEQ | DRUGNAME                            | ATC TERM                              | ATC CODE | START DATE<br>TIME<br><i>99:99=UNK</i> | DUR<br>(days) | DOSE | UNIT | ROUTE | FREQ | INDICATION            |
|--------|---------|----------------------------|--------|-------------------------------------|---------------------------------------|----------|----------------------------------------|---------------|------|------|-------|------|-----------------------|
|        |         | Malanil                    | 1      | PARA                                | PARACETAMOL                           | N02BE01  |                                        | 2             | 2    | TABS | PO    | PRN  | FEVER                 |
|        |         | Malanil                    | 1      | PARA                                | PARACETAMOL                           | N02BE01  |                                        | 2             | 2    | TABS | PO    | PRN  | FEVER                 |
|        |         | Sevuparin/DF02+<br>Malanil | 1      | PARA                                | PARACETAMOL                           | N02BE01  |                                        | 3             | 2    | TABS | PO    | PRN  | FEVER                 |
|        |         | Malanil                    | 1      | PARA                                | PARACETAMOL                           | N02BE01  |                                        | 2             | 2    | TABS | PO    | PRN  | FEVER                 |
|        |         | Malanil                    | 1      | PARA                                | PARACETAMOL                           | N02BE01  |                                        | 1             | 2    | TABS | PO    | PRN  | FEVER                 |
|        |         | Sevuparin/DF02+<br>Malanil | 1      | PARA                                | PARACETAMOL                           | N02BE01  |                                        | 1             | 2    | TABS | PO    | PRN  | FEVER                 |
|        |         | Sevuparin/DF02+<br>Malanil | 2      | FERROUS<br>SULFATE                  | FERROUS SULFATE                       | B03AA07  |                                        | 20            | 1    | TABS | PO    | TDS  | PROPHYLAXIS<br>ANEMIA |
|        |         | Sevuparin/DF02+<br>Malanil | 1      | PARA                                | PARACETAMOL                           | N02BE01  |                                        | 1             | 2    | TABS | PO    | PRN  | FEVER                 |
|        |         | Sevuparin/DF02+<br>Malanil | 1      | PARA                                | PARACETAMOL                           | N02BE01  |                                        | 3             | 2    | TABS | PO    | PRN  | FEVER                 |
|        |         | Sevuparin/DF02+<br>Malanil | 2      | Dextrose 5%<br>in sterile<br>saline | ELECTROLYTES<br>WITH<br>CARBOHYDRATES | B05BB02  |                                        | 2             | 1000 | ML   | IV    | OD   | ANOREXIA              |
|        |         | Sevuparin/DF02+<br>Malanil | 1      | PARA                                | PARACETAMOL                           | N02BE01  |                                        | 1             | 2    | TABS | PO    | PRN  | FEVER                 |



TSM02 Individual subject listings part 2

CSR Appendix 16.2

| SUBJID | INITIAL | ARM     | CM SEQ | DRUGNAME                                | ATC TERM                              | ATC CODE | START DATE<br>TIME<br><i>99:99=UNK</i> | DUR<br>(days) | DOSE | UNIT | ROUTE | FREQ | INDICATION |
|--------|---------|---------|--------|-----------------------------------------|---------------------------------------|----------|----------------------------------------|---------------|------|------|-------|------|------------|
|        |         | Malanil | 1      | PARA                                    | PARACETAMOL                           | N02BE01  |                                        | 3             | 2    | TABS | PO    | PRN  | FEVER      |
|        |         | Malanil | 2      | Dextrose 5%<br>in 0.5 sterile<br>saline | ELECTROLYTES<br>WITH<br>CARBOHYDRATES | B05BB02  |                                        | 2             | 2000 | ML   | IV    | OD   | ANOREXIA   |
|        |         | Malanil | 1      | PARA                                    | PARACETAMOL                           | N02BE01  |                                        | 3             | 2    | TABS | PO    | PRN  | FEVER      |
|        |         | Malanil | 1      | PARA                                    | PARACETAMOL                           | N02BE01  |                                        | 3             | 2    | TABS | PO    | PRN  | FEVER      |
