# Supplementary material for: Inhibition of merozoite invasion and transient de-sequestration by sevuparin in humans with Plasmodium falciparum malaria
Source: PubMed Central journal article supplement (PMC5731734; doi:10.1371/journal.pone.0188754), 2017-12-15

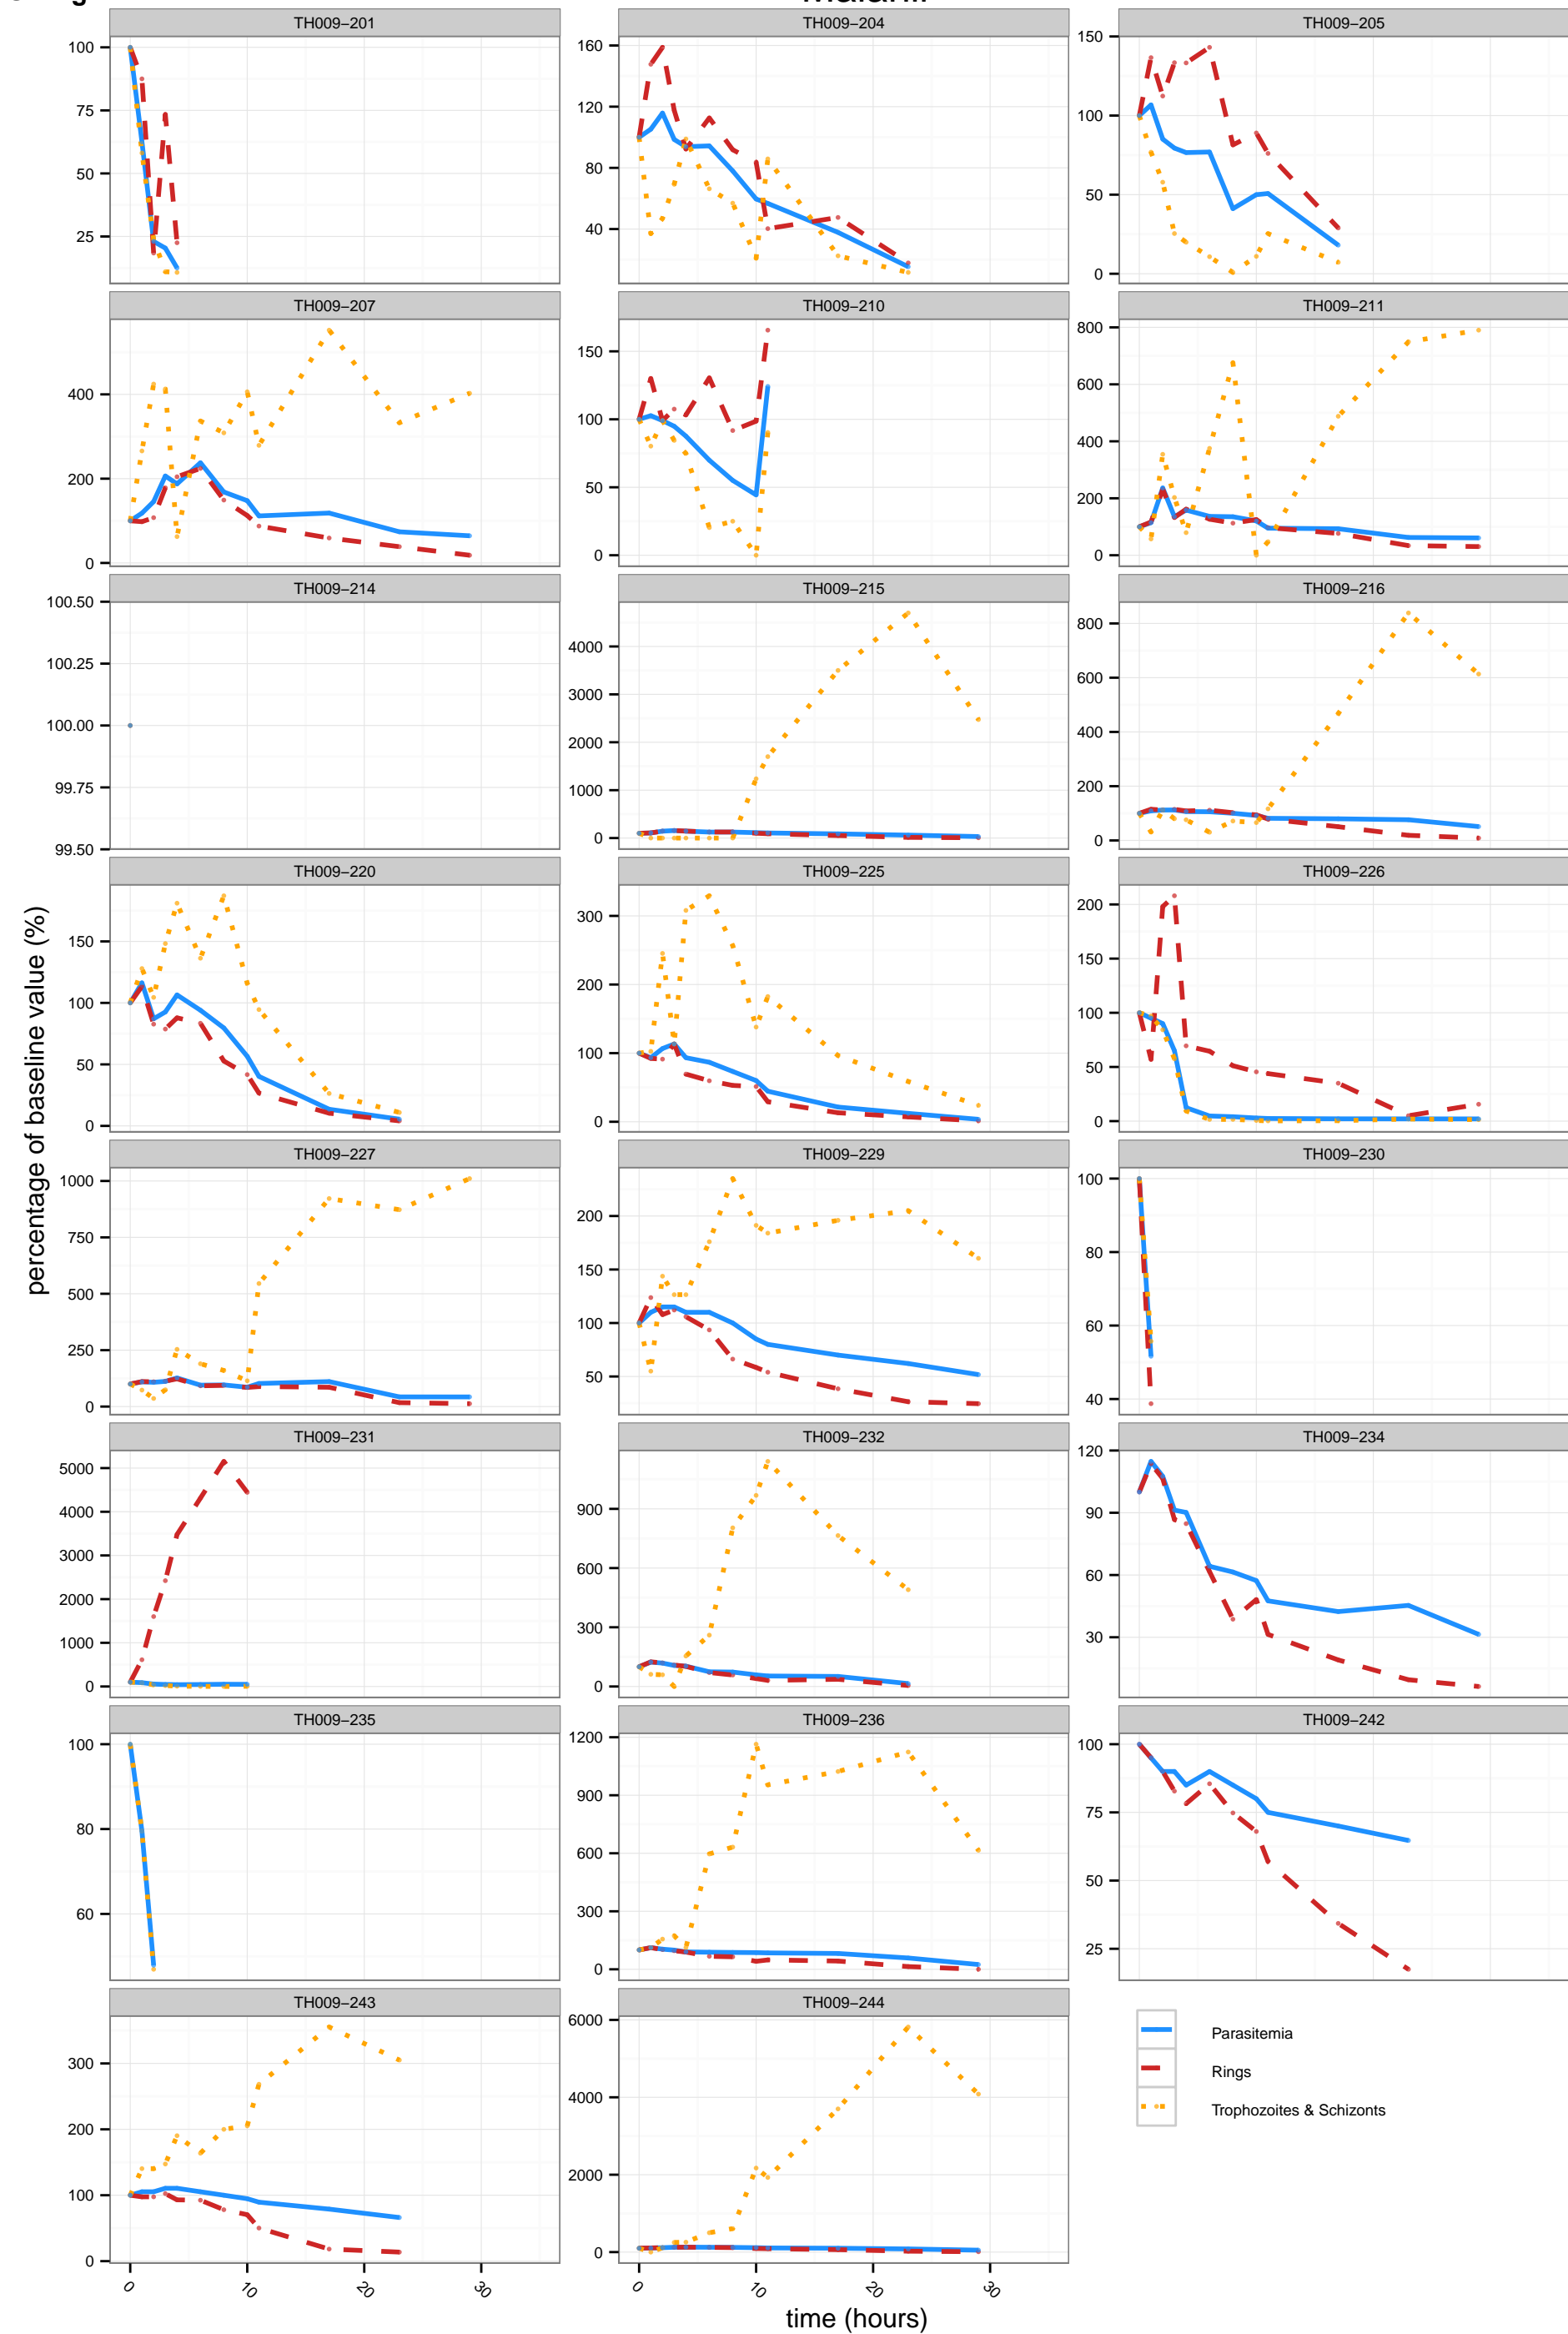

FS2 Fig cont.

Sevuparin/Malanil

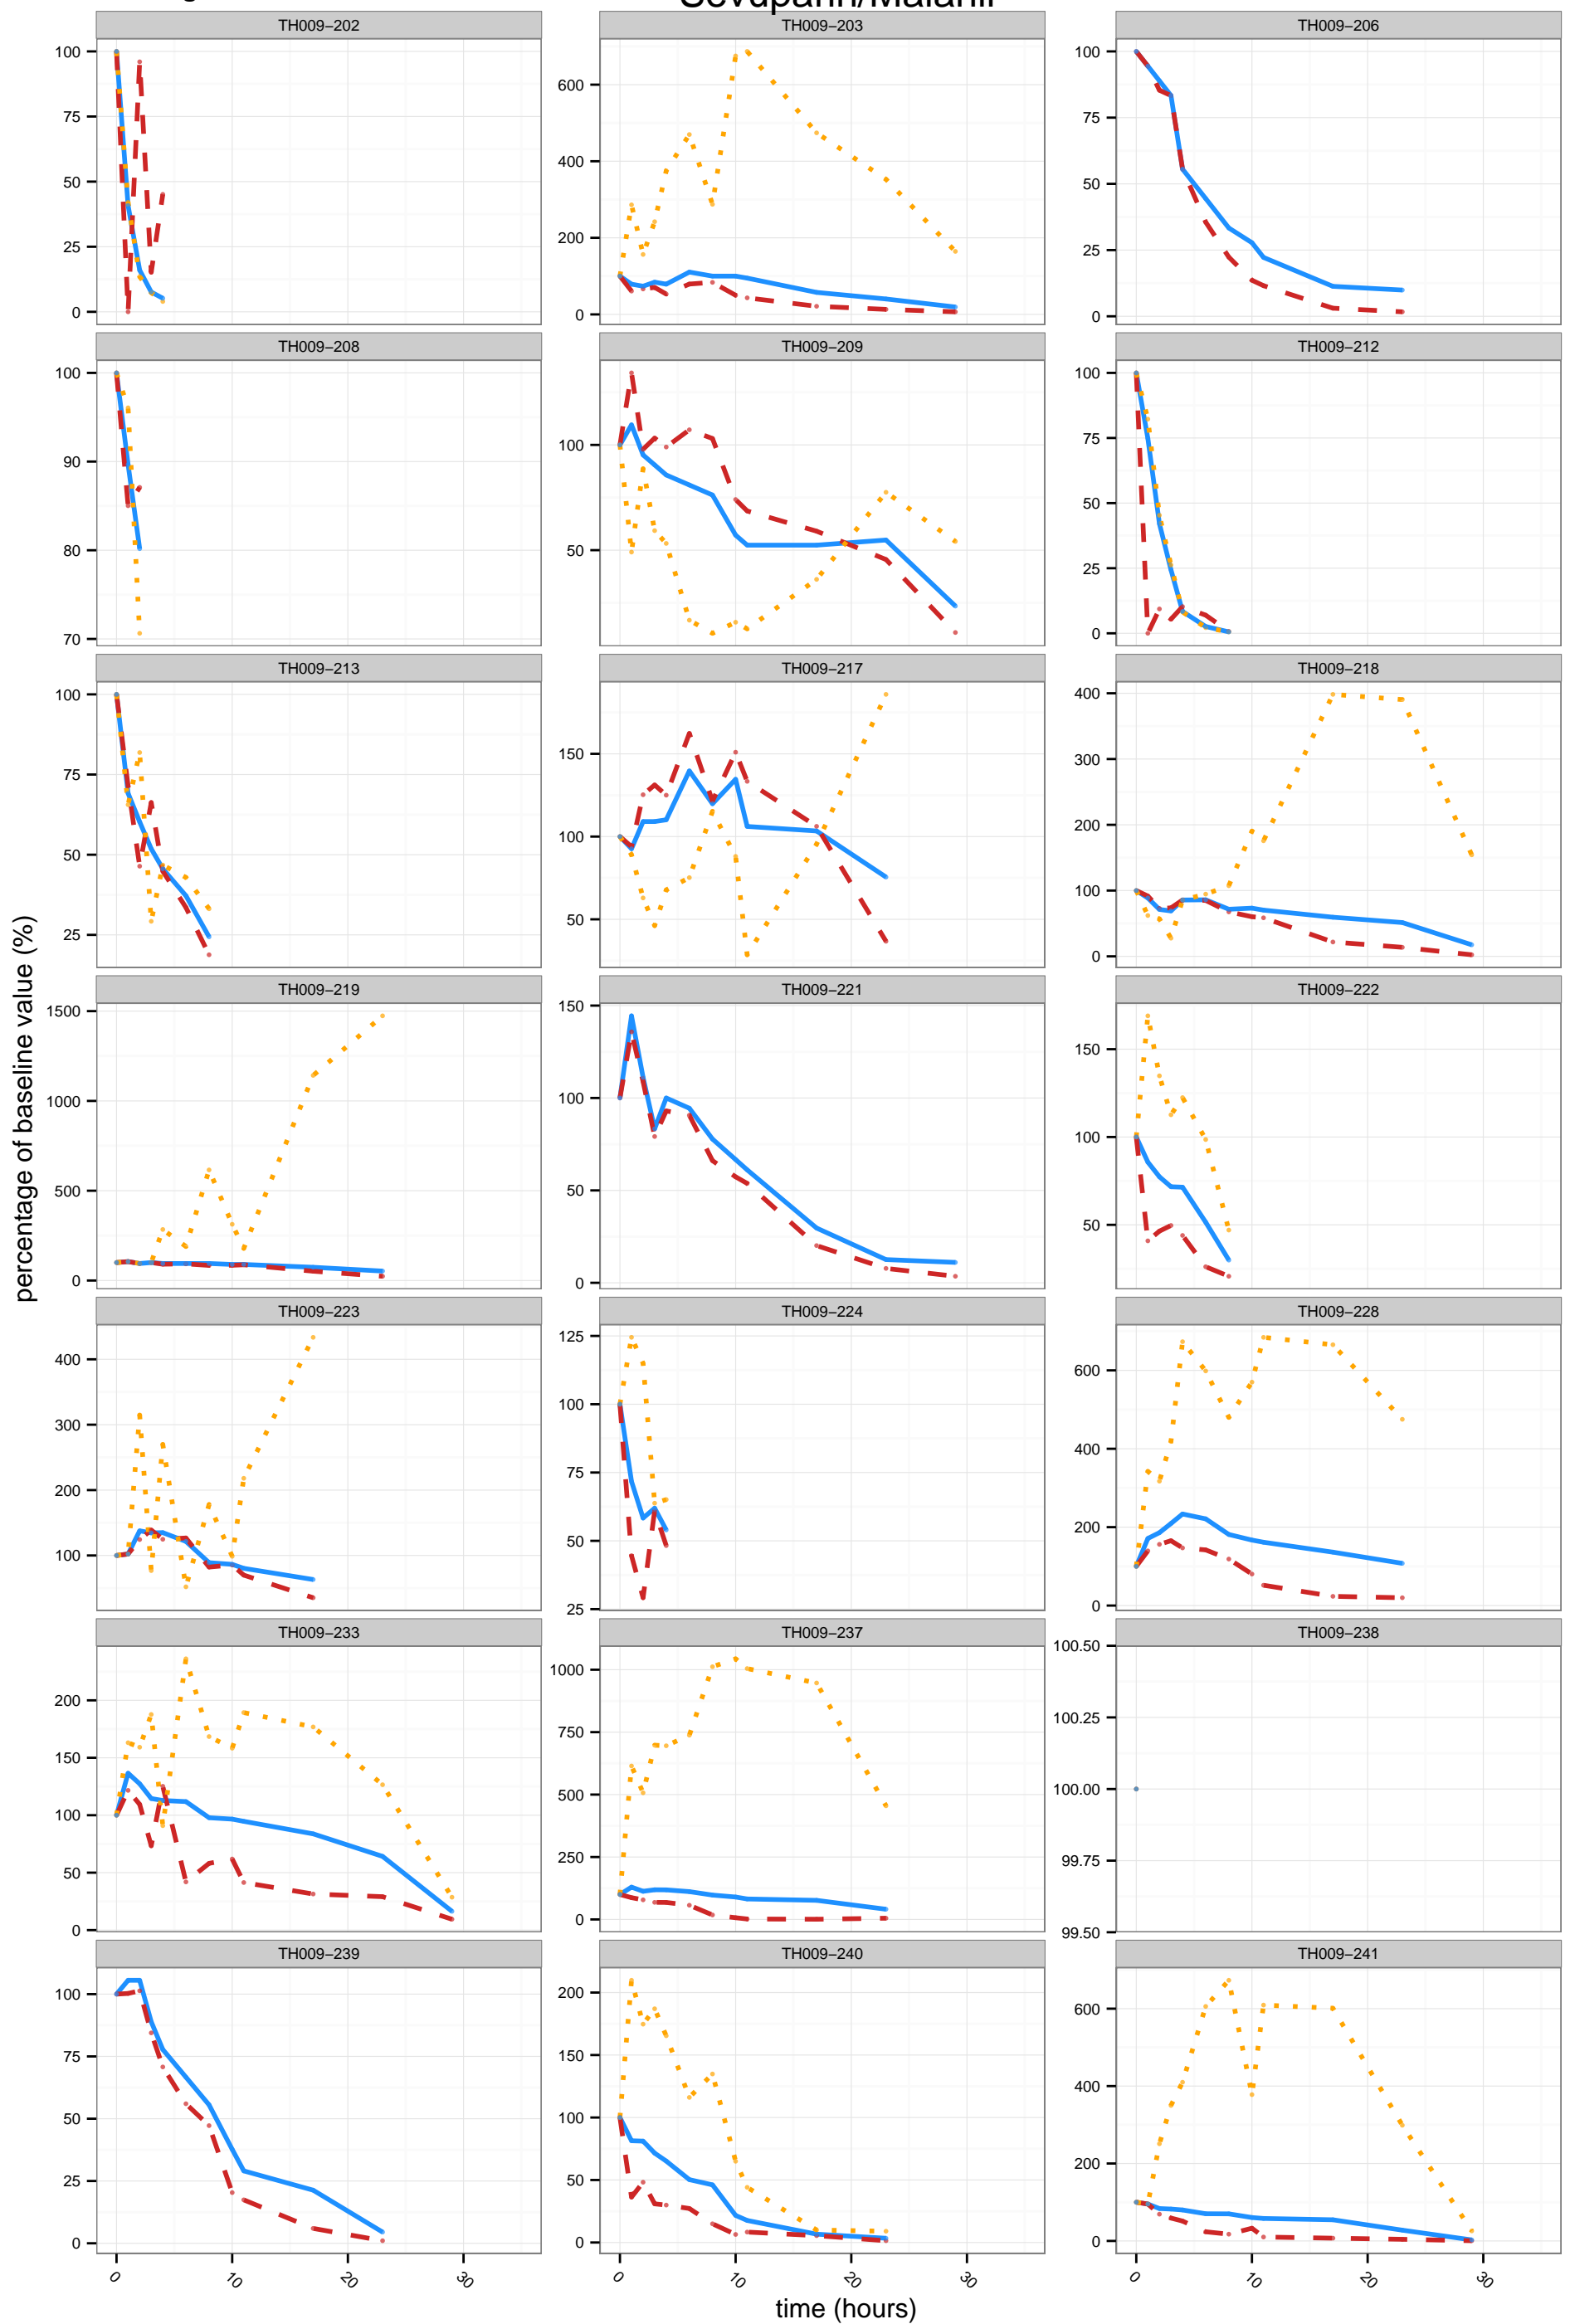

Supplement: pone.0188754.s006.pdf [file pone.0188754.s006.pdf]
